# Supplementary material for: Mesolimbic dopamine projections mediate cue-motivated reward seeking but not reward retrieval in rats
Source: eLife journal article supplement (doi:10.7554/elife.43551), 2019-05-20
Supplement: supp [file elife-43551-supp-v1.zip]

Archive with 15 entries (15 files):
- elife_poa_e43551_Figure_4_figure_supplement_3.jpg
- elife_poa_e43551_Figure_1_source_data_1.xlsx
- elife_poa_e43551_Figure_4_figure_supplement_5.jpg
- elife_poa_e43551_Figure_3_figure_supplement_1.jpg
- elife_poa_e43551_Figure_4_figure_supplement_1.jpg
- elife_poa_e43551_Supplementary_file_1.docx
- elife_poa_e43551_Figure_4_figure_supplement_2.jpg
- elife_poa_e43551_Figure_5_figure_supplement_1.jpg
- elife_poa_e43551_Figure_3_source_data_1.xlsx
- elife_poa_e43551_Figure_5_source_data_1.xlsx
- elife_poa_e43551_Figure_4_source_data_1.xlsx
- elife_poa_e43551_Figure_3_figure_supplement_2.jpg
- elife_poa_e43551_Transparent_Reporting_File.pdf
- elife_poa_e43551_Figure_3_figure_supplement_3.jpg
- elife_poa_e43551_Figure_4_figure_supplement_4.jpg
