# Supplementary material for: Mesolimbic dopamine projections mediate cue-motivated reward seeking but not reward retrieval in rats
Source: eLife journal article supplement (doi:10.7554/elife.43551), 2019-05-20
Supplement: supp [file elife-43551-supp-v1.zip › elife_poa_e43551_Figure_1_source_data_1.xlsx]

## Sheet: Figure 1
Rat	Test	Session	LeverPresses_NonReinforced	PressesFollowedByApproach_NonReinforced	LeverPresses_Reinforced	PressesFollowedByApproach_Reinforced	PropPressesFollowedByApproach_NonReinforced	PropPressesFollowedByApproach_Reinforced	PropPressesFollowedByApproach_Extinction	PressesFollowedByApproach_Extinction	LeverPresses_Extinction
1	Ext	1	139	51	25	6	0.366906	0.24	0.347561	57	164
1	RI60	2	187	70	27	27	0.374332	1
1	Cue	3	104	24	26	20	0.230769	0.769231
2	Ext	1	123	38	29	10	0.308943	0.344828	0.315789	48	152
2	RI60	2	286	86	21	21	0.300699	1
2	Cue	3	113	26	27	13	0.230088	0.481481
3	Cue	1	169	40	20	17	0.236686	0.85
3	RI60	2	192	65	20	20	0.338542	1
3	Ext	3	105	27	27	8	0.257143	0.296296	0.265152	35	132
4	Cue	1	232	61	17	13	0.262931	0.764706
4	RI60	2	252	106	31	29	0.420635	0.935484
4	Ext	3	128	64	23	14	0.5	0.608696	0.516556	78	151
5	Ext	1	66	32	24	16	0.484848	0.666667	0.533333	48	90
5	RI60	2	177	62	30	30	0.350282	1
5	Cue	3	97	20	20	15	0.206186	0.75
6	Ext	1	71	18	23	8	0.253521	0.347826	0.276596	26	94
6	RI60	2	103	46	19	18	0.446602	0.947368
6	Cue	3	47	13	14	12	0.276596	0.857143
7	Cue	1	148	40	23	20	0.27027	0.869565
7	RI60	2	112	50	22	21	0.446429	0.954545
7	Ext	3	118	33	24	9	0.279661	0.375	0.295775	42	142
8	Cue	1	130	32	22	20	0.246154	0.909091
8	RI60	2	165	85	26	26	0.515152	1
8	Ext	3	79	42	24	16	0.531646	0.666667	0.563107	58	103
9	Ext	1	133	27	22	4	0.203008	0.181818	0.2	31	155
9	RI60	2	337	88	30	30	0.261128	1
9	Cue	3	92	15	18	13	0.163043	0.722222
