# Supplementary material for: Mesolimbic dopamine projections mediate cue-motivated reward seeking but not reward retrieval in rats
Source: eLife journal article supplement (doi:10.7554/elife.43551), 2019-05-20
Supplement: supp [file elife-43551-supp-v1.zip › elife_poa_e43551_Figure_3_source_data_1.xlsx]

## Sheet: Figure 3B and C
Rat	Group	Sex	Drug	PreDurPost	CS	LeverCount
1	mCherry	F	CNO	CS	Paired	9
1	mCherry	F	CNO	CS	Unpaired	35
1	mCherry	F	CNO	Pre	Paired	12
1	mCherry	F	CNO	Pre	Unpaired	30
1	mCherry	F	Veh	CS	Paired	21
1	mCherry	F	Veh	CS	Unpaired	20
1	mCherry	F	Veh	Pre	Paired	14
1	mCherry	F	Veh	Pre	Unpaired	11
3	hM4Di	F	CNO	CS	Paired	3
3	hM4Di	F	CNO	CS	Unpaired	4
3	hM4Di	F	CNO	Pre	Paired	1
3	hM4Di	F	CNO	Pre	Unpaired	0
3	hM4Di	F	Veh	CS	Paired	30
3	hM4Di	F	Veh	CS	Unpaired	23
3	hM4Di	F	Veh	Pre	Paired	17
3	hM4Di	F	Veh	Pre	Unpaired	13
4	hM4Di	F	CNO	CS	Paired	18
4	hM4Di	F	CNO	CS	Unpaired	13
4	hM4Di	F	CNO	Pre	Paired	21
4	hM4Di	F	CNO	Pre	Unpaired	2
4	hM4Di	F	Veh	CS	Paired	17
4	hM4Di	F	Veh	CS	Unpaired	8
4	hM4Di	F	Veh	Pre	Paired	10
4	hM4Di	F	Veh	Pre	Unpaired	6
5	mCherry	F	CNO	CS	Paired	9
5	mCherry	F	CNO	CS	Unpaired	28
5	mCherry	F	CNO	Pre	Paired	17
5	mCherry	F	CNO	Pre	Unpaired	27
5	mCherry	F	Veh	CS	Paired	26
5	mCherry	F	Veh	CS	Unpaired	22
5	mCherry	F	Veh	Pre	Paired	7
5	mCherry	F	Veh	Pre	Unpaired	21
6	mCherry	F	CNO	CS	Paired	32
6	mCherry	F	CNO	CS	Unpaired	29
6	mCherry	F	CNO	Pre	Paired	14
6	mCherry	F	CNO	Pre	Unpaired	16
6	mCherry	F	Veh	CS	Paired	36
6	mCherry	F	Veh	CS	Unpaired	20
6	mCherry	F	Veh	Pre	Paired	23
6	mCherry	F	Veh	Pre	Unpaired	12
7	hM4Di	F	CNO	CS	Paired	37
7	hM4Di	F	CNO	CS	Unpaired	15
7	hM4Di	F	CNO	Pre	Paired	22
7	hM4Di	F	CNO	Pre	Unpaired	11
7	hM4Di	F	Veh	CS	Paired	76
7	hM4Di	F	Veh	CS	Unpaired	30
7	hM4Di	F	Veh	Pre	Paired	40
7	hM4Di	F	Veh	Pre	Unpaired	40
9	mCherry	F	CNO	CS	Paired	31
9	mCherry	F	CNO	CS	Unpaired	15
9	mCherry	F	CNO	Pre	Paired	6
9	mCherry	F	CNO	Pre	Unpaired	25
9	mCherry	F	Veh	CS	Paired	29
9	mCherry	F	Veh	CS	Unpaired	17
9	mCherry	F	Veh	Pre	Paired	11
9	mCherry	F	Veh	Pre	Unpaired	18
10	hM4Di	F	CNO	CS	Paired	50
10	hM4Di	F	CNO	CS	Unpaired	34
10	hM4Di	F	CNO	Pre	Paired	26
10	hM4Di	F	CNO	Pre	Unpaired	35
10	hM4Di	F	Veh	CS	Paired	45
10	hM4Di	F	Veh	CS	Unpaired	46
10	hM4Di	F	Veh	Pre	Paired	18
10	hM4Di	F	Veh	Pre	Unpaired	57
12	hM4Di	M	CNO	CS	Paired	10
12	hM4Di	M	CNO	CS	Unpaired	12
12	hM4Di	M	CNO	Pre	Paired	5
12	hM4Di	M	CNO	Pre	Unpaired	13
12	hM4Di	M	Veh	CS	Paired	6
12	hM4Di	M	Veh	CS	Unpaired	5
12	hM4Di	M	Veh	Pre	Paired	2
12	hM4Di	M	Veh	Pre	Unpaired	8
13	mCherry	M	CNO	CS	Paired	25
13	mCherry	M	CNO	CS	Unpaired	0
13	mCherry	M	CNO	Pre	Paired	2
13	mCherry	M	CNO	Pre	Unpaired	4
13	mCherry	M	Veh	CS	Paired	26
13	mCherry	M	Veh	CS	Unpaired	8
13	mCherry	M	Veh	Pre	Paired	5
13	mCherry	M	Veh	Pre	Unpaired	0
15	mCherry	M	CNO	CS	Paired	37
15	mCherry	M	CNO	CS	Unpaired	9
15	mCherry	M	CNO	Pre	Paired	7
15	mCherry	M	CNO	Pre	Unpaired	15
15	mCherry	M	Veh	CS	Paired	44
15	mCherry	M	Veh	CS	Unpaired	35
15	mCherry	M	Veh	Pre	Paired	22
15	mCherry	M	Veh	Pre	Unpaired	10
16	hM4Di	F	CNO	CS	Paired	10
16	hM4Di	F	CNO	CS	Unpaired	10
16	hM4Di	F	CNO	Pre	Paired	4
16	hM4Di	F	CNO	Pre	Unpaired	4
16	hM4Di	F	Veh	CS	Paired	13
16	hM4Di	F	Veh	CS	Unpaired	23
16	hM4Di	F	Veh	Pre	Paired	7
16	hM4Di	F	Veh	Pre	Unpaired	14
18	hM4Di	F	CNO	CS	Paired	27
18	hM4Di	F	CNO	CS	Unpaired	19
18	hM4Di	F	CNO	Pre	Paired	23
18	hM4Di	F	CNO	Pre	Unpaired	15
18	hM4Di	F	Veh	CS	Paired	19
18	hM4Di	F	Veh	CS	Unpaired	13
18	hM4Di	F	Veh	Pre	Paired	10
18	hM4Di	F	Veh	Pre	Unpaired	14
19	hM4Di	F	CNO	CS	Paired	24
19	hM4Di	F	CNO	CS	Unpaired	9
19	hM4Di	F	CNO	Pre	Paired	18
19	hM4Di	F	CNO	Pre	Unpaired	11
19	hM4Di	F	Veh	CS	Paired	74
19	hM4Di	F	Veh	CS	Unpaired	28
19	hM4Di	F	Veh	Pre	Paired	44
19	hM4Di	F	Veh	Pre	Unpaired	52
20	hM4Di	M	CNO	CS	Paired	39
20	hM4Di	M	CNO	CS	Unpaired	33
20	hM4Di	M	CNO	Pre	Paired	23
20	hM4Di	M	CNO	Pre	Unpaired	30
20	hM4Di	M	Veh	CS	Paired	35
20	hM4Di	M	Veh	CS	Unpaired	27
20	hM4Di	M	Veh	Pre	Paired	22
20	hM4Di	M	Veh	Pre	Unpaired	34
21	hM4Di	M	CNO	CS	Paired	9
21	hM4Di	M	CNO	CS	Unpaired	10
21	hM4Di	M	CNO	Pre	Paired	7
21	hM4Di	M	CNO	Pre	Unpaired	8
21	hM4Di	M	Veh	CS	Paired	13
21	hM4Di	M	Veh	CS	Unpaired	2
21	hM4Di	M	Veh	Pre	Paired	3
21	hM4Di	M	Veh	Pre	Unpaired	4
22	mCherry	M	CNO	CS	Paired	21
22	mCherry	M	CNO	CS	Unpaired	34
22	mCherry	M	CNO	Pre	Paired	17
22	mCherry	M	CNO	Pre	Unpaired	14
22	mCherry	M	Veh	CS	Paired	24
22	mCherry	M	Veh	CS	Unpaired	26
22	mCherry	M	Veh	Pre	Paired	13
22	mCherry	M	Veh	Pre	Unpaired	22
23	mCherry	M	CNO	CS	Paired	44
23	mCherry	M	CNO	CS	Unpaired	34
23	mCherry	M	CNO	Pre	Paired	54
23	mCherry	M	CNO	Pre	Unpaired	38
23	mCherry	M	Veh	CS	Paired	87
23	mCherry	M	Veh	CS	Unpaired	46
23	mCherry	M	Veh	Pre	Paired	74
23	mCherry	M	Veh	Pre	Unpaired	53
31	hM4Di	M	CNO	CS	Paired	46
31	hM4Di	M	CNO	CS	Unpaired	25
31	hM4Di	M	CNO	Pre	Paired	8
31	hM4Di	M	CNO	Pre	Unpaired	15
31	hM4Di	M	Veh	CS	Paired	43
31	hM4Di	M	Veh	CS	Unpaired	32
31	hM4Di	M	Veh	Pre	Paired	15
31	hM4Di	M	Veh	Pre	Unpaired	19
33	hM4Di	M	CNO	CS	Paired	27
33	hM4Di	M	CNO	CS	Unpaired	2
33	hM4Di	M	CNO	Pre	Paired	27
33	hM4Di	M	CNO	Pre	Unpaired	16
33	hM4Di	M	Veh	CS	Paired	59
33	hM4Di	M	Veh	CS	Unpaired	27
33	hM4Di	M	Veh	Pre	Paired	25
33	hM4Di	M	Veh	Pre	Unpaired	19
34	mCherry	M	CNO	CS	Paired	6
34	mCherry	M	CNO	CS	Unpaired	12
34	mCherry	M	CNO	Pre	Paired	9
34	mCherry	M	CNO	Pre	Unpaired	4
34	mCherry	M	Veh	CS	Paired	2
34	mCherry	M	Veh	CS	Unpaired	11
34	mCherry	M	Veh	Pre	Paired	6
34	mCherry	M	Veh	Pre	Unpaired	6
36	mCherry	F	CNO	CS	Paired	16
36	mCherry	F	CNO	CS	Unpaired	12
36	mCherry	F	CNO	Pre	Paired	8
36	mCherry	F	CNO	Pre	Unpaired	16
36	mCherry	F	Veh	CS	Paired	9
36	mCherry	F	Veh	CS	Unpaired	27
36	mCherry	F	Veh	Pre	Paired	10
36	mCherry	F	Veh	Pre	Unpaired	8
37	mCherry	F	CNO	CS	Paired	12
37	mCherry	F	CNO	CS	Unpaired	5
37	mCherry	F	CNO	Pre	Paired	8
37	mCherry	F	CNO	Pre	Unpaired	2
37	mCherry	F	Veh	CS	Paired	38
37	mCherry	F	Veh	CS	Unpaired	13
37	mCherry	F	Veh	Pre	Paired	3
37	mCherry	F	Veh	Pre	Unpaired	1
38	mCherry	F	CNO	CS	Paired	21
38	mCherry	F	CNO	CS	Unpaired	14
38	mCherry	F	CNO	Pre	Paired	5
38	mCherry	F	CNO	Pre	Unpaired	10
38	mCherry	F	Veh	CS	Paired	30
38	mCherry	F	Veh	CS	Unpaired	14
38	mCherry	F	Veh	Pre	Paired	14
38	mCherry	F	Veh	Pre	Unpaired	6
39	hM4Di	M	CNO	CS	Paired	16
39	hM4Di	M	CNO	CS	Unpaired	21
39	hM4Di	M	CNO	Pre	Paired	29
39	hM4Di	M	CNO	Pre	Unpaired	11
39	hM4Di	M	Veh	CS	Paired	32
39	hM4Di	M	Veh	CS	Unpaired	24
39	hM4Di	M	Veh	Pre	Paired	8
39	hM4Di	M	Veh	Pre	Unpaired	11
40	hM4Di	M	CNO	CS	Paired	11
40	hM4Di	M	CNO	CS	Unpaired	9
40	hM4Di	M	CNO	Pre	Paired	39
40	hM4Di	M	CNO	Pre	Unpaired	35
40	hM4Di	M	Veh	CS	Paired	21
40	hM4Di	M	Veh	CS	Unpaired	18
40	hM4Di	M	Veh	Pre	Paired	17
40	hM4Di	M	Veh	Pre	Unpaired	17
41	hM4Di	F	CNO	CS	Paired	18
41	hM4Di	F	CNO	CS	Unpaired	26
41	hM4Di	F	CNO	Pre	Paired	12
41	hM4Di	F	CNO	Pre	Unpaired	6
41	hM4Di	F	Veh	CS	Paired	21
41	hM4Di	F	Veh	CS	Unpaired	9
41	hM4Di	F	Veh	Pre	Paired	0
41	hM4Di	F	Veh	Pre	Unpaired	3
51	hM4Di	M	CNO	CS	Paired	11
51	hM4Di	M	CNO	CS	Unpaired	2
51	hM4Di	M	CNO	Pre	Paired	6
51	hM4Di	M	CNO	Pre	Unpaired	7
51	hM4Di	M	Veh	CS	Paired	7
51	hM4Di	M	Veh	CS	Unpaired	3
51	hM4Di	M	Veh	Pre	Paired	2
51	hM4Di	M	Veh	Pre	Unpaired	6
52	hM4Di	M	CNO	CS	Paired	20
52	hM4Di	M	CNO	CS	Unpaired	40
52	hM4Di	M	CNO	Pre	Paired	36
52	hM4Di	M	CNO	Pre	Unpaired	13
52	hM4Di	M	Veh	CS	Paired	50
52	hM4Di	M	Veh	CS	Unpaired	13
52	hM4Di	M	Veh	Pre	Paired	37
52	hM4Di	M	Veh	Pre	Unpaired	9
53	hM4Di	M	CNO	CS	Paired	9
53	hM4Di	M	CNO	CS	Unpaired	0
53	hM4Di	M	CNO	Pre	Paired	1
53	hM4Di	M	CNO	Pre	Unpaired	4
53	hM4Di	M	Veh	CS	Paired	22
53	hM4Di	M	Veh	CS	Unpaired	0
53	hM4Di	M	Veh	Pre	Paired	1
53	hM4Di	M	Veh	Pre	Unpaired	1
57	mCherry	M	CNO	CS	Paired	21
57	mCherry	M	CNO	CS	Unpaired	2
57	mCherry	M	CNO	Pre	Paired	6
57	mCherry	M	CNO	Pre	Unpaired	5
57	mCherry	M	Veh	CS	Paired	6
57	mCherry	M	Veh	CS	Unpaired	0
57	mCherry	M	Veh	Pre	Paired	1
57	mCherry	M	Veh	Pre	Unpaired	6
58	mCherry	M	CNO	CS	Paired	21
58	mCherry	M	CNO	CS	Unpaired	14
58	mCherry	M	CNO	Pre	Paired	28
58	mCherry	M	CNO	Pre	Unpaired	23
58	mCherry	M	Veh	CS	Paired	38
58	mCherry	M	Veh	CS	Unpaired	5
58	mCherry	M	Veh	Pre	Paired	39
58	mCherry	M	Veh	Pre	Unpaired	43

## Sheet: Figure 3 D
Group	Drug	Rat	PropPressesFollowedByAnApproach	CSPeriod	SqrtPropPressesFollowedByAnApproach
mCherry	Veh	1	0.380952	CSPlus	0.617213
mCherry	CNO	1	0.555556	CSPlus	0.745356
hM4Di	Veh	3	0.3	CSPlus	0.547723
hM4Di	CNO	3	1	CSPlus	1
hM4Di	Veh	4	0.176471	CSPlus	0.420084
hM4Di	CNO	4	0.222222	CSPlus	0.471405
mCherry	Veh	5	0.461538	CSPlus	0.679366
mCherry	CNO	5	0.666667	CSPlus	0.816497
mCherry	Veh	6	0.277778	CSPlus	0.527046
mCherry	CNO	6	0.625	CSPlus	0.790569
hM4Di	Veh	7	0.697368	CSPlus	0.835086
hM4Di	CNO	7	0.72973	CSPlus	0.854242
mCherry	Veh	9	0.758621	CSPlus	0.870988
mCherry	CNO	9	0.354839	CSPlus	0.595683
hM4Di	Veh	10	0.377778	CSPlus	0.614636
hM4Di	CNO	10	0.12	CSPlus	0.34641
hM4Di	Veh	12	0.5	CSPlus	0.707107
hM4Di	CNO	12	0.7	CSPlus	0.83666
mCherry	Veh	13	0.153846	CSPlus	0.392232
mCherry	CNO	13	0.16	CSPlus	0.4
mCherry	Veh	15	0.409091	CSPlus	0.639602
mCherry	CNO	15	0.243243	CSPlus	0.493197
hM4Di	Veh	16	0.307692	CSPlus	0.5547
hM4Di	CNO	16	0.5	CSPlus	0.707107
hM4Di	Veh	18	0.368421	CSPlus	0.606977
hM4Di	CNO	18	0.222222	CSPlus	0.471405
hM4Di	Veh	19	0.648649	CSPlus	0.805387
hM4Di	CNO	19	0.625	CSPlus	0.790569
hM4Di	Veh	20	0.114286	CSPlus	0.338062
hM4Di	CNO	20	0.128205	CSPlus	0.358057
hM4Di	Veh	21	0	CSPlus	0
hM4Di	CNO	21	0	CSPlus	0
mCherry	Veh	22	0.375	CSPlus	0.612372
mCherry	CNO	22	0.333333	CSPlus	0.57735
mCherry	Veh	23	0.183908	CSPlus	0.428845
mCherry	CNO	23	0.25	CSPlus	0.5
hM4Di	Veh	31	0.72093	CSPlus	0.849076
hM4Di	CNO	31	0.652174	CSPlus	0.807573
hM4Di	Veh	33	0.254237	CSPlus	0.504219
hM4Di	CNO	33	0.518519	CSPlus	0.720082
mCherry	Veh	34	0.5	CSPlus	0.707107
mCherry	CNO	34	0.333333	CSPlus	0.57735
mCherry	Veh	36	0.222222	CSPlus	0.471405
mCherry	CNO	36	0.3125	CSPlus	0.559017
mCherry	Veh	37	0.263158	CSPlus	0.512989
mCherry	CNO	37	0.333333	CSPlus	0.57735
mCherry	Veh	38	0.3	CSPlus	0.547723
mCherry	CNO	38	0.428571	CSPlus	0.654654
hM4Di	Veh	39	0.6875	CSPlus	0.829156
hM4Di	CNO	39	0.375	CSPlus	0.612372
hM4Di	Veh	40	0.380952	CSPlus	0.617213
hM4Di	CNO	40	0.181818	CSPlus	0.426401
hM4Di	Veh	41	0.47619	CSPlus	0.690066
hM4Di	CNO	41	0.166667	CSPlus	0.408248
hM4Di	Veh	51	0.428571	CSPlus	0.654654
hM4Di	CNO	51	0.363636	CSPlus	0.603023
hM4Di	Veh	52	0.18	CSPlus	0.424264
hM4Di	CNO	52	0.2	CSPlus	0.447214
hM4Di	Veh	53	0.363636	CSPlus	0.603023
hM4Di	CNO	53	0.777778	CSPlus	0.881917
mCherry	Veh	57	0.666667	CSPlus	0.816497
mCherry	CNO	57	0.428571	CSPlus	0.654654
mCherry	Veh	58	0.289474	CSPlus	0.538028
mCherry	CNO	58	0.52381	CSPlus	0.723747
mCherry	Veh	1	0.2	CSMinus	0.447214
mCherry	CNO	1	0.0285714	CSMinus	0.169031
hM4Di	Veh	3	0.217391	CSMinus	0.466252
hM4Di	CNO	3	0.25	CSMinus	0.5
hM4Di	Veh	4	0.375	CSMinus	0.612372
hM4Di	CNO	4	0.307692	CSMinus	0.5547
mCherry	Veh	5	0.227273	CSMinus	0.476731
mCherry	CNO	5	0.107143	CSMinus	0.327327
mCherry	Veh	6	0.45	CSMinus	0.67082
mCherry	CNO	6	0.37931	CSMinus	0.615882
hM4Di	Veh	7	0.2	CSMinus	0.447214
hM4Di	CNO	7	0.133333	CSMinus	0.365148
mCherry	Veh	9	0.352941	CSMinus	0.594089
mCherry	CNO	9	0.133333	CSMinus	0.365148
hM4Di	Veh	10	0.108696	CSMinus	0.32969
hM4Di	CNO	10	0.0882353	CSMinus	0.297044
hM4Di	Veh	12	0	CSMinus	0
hM4Di	CNO	12	0.25	CSMinus	0.5
mCherry	Veh	13	0.125	CSMinus	0.353553
mCherry	CNO	13		CSMinus
mCherry	Veh	15	0.171429	CSMinus	0.414039
mCherry	CNO	15	0.333333	CSMinus	0.57735
hM4Di	Veh	16	0.173913	CSMinus	0.417029
hM4Di	CNO	16	0.3	CSMinus	0.547723
hM4Di	Veh	18	0.384615	CSMinus	0.620174
hM4Di	CNO	18	0.0526316	CSMinus	0.229416
hM4Di	Veh	19	0.214286	CSMinus	0.46291
hM4Di	CNO	19	0.333333	CSMinus	0.57735
hM4Di	Veh	20	0.0740741	CSMinus	0.272166
hM4Di	CNO	20	0.030303	CSMinus	0.174078
hM4Di	Veh	21	0.5	CSMinus	0.707107
hM4Di	CNO	21	0.1	CSMinus	0.316228
mCherry	Veh	22	0.192308	CSMinus	0.438529
mCherry	CNO	22	0.323529	CSMinus	0.568796
mCherry	Veh	23	0.369565	CSMinus	0.607919
mCherry	CNO	23	0.0882353	CSMinus	0.297044
hM4Di	Veh	31	0.40625	CSMinus	0.637377
hM4Di	CNO	31	0.4	CSMinus	0.632456
hM4Di	Veh	33	0.0740741	CSMinus	0.272166
hM4Di	CNO	33	0	CSMinus	0
mCherry	Veh	34	0	CSMinus	0
mCherry	CNO	34	0.0833333	CSMinus	0.288675
mCherry	Veh	36	0.185185	CSMinus	0.430331
mCherry	CNO	36	0.333333	CSMinus	0.57735
mCherry	Veh	37	0.0769231	CSMinus	0.27735
mCherry	CNO	37	0	CSMinus	0
mCherry	Veh	38	0.0714286	CSMinus	0.267261
mCherry	CNO	38	0.214286	CSMinus	0.46291
hM4Di	Veh	39	0.25	CSMinus	0.5
hM4Di	CNO	39	0.047619	CSMinus	0.218218
hM4Di	Veh	40	0.0555556	CSMinus	0.235702
hM4Di	CNO	40	0.111111	CSMinus	0.333333
hM4Di	Veh	41	0.111111	CSMinus	0.333333
hM4Di	CNO	41	0.0769231	CSMinus	0.27735
hM4Di	Veh	51	0.333333	CSMinus	0.57735
hM4Di	CNO	51	0	CSMinus	0
hM4Di	Veh	52	0.0769231	CSMinus	0.27735
hM4Di	CNO	52	0.1	CSMinus	0.316228
hM4Di	Veh	53		CSMinus
hM4Di	CNO	53		CSMinus
mCherry	Veh	57		CSMinus
mCherry	CNO	57	0	CSMinus	0
mCherry	Veh	58	0.6	CSMinus	0.774597
mCherry	CNO	58	0.0714286	CSMinus	0.267261
mCherry	CNO	1	0.166667	Pre	0.408248
mCherry	Veh	1	0.24	Pre	0.489898
hM4Di	CNO	3	0	Pre	0
hM4Di	Veh	3	0.433333	Pre	0.658281
hM4Di	CNO	4	0	Pre	0
hM4Di	Veh	4	0.3125	Pre	0.559017
mCherry	CNO	5	0.227273	Pre	0.476731
mCherry	Veh	5	0.428571	Pre	0.654654
mCherry	CNO	6	0.266667	Pre	0.516398
mCherry	Veh	6	0.2	Pre	0.447214
hM4Di	CNO	7	0.242424	Pre	0.492366
hM4Di	Veh	7	0.3	Pre	0.547723
mCherry	CNO	9	0.0967742	Pre	0.311086
mCherry	Veh	9	0.103448	Pre	0.321634
hM4Di	CNO	10	0.163934	Pre	0.404888
hM4Di	Veh	10	0.133333	Pre	0.365148
hM4Di	CNO	12	0.277778	Pre	0.527046
hM4Di	Veh	12	0.4	Pre	0.632456
mCherry	CNO	13	0	Pre	0
mCherry	Veh	13	0.2	Pre	0.447214
mCherry	CNO	15	0.272727	Pre	0.522233
mCherry	Veh	15	0.53125	Pre	0.728869
hM4Di	CNO	16	0.5	Pre	0.707107
hM4Di	Veh	16	0.333333	Pre	0.57735
hM4Di	CNO	18	0.157895	Pre	0.39736
hM4Di	Veh	18	0.333333	Pre	0.57735
hM4Di	CNO	19	0.103448	Pre	0.321634
hM4Di	Veh	19	0.135417	Pre	0.36799
hM4Di	CNO	20	0.0754717	Pre	0.274721
hM4Di	Veh	20	0.285714	Pre	0.534522
hM4Di	CNO	21	0.2	Pre	0.447214
hM4Di	Veh	21	0.142857	Pre	0.377964
mCherry	CNO	22	0.258065	Pre	0.508001
mCherry	Veh	22	0.314286	Pre	0.560612
mCherry	CNO	23	0.0978261	Pre	0.312772
mCherry	Veh	23	0.11811	Pre	0.343672
hM4Di	CNO	31	0.26087	Pre	0.510754
hM4Di	Veh	31	0.294118	Pre	0.542326
hM4Di	CNO	33	0.116279	Pre	0.340997
hM4Di	Veh	33	0.295455	Pre	0.543557
mCherry	CNO	34	0.153846	Pre	0.392232
mCherry	Veh	34	0.25	Pre	0.5
mCherry	CNO	36	0.166667	Pre	0.408248
mCherry	Veh	36	0.5	Pre	0.707107
mCherry	CNO	37	0	Pre	0
mCherry	Veh	37	0	Pre	0
mCherry	CNO	38	0.266667	Pre	0.516398
mCherry	Veh	38	0.1	Pre	0.316228
hM4Di	CNO	39	0.075	Pre	0.273861
hM4Di	Veh	39	0.210526	Pre	0.458831
hM4Di	CNO	40	0.0540541	Pre	0.232495
hM4Di	Veh	40	0.294118	Pre	0.542326
hM4Di	CNO	41	0.166667	Pre	0.408248
hM4Di	Veh	41	0	Pre	0
hM4Di	CNO	51	0.153846	Pre	0.392232
hM4Di	Veh	51	0.125	Pre	0.353553
hM4Di	CNO	52	0.22449	Pre	0.473804
hM4Di	Veh	52	0.26087	Pre	0.510754
hM4Di	CNO	53	0	Pre	0
hM4Di	Veh	53	0	Pre	0
mCherry	CNO	57	0.181818	Pre	0.426401
mCherry	Veh	57	0.428571	Pre	0.654654
mCherry	CNO	58	0.0980392	Pre	0.313112
mCherry	Veh	58	0.121951	Pre	0.349215

## Sheet: Fig3_S1_CS-
Subject	Group	Sex	Bin	MagTimes	Opportunities
1	mCherry	F	-30	0	13
1	mCherry	F	-29.9	0	13
1	mCherry	F	-29.8	0	13
1	mCherry	F	-29.7	0	13
1	mCherry	F	-29.6	0	13
1	mCherry	F	-29.5	0	13
1	mCherry	F	-29.4	0	13
1	mCherry	F	-29.3	0	13
1	mCherry	F	-29.2	0	13
1	mCherry	F	-29.1	0	13
1	mCherry	F	-29	0	13
1	mCherry	F	-28.9	0	13
1	mCherry	F	-28.8	0	13
1	mCherry	F	-28.7	0	13
1	mCherry	F	-28.6	0	13
1	mCherry	F	-28.5	0	13
1	mCherry	F	-28.4	0	13
1	mCherry	F	-28.3	0	13
1	mCherry	F	-28.2	0	13
1	mCherry	F	-28.1	0	13
1	mCherry	F	-28	0	13
1	mCherry	F	-27.9	0	13
1	mCherry	F	-27.8	0	13
1	mCherry	F	-27.7	0	13
1	mCherry	F	-27.6	0	13
1	mCherry	F	-27.5	0	13
1	mCherry	F	-27.4	0	13
1	mCherry	F	-27.3	0	13
1	mCherry	F	-27.2	0	13
1	mCherry	F	-27.1	0	13
1	mCherry	F	-27	0	13
1	mCherry	F	-26.9	0	13
1	mCherry	F	-26.8	0	13
1	mCherry	F	-26.7	0	13
1	mCherry	F	-26.6	0	13
1	mCherry	F	-26.5	0	13
1	mCherry	F	-26.4	0	13
1	mCherry	F	-26.3	0	13
1	mCherry	F	-26.2	0	13
1	mCherry	F	-26.1	0	13
1	mCherry	F	-26	0	13
1	mCherry	F	-25.9	0	13
1	mCherry	F	-25.8	0	13
1	mCherry	F	-25.7	0	13
1	mCherry	F	-25.6	0	13
1	mCherry	F	-25.5	0	13
1	mCherry	F	-25.4	0	13
1	mCherry	F	-25.3	0	13
1	mCherry	F	-25.2	0	13
1	mCherry	F	-25.1	0	13
1	mCherry	F	-25	0	13
1	mCherry	F	-24.9	0	13
1	mCherry	F	-24.8	0	13
1	mCherry	F	-24.7	0	13
1	mCherry	F	-24.6	0	13
1	mCherry	F	-24.5	0	13
1	mCherry	F	-24.4	0	13
1	mCherry	F	-24.3	0	13
1	mCherry	F	-24.2	0	13
1	mCherry	F	-24.1	0	13
1	mCherry	F	-24	0	13
1	mCherry	F	-23.9	0	13
1	mCherry	F	-23.8	0	13
1	mCherry	F	-23.7	0	13
1	mCherry	F	-23.6	0	13
1	mCherry	F	-23.5	0	13
1	mCherry	F	-23.4	0	13
1	mCherry	F	-23.3	0	13
1	mCherry	F	-23.2	0	13
1	mCherry	F	-23.1	0	13
1	mCherry	F	-23	0	13
1	mCherry	F	-22.9	0	13
1	mCherry	F	-22.8	0	13
1	mCherry	F	-22.7	0	14
1	mCherry	F	-22.6	0	14
1	mCherry	F	-22.5	0	14
1	mCherry	F	-22.4	0	14
1	mCherry	F	-22.3	0	14
1	mCherry	F	-22.2	0	14
1	mCherry	F	-22.1	0	14
1	mCherry	F	-22	0	14
1	mCherry	F	-21.9	0	14
1	mCherry	F	-21.8	0	14
1	mCherry	F	-21.7	0	14
1	mCherry	F	-21.6	0	14
1	mCherry	F	-21.5	0	14
1	mCherry	F	-21.4	0	14
1	mCherry	F	-21.3	0	14
1	mCherry	F	-21.2	0	14
1	mCherry	F	-21.1	0	14
1	mCherry	F	-21	0	14
1	mCherry	F	-20.9	0	14
1	mCherry	F	-20.8	0	14
1	mCherry	F	-20.7	0	14
1	mCherry	F	-20.6	1	14
1	mCherry	F	-20.5	0	14
1	mCherry	F	-20.4	0	14
1	mCherry	F	-20.3	0	14
1	mCherry	F	-20.2	0	14
1	mCherry	F	-20.1	0	14
1	mCherry	F	-20	0	14
1	mCherry	F	-19.9	0	14
1	mCherry	F	-19.8	0	14
1	mCherry	F	-19.7	0	14
1	mCherry	F	-19.6	0	14
1	mCherry	F	-19.5	1	14
1	mCherry	F	-19.4	0	14
1	mCherry	F	-19.3	1	14
1	mCherry	F	-19.2	0	14
1	mCherry	F	-19.1	0	14
1	mCherry	F	-19	0	14
1	mCherry	F	-18.9	0	14
1	mCherry	F	-18.8	0	14
1	mCherry	F	-18.7	0	14
1	mCherry	F	-18.6	0	14
1	mCherry	F	-18.5	0	14
1	mCherry	F	-18.4	0	14
1	mCherry	F	-18.3	0	14
1	mCherry	F	-18.2	0	14
1	mCherry	F	-18.1	1	14
1	mCherry	F	-18	0	14
1	mCherry	F	-17.9	0	14
1	mCherry	F	-17.8	0	14
1	mCherry	F	-17.7	0	14
1	mCherry	F	-17.6	0	14
1	mCherry	F	-17.5	0	14
1	mCherry	F	-17.4	0	14
1	mCherry	F	-17.3	0	14
1	mCherry	F	-17.2	0	14
1	mCherry	F	-17.1	0	14
1	mCherry	F	-17	0	14
1	mCherry	F	-16.9	0	14
1	mCherry	F	-16.8	0	14
1	mCherry	F	-16.7	0	14
1	mCherry	F	-16.6	0	14
1	mCherry	F	-16.5	0	14
1	mCherry	F	-16.4	0	14
1	mCherry	F	-16.3	0	14
1	mCherry	F	-16.2	0	14
1	mCherry	F	-16.1	0	14
1	mCherry	F	-16	0	14
1	mCherry	F	-15.9	0	14
1	mCherry	F	-15.8	0	14
1	mCherry	F	-15.7	0	14
1	mCherry	F	-15.6	0	14
1	mCherry	F	-15.5	0	14
1	mCherry	F	-15.4	0	14
1	mCherry	F	-15.3	0	14
1	mCherry	F	-15.2	0	14
1	mCherry	F	-15.1	0	14
1	mCherry	F	-15	0	15
1	mCherry	F	-14.9	0	15
1	mCherry	F	-14.8	0	15
1	mCherry	F	-14.7	0	15
1	mCherry	F	-14.6	0	15
1	mCherry	F	-14.5	0	15
1	mCherry	F	-14.4	0	15
1	mCherry	F	-14.3	0	15
1	mCherry	F	-14.2	0	15
1	mCherry	F	-14.1	0	15
1	mCherry	F	-14	0	15
1	mCherry	F	-13.9	0	15
1	mCherry	F	-13.8	0	15
1	mCherry	F	-13.7	0	15
1	mCherry	F	-13.6	0	15
1	mCherry	F	-13.5	0	15
1	mCherry	F	-13.4	0	15
1	mCherry	F	-13.3	0	15
1	mCherry	F	-13.2	0	15
1	mCherry	F	-13.1	0	15
1	mCherry	F	-13	0	15
1	mCherry	F	-12.9	0	15
1	mCherry	F	-12.8	0	15
1	mCherry	F	-12.7	0	16
1	mCherry	F	-12.6	0	16
1	mCherry	F	-12.5	0	16
1	mCherry	F	-12.4	0	16
1	mCherry	F	-12.3	0	16
1	mCherry	F	-12.2	0	16
1	mCherry	F	-12.1	0	16
1	mCherry	F	-12	0	16
1	mCherry	F	-11.9	0	16
1	mCherry	F	-11.8	0	16
1	mCherry	F	-11.7	0	16
1	mCherry	F	-11.6	0	16
1	mCherry	F	-11.5	0	16
1	mCherry	F	-11.4	0	16
1	mCherry	F	-11.3	0	16
1	mCherry	F	-11.2	0	16
1	mCherry	F	-11.1	0	16
1	mCherry	F	-11	0	16
1	mCherry	F	-10.9	0	16
1	mCherry	F	-10.8	0	16
1	mCherry	F	-10.7	0	16
1	mCherry	F	-10.6	0	16
1	mCherry	F	-10.5	0	16
1	mCherry	F	-10.4	0	16
1	mCherry	F	-10.3	0	16
1	mCherry	F	-10.2	0	16
1	mCherry	F	-10.1	0	16
1	mCherry	F	-10	0	16
1	mCherry	F	-9.9	0	16
1	mCherry	F	-9.8	0	16
1	mCherry	F	-9.7	0	16
1	mCherry	F	-9.6	0	16
1	mCherry	F	-9.5	0	16
1	mCherry	F	-9.4	0	16
1	mCherry	F	-9.3	0	16
1	mCherry	F	-9.2	0	16
1	mCherry	F	-9.1	0	16
1	mCherry	F	-9	0	16
1	mCherry	F	-8.9	0	16
1	mCherry	F	-8.8	0	16
1	mCherry	F	-8.7	0	16
1	mCherry	F	-8.6	0	16
1	mCherry	F	-8.5	0	16
1	mCherry	F	-8.4	0	16
1	mCherry	F	-8.3	0	16
1	mCherry	F	-8.2	0	16
1	mCherry	F	-8.1	0	16
1	mCherry	F	-8	0	16
1	mCherry	F	-7.9	0	16
1	mCherry	F	-7.8	0	16
1	mCherry	F	-7.7	0	16
1	mCherry	F	-7.6	0	16
1	mCherry	F	-7.5	0	16
1	mCherry	F	-7.4	0	16
1	mCherry	F	-7.3	0	16
1	mCherry	F	-7.2	0	16
1	mCherry	F	-7.1	0	16
1	mCherry	F	-7	0	16
1	mCherry	F	-6.9	0	16
1	mCherry	F	-6.8	0	16
1	mCherry	F	-6.7	0	16
1	mCherry	F	-6.6	0	17
1	mCherry	F	-6.5	0	17
1	mCherry	F	-6.4	0	17
1	mCherry	F	-6.3	0	17
1	mCherry	F	-6.2	0	17
1	mCherry	F	-6.1	0	17
1	mCherry	F	-6	0	17
1	mCherry	F	-5.9	0	17
1	mCherry	F	-5.8	0	17
1	mCherry	F	-5.7	0	17
1	mCherry	F	-5.6	0	17
1	mCherry	F	-5.5	0	17
1	mCherry	F	-5.4	0	17
1	mCherry	F	-5.3	0	17
1	mCherry	F	-5.2	0	17
1	mCherry	F	-5.1	0	17
1	mCherry	F	-5	0	18
1	mCherry	F	-4.9	0	18
1	mCherry	F	-4.8	0	18
1	mCherry	F	-4.7	0	19
1	mCherry	F	-4.6	0	19
1	mCherry	F	-4.5	1	19
1	mCherry	F	-4.4	0	19
1	mCherry	F	-4.3	0	19
1	mCherry	F	-4.2	0	19
1	mCherry	F	-4.1	0	19
1	mCherry	F	-4	0	19
1	mCherry	F	-3.9	0	19
1	mCherry	F	-3.8	0	19
1	mCherry	F	-3.7	0	19
1	mCherry	F	-3.6	0	19
1	mCherry	F	-3.5	0	19
1	mCherry	F	-3.4	1	19
1	mCherry	F	-3.3	0	19
1	mCherry	F	-3.2	0	19
1	mCherry	F	-3.1	0	19
1	mCherry	F	-3	0	19
1	mCherry	F	-2.9	0	19
1	mCherry	F	-2.8	0	19
1	mCherry	F	-2.7	0	19
1	mCherry	F	-2.6	0	19
1	mCherry	F	-2.5	0	19
1	mCherry	F	-2.4	0	19
1	mCherry	F	-2.3	0	19
1	mCherry	F	-2.2	0	19
1	mCherry	F	-2.1	1	19
1	mCherry	F	-2	0	19
1	mCherry	F	-1.9	0	19
1	mCherry	F	-1.8	0	19
1	mCherry	F	-1.7	0	19
1	mCherry	F	-1.6	1	19
1	mCherry	F	-1.5	0	19
1	mCherry	F	-1.4	0	19
1	mCherry	F	-1.3	0	19
1	mCherry	F	-1.2	0	19
1	mCherry	F	-1.1	0	19
1	mCherry	F	-1	0	19
1	mCherry	F	-0.9	0	19
1	mCherry	F	-0.8	0	19
1	mCherry	F	-0.7	0	19
1	mCherry	F	-0.6	0	20
1	mCherry	F	-0.5	0	20
1	mCherry	F	-0.4	0	20
1	mCherry	F	-0.3	0	20
1	mCherry	F	-0.2	0	20
1	mCherry	F	-0.1	0	20
1	mCherry	F	0	0	20
1	mCherry	F	0.1	0	20
1	mCherry	F	0.2	0	20
1	mCherry	F	0.3	0	20
1	mCherry	F	0.4	0	20
1	mCherry	F	0.5	0	20
1	mCherry	F	0.6	0	20
1	mCherry	F	0.7	1	20
1	mCherry	F	0.8	0	20
1	mCherry	F	0.9	0	20
1	mCherry	F	1	1	20
1	mCherry	F	1.1	0	20
1	mCherry	F	1.2	0	20
1	mCherry	F	1.3	0	20
1	mCherry	F	1.4	1	20
1	mCherry	F	1.5	1	20
1	mCherry	F	1.6	0	20
1	mCherry	F	1.7	0	20
1	mCherry	F	1.8	3	20
1	mCherry	F	1.9	1	20
1	mCherry	F	2	0	20
1	mCherry	F	2.1	2	20
1	mCherry	F	2.2	0	20
1	mCherry	F	2.3	1	20
1	mCherry	F	2.4	1	20
1	mCherry	F	2.5	0	20
1	mCherry	F	2.6	1	20
1	mCherry	F	2.7	1	20
1	mCherry	F	2.8	0	20
1	mCherry	F	2.9	0	20
1	mCherry	F	3	0	20
1	mCherry	F	3.1	1	20
1	mCherry	F	3.2	0	20
1	mCherry	F	3.3	0	20
1	mCherry	F	3.4	1	20
1	mCherry	F	3.5	0	20
1	mCherry	F	3.6	0	20
1	mCherry	F	3.7	0	20
1	mCherry	F	3.8	0	20
1	mCherry	F	3.9	0	20
1	mCherry	F	4	1	20
1	mCherry	F	4.1	0	20
1	mCherry	F	4.2	0	20
1	mCherry	F	4.3	0	20
1	mCherry	F	4.4	0	20
1	mCherry	F	4.5	0	20
1	mCherry	F	4.6	0	20
1	mCherry	F	4.7	0	20
1	mCherry	F	4.8	0	20
1	mCherry	F	4.9	0	20
1	mCherry	F	5	0	20
1	mCherry	F	5.1	0	20
1	mCherry	F	5.2	0	20
1	mCherry	F	5.3	0	20
1	mCherry	F	5.4	0	20
1	mCherry	F	5.5	0	20
1	mCherry	F	5.6	0	20
1	mCherry	F	5.7	0	20
1	mCherry	F	5.8	0	20
1	mCherry	F	5.9	0	20
1	mCherry	F	6	0	20
1	mCherry	F	6.1	0	20
1	mCherry	F	6.2	0	20
1	mCherry	F	6.3	0	20
1	mCherry	F	6.4	0	20
1	mCherry	F	6.5	1	20
1	mCherry	F	6.6	0	20
1	mCherry	F	6.7	1	20
1	mCherry	F	6.8	1	20
1	mCherry	F	6.9	0	20
1	mCherry	F	7	0	20
1	mCherry	F	7.1	1	20
1	mCherry	F	7.2	0	20
1	mCherry	F	7.3	0	20
1	mCherry	F	7.4	0	20
1	mCherry	F	7.5	0	20
1	mCherry	F	7.6	0	20
1	mCherry	F	7.7	0	20
1	mCherry	F	7.8	0	20
1	mCherry	F	7.9	0	20
1	mCherry	F	8	0	20
1	mCherry	F	8.1	0	19
1	mCherry	F	8.2	0	19
1	mCherry	F	8.3	1	19
1	mCherry	F	8.4	0	19
1	mCherry	F	8.5	0	19
1	mCherry	F	8.6	0	19
1	mCherry	F	8.7	0	19
1	mCherry	F	8.8	0	19
1	mCherry	F	8.9	0	19
1	mCherry	F	9	0	19
1	mCherry	F	9.1	0	19
1	mCherry	F	9.2	0	19
1	mCherry	F	9.3	0	19
1	mCherry	F	9.4	0	19
1	mCherry	F	9.5	0	19
1	mCherry	F	9.6	0	19
1	mCherry	F	9.7	0	19
1	mCherry	F	9.8	0	19
1	mCherry	F	9.9	0	19
1	mCherry	F	10	0	19
1	mCherry	F	10.1	0	19
1	mCherry	F	10.2	0	19
1	mCherry	F	10.3	0	19
1	mCherry	F	10.4	0	19
1	mCherry	F	10.5	0	19
1	mCherry	F	10.6	0	19
1	mCherry	F	10.7	0	19
1	mCherry	F	10.8	0	19
1	mCherry	F	10.9	0	19
1	mCherry	F	11	0	19
1	mCherry	F	11.1	0	19
1	mCherry	F	11.2	0	19
1	mCherry	F	11.3	0	19
1	mCherry	F	11.4	0	19
1	mCherry	F	11.5	0	19
1	mCherry	F	11.6	0	19
1	mCherry	F	11.7	0	19
1	mCherry	F	11.8	0	19
1	mCherry	F	11.9	0	19
1	mCherry	F	12	0	19
1	mCherry	F	12.1	0	19
1	mCherry	F	12.2	0	19
1	mCherry	F	12.3	0	19
1	mCherry	F	12.4	0	19
1	mCherry	F	12.5	0	19
1	mCherry	F	12.6	0	19
1	mCherry	F	12.7	0	19
1	mCherry	F	12.8	0	19
1	mCherry	F	12.9	0	19
1	mCherry	F	13	0	19
1	mCherry	F	13.1	0	19
1	mCherry	F	13.2	0	19
1	mCherry	F	13.3	0	19
1	mCherry	F	13.4	0	19
1	mCherry	F	13.5	0	19
1	mCherry	F	13.6	0	19
1	mCherry	F	13.7	0	19
1	mCherry	F	13.8	0	19
1	mCherry	F	13.9	0	19
1	mCherry	F	14	0	19
1	mCherry	F	14.1	0	19
1	mCherry	F	14.2	0	19
1	mCherry	F	14.3	0	19
1	mCherry	F	14.4	0	19
1	mCherry	F	14.5	0	19
1	mCherry	F	14.6	0	19
1	mCherry	F	14.7	0	19
1	mCherry	F	14.8	0	19
1	mCherry	F	14.9	0	19
1	mCherry	F	15	0	19
1	mCherry	F	15.1	0	19
1	mCherry	F	15.2	0	19
1	mCherry	F	15.3	0	19
1	mCherry	F	15.4	0	19
1	mCherry	F	15.5	0	19
1	mCherry	F	15.6	0	19
1	mCherry	F	15.7	0	19
1	mCherry	F	15.8	0	19
1	mCherry	F	15.9	0	19
1	mCherry	F	16	0	19
1	mCherry	F	16.1	0	19
1	mCherry	F	16.2	0	19
1	mCherry	F	16.3	0	19
1	mCherry	F	16.4	0	19
1	mCherry	F	16.5	0	19
1	mCherry	F	16.6	0	19
1	mCherry	F	16.7	0	19
1	mCherry	F	16.8	0	19
1	mCherry	F	16.9	0	19
1	mCherry	F	17	0	19
1	mCherry	F	17.1	0	19
1	mCherry	F	17.2	0	19
1	mCherry	F	17.3	0	19
1	mCherry	F	17.4	0	19
1	mCherry	F	17.5	0	19
1	mCherry	F	17.6	0	19
1	mCherry	F	17.7	0	19
1	mCherry	F	17.8	0	19
1	mCherry	F	17.9	0	19
1	mCherry	F	18	0	19
1	mCherry	F	18.1	0	19
1	mCherry	F	18.2	0	19
1	mCherry	F	18.3	0	19
1	mCherry	F	18.4	0	19
1	mCherry	F	18.5	1	19
1	mCherry	F	18.6	0	19
1	mCherry	F	18.7	0	19
1	mCherry	F	18.8	0	19
1	mCherry	F	18.9	0	19
1	mCherry	F	19	1	19
1	mCherry	F	19.1	0	19
1	mCherry	F	19.2	1	19
1	mCherry	F	19.3	0	19
1	mCherry	F	19.4	0	19
1	mCherry	F	19.5	0	19
1	mCherry	F	19.6	0	19
1	mCherry	F	19.7	0	19
1	mCherry	F	19.8	1	19
1	mCherry	F	19.9	0	19
1	mCherry	F	20	0	19
1	mCherry	F	20.1	0	19
1	mCherry	F	20.2	0	19
1	mCherry	F	20.3	0	19
1	mCherry	F	20.4	0	19
1	mCherry	F	20.5	0	19
1	mCherry	F	20.6	0	19
1	mCherry	F	20.7	0	19
1	mCherry	F	20.8	0	19
1	mCherry	F	20.9	0	19
1	mCherry	F	21	0	19
1	mCherry	F	21.1	0	19
1	mCherry	F	21.2	0	19
1	mCherry	F	21.3	0	19
1	mCherry	F	21.4	0	19
1	mCherry	F	21.5	0	19
1	mCherry	F	21.6	0	19
1	mCherry	F	21.7	0	19
1	mCherry	F	21.8	0	19
1	mCherry	F	21.9	0	19
1	mCherry	F	22	0	19
1	mCherry	F	22.1	0	19
1	mCherry	F	22.2	0	19
1	mCherry	F	22.3	0	19
1	mCherry	F	22.4	0	19
1	mCherry	F	22.5	0	19
1	mCherry	F	22.6	0	19
1	mCherry	F	22.7	0	19
1	mCherry	F	22.8	0	19
1	mCherry	F	22.9	0	19
1	mCherry	F	23	0	19
1	mCherry	F	23.1	0	19
1	mCherry	F	23.2	0	19
1	mCherry	F	23.3	0	19
1	mCherry	F	23.4	0	19
1	mCherry	F	23.5	0	19
1	mCherry	F	23.6	0	19
1	mCherry	F	23.7	0	19
1	mCherry	F	23.8	0	19
1	mCherry	F	23.9	0	19
1	mCherry	F	24	0	19
1	mCherry	F	24.1	0	19
1	mCherry	F	24.2	0	19
1	mCherry	F	24.3	0	19
1	mCherry	F	24.4	0	19
1	mCherry	F	24.5	0	19
1	mCherry	F	24.6	0	19
1	mCherry	F	24.7	0	19
1	mCherry	F	24.8	0	19
1	mCherry	F	24.9	0	19
1	mCherry	F	25	0	19
1	mCherry	F	25.1	0	19
1	mCherry	F	25.2	0	19
1	mCherry	F	25.3	0	19
1	mCherry	F	25.4	0	19
1	mCherry	F	25.5	0	19
1	mCherry	F	25.6	0	19
1	mCherry	F	25.7	0	19
1	mCherry	F	25.8	0	19
1	mCherry	F	25.9	0	19
1	mCherry	F	26	0	19
1	mCherry	F	26.1	0	19
1	mCherry	F	26.2	0	19
1	mCherry	F	26.3	0	19
1	mCherry	F	26.4	0	19
1	mCherry	F	26.5	0	19
1	mCherry	F	26.6	0	19
1	mCherry	F	26.7	0	19
1	mCherry	F	26.8	0	19
1	mCherry	F	26.9	0	18
1	mCherry	F	27	0	18
1	mCherry	F	27.1	0	18
1	mCherry	F	27.2	0	18
1	mCherry	F	27.3	0	18
1	mCherry	F	27.4	0	18
1	mCherry	F	27.5	0	18
1	mCherry	F	27.6	0	18
1	mCherry	F	27.7	0	18
1	mCherry	F	27.8	0	18
1	mCherry	F	27.9	0	18
1	mCherry	F	28	0	18
1	mCherry	F	28.1	0	18
1	mCherry	F	28.2	0	18
1	mCherry	F	28.3	0	18
1	mCherry	F	28.4	0	18
1	mCherry	F	28.5	0	18
1	mCherry	F	28.6	0	18
1	mCherry	F	28.7	0	18
1	mCherry	F	28.8	0	18
1	mCherry	F	28.9	0	18
1	mCherry	F	29	0	18
1	mCherry	F	29.1	0	18
1	mCherry	F	29.2	0	18
1	mCherry	F	29.3	0	18
1	mCherry	F	29.4	0	18
1	mCherry	F	29.5	0	18
1	mCherry	F	29.6	0	18
1	mCherry	F	29.7	0	18
1	mCherry	F	29.8	0	18
1	mCherry	F	29.9	0	18
1	mCherry	F	30	0	13
3	hM4Di	F	-30	0	16
3	hM4Di	F	-29.9	0	16
3	hM4Di	F	-29.8	0	16
3	hM4Di	F	-29.7	0	16
3	hM4Di	F	-29.6	0	16
3	hM4Di	F	-29.5	0	16
3	hM4Di	F	-29.4	0	16
3	hM4Di	F	-29.3	0	16
3	hM4Di	F	-29.2	0	16
3	hM4Di	F	-29.1	0	16
3	hM4Di	F	-29	0	16
3	hM4Di	F	-28.9	0	16
3	hM4Di	F	-28.8	0	16
3	hM4Di	F	-28.7	0	16
3	hM4Di	F	-28.6	0	16
3	hM4Di	F	-28.5	0	16
3	hM4Di	F	-28.4	1	16
3	hM4Di	F	-28.3	0	16
3	hM4Di	F	-28.2	0	16
3	hM4Di	F	-28.1	0	16
3	hM4Di	F	-28	0	16
3	hM4Di	F	-27.9	0	16
3	hM4Di	F	-27.8	1	16
3	hM4Di	F	-27.7	0	16
3	hM4Di	F	-27.6	0	16
3	hM4Di	F	-27.5	0	16
3	hM4Di	F	-27.4	0	16
3	hM4Di	F	-27.3	0	16
3	hM4Di	F	-27.2	0	16
3	hM4Di	F	-27.1	0	16
3	hM4Di	F	-27	1	16
3	hM4Di	F	-26.9	0	16
3	hM4Di	F	-26.8	0	16
3	hM4Di	F	-26.7	0	16
3	hM4Di	F	-26.6	0	16
3	hM4Di	F	-26.5	0	16
3	hM4Di	F	-26.4	0	16
3	hM4Di	F	-26.3	1	16
3	hM4Di	F	-26.2	2	16
3	hM4Di	F	-26.1	2	16
3	hM4Di	F	-26	0	16
3	hM4Di	F	-25.9	0	16
3	hM4Di	F	-25.8	0	16
3	hM4Di	F	-25.7	0	16
3	hM4Di	F	-25.6	1	16
3	hM4Di	F	-25.5	0	16
3	hM4Di	F	-25.4	0	16
3	hM4Di	F	-25.3	0	16
3	hM4Di	F	-25.2	0	16
3	hM4Di	F	-25.1	1	16
3	hM4Di	F	-25	2	16
3	hM4Di	F	-24.9	0	16
3	hM4Di	F	-24.8	0	16
3	hM4Di	F	-24.7	0	16
3	hM4Di	F	-24.6	1	16
3	hM4Di	F	-24.5	0	16
3	hM4Di	F	-24.4	0	16
3	hM4Di	F	-24.3	1	16
3	hM4Di	F	-24.2	0	16
3	hM4Di	F	-24.1	0	16
3	hM4Di	F	-24	0	16
3	hM4Di	F	-23.9	0	16
3	hM4Di	F	-23.8	0	16
3	hM4Di	F	-23.7	0	16
3	hM4Di	F	-23.6	0	16
3	hM4Di	F	-23.5	0	16
3	hM4Di	F	-23.4	0	16
3	hM4Di	F	-23.3	0	16
3	hM4Di	F	-23.2	0	16
3	hM4Di	F	-23.1	0	16
3	hM4Di	F	-23	0	16
3	hM4Di	F	-22.9	0	16
3	hM4Di	F	-22.8	0	16
3	hM4Di	F	-22.7	0	16
3	hM4Di	F	-22.6	0	16
3	hM4Di	F	-22.5	0	16
3	hM4Di	F	-22.4	0	16
3	hM4Di	F	-22.3	0	16
3	hM4Di	F	-22.2	0	16
3	hM4Di	F	-22.1	0	16
3	hM4Di	F	-22	0	16
3	hM4Di	F	-21.9	0	16
3	hM4Di	F	-21.8	0	16
3	hM4Di	F	-21.7	0	16
3	hM4Di	F	-21.6	0	16
3	hM4Di	F	-21.5	0	16
3	hM4Di	F	-21.4	0	16
3	hM4Di	F	-21.3	0	16
3	hM4Di	F	-21.2	1	16
3	hM4Di	F	-21.1	0	16
3	hM4Di	F	-21	1	16
3	hM4Di	F	-20.9	0	16
3	hM4Di	F	-20.8	0	16
3	hM4Di	F	-20.7	0	16
3	hM4Di	F	-20.6	0	16
3	hM4Di	F	-20.5	0	16
3	hM4Di	F	-20.4	0	16
3	hM4Di	F	-20.3	1	16
3	hM4Di	F	-20.2	1	16
3	hM4Di	F	-20.1	1	16
3	hM4Di	F	-20	1	16
3	hM4Di	F	-19.9	0	16
3	hM4Di	F	-19.8	0	16
3	hM4Di	F	-19.7	1	16
3	hM4Di	F	-19.6	0	17
3	hM4Di	F	-19.5	0	17
3	hM4Di	F	-19.4	0	17
3	hM4Di	F	-19.3	1	17
3	hM4Di	F	-19.2	0	17
3	hM4Di	F	-19.1	0	17
3	hM4Di	F	-19	0	17
3	hM4Di	F	-18.9	0	17
3	hM4Di	F	-18.8	0	17
3	hM4Di	F	-18.7	0	17
3	hM4Di	F	-18.6	1	17
3	hM4Di	F	-18.5	0	17
3	hM4Di	F	-18.4	0	17
3	hM4Di	F	-18.3	0	17
3	hM4Di	F	-18.2	0	17
3	hM4Di	F	-18.1	0	17
3	hM4Di	F	-18	0	17
3	hM4Di	F	-17.9	0	17
3	hM4Di	F	-17.8	0	17
3	hM4Di	F	-17.7	0	17
3	hM4Di	F	-17.6	0	17
3	hM4Di	F	-17.5	0	17
3	hM4Di	F	-17.4	0	17
3	hM4Di	F	-17.3	0	17
3	hM4Di	F	-17.2	0	18
3	hM4Di	F	-17.1	1	18
3	hM4Di	F	-17	0	18
3	hM4Di	F	-16.9	1	18
3	hM4Di	F	-16.8	0	19
3	hM4Di	F	-16.7	0	19
3	hM4Di	F	-16.6	0	19
3	hM4Di	F	-16.5	0	19
3	hM4Di	F	-16.4	0	19
3	hM4Di	F	-16.3	0	19
3	hM4Di	F	-16.2	1	19
3	hM4Di	F	-16.1	0	19
3	hM4Di	F	-16	0	19
3	hM4Di	F	-15.9	0	19
3	hM4Di	F	-15.8	0	19
3	hM4Di	F	-15.7	0	19
3	hM4Di	F	-15.6	0	19
3	hM4Di	F	-15.5	0	19
3	hM4Di	F	-15.4	0	19
3	hM4Di	F	-15.3	0	19
3	hM4Di	F	-15.2	0	19
3	hM4Di	F	-15.1	0	19
3	hM4Di	F	-15	0	19
3	hM4Di	F	-14.9	0	19
3	hM4Di	F	-14.8	0	19
3	hM4Di	F	-14.7	0	19
3	hM4Di	F	-14.6	0	19
3	hM4Di	F	-14.5	0	19
3	hM4Di	F	-14.4	0	19
3	hM4Di	F	-14.3	0	19
3	hM4Di	F	-14.2	0	19
3	hM4Di	F	-14.1	0	19
3	hM4Di	F	-14	0	19
3	hM4Di	F	-13.9	0	19
3	hM4Di	F	-13.8	0	19
3	hM4Di	F	-13.7	1	19
3	hM4Di	F	-13.6	0	19
3	hM4Di	F	-13.5	0	19
3	hM4Di	F	-13.4	1	19
3	hM4Di	F	-13.3	0	19
3	hM4Di	F	-13.2	0	19
3	hM4Di	F	-13.1	0	19
3	hM4Di	F	-13	0	19
3	hM4Di	F	-12.9	0	19
3	hM4Di	F	-12.8	0	19
3	hM4Di	F	-12.7	0	19
3	hM4Di	F	-12.6	0	19
3	hM4Di	F	-12.5	0	19
3	hM4Di	F	-12.4	0	19
3	hM4Di	F	-12.3	0	19
3	hM4Di	F	-12.2	1	19
3	hM4Di	F	-12.1	0	19
3	hM4Di	F	-12	0	19
3	hM4Di	F	-11.9	0	19
3	hM4Di	F	-11.8	0	19
3	hM4Di	F	-11.7	0	19
3	hM4Di	F	-11.6	0	20
3	hM4Di	F	-11.5	0	20
3	hM4Di	F	-11.4	0	20
3	hM4Di	F	-11.3	1	20
3	hM4Di	F	-11.2	0	20
3	hM4Di	F	-11.1	1	20
3	hM4Di	F	-11	0	20
3	hM4Di	F	-10.9	0	20
3	hM4Di	F	-10.8	0	20
3	hM4Di	F	-10.7	0	20
3	hM4Di	F	-10.6	0	20
3	hM4Di	F	-10.5	1	20
3	hM4Di	F	-10.4	1	20
3	hM4Di	F	-10.3	1	20
3	hM4Di	F	-10.2	0	20
3	hM4Di	F	-10.1	0	20
3	hM4Di	F	-10	0	20
3	hM4Di	F	-9.9	0	21
3	hM4Di	F	-9.8	0	21
3	hM4Di	F	-9.7	0	21
3	hM4Di	F	-9.6	0	21
3	hM4Di	F	-9.5	0	21
3	hM4Di	F	-9.4	0	21
3	hM4Di	F	-9.3	1	21
3	hM4Di	F	-9.2	0	21
3	hM4Di	F	-9.1	0	21
3	hM4Di	F	-9	0	21
3	hM4Di	F	-8.9	0	21
3	hM4Di	F	-8.8	0	21
3	hM4Di	F	-8.7	0	21
3	hM4Di	F	-8.6	0	21
3	hM4Di	F	-8.5	0	21
3	hM4Di	F	-8.4	0	21
3	hM4Di	F	-8.3	0	21
3	hM4Di	F	-8.2	0	21
3	hM4Di	F	-8.1	0	21
3	hM4Di	F	-8	0	22
3	hM4Di	F	-7.9	0	22
3	hM4Di	F	-7.8	0	22
3	hM4Di	F	-7.7	0	22
3	hM4Di	F	-7.6	0	22
3	hM4Di	F	-7.5	0	22
3	hM4Di	F	-7.4	1	22
3	hM4Di	F	-7.3	0	22
3	hM4Di	F	-7.2	1	22
3	hM4Di	F	-7.1	0	22
3	hM4Di	F	-7	1	22
3	hM4Di	F	-6.9	0	22
3	hM4Di	F	-6.8	0	22
3	hM4Di	F	-6.7	0	22
3	hM4Di	F	-6.6	0	22
3	hM4Di	F	-6.5	0	22
3	hM4Di	F	-6.4	0	22
3	hM4Di	F	-6.3	0	23
3	hM4Di	F	-6.2	0	23
3	hM4Di	F	-6.1	0	23
3	hM4Di	F	-6	0	23
3	hM4Di	F	-5.9	1	23
3	hM4Di	F	-5.8	0	23
3	hM4Di	F	-5.7	0	23
3	hM4Di	F	-5.6	0	23
3	hM4Di	F	-5.5	0	23
3	hM4Di	F	-5.4	0	23
3	hM4Di	F	-5.3	0	23
3	hM4Di	F	-5.2	0	23
3	hM4Di	F	-5.1	0	23
3	hM4Di	F	-5	0	23
3	hM4Di	F	-4.9	0	23
3	hM4Di	F	-4.8	0	23
3	hM4Di	F	-4.7	1	23
3	hM4Di	F	-4.6	1	23
3	hM4Di	F	-4.5	0	23
3	hM4Di	F	-4.4	0	23
3	hM4Di	F	-4.3	0	23
3	hM4Di	F	-4.2	1	23
3	hM4Di	F	-4.1	0	23
3	hM4Di	F	-4	0	23
3	hM4Di	F	-3.9	0	23
3	hM4Di	F	-3.8	1	23
3	hM4Di	F	-3.7	0	23
3	hM4Di	F	-3.6	0	23
3	hM4Di	F	-3.5	0	23
3	hM4Di	F	-3.4	0	23
3	hM4Di	F	-3.3	0	23
3	hM4Di	F	-3.2	0	23
3	hM4Di	F	-3.1	0	23
3	hM4Di	F	-3	0	23
3	hM4Di	F	-2.9	0	23
3	hM4Di	F	-2.8	0	23
3	hM4Di	F	-2.7	0	23
3	hM4Di	F	-2.6	0	23
3	hM4Di	F	-2.5	0	23
3	hM4Di	F	-2.4	0	23
3	hM4Di	F	-2.3	0	23
3	hM4Di	F	-2.2	1	23
3	hM4Di	F	-2.1	0	23
3	hM4Di	F	-2	0	23
3	hM4Di	F	-1.9	0	23
3	hM4Di	F	-1.8	0	23
3	hM4Di	F	-1.7	0	23
3	hM4Di	F	-1.6	0	23
3	hM4Di	F	-1.5	0	23
3	hM4Di	F	-1.4	0	23
3	hM4Di	F	-1.3	0	23
3	hM4Di	F	-1.2	1	23
3	hM4Di	F	-1.1	1	23
3	hM4Di	F	-1	0	23
3	hM4Di	F	-0.9	1	23
3	hM4Di	F	-0.8	0	23
3	hM4Di	F	-0.7	0	23
3	hM4Di	F	-0.6	0	23
3	hM4Di	F	-0.5	1	23
3	hM4Di	F	-0.4	0	23
3	hM4Di	F	-0.3	0	23
3	hM4Di	F	-0.2	0	23
3	hM4Di	F	-0.1	0	23
3	hM4Di	F	0	0	22
3	hM4Di	F	0.1	0	23
3	hM4Di	F	0.2	0	23
3	hM4Di	F	0.3	1	23
3	hM4Di	F	0.4	0	23
3	hM4Di	F	0.5	0	23
3	hM4Di	F	0.6	0	23
3	hM4Di	F	0.7	0	23
3	hM4Di	F	0.8	0	23
3	hM4Di	F	0.9	0	23
3	hM4Di	F	1	0	23
3	hM4Di	F	1.1	0	23
3	hM4Di	F	1.2	0	23
3	hM4Di	F	1.3	1	23
3	hM4Di	F	1.4	0	23
3	hM4Di	F	1.5	0	23
3	hM4Di	F	1.6	1	23
3	hM4Di	F	1.7	0	23
3	hM4Di	F	1.8	1	23
3	hM4Di	F	1.9	1	23
3	hM4Di	F	2	1	23
3	hM4Di	F	2.1	0	23
3	hM4Di	F	2.2	0	23
3	hM4Di	F	2.3	2	23
3	hM4Di	F	2.4	0	23
3	hM4Di	F	2.5	1	23
3	hM4Di	F	2.6	0	23
3	hM4Di	F	2.7	0	23
3	hM4Di	F	2.8	0	23
3	hM4Di	F	2.9	0	23
3	hM4Di	F	3	0	23
3	hM4Di	F	3.1	0	23
3	hM4Di	F	3.2	1	23
3	hM4Di	F	3.3	0	23
3	hM4Di	F	3.4	1	23
3	hM4Di	F	3.5	0	23
3	hM4Di	F	3.6	0	23
3	hM4Di	F	3.7	0	23
3	hM4Di	F	3.8	1	23
3	hM4Di	F	3.9	0	23
3	hM4Di	F	4	0	23
3	hM4Di	F	4.1	0	23
3	hM4Di	F	4.2	0	23
3	hM4Di	F	4.3	0	23
3	hM4Di	F	4.4	1	23
3	hM4Di	F	4.5	0	23
3	hM4Di	F	4.6	1	23
3	hM4Di	F	4.7	0	23
3	hM4Di	F	4.8	0	23
3	hM4Di	F	4.9	0	23
3	hM4Di	F	5	0	23
3	hM4Di	F	5.1	0	23
3	hM4Di	F	5.2	0	23
3	hM4Di	F	5.3	0	23
3	hM4Di	F	5.4	0	23
3	hM4Di	F	5.5	0	23
3	hM4Di	F	5.6	1	23
3	hM4Di	F	5.7	0	23
3	hM4Di	F	5.8	0	23
3	hM4Di	F	5.9	0	23
3	hM4Di	F	6	0	23
3	hM4Di	F	6.1	0	23
3	hM4Di	F	6.2	0	23
3	hM4Di	F	6.3	1	23
3	hM4Di	F	6.4	0	23
3	hM4Di	F	6.5	0	23
3	hM4Di	F	6.6	0	23
3	hM4Di	F	6.7	0	23
3	hM4Di	F	6.8	0	23
3	hM4Di	F	6.9	0	23
3	hM4Di	F	7	1	23
3	hM4Di	F	7.1	0	23
3	hM4Di	F	7.2	1	23
3	hM4Di	F	7.3	0	23
3	hM4Di	F	7.4	1	23
3	hM4Di	F	7.5	1	23
3	hM4Di	F	7.6	0	23
3	hM4Di	F	7.7	0	23
3	hM4Di	F	7.8	0	23
3	hM4Di	F	7.9	0	23
3	hM4Di	F	8	0	23
3	hM4Di	F	8.1	0	23
3	hM4Di	F	8.2	0	23
3	hM4Di	F	8.3	0	23
3	hM4Di	F	8.4	0	23
3	hM4Di	F	8.5	0	23
3	hM4Di	F	8.6	1	23
3	hM4Di	F	8.7	0	23
3	hM4Di	F	8.8	0	23
3	hM4Di	F	8.9	0	23
3	hM4Di	F	9	0	23
3	hM4Di	F	9.1	0	23
3	hM4Di	F	9.2	1	23
3	hM4Di	F	9.3	1	23
3	hM4Di	F	9.4	0	23
3	hM4Di	F	9.5	1	23
3	hM4Di	F	9.6	0	23
3	hM4Di	F	9.7	0	23
3	hM4Di	F	9.8	0	23
3	hM4Di	F	9.9	0	23
3	hM4Di	F	10	0	23
3	hM4Di	F	10.1	0	23
3	hM4Di	F	10.2	0	23
3	hM4Di	F	10.3	0	23
3	hM4Di	F	10.4	0	23
3	hM4Di	F	10.5	1	23
3	hM4Di	F	10.6	1	23
3	hM4Di	F	10.7	1	23
3	hM4Di	F	10.8	0	23
3	hM4Di	F	10.9	0	23
3	hM4Di	F	11	0	23
3	hM4Di	F	11.1	1	23
3	hM4Di	F	11.2	0	23
3	hM4Di	F	11.3	0	23
3	hM4Di	F	11.4	0	23
3	hM4Di	F	11.5	0	23
3	hM4Di	F	11.6	0	23
3	hM4Di	F	11.7	0	23
3	hM4Di	F	11.8	0	23
3	hM4Di	F	11.9	0	23
3	hM4Di	F	12	0	23
3	hM4Di	F	12.1	0	23
3	hM4Di	F	12.2	1	23
3	hM4Di	F	12.3	1	23
3	hM4Di	F	12.4	0	23
3	hM4Di	F	12.5	0	23
3	hM4Di	F	12.6	0	23
3	hM4Di	F	12.7	1	23
3	hM4Di	F	12.8	0	23
3	hM4Di	F	12.9	0	23
3	hM4Di	F	13	0	23
3	hM4Di	F	13.1	0	23
3	hM4Di	F	13.2	1	23
3	hM4Di	F	13.3	0	23
3	hM4Di	F	13.4	0	22
3	hM4Di	F	13.5	0	22
3	hM4Di	F	13.6	0	22
3	hM4Di	F	13.7	0	22
3	hM4Di	F	13.8	0	22
3	hM4Di	F	13.9	0	22
3	hM4Di	F	14	0	22
3	hM4Di	F	14.1	0	22
3	hM4Di	F	14.2	0	22
3	hM4Di	F	14.3	1	22
3	hM4Di	F	14.4	0	22
3	hM4Di	F	14.5	0	22
3	hM4Di	F	14.6	0	22
3	hM4Di	F	14.7	0	22
3	hM4Di	F	14.8	0	22
3	hM4Di	F	14.9	0	22
3	hM4Di	F	15	0	22
3	hM4Di	F	15.1	0	22
3	hM4Di	F	15.2	0	22
3	hM4Di	F	15.3	1	22
3	hM4Di	F	15.4	1	22
3	hM4Di	F	15.5	1	22
3	hM4Di	F	15.6	1	22
3	hM4Di	F	15.7	0	22
3	hM4Di	F	15.8	0	22
3	hM4Di	F	15.9	0	22
3	hM4Di	F	16	0	22
3	hM4Di	F	16.1	0	22
3	hM4Di	F	16.2	0	22
3	hM4Di	F	16.3	0	22
3	hM4Di	F	16.4	1	22
3	hM4Di	F	16.5	1	22
3	hM4Di	F	16.6	1	22
3	hM4Di	F	16.7	0	22
3	hM4Di	F	16.8	0	22
3	hM4Di	F	16.9	0	22
3	hM4Di	F	17	0	22
3	hM4Di	F	17.1	0	22
3	hM4Di	F	17.2	0	22
3	hM4Di	F	17.3	0	22
3	hM4Di	F	17.4	0	22
3	hM4Di	F	17.5	0	22
3	hM4Di	F	17.6	0	22
3	hM4Di	F	17.7	1	22
3	hM4Di	F	17.8	0	22
3	hM4Di	F	17.9	0	22
3	hM4Di	F	18	0	22
3	hM4Di	F	18.1	0	21
3	hM4Di	F	18.2	0	21
3	hM4Di	F	18.3	0	21
3	hM4Di	F	18.4	0	21
3	hM4Di	F	18.5	0	21
3	hM4Di	F	18.6	0	21
3	hM4Di	F	18.7	0	21
3	hM4Di	F	18.8	0	21
3	hM4Di	F	18.9	0	21
3	hM4Di	F	19	0	21
3	hM4Di	F	19.1	0	21
3	hM4Di	F	19.2	1	21
3	hM4Di	F	19.3	0	21
3	hM4Di	F	19.4	0	21
3	hM4Di	F	19.5	0	21
3	hM4Di	F	19.6	0	21
3	hM4Di	F	19.7	0	21
3	hM4Di	F	19.8	0	21
3	hM4Di	F	19.9	0	21
3	hM4Di	F	20	0	21
3	hM4Di	F	20.1	0	21
3	hM4Di	F	20.2	0	21
3	hM4Di	F	20.3	0	21
3	hM4Di	F	20.4	0	21
3	hM4Di	F	20.5	0	21
3	hM4Di	F	20.6	0	21
3	hM4Di	F	20.7	0	21
3	hM4Di	F	20.8	0	21
3	hM4Di	F	20.9	0	20
3	hM4Di	F	21	0	20
3	hM4Di	F	21.1	0	20
3	hM4Di	F	21.2	1	20
3	hM4Di	F	21.3	1	20
3	hM4Di	F	21.4	0	20
3	hM4Di	F	21.5	1	20
3	hM4Di	F	21.6	1	20
3	hM4Di	F	21.7	0	20
3	hM4Di	F	21.8	0	20
3	hM4Di	F	21.9	0	20
3	hM4Di	F	22	0	20
3	hM4Di	F	22.1	1	20
3	hM4Di	F	22.2	0	20
3	hM4Di	F	22.3	1	20
3	hM4Di	F	22.4	0	20
3	hM4Di	F	22.5	1	20
3	hM4Di	F	22.6	0	19
3	hM4Di	F	22.7	1	19
3	hM4Di	F	22.8	0	19
3	hM4Di	F	22.9	0	19
3	hM4Di	F	23	0	19
3	hM4Di	F	23.1	0	19
3	hM4Di	F	23.2	0	19
3	hM4Di	F	23.3	0	19
3	hM4Di	F	23.4	0	19
3	hM4Di	F	23.5	0	19
3	hM4Di	F	23.6	0	19
3	hM4Di	F	23.7	0	19
3	hM4Di	F	23.8	0	19
3	hM4Di	F	23.9	0	19
3	hM4Di	F	24	0	19
3	hM4Di	F	24.1	0	19
3	hM4Di	F	24.2	0	19
3	hM4Di	F	24.3	0	19
3	hM4Di	F	24.4	1	19
3	hM4Di	F	24.5	0	19
3	hM4Di	F	24.6	0	19
3	hM4Di	F	24.7	1	19
3	hM4Di	F	24.8	0	19
3	hM4Di	F	24.9	0	19
3	hM4Di	F	25	0	19
3	hM4Di	F	25.1	0	19
3	hM4Di	F	25.2	0	19
3	hM4Di	F	25.3	0	19
3	hM4Di	F	25.4	0	19
3	hM4Di	F	25.5	0	19
3	hM4Di	F	25.6	0	19
3	hM4Di	F	25.7	1	19
3	hM4Di	F	25.8	0	19
3	hM4Di	F	25.9	0	19
3	hM4Di	F	26	0	19
3	hM4Di	F	26.1	0	19
3	hM4Di	F	26.2	0	19
3	hM4Di	F	26.3	0	19
3	hM4Di	F	26.4	0	19
3	hM4Di	F	26.5	0	19
3	hM4Di	F	26.6	0	19
3	hM4Di	F	26.7	0	19
3	hM4Di	F	26.8	0	19
3	hM4Di	F	26.9	0	19
3	hM4Di	F	27	0	19
3	hM4Di	F	27.1	0	19
3	hM4Di	F	27.2	0	19
3	hM4Di	F	27.3	0	19
3	hM4Di	F	27.4	0	19
3	hM4Di	F	27.5	0	19
3	hM4Di	F	27.6	1	19
3	hM4Di	F	27.7	0	19
3	hM4Di	F	27.8	0	19
3	hM4Di	F	27.9	0	18
3	hM4Di	F	28	0	18
3	hM4Di	F	28.1	1	18
3	hM4Di	F	28.2	0	18
3	hM4Di	F	28.3	0	18
3	hM4Di	F	28.4	0	18
3	hM4Di	F	28.5	0	18
3	hM4Di	F	28.6	0	18
3	hM4Di	F	28.7	0	18
3	hM4Di	F	28.8	0	18
3	hM4Di	F	28.9	0	18
3	hM4Di	F	29	1	18
3	hM4Di	F	29.1	0	18
3	hM4Di	F	29.2	0	18
3	hM4Di	F	29.3	0	18
3	hM4Di	F	29.4	0	18
3	hM4Di	F	29.5	0	18
3	hM4Di	F	29.6	0	18
3	hM4Di	F	29.7	0	18
3	hM4Di	F	29.8	0	18
3	hM4Di	F	29.9	0	18
3	hM4Di	F	30	0	15
4	hM4Di	F	-30	0	6
4	hM4Di	F	-29.9	0	6
4	hM4Di	F	-29.8	0	6
4	hM4Di	F	-29.7	0	6
4	hM4Di	F	-29.6	0	6
4	hM4Di	F	-29.5	1	6
4	hM4Di	F	-29.4	1	6
4	hM4Di	F	-29.3	0	6
4	hM4Di	F	-29.2	0	6
4	hM4Di	F	-29.1	0	6
4	hM4Di	F	-29	0	6
4	hM4Di	F	-28.9	0	6
4	hM4Di	F	-28.8	0	6
4	hM4Di	F	-28.7	0	6
4	hM4Di	F	-28.6	0	6
4	hM4Di	F	-28.5	0	6
4	hM4Di	F	-28.4	0	6
4	hM4Di	F	-28.3	0	6
4	hM4Di	F	-28.2	1	6
4	hM4Di	F	-28.1	0	6
4	hM4Di	F	-28	0	6
4	hM4Di	F	-27.9	0	6
4	hM4Di	F	-27.8	1	6
4	hM4Di	F	-27.7	0	6
4	hM4Di	F	-27.6	0	6
4	hM4Di	F	-27.5	1	6
4	hM4Di	F	-27.4	0	6
4	hM4Di	F	-27.3	0	6
4	hM4Di	F	-27.2	0	6
4	hM4Di	F	-27.1	0	6
4	hM4Di	F	-27	0	6
4	hM4Di	F	-26.9	0	6
4	hM4Di	F	-26.8	0	6
4	hM4Di	F	-26.7	1	6
4	hM4Di	F	-26.6	0	6
4	hM4Di	F	-26.5	0	6
4	hM4Di	F	-26.4	0	6
4	hM4Di	F	-26.3	0	6
4	hM4Di	F	-26.2	0	6
4	hM4Di	F	-26.1	0	6
4	hM4Di	F	-26	0	6
4	hM4Di	F	-25.9	0	6
4	hM4Di	F	-25.8	0	7
4	hM4Di	F	-25.7	0	7
4	hM4Di	F	-25.6	0	7
4	hM4Di	F	-25.5	0	7
4	hM4Di	F	-25.4	0	7
4	hM4Di	F	-25.3	0	7
4	hM4Di	F	-25.2	0	7
4	hM4Di	F	-25.1	0	7
4	hM4Di	F	-25	0	7
4	hM4Di	F	-24.9	0	7
4	hM4Di	F	-24.8	0	7
4	hM4Di	F	-24.7	0	7
4	hM4Di	F	-24.6	0	7
4	hM4Di	F	-24.5	0	7
4	hM4Di	F	-24.4	0	7
4	hM4Di	F	-24.3	0	7
4	hM4Di	F	-24.2	0	7
4	hM4Di	F	-24.1	0	7
4	hM4Di	F	-24	0	7
4	hM4Di	F	-23.9	0	7
4	hM4Di	F	-23.8	0	7
4	hM4Di	F	-23.7	0	7
4	hM4Di	F	-23.6	0	7
4	hM4Di	F	-23.5	0	7
4	hM4Di	F	-23.4	0	7
4	hM4Di	F	-23.3	0	7
4	hM4Di	F	-23.2	0	7
4	hM4Di	F	-23.1	0	7
4	hM4Di	F	-23	0	7
4	hM4Di	F	-22.9	0	8
4	hM4Di	F	-22.8	0	8
4	hM4Di	F	-22.7	0	8
4	hM4Di	F	-22.6	0	8
4	hM4Di	F	-22.5	0	8
4	hM4Di	F	-22.4	0	8
4	hM4Di	F	-22.3	0	8
4	hM4Di	F	-22.2	0	8
4	hM4Di	F	-22.1	0	8
4	hM4Di	F	-22	0	8
4	hM4Di	F	-21.9	0	8
4	hM4Di	F	-21.8	0	8
4	hM4Di	F	-21.7	0	8
4	hM4Di	F	-21.6	0	8
4	hM4Di	F	-21.5	0	8
4	hM4Di	F	-21.4	0	8
4	hM4Di	F	-21.3	1	8
4	hM4Di	F	-21.2	0	8
4	hM4Di	F	-21.1	1	8
4	hM4Di	F	-21	0	8
4	hM4Di	F	-20.9	0	8
4	hM4Di	F	-20.8	0	8
4	hM4Di	F	-20.7	0	8
4	hM4Di	F	-20.6	1	8
4	hM4Di	F	-20.5	0	8
4	hM4Di	F	-20.4	0	8
4	hM4Di	F	-20.3	0	8
4	hM4Di	F	-20.2	0	8
4	hM4Di	F	-20.1	0	8
4	hM4Di	F	-20	0	8
4	hM4Di	F	-19.9	0	8
4	hM4Di	F	-19.8	0	8
4	hM4Di	F	-19.7	0	8
4	hM4Di	F	-19.6	0	8
4	hM4Di	F	-19.5	0	8
4	hM4Di	F	-19.4	0	8
4	hM4Di	F	-19.3	0	8
4	hM4Di	F	-19.2	0	8
4	hM4Di	F	-19.1	0	8
4	hM4Di	F	-19	0	8
4	hM4Di	F	-18.9	0	8
4	hM4Di	F	-18.8	0	8
4	hM4Di	F	-18.7	0	8
4	hM4Di	F	-18.6	0	8
4	hM4Di	F	-18.5	0	8
4	hM4Di	F	-18.4	0	8
4	hM4Di	F	-18.3	0	8
4	hM4Di	F	-18.2	0	8
4	hM4Di	F	-18.1	0	8
4	hM4Di	F	-18	0	8
4	hM4Di	F	-17.9	0	8
4	hM4Di	F	-17.8	0	8
4	hM4Di	F	-17.7	0	8
4	hM4Di	F	-17.6	0	8
4	hM4Di	F	-17.5	0	8
4	hM4Di	F	-17.4	1	8
4	hM4Di	F	-17.3	0	8
4	hM4Di	F	-17.2	0	8
4	hM4Di	F	-17.1	0	8
4	hM4Di	F	-17	0	8
4	hM4Di	F	-16.9	0	8
4	hM4Di	F	-16.8	0	8
4	hM4Di	F	-16.7	1	8
4	hM4Di	F	-16.6	0	8
4	hM4Di	F	-16.5	0	8
4	hM4Di	F	-16.4	0	8
4	hM4Di	F	-16.3	0	8
4	hM4Di	F	-16.2	0	8
4	hM4Di	F	-16.1	0	8
4	hM4Di	F	-16	0	8
4	hM4Di	F	-15.9	0	8
4	hM4Di	F	-15.8	0	8
4	hM4Di	F	-15.7	0	8
4	hM4Di	F	-15.6	0	8
4	hM4Di	F	-15.5	0	8
4	hM4Di	F	-15.4	0	8
4	hM4Di	F	-15.3	2	8
4	hM4Di	F	-15.2	0	8
4	hM4Di	F	-15.1	0	8
4	hM4Di	F	-15	0	8
4	hM4Di	F	-14.9	1	8
4	hM4Di	F	-14.8	0	8
4	hM4Di	F	-14.7	1	8
4	hM4Di	F	-14.6	0	8
4	hM4Di	F	-14.5	0	8
4	hM4Di	F	-14.4	0	8
4	hM4Di	F	-14.3	0	8
4	hM4Di	F	-14.2	0	8
4	hM4Di	F	-14.1	0	8
4	hM4Di	F	-14	0	8
4	hM4Di	F	-13.9	0	8
4	hM4Di	F	-13.8	0	8
4	hM4Di	F	-13.7	0	8
4	hM4Di	F	-13.6	1	8
4	hM4Di	F	-13.5	0	8
4	hM4Di	F	-13.4	1	8
4	hM4Di	F	-13.3	0	8
4	hM4Di	F	-13.2	0	8
4	hM4Di	F	-13.1	0	8
4	hM4Di	F	-13	0	8
4	hM4Di	F	-12.9	0	8
4	hM4Di	F	-12.8	0	8
4	hM4Di	F	-12.7	0	8
4	hM4Di	F	-12.6	0	8
4	hM4Di	F	-12.5	0	8
4	hM4Di	F	-12.4	0	8
4	hM4Di	F	-12.3	0	8
4	hM4Di	F	-12.2	1	8
4	hM4Di	F	-12.1	0	8
4	hM4Di	F	-12	1	8
4	hM4Di	F	-11.9	0	8
4	hM4Di	F	-11.8	0	8
4	hM4Di	F	-11.7	0	8
4	hM4Di	F	-11.6	0	8
4	hM4Di	F	-11.5	0	8
4	hM4Di	F	-11.4	0	8
4	hM4Di	F	-11.3	0	8
4	hM4Di	F	-11.2	0	8
4	hM4Di	F	-11.1	0	8
4	hM4Di	F	-11	0	8
4	hM4Di	F	-10.9	0	8
4	hM4Di	F	-10.8	0	8
4	hM4Di	F	-10.7	0	8
4	hM4Di	F	-10.6	0	8
4	hM4Di	F	-10.5	0	8
4	hM4Di	F	-10.4	0	8
4	hM4Di	F	-10.3	1	8
4	hM4Di	F	-10.2	0	8
4	hM4Di	F	-10.1	0	8
4	hM4Di	F	-10	0	8
4	hM4Di	F	-9.9	0	8
4	hM4Di	F	-9.8	0	8
4	hM4Di	F	-9.7	0	8
4	hM4Di	F	-9.6	2	8
4	hM4Di	F	-9.5	0	8
4	hM4Di	F	-9.4	0	8
4	hM4Di	F	-9.3	0	8
4	hM4Di	F	-9.2	0	8
4	hM4Di	F	-9.1	0	8
4	hM4Di	F	-9	0	8
4	hM4Di	F	-8.9	0	8
4	hM4Di	F	-8.8	0	8
4	hM4Di	F	-8.7	0	8
4	hM4Di	F	-8.6	0	8
4	hM4Di	F	-8.5	0	8
4	hM4Di	F	-8.4	0	8
4	hM4Di	F	-8.3	0	8
4	hM4Di	F	-8.2	0	8
4	hM4Di	F	-8.1	0	8
4	hM4Di	F	-8	0	8
4	hM4Di	F	-7.9	0	8
4	hM4Di	F	-7.8	0	8
4	hM4Di	F	-7.7	0	8
4	hM4Di	F	-7.6	0	8
4	hM4Di	F	-7.5	0	8
4	hM4Di	F	-7.4	0	8
4	hM4Di	F	-7.3	0	8
4	hM4Di	F	-7.2	0	8
4	hM4Di	F	-7.1	0	8
4	hM4Di	F	-7	0	8
4	hM4Di	F	-6.9	0	8
4	hM4Di	F	-6.8	0	8
4	hM4Di	F	-6.7	0	8
4	hM4Di	F	-6.6	0	8
4	hM4Di	F	-6.5	0	8
4	hM4Di	F	-6.4	0	8
4	hM4Di	F	-6.3	0	8
4	hM4Di	F	-6.2	0	8
4	hM4Di	F	-6.1	0	8
4	hM4Di	F	-6	1	8
4	hM4Di	F	-5.9	0	8
4	hM4Di	F	-5.8	1	8
4	hM4Di	F	-5.7	0	8
4	hM4Di	F	-5.6	0	8
4	hM4Di	F	-5.5	0	8
4	hM4Di	F	-5.4	0	8
4	hM4Di	F	-5.3	0	8
4	hM4Di	F	-5.2	0	8
4	hM4Di	F	-5.1	0	8
4	hM4Di	F	-5	0	8
4	hM4Di	F	-4.9	0	8
4	hM4Di	F	-4.8	0	8
4	hM4Di	F	-4.7	0	8
4	hM4Di	F	-4.6	0	8
4	hM4Di	F	-4.5	0	8
4	hM4Di	F	-4.4	0	8
4	hM4Di	F	-4.3	0	8
4	hM4Di	F	-4.2	0	8
4	hM4Di	F	-4.1	0	8
4	hM4Di	F	-4	0	8
4	hM4Di	F	-3.9	0	8
4	hM4Di	F	-3.8	0	8
4	hM4Di	F	-3.7	0	8
4	hM4Di	F	-3.6	0	8
4	hM4Di	F	-3.5	0	8
4	hM4Di	F	-3.4	1	8
4	hM4Di	F	-3.3	0	8
4	hM4Di	F	-3.2	0	8
4	hM4Di	F	-3.1	0	8
4	hM4Di	F	-3	0	8
4	hM4Di	F	-2.9	0	8
4	hM4Di	F	-2.8	0	8
4	hM4Di	F	-2.7	0	8
4	hM4Di	F	-2.6	0	8
4	hM4Di	F	-2.5	0	8
4	hM4Di	F	-2.4	0	8
4	hM4Di	F	-2.3	0	8
4	hM4Di	F	-2.2	0	8
4	hM4Di	F	-2.1	0	8
4	hM4Di	F	-2	0	8
4	hM4Di	F	-1.9	1	8
4	hM4Di	F	-1.8	1	8
4	hM4Di	F	-1.7	0	8
4	hM4Di	F	-1.6	0	8
4	hM4Di	F	-1.5	0	8
4	hM4Di	F	-1.4	1	8
4	hM4Di	F	-1.3	0	8
4	hM4Di	F	-1.2	0	8
4	hM4Di	F	-1.1	0	8
4	hM4Di	F	-1	0	8
4	hM4Di	F	-0.9	0	8
4	hM4Di	F	-0.8	0	8
4	hM4Di	F	-0.7	0	8
4	hM4Di	F	-0.6	0	8
4	hM4Di	F	-0.5	0	8
4	hM4Di	F	-0.4	0	8
4	hM4Di	F	-0.3	0	8
4	hM4Di	F	-0.2	0	8
4	hM4Di	F	-0.1	0	8
4	hM4Di	F	0	0	8
4	hM4Di	F	0.1	0	8
4	hM4Di	F	0.2	0	8
4	hM4Di	F	0.3	0	8
4	hM4Di	F	0.4	0	8
4	hM4Di	F	0.5	0	8
4	hM4Di	F	0.6	0	8
4	hM4Di	F	0.7	0	8
4	hM4Di	F	0.8	1	8
4	hM4Di	F	0.9	0	8
4	hM4Di	F	1	0	8
4	hM4Di	F	1.1	0	8
4	hM4Di	F	1.2	0	8
4	hM4Di	F	1.3	0	8
4	hM4Di	F	1.4	1	8
4	hM4Di	F	1.5	0	8
4	hM4Di	F	1.6	0	8
4	hM4Di	F	1.7	0	8
4	hM4Di	F	1.8	0	8
4	hM4Di	F	1.9	0	8
4	hM4Di	F	2	0	8
4	hM4Di	F	2.1	0	8
4	hM4Di	F	2.2	0	8
4	hM4Di	F	2.3	2	8
4	hM4Di	F	2.4	0	8
4	hM4Di	F	2.5	0	8
4	hM4Di	F	2.6	0	8
4	hM4Di	F	2.7	0	8
4	hM4Di	F	2.8	0	8
4	hM4Di	F	2.9	1	8
4	hM4Di	F	3	0	8
4	hM4Di	F	3.1	0	8
4	hM4Di	F	3.2	0	8
4	hM4Di	F	3.3	0	8
4	hM4Di	F	3.4	1	8
4	hM4Di	F	3.5	0	8
4	hM4Di	F	3.6	0	8
4	hM4Di	F	3.7	0	8
4	hM4Di	F	3.8	0	8
4	hM4Di	F	3.9	0	8
4	hM4Di	F	4	0	8
4	hM4Di	F	4.1	0	8
4	hM4Di	F	4.2	0	8
4	hM4Di	F	4.3	0	8
4	hM4Di	F	4.4	2	8
4	hM4Di	F	4.5	1	8
4	hM4Di	F	4.6	1	8
4	hM4Di	F	4.7	0	8
4	hM4Di	F	4.8	0	8
4	hM4Di	F	4.9	0	8
4	hM4Di	F	5	3	8
4	hM4Di	F	5.1	0	8
4	hM4Di	F	5.2	0	8
4	hM4Di	F	5.3	1	8
4	hM4Di	F	5.4	0	8
4	hM4Di	F	5.5	0	8
4	hM4Di	F	5.6	0	8
4	hM4Di	F	5.7	0	8
4	hM4Di	F	5.8	0	8
4	hM4Di	F	5.9	0	8
4	hM4Di	F	6	0	8
4	hM4Di	F	6.1	1	8
4	hM4Di	F	6.2	0	8
4	hM4Di	F	6.3	1	8
4	hM4Di	F	6.4	1	8
4	hM4Di	F	6.5	0	8
4	hM4Di	F	6.6	0	8
4	hM4Di	F	6.7	0	8
4	hM4Di	F	6.8	0	8
4	hM4Di	F	6.9	0	8
4	hM4Di	F	7	0	8
4	hM4Di	F	7.1	0	8
4	hM4Di	F	7.2	0	8
4	hM4Di	F	7.3	0	8
4	hM4Di	F	7.4	0	8
4	hM4Di	F	7.5	0	8
4	hM4Di	F	7.6	0	8
4	hM4Di	F	7.7	0	8
4	hM4Di	F	7.8	0	8
4	hM4Di	F	7.9	0	8
4	hM4Di	F	8	0	8
4	hM4Di	F	8.1	0	8
4	hM4Di	F	8.2	0	8
4	hM4Di	F	8.3	0	8
4	hM4Di	F	8.4	1	8
4	hM4Di	F	8.5	0	8
4	hM4Di	F	8.6	0	8
4	hM4Di	F	8.7	0	8
4	hM4Di	F	8.8	0	8
4	hM4Di	F	8.9	0	8
4	hM4Di	F	9	0	8
4	hM4Di	F	9.1	1	8
4	hM4Di	F	9.2	0	8
4	hM4Di	F	9.3	1	8
4	hM4Di	F	9.4	0	8
4	hM4Di	F	9.5	0	8
4	hM4Di	F	9.6	0	8
4	hM4Di	F	9.7	0	8
4	hM4Di	F	9.8	0	8
4	hM4Di	F	9.9	0	8
4	hM4Di	F	10	0	8
4	hM4Di	F	10.1	0	8
4	hM4Di	F	10.2	0	7
4	hM4Di	F	10.3	0	7
4	hM4Di	F	10.4	0	7
4	hM4Di	F	10.5	0	7
4	hM4Di	F	10.6	0	7
4	hM4Di	F	10.7	0	7
4	hM4Di	F	10.8	0	7
4	hM4Di	F	10.9	0	7
4	hM4Di	F	11	0	7
4	hM4Di	F	11.1	0	7
4	hM4Di	F	11.2	1	7
4	hM4Di	F	11.3	0	7
4	hM4Di	F	11.4	0	7
4	hM4Di	F	11.5	0	7
4	hM4Di	F	11.6	0	7
4	hM4Di	F	11.7	0	7
4	hM4Di	F	11.8	0	7
4	hM4Di	F	11.9	0	7
4	hM4Di	F	12	0	7
4	hM4Di	F	12.1	0	7
4	hM4Di	F	12.2	2	7
4	hM4Di	F	12.3	0	7
4	hM4Di	F	12.4	0	7
4	hM4Di	F	12.5	0	7
4	hM4Di	F	12.6	0	7
4	hM4Di	F	12.7	0	7
4	hM4Di	F	12.8	0	7
4	hM4Di	F	12.9	0	7
4	hM4Di	F	13	0	7
4	hM4Di	F	13.1	0	7
4	hM4Di	F	13.2	0	7
4	hM4Di	F	13.3	1	7
4	hM4Di	F	13.4	0	7
4	hM4Di	F	13.5	0	7
4	hM4Di	F	13.6	0	7
4	hM4Di	F	13.7	0	7
4	hM4Di	F	13.8	0	7
4	hM4Di	F	13.9	0	7
4	hM4Di	F	14	0	7
4	hM4Di	F	14.1	0	7
4	hM4Di	F	14.2	1	7
4	hM4Di	F	14.3	1	7
4	hM4Di	F	14.4	2	7
4	hM4Di	F	14.5	0	7
4	hM4Di	F	14.6	0	7
4	hM4Di	F	14.7	0	7
4	hM4Di	F	14.8	0	7
4	hM4Di	F	14.9	0	7
4	hM4Di	F	15	0	7
4	hM4Di	F	15.1	0	7
4	hM4Di	F	15.2	0	7
4	hM4Di	F	15.3	0	7
4	hM4Di	F	15.4	0	7
4	hM4Di	F	15.5	0	7
4	hM4Di	F	15.6	0	7
4	hM4Di	F	15.7	0	7
4	hM4Di	F	15.8	0	7
4	hM4Di	F	15.9	0	7
4	hM4Di	F	16	0	7
4	hM4Di	F	16.1	0	7
4	hM4Di	F	16.2	0	7
4	hM4Di	F	16.3	0	7
4	hM4Di	F	16.4	0	7
4	hM4Di	F	16.5	0	7
4	hM4Di	F	16.6	0	7
4	hM4Di	F	16.7	0	7
4	hM4Di	F	16.8	0	7
4	hM4Di	F	16.9	0	7
4	hM4Di	F	17	0	7
4	hM4Di	F	17.1	0	7
4	hM4Di	F	17.2	0	7
4	hM4Di	F	17.3	0	7
4	hM4Di	F	17.4	0	7
4	hM4Di	F	17.5	0	7
4	hM4Di	F	17.6	0	7
4	hM4Di	F	17.7	0	7
4	hM4Di	F	17.8	1	7
4	hM4Di	F	17.9	0	7
4	hM4Di	F	18	0	7
4	hM4Di	F	18.1	0	7
4	hM4Di	F	18.2	0	7
4	hM4Di	F	18.3	0	7
4	hM4Di	F	18.4	0	7
4	hM4Di	F	18.5	0	7
4	hM4Di	F	18.6	0	7
4	hM4Di	F	18.7	0	7
4	hM4Di	F	18.8	0	7
4	hM4Di	F	18.9	0	7
4	hM4Di	F	19	0	7
4	hM4Di	F	19.1	1	7
4	hM4Di	F	19.2	0	7
4	hM4Di	F	19.3	0	7
4	hM4Di	F	19.4	0	7
4	hM4Di	F	19.5	0	7
4	hM4Di	F	19.6	0	7
4	hM4Di	F	19.7	0	7
4	hM4Di	F	19.8	0	7
4	hM4Di	F	19.9	0	7
4	hM4Di	F	20	0	7
4	hM4Di	F	20.1	0	7
4	hM4Di	F	20.2	0	7
4	hM4Di	F	20.3	0	7
4	hM4Di	F	20.4	0	7
4	hM4Di	F	20.5	0	7
4	hM4Di	F	20.6	0	7
4	hM4Di	F	20.7	0	7
4	hM4Di	F	20.8	0	7
4	hM4Di	F	20.9	0	7
4	hM4Di	F	21	0	7
4	hM4Di	F	21.1	0	7
4	hM4Di	F	21.2	0	7
4	hM4Di	F	21.3	0	7
4	hM4Di	F	21.4	0	7
4	hM4Di	F	21.5	0	7
4	hM4Di	F	21.6	0	7
4	hM4Di	F	21.7	0	7
4	hM4Di	F	21.8	0	7
4	hM4Di	F	21.9	0	7
4	hM4Di	F	22	0	7
4	hM4Di	F	22.1	0	7
4	hM4Di	F	22.2	0	7
4	hM4Di	F	22.3	0	7
4	hM4Di	F	22.4	0	7
4	hM4Di	F	22.5	0	7
4	hM4Di	F	22.6	0	7
4	hM4Di	F	22.7	0	7
4	hM4Di	F	22.8	0	7
4	hM4Di	F	22.9	0	7
4	hM4Di	F	23	0	7
4	hM4Di	F	23.1	0	7
4	hM4Di	F	23.2	0	7
4	hM4Di	F	23.3	0	7
4	hM4Di	F	23.4	0	7
4	hM4Di	F	23.5	0	7
4	hM4Di	F	23.6	0	7
4	hM4Di	F	23.7	0	7
4	hM4Di	F	23.8	0	7
4	hM4Di	F	23.9	0	7
4	hM4Di	F	24	0	7
4	hM4Di	F	24.1	0	7
4	hM4Di	F	24.2	0	7
4	hM4Di	F	24.3	0	7
4	hM4Di	F	24.4	0	7
4	hM4Di	F	24.5	0	7
4	hM4Di	F	24.6	0	7
4	hM4Di	F	24.7	0	7
4	hM4Di	F	24.8	0	7
4	hM4Di	F	24.9	0	7
4	hM4Di	F	25	0	7
4	hM4Di	F	25.1	0	7
4	hM4Di	F	25.2	0	7
4	hM4Di	F	25.3	0	7
4	hM4Di	F	25.4	0	7
4	hM4Di	F	25.5	0	7
4	hM4Di	F	25.6	0	7
4	hM4Di	F	25.7	0	7
4	hM4Di	F	25.8	1	7
4	hM4Di	F	25.9	0	7
4	hM4Di	F	26	0	7
4	hM4Di	F	26.1	0	7
4	hM4Di	F	26.2	0	7
4	hM4Di	F	26.3	0	7
4	hM4Di	F	26.4	0	7
4	hM4Di	F	26.5	0	7
4	hM4Di	F	26.6	0	7
4	hM4Di	F	26.7	0	7
4	hM4Di	F	26.8	0	7
4	hM4Di	F	26.9	0	7
4	hM4Di	F	27	0	7
4	hM4Di	F	27.1	1	7
4	hM4Di	F	27.2	0	7
4	hM4Di	F	27.3	0	7
4	hM4Di	F	27.4	0	7
4	hM4Di	F	27.5	0	7
4	hM4Di	F	27.6	0	7
4	hM4Di	F	27.7	0	7
4	hM4Di	F	27.8	0	7
4	hM4Di	F	27.9	0	7
4	hM4Di	F	28	0	7
4	hM4Di	F	28.1	0	7
4	hM4Di	F	28.2	0	7
4	hM4Di	F	28.3	0	7
4	hM4Di	F	28.4	0	7
4	hM4Di	F	28.5	0	7
4	hM4Di	F	28.6	0	7
4	hM4Di	F	28.7	0	7
4	hM4Di	F	28.8	0	7
4	hM4Di	F	28.9	0	7
4	hM4Di	F	29	0	7
4	hM4Di	F	29.1	0	7
4	hM4Di	F	29.2	0	7
4	hM4Di	F	29.3	0	7
4	hM4Di	F	29.4	0	7
4	hM4Di	F	29.5	0	7
4	hM4Di	F	29.6	0	7
4	hM4Di	F	29.7	0	7
4	hM4Di	F	29.8	0	7
4	hM4Di	F	29.9	0	7
4	hM4Di	F	30	0	6
5	mCherry	F	-30	0	13
5	mCherry	F	-29.9	0	13
5	mCherry	F	-29.8	0	13
5	mCherry	F	-29.7	0	13
5	mCherry	F	-29.6	0	13
5	mCherry	F	-29.5	0	13
5	mCherry	F	-29.4	0	13
5	mCherry	F	-29.3	0	13
5	mCherry	F	-29.2	0	13
5	mCherry	F	-29.1	0	13
5	mCherry	F	-29	0	13
5	mCherry	F	-28.9	0	13
5	mCherry	F	-28.8	0	13
5	mCherry	F	-28.7	0	13
5	mCherry	F	-28.6	0	13
5	mCherry	F	-28.5	0	13
5	mCherry	F	-28.4	0	13
5	mCherry	F	-28.3	0	13
5	mCherry	F	-28.2	0	14
5	mCherry	F	-28.1	0	14
5	mCherry	F	-28	0	14
5	mCherry	F	-27.9	0	14
5	mCherry	F	-27.8	0	14
5	mCherry	F	-27.7	0	14
5	mCherry	F	-27.6	1	14
5	mCherry	F	-27.5	0	14
5	mCherry	F	-27.4	0	14
5	mCherry	F	-27.3	0	14
5	mCherry	F	-27.2	0	14
5	mCherry	F	-27.1	0	14
5	mCherry	F	-27	0	14
5	mCherry	F	-26.9	0	14
5	mCherry	F	-26.8	1	14
5	mCherry	F	-26.7	0	14
5	mCherry	F	-26.6	0	14
5	mCherry	F	-26.5	0	14
5	mCherry	F	-26.4	0	14
5	mCherry	F	-26.3	0	14
5	mCherry	F	-26.2	0	14
5	mCherry	F	-26.1	0	14
5	mCherry	F	-26	0	14
5	mCherry	F	-25.9	0	14
5	mCherry	F	-25.8	0	14
5	mCherry	F	-25.7	0	14
5	mCherry	F	-25.6	0	14
5	mCherry	F	-25.5	0	14
5	mCherry	F	-25.4	0	14
5	mCherry	F	-25.3	0	14
5	mCherry	F	-25.2	0	14
5	mCherry	F	-25.1	0	14
5	mCherry	F	-25	0	14
5	mCherry	F	-24.9	0	14
5	mCherry	F	-24.8	0	14
5	mCherry	F	-24.7	0	14
5	mCherry	F	-24.6	0	14
5	mCherry	F	-24.5	0	14
5	mCherry	F	-24.4	0	14
5	mCherry	F	-24.3	0	14
5	mCherry	F	-24.2	0	14
5	mCherry	F	-24.1	0	14
5	mCherry	F	-24	0	14
5	mCherry	F	-23.9	0	14
5	mCherry	F	-23.8	0	14
5	mCherry	F	-23.7	0	14
5	mCherry	F	-23.6	0	14
5	mCherry	F	-23.5	0	14
5	mCherry	F	-23.4	0	14
5	mCherry	F	-23.3	0	14
5	mCherry	F	-23.2	0	14
5	mCherry	F	-23.1	0	14
5	mCherry	F	-23	0	15
5	mCherry	F	-22.9	0	15
5	mCherry	F	-22.8	0	15
5	mCherry	F	-22.7	0	15
5	mCherry	F	-22.6	0	15
5	mCherry	F	-22.5	0	15
5	mCherry	F	-22.4	0	15
5	mCherry	F	-22.3	0	15
5	mCherry	F	-22.2	0	15
5	mCherry	F	-22.1	0	15
5	mCherry	F	-22	0	15
5	mCherry	F	-21.9	0	15
5	mCherry	F	-21.8	0	15
5	mCherry	F	-21.7	0	15
5	mCherry	F	-21.6	0	15
5	mCherry	F	-21.5	0	15
5	mCherry	F	-21.4	0	15
5	mCherry	F	-21.3	0	15
5	mCherry	F	-21.2	0	15
5	mCherry	F	-21.1	0	15
5	mCherry	F	-21	0	15
5	mCherry	F	-20.9	1	15
5	mCherry	F	-20.8	0	15
5	mCherry	F	-20.7	2	15
5	mCherry	F	-20.6	2	15
5	mCherry	F	-20.5	1	15
5	mCherry	F	-20.4	0	15
5	mCherry	F	-20.3	1	15
5	mCherry	F	-20.2	1	15
5	mCherry	F	-20.1	0	15
5	mCherry	F	-20	0	15
5	mCherry	F	-19.9	0	15
5	mCherry	F	-19.8	1	15
5	mCherry	F	-19.7	0	15
5	mCherry	F	-19.6	0	16
5	mCherry	F	-19.5	0	16
5	mCherry	F	-19.4	0	16
5	mCherry	F	-19.3	0	16
5	mCherry	F	-19.2	0	16
5	mCherry	F	-19.1	1	16
5	mCherry	F	-19	0	16
5	mCherry	F	-18.9	0	16
5	mCherry	F	-18.8	1	16
5	mCherry	F	-18.7	0	16
5	mCherry	F	-18.6	0	16
5	mCherry	F	-18.5	0	16
5	mCherry	F	-18.4	1	16
5	mCherry	F	-18.3	0	16
5	mCherry	F	-18.2	1	16
5	mCherry	F	-18.1	0	16
5	mCherry	F	-18	0	16
5	mCherry	F	-17.9	0	16
5	mCherry	F	-17.8	0	16
5	mCherry	F	-17.7	0	16
5	mCherry	F	-17.6	0	16
5	mCherry	F	-17.5	0	16
5	mCherry	F	-17.4	0	16
5	mCherry	F	-17.3	0	16
5	mCherry	F	-17.2	0	16
5	mCherry	F	-17.1	1	16
5	mCherry	F	-17	0	16
5	mCherry	F	-16.9	1	16
5	mCherry	F	-16.8	1	16
5	mCherry	F	-16.7	0	16
5	mCherry	F	-16.6	0	16
5	mCherry	F	-16.5	0	16
5	mCherry	F	-16.4	1	16
5	mCherry	F	-16.3	0	16
5	mCherry	F	-16.2	1	16
5	mCherry	F	-16.1	1	16
5	mCherry	F	-16	0	16
5	mCherry	F	-15.9	1	16
5	mCherry	F	-15.8	0	16
5	mCherry	F	-15.7	0	16
5	mCherry	F	-15.6	0	16
5	mCherry	F	-15.5	1	16
5	mCherry	F	-15.4	0	16
5	mCherry	F	-15.3	0	16
5	mCherry	F	-15.2	0	16
5	mCherry	F	-15.1	0	16
5	mCherry	F	-15	1	16
5	mCherry	F	-14.9	0	16
5	mCherry	F	-14.8	1	16
5	mCherry	F	-14.7	0	16
5	mCherry	F	-14.6	0	16
5	mCherry	F	-14.5	1	16
5	mCherry	F	-14.4	1	16
5	mCherry	F	-14.3	0	16
5	mCherry	F	-14.2	0	16
5	mCherry	F	-14.1	1	17
5	mCherry	F	-14	1	17
5	mCherry	F	-13.9	0	17
5	mCherry	F	-13.8	0	17
5	mCherry	F	-13.7	0	17
5	mCherry	F	-13.6	1	17
5	mCherry	F	-13.5	0	17
5	mCherry	F	-13.4	0	17
5	mCherry	F	-13.3	0	18
5	mCherry	F	-13.2	1	18
5	mCherry	F	-13.1	1	18
5	mCherry	F	-13	0	18
5	mCherry	F	-12.9	1	18
5	mCherry	F	-12.8	1	18
5	mCherry	F	-12.7	0	18
5	mCherry	F	-12.6	0	18
5	mCherry	F	-12.5	0	18
5	mCherry	F	-12.4	0	18
5	mCherry	F	-12.3	0	18
5	mCherry	F	-12.2	0	18
5	mCherry	F	-12.1	0	18
5	mCherry	F	-12	0	18
5	mCherry	F	-11.9	0	18
5	mCherry	F	-11.8	0	19
5	mCherry	F	-11.7	0	19
5	mCherry	F	-11.6	0	19
5	mCherry	F	-11.5	0	19
5	mCherry	F	-11.4	0	19
5	mCherry	F	-11.3	0	19
5	mCherry	F	-11.2	0	19
5	mCherry	F	-11.1	0	19
5	mCherry	F	-11	1	19
5	mCherry	F	-10.9	1	19
5	mCherry	F	-10.8	0	19
5	mCherry	F	-10.7	1	19
5	mCherry	F	-10.6	0	19
5	mCherry	F	-10.5	0	19
[truncated: 44,879 more rows]

## Sheet: Fig3_S1_CS+
Subject	Group	Sex	Bin	MagTimes	Opportunities
1	mCherry	F	-30	0	17
1	mCherry	F	-29.9	1	17
1	mCherry	F	-29.8	2	17
1	mCherry	F	-29.7	0	17
1	mCherry	F	-29.6	0	17
1	mCherry	F	-29.5	0	17
1	mCherry	F	-29.4	0	17
1	mCherry	F	-29.3	0	17
1	mCherry	F	-29.2	0	17
1	mCherry	F	-29.1	1	17
1	mCherry	F	-29	0	17
1	mCherry	F	-28.9	0	17
1	mCherry	F	-28.8	0	17
1	mCherry	F	-28.7	0	17
1	mCherry	F	-28.6	0	17
1	mCherry	F	-28.5	0	17
1	mCherry	F	-28.4	1	17
1	mCherry	F	-28.3	1	17
1	mCherry	F	-28.2	2	17
1	mCherry	F	-28.1	0	17
1	mCherry	F	-28	1	17
1	mCherry	F	-27.9	0	17
1	mCherry	F	-27.8	0	17
1	mCherry	F	-27.7	0	17
1	mCherry	F	-27.6	1	17
1	mCherry	F	-27.5	1	17
1	mCherry	F	-27.4	0	17
1	mCherry	F	-27.3	0	17
1	mCherry	F	-27.2	2	17
1	mCherry	F	-27.1	1	17
1	mCherry	F	-27	0	17
1	mCherry	F	-26.9	1	17
1	mCherry	F	-26.8	2	17
1	mCherry	F	-26.7	0	17
1	mCherry	F	-26.6	0	17
1	mCherry	F	-26.5	0	17
1	mCherry	F	-26.4	0	17
1	mCherry	F	-26.3	0	17
1	mCherry	F	-26.2	0	17
1	mCherry	F	-26.1	0	17
1	mCherry	F	-26	0	17
1	mCherry	F	-25.9	0	17
1	mCherry	F	-25.8	0	17
1	mCherry	F	-25.7	0	17
1	mCherry	F	-25.6	0	17
1	mCherry	F	-25.5	0	17
1	mCherry	F	-25.4	0	17
1	mCherry	F	-25.3	0	17
1	mCherry	F	-25.2	0	17
1	mCherry	F	-25.1	0	17
1	mCherry	F	-25	1	17
1	mCherry	F	-24.9	0	17
1	mCherry	F	-24.8	0	17
1	mCherry	F	-24.7	0	17
1	mCherry	F	-24.6	0	17
1	mCherry	F	-24.5	0	17
1	mCherry	F	-24.4	0	17
1	mCherry	F	-24.3	0	17
1	mCherry	F	-24.2	0	17
1	mCherry	F	-24.1	1	17
1	mCherry	F	-24	0	17
1	mCherry	F	-23.9	0	17
1	mCherry	F	-23.8	0	17
1	mCherry	F	-23.7	0	17
1	mCherry	F	-23.6	0	17
1	mCherry	F	-23.5	0	17
1	mCherry	F	-23.4	0	17
1	mCherry	F	-23.3	0	17
1	mCherry	F	-23.2	0	17
1	mCherry	F	-23.1	0	17
1	mCherry	F	-23	0	17
1	mCherry	F	-22.9	0	17
1	mCherry	F	-22.8	0	17
1	mCherry	F	-22.7	0	17
1	mCherry	F	-22.6	0	17
1	mCherry	F	-22.5	0	17
1	mCherry	F	-22.4	0	17
1	mCherry	F	-22.3	0	17
1	mCherry	F	-22.2	0	17
1	mCherry	F	-22.1	1	17
1	mCherry	F	-22	0	17
1	mCherry	F	-21.9	0	17
1	mCherry	F	-21.8	0	17
1	mCherry	F	-21.7	0	17
1	mCherry	F	-21.6	0	17
1	mCherry	F	-21.5	2	17
1	mCherry	F	-21.4	1	17
1	mCherry	F	-21.3	1	17
1	mCherry	F	-21.2	0	17
1	mCherry	F	-21.1	0	17
1	mCherry	F	-21	0	17
1	mCherry	F	-20.9	0	17
1	mCherry	F	-20.8	0	17
1	mCherry	F	-20.7	1	17
1	mCherry	F	-20.6	0	17
1	mCherry	F	-20.5	0	17
1	mCherry	F	-20.4	0	17
1	mCherry	F	-20.3	0	17
1	mCherry	F	-20.2	1	18
1	mCherry	F	-20.1	1	18
1	mCherry	F	-20	1	18
1	mCherry	F	-19.9	1	18
1	mCherry	F	-19.8	0	18
1	mCherry	F	-19.7	0	18
1	mCherry	F	-19.6	0	18
1	mCherry	F	-19.5	0	18
1	mCherry	F	-19.4	0	18
1	mCherry	F	-19.3	0	18
1	mCherry	F	-19.2	0	18
1	mCherry	F	-19.1	0	18
1	mCherry	F	-19	0	18
1	mCherry	F	-18.9	0	18
1	mCherry	F	-18.8	0	18
1	mCherry	F	-18.7	0	18
1	mCherry	F	-18.6	0	18
1	mCherry	F	-18.5	0	18
1	mCherry	F	-18.4	0	18
1	mCherry	F	-18.3	0	18
1	mCherry	F	-18.2	0	18
1	mCherry	F	-18.1	0	18
1	mCherry	F	-18	0	18
1	mCherry	F	-17.9	0	18
1	mCherry	F	-17.8	0	18
1	mCherry	F	-17.7	0	18
1	mCherry	F	-17.6	0	18
1	mCherry	F	-17.5	0	18
1	mCherry	F	-17.4	0	18
1	mCherry	F	-17.3	0	18
1	mCherry	F	-17.2	1	18
1	mCherry	F	-17.1	0	18
1	mCherry	F	-17	0	18
1	mCherry	F	-16.9	0	18
1	mCherry	F	-16.8	0	18
1	mCherry	F	-16.7	0	18
1	mCherry	F	-16.6	0	18
1	mCherry	F	-16.5	1	18
1	mCherry	F	-16.4	0	18
1	mCherry	F	-16.3	0	18
1	mCherry	F	-16.2	0	18
1	mCherry	F	-16.1	0	18
1	mCherry	F	-16	0	18
1	mCherry	F	-15.9	0	18
1	mCherry	F	-15.8	0	18
1	mCherry	F	-15.7	0	18
1	mCherry	F	-15.6	1	18
1	mCherry	F	-15.5	0	18
1	mCherry	F	-15.4	0	18
1	mCherry	F	-15.3	0	18
1	mCherry	F	-15.2	0	18
1	mCherry	F	-15.1	1	18
1	mCherry	F	-15	0	18
1	mCherry	F	-14.9	0	18
1	mCherry	F	-14.8	1	18
1	mCherry	F	-14.7	0	18
1	mCherry	F	-14.6	1	18
1	mCherry	F	-14.5	0	18
1	mCherry	F	-14.4	0	18
1	mCherry	F	-14.3	1	18
1	mCherry	F	-14.2	0	18
1	mCherry	F	-14.1	1	18
1	mCherry	F	-14	1	18
1	mCherry	F	-13.9	0	18
1	mCherry	F	-13.8	0	18
1	mCherry	F	-13.7	0	18
1	mCherry	F	-13.6	0	18
1	mCherry	F	-13.5	0	19
1	mCherry	F	-13.4	1	19
1	mCherry	F	-13.3	0	19
1	mCherry	F	-13.2	2	19
1	mCherry	F	-13.1	2	19
1	mCherry	F	-13	0	19
1	mCherry	F	-12.9	1	19
1	mCherry	F	-12.8	0	19
1	mCherry	F	-12.7	2	19
1	mCherry	F	-12.6	1	19
1	mCherry	F	-12.5	0	19
1	mCherry	F	-12.4	0	19
1	mCherry	F	-12.3	2	19
1	mCherry	F	-12.2	0	19
1	mCherry	F	-12.1	0	19
1	mCherry	F	-12	0	19
1	mCherry	F	-11.9	1	19
1	mCherry	F	-11.8	0	19
1	mCherry	F	-11.7	4	19
1	mCherry	F	-11.6	0	19
1	mCherry	F	-11.5	0	19
1	mCherry	F	-11.4	0	19
1	mCherry	F	-11.3	0	19
1	mCherry	F	-11.2	1	19
1	mCherry	F	-11.1	0	19
1	mCherry	F	-11	0	19
1	mCherry	F	-10.9	1	19
1	mCherry	F	-10.8	0	19
1	mCherry	F	-10.7	0	19
1	mCherry	F	-10.6	0	19
1	mCherry	F	-10.5	0	19
1	mCherry	F	-10.4	0	19
1	mCherry	F	-10.3	0	19
1	mCherry	F	-10.2	2	19
1	mCherry	F	-10.1	1	19
1	mCherry	F	-10	1	19
1	mCherry	F	-9.9	0	19
1	mCherry	F	-9.8	0	19
1	mCherry	F	-9.7	1	19
1	mCherry	F	-9.6	0	19
1	mCherry	F	-9.5	2	19
1	mCherry	F	-9.4	0	19
1	mCherry	F	-9.3	1	19
1	mCherry	F	-9.2	0	19
1	mCherry	F	-9.1	0	19
1	mCherry	F	-9	0	19
1	mCherry	F	-8.9	0	19
1	mCherry	F	-8.8	0	19
1	mCherry	F	-8.7	1	19
1	mCherry	F	-8.6	0	19
1	mCherry	F	-8.5	1	19
1	mCherry	F	-8.4	0	19
1	mCherry	F	-8.3	1	19
1	mCherry	F	-8.2	0	19
1	mCherry	F	-8.1	1	19
1	mCherry	F	-8	4	19
1	mCherry	F	-7.9	2	19
1	mCherry	F	-7.8	1	19
1	mCherry	F	-7.7	1	19
1	mCherry	F	-7.6	4	19
1	mCherry	F	-7.5	0	19
1	mCherry	F	-7.4	0	19
1	mCherry	F	-7.3	0	19
1	mCherry	F	-7.2	0	19
1	mCherry	F	-7.1	0	19
1	mCherry	F	-7	1	19
1	mCherry	F	-6.9	0	19
1	mCherry	F	-6.8	1	19
1	mCherry	F	-6.7	0	19
1	mCherry	F	-6.6	0	19
1	mCherry	F	-6.5	0	19
1	mCherry	F	-6.4	0	19
1	mCherry	F	-6.3	0	19
1	mCherry	F	-6.2	3	19
1	mCherry	F	-6.1	0	19
1	mCherry	F	-6	0	19
1	mCherry	F	-5.9	1	19
1	mCherry	F	-5.8	0	19
1	mCherry	F	-5.7	0	19
1	mCherry	F	-5.6	0	20
1	mCherry	F	-5.5	0	20
1	mCherry	F	-5.4	0	20
1	mCherry	F	-5.3	1	20
1	mCherry	F	-5.2	0	20
1	mCherry	F	-5.1	2	20
1	mCherry	F	-5	1	20
1	mCherry	F	-4.9	1	20
1	mCherry	F	-4.8	0	20
1	mCherry	F	-4.7	0	20
1	mCherry	F	-4.6	0	20
1	mCherry	F	-4.5	2	20
1	mCherry	F	-4.4	0	20
1	mCherry	F	-4.3	1	20
1	mCherry	F	-4.2	1	20
1	mCherry	F	-4.1	0	21
1	mCherry	F	-4	0	21
1	mCherry	F	-3.9	0	21
1	mCherry	F	-3.8	0	21
1	mCherry	F	-3.7	0	21
1	mCherry	F	-3.6	0	21
1	mCherry	F	-3.5	1	21
1	mCherry	F	-3.4	3	21
1	mCherry	F	-3.3	1	21
1	mCherry	F	-3.2	1	21
1	mCherry	F	-3.1	0	21
1	mCherry	F	-3	0	21
1	mCherry	F	-2.9	0	21
1	mCherry	F	-2.8	0	21
1	mCherry	F	-2.7	0	21
1	mCherry	F	-2.6	0	21
1	mCherry	F	-2.5	1	21
1	mCherry	F	-2.4	1	21
1	mCherry	F	-2.3	0	21
1	mCherry	F	-2.2	0	21
1	mCherry	F	-2.1	1	21
1	mCherry	F	-2	0	21
1	mCherry	F	-1.9	1	21
1	mCherry	F	-1.8	0	21
1	mCherry	F	-1.7	0	21
1	mCherry	F	-1.6	0	21
1	mCherry	F	-1.5	1	21
1	mCherry	F	-1.4	0	21
1	mCherry	F	-1.3	1	21
1	mCherry	F	-1.2	0	21
1	mCherry	F	-1.1	1	21
1	mCherry	F	-1	0	21
1	mCherry	F	-0.9	0	21
1	mCherry	F	-0.8	0	21
1	mCherry	F	-0.7	0	21
1	mCherry	F	-0.6	0	21
1	mCherry	F	-0.5	2	21
1	mCherry	F	-0.4	0	21
1	mCherry	F	-0.3	0	21
1	mCherry	F	-0.2	0	21
1	mCherry	F	-0.1	0	21
1	mCherry	F	0	0	20
1	mCherry	F	0.1	0	21
1	mCherry	F	0.2	0	21
1	mCherry	F	0.3	0	21
1	mCherry	F	0.4	1	21
1	mCherry	F	0.5	0	21
1	mCherry	F	0.6	0	21
1	mCherry	F	0.7	0	21
1	mCherry	F	0.8	0	21
1	mCherry	F	0.9	3	21
1	mCherry	F	1	0	21
1	mCherry	F	1.1	0	21
1	mCherry	F	1.2	0	20
1	mCherry	F	1.3	0	20
1	mCherry	F	1.4	1	20
1	mCherry	F	1.5	0	20
1	mCherry	F	1.6	1	20
1	mCherry	F	1.7	0	20
1	mCherry	F	1.8	1	20
1	mCherry	F	1.9	1	20
1	mCherry	F	2	0	20
1	mCherry	F	2.1	0	20
1	mCherry	F	2.2	1	20
1	mCherry	F	2.3	1	20
1	mCherry	F	2.4	1	20
1	mCherry	F	2.5	0	20
1	mCherry	F	2.6	0	20
1	mCherry	F	2.7	0	20
1	mCherry	F	2.8	0	20
1	mCherry	F	2.9	0	20
1	mCherry	F	3	1	20
1	mCherry	F	3.1	0	20
1	mCherry	F	3.2	1	20
1	mCherry	F	3.3	1	20
1	mCherry	F	3.4	0	20
1	mCherry	F	3.5	0	20
1	mCherry	F	3.6	0	20
1	mCherry	F	3.7	0	20
1	mCherry	F	3.8	0	20
1	mCherry	F	3.9	0	20
1	mCherry	F	4	1	20
1	mCherry	F	4.1	0	20
1	mCherry	F	4.2	0	20
1	mCherry	F	4.3	1	20
1	mCherry	F	4.4	2	20
1	mCherry	F	4.5	0	20
1	mCherry	F	4.6	0	20
1	mCherry	F	4.7	0	20
1	mCherry	F	4.8	0	20
1	mCherry	F	4.9	1	20
1	mCherry	F	5	1	20
1	mCherry	F	5.1	2	20
1	mCherry	F	5.2	0	20
1	mCherry	F	5.3	1	20
1	mCherry	F	5.4	1	20
1	mCherry	F	5.5	0	20
1	mCherry	F	5.6	1	20
1	mCherry	F	5.7	0	20
1	mCherry	F	5.8	0	20
1	mCherry	F	5.9	1	20
1	mCherry	F	6	1	20
1	mCherry	F	6.1	1	20
1	mCherry	F	6.2	1	20
1	mCherry	F	6.3	1	20
1	mCherry	F	6.4	1	20
1	mCherry	F	6.5	1	20
1	mCherry	F	6.6	0	20
1	mCherry	F	6.7	1	20
1	mCherry	F	6.8	0	20
1	mCherry	F	6.9	0	20
1	mCherry	F	7	3	20
1	mCherry	F	7.1	0	20
1	mCherry	F	7.2	0	20
1	mCherry	F	7.3	0	20
1	mCherry	F	7.4	0	20
1	mCherry	F	7.5	0	20
1	mCherry	F	7.6	0	20
1	mCherry	F	7.7	0	20
1	mCherry	F	7.8	0	20
1	mCherry	F	7.9	0	20
1	mCherry	F	8	0	20
1	mCherry	F	8.1	0	20
1	mCherry	F	8.2	2	20
1	mCherry	F	8.3	0	20
1	mCherry	F	8.4	1	20
1	mCherry	F	8.5	2	20
1	mCherry	F	8.6	0	20
1	mCherry	F	8.7	1	20
1	mCherry	F	8.8	1	20
1	mCherry	F	8.9	1	20
1	mCherry	F	9	0	20
1	mCherry	F	9.1	1	20
1	mCherry	F	9.2	0	20
1	mCherry	F	9.3	0	19
1	mCherry	F	9.4	0	19
1	mCherry	F	9.5	1	19
1	mCherry	F	9.6	0	19
1	mCherry	F	9.7	1	19
1	mCherry	F	9.8	0	19
1	mCherry	F	9.9	0	19
1	mCherry	F	10	0	19
1	mCherry	F	10.1	2	19
1	mCherry	F	10.2	1	19
1	mCherry	F	10.3	1	19
1	mCherry	F	10.4	0	19
1	mCherry	F	10.5	1	19
1	mCherry	F	10.6	0	19
1	mCherry	F	10.7	0	19
1	mCherry	F	10.8	0	19
1	mCherry	F	10.9	1	19
1	mCherry	F	11	0	19
1	mCherry	F	11.1	0	19
1	mCherry	F	11.2	1	19
1	mCherry	F	11.3	1	19
1	mCherry	F	11.4	0	19
1	mCherry	F	11.5	0	19
1	mCherry	F	11.6	0	19
1	mCherry	F	11.7	0	19
1	mCherry	F	11.8	0	19
1	mCherry	F	11.9	1	19
1	mCherry	F	12	0	19
1	mCherry	F	12.1	0	19
1	mCherry	F	12.2	0	19
1	mCherry	F	12.3	0	19
1	mCherry	F	12.4	0	19
1	mCherry	F	12.5	1	19
1	mCherry	F	12.6	1	19
1	mCherry	F	12.7	0	19
1	mCherry	F	12.8	0	19
1	mCherry	F	12.9	1	19
1	mCherry	F	13	0	19
1	mCherry	F	13.1	0	19
1	mCherry	F	13.2	0	19
1	mCherry	F	13.3	1	19
1	mCherry	F	13.4	0	19
1	mCherry	F	13.5	0	19
1	mCherry	F	13.6	4	19
1	mCherry	F	13.7	1	19
1	mCherry	F	13.8	0	19
1	mCherry	F	13.9	1	19
1	mCherry	F	14	0	19
1	mCherry	F	14.1	0	19
1	mCherry	F	14.2	0	19
1	mCherry	F	14.3	0	19
1	mCherry	F	14.4	0	19
1	mCherry	F	14.5	0	19
1	mCherry	F	14.6	1	19
1	mCherry	F	14.7	2	19
1	mCherry	F	14.8	0	19
1	mCherry	F	14.9	0	19
1	mCherry	F	15	0	19
1	mCherry	F	15.1	0	19
1	mCherry	F	15.2	0	19
1	mCherry	F	15.3	0	19
1	mCherry	F	15.4	1	19
1	mCherry	F	15.5	1	19
1	mCherry	F	15.6	2	19
1	mCherry	F	15.7	1	19
1	mCherry	F	15.8	0	19
1	mCherry	F	15.9	1	19
1	mCherry	F	16	1	19
1	mCherry	F	16.1	1	19
1	mCherry	F	16.2	3	19
1	mCherry	F	16.3	1	19
1	mCherry	F	16.4	3	19
1	mCherry	F	16.5	1	19
1	mCherry	F	16.6	0	19
1	mCherry	F	16.7	0	19
1	mCherry	F	16.8	0	19
1	mCherry	F	16.9	0	19
1	mCherry	F	17	2	19
1	mCherry	F	17.1	0	19
1	mCherry	F	17.2	0	19
1	mCherry	F	17.3	0	19
1	mCherry	F	17.4	1	19
1	mCherry	F	17.5	0	19
1	mCherry	F	17.6	2	19
1	mCherry	F	17.7	0	19
1	mCherry	F	17.8	1	19
1	mCherry	F	17.9	1	19
1	mCherry	F	18	1	19
1	mCherry	F	18.1	0	19
1	mCherry	F	18.2	2	19
1	mCherry	F	18.3	1	19
1	mCherry	F	18.4	0	19
1	mCherry	F	18.5	0	19
1	mCherry	F	18.6	0	19
1	mCherry	F	18.7	0	19
1	mCherry	F	18.8	1	19
1	mCherry	F	18.9	0	19
1	mCherry	F	19	0	19
1	mCherry	F	19.1	2	19
1	mCherry	F	19.2	1	19
1	mCherry	F	19.3	1	19
1	mCherry	F	19.4	0	19
1	mCherry	F	19.5	0	19
1	mCherry	F	19.6	0	19
1	mCherry	F	19.7	1	19
1	mCherry	F	19.8	1	19
1	mCherry	F	19.9	1	19
1	mCherry	F	20	0	19
1	mCherry	F	20.1	0	19
1	mCherry	F	20.2	0	18
1	mCherry	F	20.3	1	18
1	mCherry	F	20.4	0	18
1	mCherry	F	20.5	0	18
1	mCherry	F	20.6	1	18
1	mCherry	F	20.7	0	18
1	mCherry	F	20.8	0	18
1	mCherry	F	20.9	0	18
1	mCherry	F	21	0	18
1	mCherry	F	21.1	0	18
1	mCherry	F	21.2	1	18
1	mCherry	F	21.3	0	18
1	mCherry	F	21.4	1	18
1	mCherry	F	21.5	1	18
1	mCherry	F	21.6	0	18
1	mCherry	F	21.7	2	18
1	mCherry	F	21.8	0	18
1	mCherry	F	21.9	0	18
1	mCherry	F	22	0	18
1	mCherry	F	22.1	0	18
1	mCherry	F	22.2	0	18
1	mCherry	F	22.3	0	18
1	mCherry	F	22.4	0	18
1	mCherry	F	22.5	1	18
1	mCherry	F	22.6	0	18
1	mCherry	F	22.7	0	18
1	mCherry	F	22.8	0	18
1	mCherry	F	22.9	1	18
1	mCherry	F	23	0	18
1	mCherry	F	23.1	1	18
1	mCherry	F	23.2	1	18
1	mCherry	F	23.3	0	18
1	mCherry	F	23.4	2	18
1	mCherry	F	23.5	0	18
1	mCherry	F	23.6	1	18
1	mCherry	F	23.7	0	18
1	mCherry	F	23.8	0	18
1	mCherry	F	23.9	0	18
1	mCherry	F	24	0	18
1	mCherry	F	24.1	0	18
1	mCherry	F	24.2	2	18
1	mCherry	F	24.3	0	18
1	mCherry	F	24.4	2	18
1	mCherry	F	24.5	0	18
1	mCherry	F	24.6	2	18
1	mCherry	F	24.7	0	18
1	mCherry	F	24.8	1	18
1	mCherry	F	24.9	0	18
1	mCherry	F	25	1	18
1	mCherry	F	25.1	0	18
1	mCherry	F	25.2	1	18
1	mCherry	F	25.3	0	18
1	mCherry	F	25.4	0	18
1	mCherry	F	25.5	0	18
1	mCherry	F	25.6	0	18
1	mCherry	F	25.7	0	18
1	mCherry	F	25.8	1	18
1	mCherry	F	25.9	0	18
1	mCherry	F	26	0	18
1	mCherry	F	26.1	0	18
1	mCherry	F	26.2	0	18
1	mCherry	F	26.3	1	18
1	mCherry	F	26.4	0	18
1	mCherry	F	26.5	0	18
1	mCherry	F	26.6	0	18
1	mCherry	F	26.7	0	18
1	mCherry	F	26.8	1	18
1	mCherry	F	26.9	0	18
1	mCherry	F	27	0	18
1	mCherry	F	27.1	0	18
1	mCherry	F	27.2	0	18
1	mCherry	F	27.3	0	18
1	mCherry	F	27.4	1	18
1	mCherry	F	27.5	1	18
1	mCherry	F	27.6	1	18
1	mCherry	F	27.7	0	18
1	mCherry	F	27.8	0	18
1	mCherry	F	27.9	0	18
1	mCherry	F	28	0	18
1	mCherry	F	28.1	0	18
1	mCherry	F	28.2	1	18
1	mCherry	F	28.3	1	18
1	mCherry	F	28.4	0	18
1	mCherry	F	28.5	1	18
1	mCherry	F	28.6	1	18
1	mCherry	F	28.7	0	18
1	mCherry	F	28.8	0	18
1	mCherry	F	28.9	0	18
1	mCherry	F	29	0	18
1	mCherry	F	29.1	0	18
1	mCherry	F	29.2	0	18
1	mCherry	F	29.3	0	18
1	mCherry	F	29.4	0	18
1	mCherry	F	29.5	0	18
1	mCherry	F	29.6	1	18
1	mCherry	F	29.7	0	18
1	mCherry	F	29.8	0	18
1	mCherry	F	29.9	0	18
1	mCherry	F	30	1	18
3	hM4Di	F	-30	0	25
3	hM4Di	F	-29.9	0	25
3	hM4Di	F	-29.8	1	25
3	hM4Di	F	-29.7	0	25
3	hM4Di	F	-29.6	0	26
3	hM4Di	F	-29.5	1	26
3	hM4Di	F	-29.4	0	26
3	hM4Di	F	-29.3	3	26
3	hM4Di	F	-29.2	2	26
3	hM4Di	F	-29.1	1	26
3	hM4Di	F	-29	0	26
3	hM4Di	F	-28.9	1	26
3	hM4Di	F	-28.8	0	26
3	hM4Di	F	-28.7	0	26
3	hM4Di	F	-28.6	2	26
3	hM4Di	F	-28.5	1	26
3	hM4Di	F	-28.4	0	26
3	hM4Di	F	-28.3	1	26
3	hM4Di	F	-28.2	0	26
3	hM4Di	F	-28.1	0	26
3	hM4Di	F	-28	1	26
3	hM4Di	F	-27.9	1	26
3	hM4Di	F	-27.8	0	26
3	hM4Di	F	-27.7	2	26
3	hM4Di	F	-27.6	0	26
3	hM4Di	F	-27.5	0	26
3	hM4Di	F	-27.4	0	26
3	hM4Di	F	-27.3	0	26
3	hM4Di	F	-27.2	0	26
3	hM4Di	F	-27.1	1	26
3	hM4Di	F	-27	0	26
3	hM4Di	F	-26.9	2	26
3	hM4Di	F	-26.8	0	26
3	hM4Di	F	-26.7	0	26
3	hM4Di	F	-26.6	0	26
3	hM4Di	F	-26.5	0	26
3	hM4Di	F	-26.4	1	26
3	hM4Di	F	-26.3	0	26
3	hM4Di	F	-26.2	1	26
3	hM4Di	F	-26.1	0	26
3	hM4Di	F	-26	1	26
3	hM4Di	F	-25.9	1	26
3	hM4Di	F	-25.8	1	26
3	hM4Di	F	-25.7	1	26
3	hM4Di	F	-25.6	1	26
3	hM4Di	F	-25.5	0	26
3	hM4Di	F	-25.4	1	26
3	hM4Di	F	-25.3	0	26
3	hM4Di	F	-25.2	0	26
3	hM4Di	F	-25.1	0	26
3	hM4Di	F	-25	0	26
3	hM4Di	F	-24.9	0	26
3	hM4Di	F	-24.8	0	26
3	hM4Di	F	-24.7	0	26
3	hM4Di	F	-24.6	1	26
3	hM4Di	F	-24.5	2	26
3	hM4Di	F	-24.4	0	26
3	hM4Di	F	-24.3	0	26
3	hM4Di	F	-24.2	0	26
3	hM4Di	F	-24.1	0	26
3	hM4Di	F	-24	0	26
3	hM4Di	F	-23.9	0	26
3	hM4Di	F	-23.8	0	26
3	hM4Di	F	-23.7	1	26
3	hM4Di	F	-23.6	1	26
3	hM4Di	F	-23.5	0	26
3	hM4Di	F	-23.4	1	26
3	hM4Di	F	-23.3	0	26
3	hM4Di	F	-23.2	0	26
3	hM4Di	F	-23.1	1	26
3	hM4Di	F	-23	1	26
3	hM4Di	F	-22.9	0	26
3	hM4Di	F	-22.8	0	26
3	hM4Di	F	-22.7	0	26
3	hM4Di	F	-22.6	0	26
3	hM4Di	F	-22.5	0	26
3	hM4Di	F	-22.4	0	26
3	hM4Di	F	-22.3	0	26
3	hM4Di	F	-22.2	0	26
3	hM4Di	F	-22.1	0	26
3	hM4Di	F	-22	0	26
3	hM4Di	F	-21.9	0	26
3	hM4Di	F	-21.8	0	26
3	hM4Di	F	-21.7	0	26
3	hM4Di	F	-21.6	0	26
3	hM4Di	F	-21.5	0	26
3	hM4Di	F	-21.4	0	26
3	hM4Di	F	-21.3	1	26
3	hM4Di	F	-21.2	1	26
3	hM4Di	F	-21.1	0	26
3	hM4Di	F	-21	0	26
3	hM4Di	F	-20.9	0	26
3	hM4Di	F	-20.8	0	26
3	hM4Di	F	-20.7	2	26
3	hM4Di	F	-20.6	2	26
3	hM4Di	F	-20.5	0	26
3	hM4Di	F	-20.4	1	26
3	hM4Di	F	-20.3	0	26
3	hM4Di	F	-20.2	1	26
3	hM4Di	F	-20.1	0	26
3	hM4Di	F	-20	0	26
3	hM4Di	F	-19.9	1	26
3	hM4Di	F	-19.8	0	26
3	hM4Di	F	-19.7	0	26
3	hM4Di	F	-19.6	1	26
3	hM4Di	F	-19.5	0	26
3	hM4Di	F	-19.4	0	26
3	hM4Di	F	-19.3	0	26
3	hM4Di	F	-19.2	0	26
3	hM4Di	F	-19.1	0	26
3	hM4Di	F	-19	2	26
3	hM4Di	F	-18.9	0	26
3	hM4Di	F	-18.8	1	26
3	hM4Di	F	-18.7	2	26
3	hM4Di	F	-18.6	1	26
3	hM4Di	F	-18.5	0	26
3	hM4Di	F	-18.4	0	26
3	hM4Di	F	-18.3	0	26
3	hM4Di	F	-18.2	1	26
3	hM4Di	F	-18.1	0	26
3	hM4Di	F	-18	0	26
3	hM4Di	F	-17.9	1	26
3	hM4Di	F	-17.8	0	26
3	hM4Di	F	-17.7	0	26
3	hM4Di	F	-17.6	0	26
3	hM4Di	F	-17.5	0	26
3	hM4Di	F	-17.4	0	26
3	hM4Di	F	-17.3	0	26
3	hM4Di	F	-17.2	0	26
3	hM4Di	F	-17.1	0	26
3	hM4Di	F	-17	0	26
3	hM4Di	F	-16.9	3	26
3	hM4Di	F	-16.8	0	26
3	hM4Di	F	-16.7	0	26
3	hM4Di	F	-16.6	0	26
3	hM4Di	F	-16.5	2	26
3	hM4Di	F	-16.4	0	26
3	hM4Di	F	-16.3	2	26
3	hM4Di	F	-16.2	0	26
3	hM4Di	F	-16.1	1	26
3	hM4Di	F	-16	0	26
3	hM4Di	F	-15.9	1	26
3	hM4Di	F	-15.8	0	26
3	hM4Di	F	-15.7	0	26
3	hM4Di	F	-15.6	0	26
3	hM4Di	F	-15.5	0	26
3	hM4Di	F	-15.4	0	26
3	hM4Di	F	-15.3	0	26
3	hM4Di	F	-15.2	2	26
3	hM4Di	F	-15.1	0	26
3	hM4Di	F	-15	0	26
3	hM4Di	F	-14.9	0	27
3	hM4Di	F	-14.8	0	27
3	hM4Di	F	-14.7	0	27
3	hM4Di	F	-14.6	0	27
3	hM4Di	F	-14.5	1	27
3	hM4Di	F	-14.4	0	28
3	hM4Di	F	-14.3	0	28
3	hM4Di	F	-14.2	1	28
3	hM4Di	F	-14.1	0	28
3	hM4Di	F	-14	0	28
3	hM4Di	F	-13.9	1	28
3	hM4Di	F	-13.8	2	28
3	hM4Di	F	-13.7	0	28
3	hM4Di	F	-13.6	0	28
3	hM4Di	F	-13.5	0	28
3	hM4Di	F	-13.4	1	28
3	hM4Di	F	-13.3	0	28
3	hM4Di	F	-13.2	0	28
3	hM4Di	F	-13.1	0	28
3	hM4Di	F	-13	1	28
3	hM4Di	F	-12.9	0	28
3	hM4Di	F	-12.8	0	28
3	hM4Di	F	-12.7	0	28
3	hM4Di	F	-12.6	0	28
3	hM4Di	F	-12.5	0	28
3	hM4Di	F	-12.4	0	28
3	hM4Di	F	-12.3	0	28
3	hM4Di	F	-12.2	0	28
3	hM4Di	F	-12.1	1	28
3	hM4Di	F	-12	0	28
3	hM4Di	F	-11.9	0	28
3	hM4Di	F	-11.8	1	28
3	hM4Di	F	-11.7	1	28
3	hM4Di	F	-11.6	0	28
3	hM4Di	F	-11.5	3	29
3	hM4Di	F	-11.4	1	29
3	hM4Di	F	-11.3	1	29
3	hM4Di	F	-11.2	0	29
3	hM4Di	F	-11.1	0	29
3	hM4Di	F	-11	0	29
3	hM4Di	F	-10.9	0	29
3	hM4Di	F	-10.8	0	29
3	hM4Di	F	-10.7	0	29
3	hM4Di	F	-10.6	0	29
3	hM4Di	F	-10.5	2	29
3	hM4Di	F	-10.4	0	29
3	hM4Di	F	-10.3	0	29
3	hM4Di	F	-10.2	0	29
3	hM4Di	F	-10.1	0	29
3	hM4Di	F	-10	1	29
3	hM4Di	F	-9.9	0	29
3	hM4Di	F	-9.8	0	29
3	hM4Di	F	-9.7	0	29
3	hM4Di	F	-9.6	0	29
3	hM4Di	F	-9.5	0	29
3	hM4Di	F	-9.4	0	29
3	hM4Di	F	-9.3	1	29
3	hM4Di	F	-9.2	0	29
3	hM4Di	F	-9.1	1	29
3	hM4Di	F	-9	0	29
3	hM4Di	F	-8.9	0	29
3	hM4Di	F	-8.8	1	29
3	hM4Di	F	-8.7	0	29
3	hM4Di	F	-8.6	1	29
3	hM4Di	F	-8.5	1	29
3	hM4Di	F	-8.4	1	29
3	hM4Di	F	-8.3	1	29
3	hM4Di	F	-8.2	2	29
3	hM4Di	F	-8.1	0	29
3	hM4Di	F	-8	1	29
3	hM4Di	F	-7.9	0	29
3	hM4Di	F	-7.8	0	29
3	hM4Di	F	-7.7	0	29
3	hM4Di	F	-7.6	0	29
3	hM4Di	F	-7.5	0	29
3	hM4Di	F	-7.4	1	29
3	hM4Di	F	-7.3	0	29
3	hM4Di	F	-7.2	0	29
3	hM4Di	F	-7.1	1	29
3	hM4Di	F	-7	1	29
3	hM4Di	F	-6.9	0	29
3	hM4Di	F	-6.8	0	29
3	hM4Di	F	-6.7	0	29
3	hM4Di	F	-6.6	0	29
3	hM4Di	F	-6.5	1	29
3	hM4Di	F	-6.4	0	29
3	hM4Di	F	-6.3	0	29
3	hM4Di	F	-6.2	0	29
3	hM4Di	F	-6.1	0	29
3	hM4Di	F	-6	0	29
3	hM4Di	F	-5.9	0	29
3	hM4Di	F	-5.8	1	29
3	hM4Di	F	-5.7	1	29
3	hM4Di	F	-5.6	0	29
3	hM4Di	F	-5.5	1	29
3	hM4Di	F	-5.4	2	29
3	hM4Di	F	-5.3	1	29
3	hM4Di	F	-5.2	0	29
3	hM4Di	F	-5.1	0	29
3	hM4Di	F	-5	0	29
3	hM4Di	F	-4.9	0	29
3	hM4Di	F	-4.8	0	29
3	hM4Di	F	-4.7	0	29
3	hM4Di	F	-4.6	1	29
3	hM4Di	F	-4.5	1	29
3	hM4Di	F	-4.4	0	29
3	hM4Di	F	-4.3	1	29
3	hM4Di	F	-4.2	1	29
3	hM4Di	F	-4.1	0	29
3	hM4Di	F	-4	1	29
3	hM4Di	F	-3.9	0	29
3	hM4Di	F	-3.8	2	29
3	hM4Di	F	-3.7	1	29
3	hM4Di	F	-3.6	0	29
3	hM4Di	F	-3.5	1	29
3	hM4Di	F	-3.4	0	29
3	hM4Di	F	-3.3	0	29
3	hM4Di	F	-3.2	2	29
3	hM4Di	F	-3.1	0	29
3	hM4Di	F	-3	0	30
3	hM4Di	F	-2.9	1	30
3	hM4Di	F	-2.8	0	30
3	hM4Di	F	-2.7	0	30
3	hM4Di	F	-2.6	0	30
3	hM4Di	F	-2.5	0	30
3	hM4Di	F	-2.4	1	30
3	hM4Di	F	-2.3	0	30
3	hM4Di	F	-2.2	0	30
3	hM4Di	F	-2.1	0	30
3	hM4Di	F	-2	0	30
3	hM4Di	F	-1.9	0	30
3	hM4Di	F	-1.8	0	30
3	hM4Di	F	-1.7	0	30
3	hM4Di	F	-1.6	1	30
3	hM4Di	F	-1.5	0	30
3	hM4Di	F	-1.4	0	30
3	hM4Di	F	-1.3	0	30
3	hM4Di	F	-1.2	0	30
3	hM4Di	F	-1.1	0	30
3	hM4Di	F	-1	0	30
3	hM4Di	F	-0.9	0	30
3	hM4Di	F	-0.8	1	30
3	hM4Di	F	-0.7	1	30
3	hM4Di	F	-0.6	0	30
3	hM4Di	F	-0.5	0	30
3	hM4Di	F	-0.4	0	30
3	hM4Di	F	-0.3	1	30
3	hM4Di	F	-0.2	0	30
3	hM4Di	F	-0.1	0	30
3	hM4Di	F	0	0	29
3	hM4Di	F	0.1	0	30
3	hM4Di	F	0.2	0	30
3	hM4Di	F	0.3	0	30
3	hM4Di	F	0.4	0	30
3	hM4Di	F	0.5	1	30
3	hM4Di	F	0.6	0	30
3	hM4Di	F	0.7	1	30
3	hM4Di	F	0.8	1	30
3	hM4Di	F	0.9	2	30
3	hM4Di	F	1	1	30
3	hM4Di	F	1.1	1	30
3	hM4Di	F	1.2	0	30
3	hM4Di	F	1.3	1	30
3	hM4Di	F	1.4	0	30
3	hM4Di	F	1.5	0	30
3	hM4Di	F	1.6	0	30
3	hM4Di	F	1.7	0	30
3	hM4Di	F	1.8	0	30
3	hM4Di	F	1.9	1	30
3	hM4Di	F	2	0	30
3	hM4Di	F	2.1	0	30
3	hM4Di	F	2.2	0	30
3	hM4Di	F	2.3	1	30
3	hM4Di	F	2.4	3	30
3	hM4Di	F	2.5	1	30
3	hM4Di	F	2.6	1	30
3	hM4Di	F	2.7	0	30
3	hM4Di	F	2.8	1	30
3	hM4Di	F	2.9	0	30
3	hM4Di	F	3	1	30
3	hM4Di	F	3.1	0	30
3	hM4Di	F	3.2	0	30
3	hM4Di	F	3.3	1	30
3	hM4Di	F	3.4	0	30
3	hM4Di	F	3.5	0	30
3	hM4Di	F	3.6	2	30
3	hM4Di	F	3.7	0	30
3	hM4Di	F	3.8	1	30
3	hM4Di	F	3.9	0	30
3	hM4Di	F	4	1	30
3	hM4Di	F	4.1	0	30
3	hM4Di	F	4.2	0	30
3	hM4Di	F	4.3	3	30
3	hM4Di	F	4.4	1	30
3	hM4Di	F	4.5	0	30
3	hM4Di	F	4.6	1	30
3	hM4Di	F	4.7	0	30
3	hM4Di	F	4.8	0	30
3	hM4Di	F	4.9	0	30
3	hM4Di	F	5	0	30
3	hM4Di	F	5.1	0	30
3	hM4Di	F	5.2	1	30
3	hM4Di	F	5.3	1	30
3	hM4Di	F	5.4	0	30
3	hM4Di	F	5.5	1	30
3	hM4Di	F	5.6	0	30
3	hM4Di	F	5.7	1	30
3	hM4Di	F	5.8	0	30
3	hM4Di	F	5.9	0	30
3	hM4Di	F	6	0	30
3	hM4Di	F	6.1	2	30
3	hM4Di	F	6.2	0	30
3	hM4Di	F	6.3	2	30
3	hM4Di	F	6.4	1	30
3	hM4Di	F	6.5	0	30
3	hM4Di	F	6.6	1	30
3	hM4Di	F	6.7	1	30
3	hM4Di	F	6.8	0	30
3	hM4Di	F	6.9	1	30
3	hM4Di	F	7	0	30
3	hM4Di	F	7.1	0	30
3	hM4Di	F	7.2	0	30
3	hM4Di	F	7.3	0	30
3	hM4Di	F	7.4	1	30
3	hM4Di	F	7.5	0	30
3	hM4Di	F	7.6	0	29
3	hM4Di	F	7.7	0	29
3	hM4Di	F	7.8	1	29
3	hM4Di	F	7.9	0	29
3	hM4Di	F	8	0	29
3	hM4Di	F	8.1	0	29
3	hM4Di	F	8.2	0	29
3	hM4Di	F	8.3	0	29
3	hM4Di	F	8.4	0	29
3	hM4Di	F	8.5	0	29
3	hM4Di	F	8.6	1	29
3	hM4Di	F	8.7	0	29
3	hM4Di	F	8.8	0	29
3	hM4Di	F	8.9	0	29
3	hM4Di	F	9	0	29
3	hM4Di	F	9.1	0	29
3	hM4Di	F	9.2	0	29
3	hM4Di	F	9.3	0	29
3	hM4Di	F	9.4	2	29
3	hM4Di	F	9.5	1	29
3	hM4Di	F	9.6	0	29
3	hM4Di	F	9.7	0	29
3	hM4Di	F	9.8	0	29
3	hM4Di	F	9.9	1	29
3	hM4Di	F	10	0	29
3	hM4Di	F	10.1	1	29
3	hM4Di	F	10.2	1	29
3	hM4Di	F	10.3	1	29
3	hM4Di	F	10.4	0	28
3	hM4Di	F	10.5	0	28
3	hM4Di	F	10.6	0	28
3	hM4Di	F	10.7	0	28
3	hM4Di	F	10.8	0	28
3	hM4Di	F	10.9	0	28
3	hM4Di	F	11	0	28
3	hM4Di	F	11.1	0	27
3	hM4Di	F	11.2	0	27
3	hM4Di	F	11.3	0	27
3	hM4Di	F	11.4	1	27
3	hM4Di	F	11.5	0	27
3	hM4Di	F	11.6	0	27
3	hM4Di	F	11.7	2	27
3	hM4Di	F	11.8	0	27
3	hM4Di	F	11.9	0	27
3	hM4Di	F	12	1	27
3	hM4Di	F	12.1	0	26
3	hM4Di	F	12.2	0	26
3	hM4Di	F	12.3	1	26
3	hM4Di	F	12.4	0	26
3	hM4Di	F	12.5	1	26
3	hM4Di	F	12.6	0	26
3	hM4Di	F	12.7	0	26
3	hM4Di	F	12.8	0	26
3	hM4Di	F	12.9	0	26
3	hM4Di	F	13	1	26
3	hM4Di	F	13.1	0	26
3	hM4Di	F	13.2	0	26
3	hM4Di	F	13.3	0	26
3	hM4Di	F	13.4	0	26
3	hM4Di	F	13.5	1	26
3	hM4Di	F	13.6	0	26
3	hM4Di	F	13.7	0	26
3	hM4Di	F	13.8	2	26
3	hM4Di	F	13.9	0	26
3	hM4Di	F	14	1	26
3	hM4Di	F	14.1	0	26
3	hM4Di	F	14.2	1	25
3	hM4Di	F	14.3	0	25
3	hM4Di	F	14.4	0	25
3	hM4Di	F	14.5	1	25
3	hM4Di	F	14.6	2	24
3	hM4Di	F	14.7	0	24
3	hM4Di	F	14.8	0	24
3	hM4Di	F	14.9	0	24
3	hM4Di	F	15	0	24
3	hM4Di	F	15.1	1	24
3	hM4Di	F	15.2	0	24
3	hM4Di	F	15.3	1	24
3	hM4Di	F	15.4	1	24
3	hM4Di	F	15.5	0	24
3	hM4Di	F	15.6	1	24
3	hM4Di	F	15.7	0	24
3	hM4Di	F	15.8	0	24
3	hM4Di	F	15.9	0	24
3	hM4Di	F	16	0	24
3	hM4Di	F	16.1	0	24
3	hM4Di	F	16.2	0	24
3	hM4Di	F	16.3	0	24
3	hM4Di	F	16.4	0	24
3	hM4Di	F	16.5	2	24
3	hM4Di	F	16.6	0	24
3	hM4Di	F	16.7	0	24
3	hM4Di	F	16.8	0	24
3	hM4Di	F	16.9	0	24
3	hM4Di	F	17	0	24
3	hM4Di	F	17.1	0	24
3	hM4Di	F	17.2	0	24
3	hM4Di	F	17.3	0	24
3	hM4Di	F	17.4	1	24
3	hM4Di	F	17.5	0	24
3	hM4Di	F	17.6	0	24
3	hM4Di	F	17.7	1	24
3	hM4Di	F	17.8	0	24
3	hM4Di	F	17.9	0	24
3	hM4Di	F	18	0	24
3	hM4Di	F	18.1	0	23
3	hM4Di	F	18.2	0	23
3	hM4Di	F	18.3	0	23
3	hM4Di	F	18.4	0	23
3	hM4Di	F	18.5	0	23
3	hM4Di	F	18.6	1	23
3	hM4Di	F	18.7	0	23
3	hM4Di	F	18.8	0	23
3	hM4Di	F	18.9	0	23
3	hM4Di	F	19	0	23
3	hM4Di	F	19.1	0	22
3	hM4Di	F	19.2	0	22
3	hM4Di	F	19.3	0	22
3	hM4Di	F	19.4	0	22
3	hM4Di	F	19.5	0	22
3	hM4Di	F	19.6	1	22
3	hM4Di	F	19.7	1	22
3	hM4Di	F	19.8	1	22
3	hM4Di	F	19.9	0	22
3	hM4Di	F	20	0	22
3	hM4Di	F	20.1	0	22
3	hM4Di	F	20.2	1	22
3	hM4Di	F	20.3	0	22
3	hM4Di	F	20.4	0	22
3	hM4Di	F	20.5	0	22
3	hM4Di	F	20.6	1	22
3	hM4Di	F	20.7	0	22
3	hM4Di	F	20.8	0	22
3	hM4Di	F	20.9	0	22
3	hM4Di	F	21	0	22
3	hM4Di	F	21.1	1	22
3	hM4Di	F	21.2	1	22
3	hM4Di	F	21.3	2	22
3	hM4Di	F	21.4	1	22
3	hM4Di	F	21.5	0	22
3	hM4Di	F	21.6	1	22
3	hM4Di	F	21.7	0	22
3	hM4Di	F	21.8	0	22
3	hM4Di	F	21.9	1	22
3	hM4Di	F	22	0	22
3	hM4Di	F	22.1	0	21
3	hM4Di	F	22.2	0	21
3	hM4Di	F	22.3	0	21
3	hM4Di	F	22.4	2	21
3	hM4Di	F	22.5	0	21
3	hM4Di	F	22.6	1	21
3	hM4Di	F	22.7	0	21
3	hM4Di	F	22.8	0	21
3	hM4Di	F	22.9	1	21
3	hM4Di	F	23	0	21
3	hM4Di	F	23.1	0	21
3	hM4Di	F	23.2	0	21
3	hM4Di	F	23.3	0	21
3	hM4Di	F	23.4	0	21
3	hM4Di	F	23.5	0	21
3	hM4Di	F	23.6	0	21
3	hM4Di	F	23.7	0	21
3	hM4Di	F	23.8	1	21
3	hM4Di	F	23.9	1	21
3	hM4Di	F	24	0	21
3	hM4Di	F	24.1	0	21
3	hM4Di	F	24.2	1	21
3	hM4Di	F	24.3	1	21
3	hM4Di	F	24.4	2	21
3	hM4Di	F	24.5	0	21
3	hM4Di	F	24.6	0	21
3	hM4Di	F	24.7	0	21
3	hM4Di	F	24.8	0	21
3	hM4Di	F	24.9	0	21
3	hM4Di	F	25	0	21
3	hM4Di	F	25.1	1	21
3	hM4Di	F	25.2	0	21
3	hM4Di	F	25.3	0	21
3	hM4Di	F	25.4	0	21
3	hM4Di	F	25.5	0	21
3	hM4Di	F	25.6	1	21
3	hM4Di	F	25.7	1	21
3	hM4Di	F	25.8	0	21
3	hM4Di	F	25.9	0	21
3	hM4Di	F	26	0	21
3	hM4Di	F	26.1	0	21
3	hM4Di	F	26.2	0	21
3	hM4Di	F	26.3	2	21
3	hM4Di	F	26.4	0	21
3	hM4Di	F	26.5	0	21
3	hM4Di	F	26.6	0	21
3	hM4Di	F	26.7	0	21
3	hM4Di	F	26.8	2	21
3	hM4Di	F	26.9	0	21
3	hM4Di	F	27	1	21
3	hM4Di	F	27.1	2	21
3	hM4Di	F	27.2	0	21
3	hM4Di	F	27.3	0	21
3	hM4Di	F	27.4	1	21
3	hM4Di	F	27.5	0	21
3	hM4Di	F	27.6	1	21
3	hM4Di	F	27.7	0	21
3	hM4Di	F	27.8	0	21
3	hM4Di	F	27.9	1	21
3	hM4Di	F	28	0	21
3	hM4Di	F	28.1	0	21
3	hM4Di	F	28.2	0	21
3	hM4Di	F	28.3	0	21
3	hM4Di	F	28.4	0	21
3	hM4Di	F	28.5	1	21
3	hM4Di	F	28.6	0	21
3	hM4Di	F	28.7	1	21
3	hM4Di	F	28.8	0	21
3	hM4Di	F	28.9	0	21
3	hM4Di	F	29	1	21
3	hM4Di	F	29.1	1	21
3	hM4Di	F	29.2	0	21
3	hM4Di	F	29.3	0	21
3	hM4Di	F	29.4	0	21
3	hM4Di	F	29.5	0	21
3	hM4Di	F	29.6	0	21
3	hM4Di	F	29.7	0	21
3	hM4Di	F	29.8	0	21
3	hM4Di	F	29.9	0	21
3	hM4Di	F	30	0	21
4	hM4Di	F	-30	1	17
4	hM4Di	F	-29.9	0	17
4	hM4Di	F	-29.8	0	17
4	hM4Di	F	-29.7	0	17
4	hM4Di	F	-29.6	0	17
4	hM4Di	F	-29.5	0	17
4	hM4Di	F	-29.4	0	17
4	hM4Di	F	-29.3	0	17
4	hM4Di	F	-29.2	1	17
4	hM4Di	F	-29.1	1	17
4	hM4Di	F	-29	0	17
4	hM4Di	F	-28.9	0	17
4	hM4Di	F	-28.8	1	17
4	hM4Di	F	-28.7	0	17
4	hM4Di	F	-28.6	0	17
4	hM4Di	F	-28.5	0	17
4	hM4Di	F	-28.4	0	17
4	hM4Di	F	-28.3	0	17
4	hM4Di	F	-28.2	0	17
4	hM4Di	F	-28.1	0	17
4	hM4Di	F	-28	0	17
4	hM4Di	F	-27.9	0	17
4	hM4Di	F	-27.8	0	17
4	hM4Di	F	-27.7	0	17
4	hM4Di	F	-27.6	0	17
4	hM4Di	F	-27.5	0	17
4	hM4Di	F	-27.4	0	17
4	hM4Di	F	-27.3	0	17
4	hM4Di	F	-27.2	0	17
4	hM4Di	F	-27.1	0	17
4	hM4Di	F	-27	0	17
4	hM4Di	F	-26.9	0	17
4	hM4Di	F	-26.8	1	17
4	hM4Di	F	-26.7	0	17
4	hM4Di	F	-26.6	0	17
4	hM4Di	F	-26.5	0	17
4	hM4Di	F	-26.4	0	17
4	hM4Di	F	-26.3	0	17
4	hM4Di	F	-26.2	0	17
4	hM4Di	F	-26.1	0	17
4	hM4Di	F	-26	0	17
4	hM4Di	F	-25.9	0	17
4	hM4Di	F	-25.8	0	17
4	hM4Di	F	-25.7	0	17
4	hM4Di	F	-25.6	0	17
4	hM4Di	F	-25.5	1	17
4	hM4Di	F	-25.4	0	17
4	hM4Di	F	-25.3	2	17
4	hM4Di	F	-25.2	0	17
4	hM4Di	F	-25.1	1	17
4	hM4Di	F	-25	0	17
4	hM4Di	F	-24.9	1	17
4	hM4Di	F	-24.8	0	17
4	hM4Di	F	-24.7	0	17
4	hM4Di	F	-24.6	1	17
4	hM4Di	F	-24.5	1	17
4	hM4Di	F	-24.4	0	17
4	hM4Di	F	-24.3	1	17
4	hM4Di	F	-24.2	0	17
4	hM4Di	F	-24.1	0	17
4	hM4Di	F	-24	1	17
4	hM4Di	F	-23.9	0	17
4	hM4Di	F	-23.8	1	17
4	hM4Di	F	-23.7	0	17
4	hM4Di	F	-23.6	0	17
4	hM4Di	F	-23.5	3	17
4	hM4Di	F	-23.4	0	17
4	hM4Di	F	-23.3	0	17
4	hM4Di	F	-23.2	0	17
4	hM4Di	F	-23.1	1	17
4	hM4Di	F	-23	0	17
4	hM4Di	F	-22.9	0	17
4	hM4Di	F	-22.8	0	17
4	hM4Di	F	-22.7	0	17
4	hM4Di	F	-22.6	0	17
4	hM4Di	F	-22.5	0	17
4	hM4Di	F	-22.4	0	17
4	hM4Di	F	-22.3	1	17
4	hM4Di	F	-22.2	1	17
4	hM4Di	F	-22.1	0	17
4	hM4Di	F	-22	0	17
4	hM4Di	F	-21.9	0	17
4	hM4Di	F	-21.8	2	17
4	hM4Di	F	-21.7	0	17
4	hM4Di	F	-21.6	0	17
4	hM4Di	F	-21.5	0	17
4	hM4Di	F	-21.4	0	17
4	hM4Di	F	-21.3	0	17
4	hM4Di	F	-21.2	1	17
4	hM4Di	F	-21.1	1	17
4	hM4Di	F	-21	0	17
4	hM4Di	F	-20.9	0	17
4	hM4Di	F	-20.8	3	17
4	hM4Di	F	-20.7	1	17
4	hM4Di	F	-20.6	1	17
4	hM4Di	F	-20.5	1	17
4	hM4Di	F	-20.4	0	17
4	hM4Di	F	-20.3	0	17
4	hM4Di	F	-20.2	0	17
4	hM4Di	F	-20.1	0	17
4	hM4Di	F	-20	0	17
4	hM4Di	F	-19.9	0	17
4	hM4Di	F	-19.8	0	17
4	hM4Di	F	-19.7	0	17
4	hM4Di	F	-19.6	1	17
4	hM4Di	F	-19.5	1	17
4	hM4Di	F	-19.4	0	17
4	hM4Di	F	-19.3	0	17
4	hM4Di	F	-19.2	0	17
4	hM4Di	F	-19.1	1	17
4	hM4Di	F	-19	0	17
4	hM4Di	F	-18.9	1	17
4	hM4Di	F	-18.8	0	17
4	hM4Di	F	-18.7	0	17
4	hM4Di	F	-18.6	0	17
4	hM4Di	F	-18.5	0	17
4	hM4Di	F	-18.4	0	17
4	hM4Di	F	-18.3	0	17
4	hM4Di	F	-18.2	0	17
4	hM4Di	F	-18.1	0	17
4	hM4Di	F	-18	0	17
4	hM4Di	F	-17.9	0	17
4	hM4Di	F	-17.8	0	17
4	hM4Di	F	-17.7	1	17
4	hM4Di	F	-17.6	0	17
4	hM4Di	F	-17.5	0	17
4	hM4Di	F	-17.4	0	17
4	hM4Di	F	-17.3	0	17
4	hM4Di	F	-17.2	1	17
4	hM4Di	F	-17.1	0	17
4	hM4Di	F	-17	0	17
4	hM4Di	F	-16.9	0	17
4	hM4Di	F	-16.8	0	17
4	hM4Di	F	-16.7	0	17
4	hM4Di	F	-16.6	0	17
4	hM4Di	F	-16.5	0	17
4	hM4Di	F	-16.4	0	17
4	hM4Di	F	-16.3	1	17
4	hM4Di	F	-16.2	1	17
4	hM4Di	F	-16.1	0	17
4	hM4Di	F	-16	1	17
4	hM4Di	F	-15.9	0	17
4	hM4Di	F	-15.8	1	17
4	hM4Di	F	-15.7	0	17
4	hM4Di	F	-15.6	0	17
4	hM4Di	F	-15.5	0	17
4	hM4Di	F	-15.4	1	17
4	hM4Di	F	-15.3	0	17
4	hM4Di	F	-15.2	0	17
4	hM4Di	F	-15.1	0	17
4	hM4Di	F	-15	1	17
4	hM4Di	F	-14.9	1	17
4	hM4Di	F	-14.8	1	17
4	hM4Di	F	-14.7	1	17
4	hM4Di	F	-14.6	0	17
4	hM4Di	F	-14.5	0	17
4	hM4Di	F	-14.4	0	17
4	hM4Di	F	-14.3	1	17
4	hM4Di	F	-14.2	0	17
4	hM4Di	F	-14.1	2	17
4	hM4Di	F	-14	0	17
4	hM4Di	F	-13.9	3	17
4	hM4Di	F	-13.8	0	17
4	hM4Di	F	-13.7	0	17
4	hM4Di	F	-13.6	0	17
4	hM4Di	F	-13.5	0	17
4	hM4Di	F	-13.4	0	17
4	hM4Di	F	-13.3	0	17
4	hM4Di	F	-13.2	0	17
4	hM4Di	F	-13.1	1	17
4	hM4Di	F	-13	2	17
4	hM4Di	F	-12.9	1	17
4	hM4Di	F	-12.8	1	17
4	hM4Di	F	-12.7	0	17
4	hM4Di	F	-12.6	2	17
4	hM4Di	F	-12.5	0	17
4	hM4Di	F	-12.4	0	17
4	hM4Di	F	-12.3	0	17
4	hM4Di	F	-12.2	0	17
4	hM4Di	F	-12.1	0	17
4	hM4Di	F	-12	1	17
4	hM4Di	F	-11.9	0	17
4	hM4Di	F	-11.8	0	17
4	hM4Di	F	-11.7	0	17
4	hM4Di	F	-11.6	3	17
4	hM4Di	F	-11.5	1	17
4	hM4Di	F	-11.4	2	17
4	hM4Di	F	-11.3	1	17
4	hM4Di	F	-11.2	0	17
4	hM4Di	F	-11.1	0	17
4	hM4Di	F	-11	1	17
4	hM4Di	F	-10.9	0	17
4	hM4Di	F	-10.8	0	17
4	hM4Di	F	-10.7	0	17
4	hM4Di	F	-10.6	0	17
4	hM4Di	F	-10.5	0	17
4	hM4Di	F	-10.4	0	17
4	hM4Di	F	-10.3	1	17
4	hM4Di	F	-10.2	0	17
4	hM4Di	F	-10.1	0	17
4	hM4Di	F	-10	0	17
4	hM4Di	F	-9.9	1	17
4	hM4Di	F	-9.8	1	17
4	hM4Di	F	-9.7	0	17
4	hM4Di	F	-9.6	0	17
4	hM4Di	F	-9.5	0	17
4	hM4Di	F	-9.4	0	17
4	hM4Di	F	-9.3	0	17
4	hM4Di	F	-9.2	0	17
4	hM4Di	F	-9.1	0	17
4	hM4Di	F	-9	1	17
4	hM4Di	F	-8.9	0	17
4	hM4Di	F	-8.8	0	17
4	hM4Di	F	-8.7	0	17
4	hM4Di	F	-8.6	0	17
4	hM4Di	F	-8.5	0	17
4	hM4Di	F	-8.4	0	17
4	hM4Di	F	-8.3	1	17
4	hM4Di	F	-8.2	0	17
4	hM4Di	F	-8.1	2	17
4	hM4Di	F	-8	0	17
4	hM4Di	F	-7.9	0	17
4	hM4Di	F	-7.8	2	17
4	hM4Di	F	-7.7	0	17
4	hM4Di	F	-7.6	0	17
4	hM4Di	F	-7.5	2	17
4	hM4Di	F	-7.4	1	17
4	hM4Di	F	-7.3	0	17
4	hM4Di	F	-7.2	2	17
4	hM4Di	F	-7.1	0	17
4	hM4Di	F	-7	1	17
4	hM4Di	F	-6.9	2	17
4	hM4Di	F	-6.8	0	17
4	hM4Di	F	-6.7	1	17
4	hM4Di	F	-6.6	1	17
4	hM4Di	F	-6.5	1	17
4	hM4Di	F	-6.4	0	17
4	hM4Di	F	-6.3	1	17
4	hM4Di	F	-6.2	0	17
4	hM4Di	F	-6.1	0	17
4	hM4Di	F	-6	0	17
4	hM4Di	F	-5.9	0	17
4	hM4Di	F	-5.8	0	17
4	hM4Di	F	-5.7	2	17
4	hM4Di	F	-5.6	1	17
4	hM4Di	F	-5.5	0	17
4	hM4Di	F	-5.4	0	17
4	hM4Di	F	-5.3	0	17
4	hM4Di	F	-5.2	0	17
4	hM4Di	F	-5.1	0	17
4	hM4Di	F	-5	2	17
4	hM4Di	F	-4.9	3	17
4	hM4Di	F	-4.8	0	17
4	hM4Di	F	-4.7	1	17
4	hM4Di	F	-4.6	0	17
4	hM4Di	F	-4.5	0	17
4	hM4Di	F	-4.4	0	17
4	hM4Di	F	-4.3	0	17
4	hM4Di	F	-4.2	0	17
4	hM4Di	F	-4.1	0	17
4	hM4Di	F	-4	1	17
4	hM4Di	F	-3.9	1	17
4	hM4Di	F	-3.8	0	17
4	hM4Di	F	-3.7	0	17
4	hM4Di	F	-3.6	2	17
4	hM4Di	F	-3.5	2	17
4	hM4Di	F	-3.4	0	17
4	hM4Di	F	-3.3	2	17
4	hM4Di	F	-3.2	0	17
4	hM4Di	F	-3.1	0	17
4	hM4Di	F	-3	0	17
4	hM4Di	F	-2.9	0	17
4	hM4Di	F	-2.8	0	17
4	hM4Di	F	-2.7	0	17
4	hM4Di	F	-2.6	0	17
4	hM4Di	F	-2.5	1	17
4	hM4Di	F	-2.4	2	17
4	hM4Di	F	-2.3	2	17
4	hM4Di	F	-2.2	1	17
4	hM4Di	F	-2.1	0	17
4	hM4Di	F	-2	1	17
4	hM4Di	F	-1.9	0	17
4	hM4Di	F	-1.8	1	17
4	hM4Di	F	-1.7	0	17
4	hM4Di	F	-1.6	1	17
4	hM4Di	F	-1.5	0	17
4	hM4Di	F	-1.4	0	17
4	hM4Di	F	-1.3	0	17
4	hM4Di	F	-1.2	0	17
4	hM4Di	F	-1.1	1	17
4	hM4Di	F	-1	2	17
4	hM4Di	F	-0.9	0	17
4	hM4Di	F	-0.8	1	17
4	hM4Di	F	-0.7	1	17
4	hM4Di	F	-0.6	0	17
4	hM4Di	F	-0.5	0	17
4	hM4Di	F	-0.4	0	17
4	hM4Di	F	-0.3	0	17
4	hM4Di	F	-0.2	0	17
4	hM4Di	F	-0.1	0	17
4	hM4Di	F	0	0	17
4	hM4Di	F	0.1	0	17
4	hM4Di	F	0.2	0	17
4	hM4Di	F	0.3	0	17
4	hM4Di	F	0.4	0	17
4	hM4Di	F	0.5	0	17
4	hM4Di	F	0.6	0	17
4	hM4Di	F	0.7	2	17
4	hM4Di	F	0.8	0	17
4	hM4Di	F	0.9	0	17
4	hM4Di	F	1	0	17
4	hM4Di	F	1.1	0	17
4	hM4Di	F	1.2	0	17
4	hM4Di	F	1.3	0	17
4	hM4Di	F	1.4	1	17
4	hM4Di	F	1.5	0	17
4	hM4Di	F	1.6	0	17
4	hM4Di	F	1.7	1	17
4	hM4Di	F	1.8	0	17
4	hM4Di	F	1.9	0	17
4	hM4Di	F	2	0	17
4	hM4Di	F	2.1	0	17
4	hM4Di	F	2.2	0	17
4	hM4Di	F	2.3	2	17
4	hM4Di	F	2.4	0	17
4	hM4Di	F	2.5	0	17
4	hM4Di	F	2.6	1	17
4	hM4Di	F	2.7	1	17
4	hM4Di	F	2.8	2	17
4	hM4Di	F	2.9	1	17
4	hM4Di	F	3	0	17
4	hM4Di	F	3.1	0	17
4	hM4Di	F	3.2	0	17
4	hM4Di	F	3.3	0	17
4	hM4Di	F	3.4	0	17
4	hM4Di	F	3.5	2	17
4	hM4Di	F	3.6	0	17
4	hM4Di	F	3.7	0	17
4	hM4Di	F	3.8	0	17
4	hM4Di	F	3.9	0	17
4	hM4Di	F	4	1	17
4	hM4Di	F	4.1	0	17
4	hM4Di	F	4.2	0	17
4	hM4Di	F	4.3	0	17
4	hM4Di	F	4.4	0	17
4	hM4Di	F	4.5	0	17
4	hM4Di	F	4.6	0	17
4	hM4Di	F	4.7	0	17
4	hM4Di	F	4.8	0	17
4	hM4Di	F	4.9	0	17
4	hM4Di	F	5	0	17
4	hM4Di	F	5.1	0	17
4	hM4Di	F	5.2	0	17
4	hM4Di	F	5.3	0	17
4	hM4Di	F	5.4	0	17
4	hM4Di	F	5.5	1	17
4	hM4Di	F	5.6	0	17
4	hM4Di	F	5.7	0	17
4	hM4Di	F	5.8	1	17
4	hM4Di	F	5.9	1	17
4	hM4Di	F	6	0	17
4	hM4Di	F	6.1	1	17
4	hM4Di	F	6.2	0	17
4	hM4Di	F	6.3	0	17
4	hM4Di	F	6.4	0	17
4	hM4Di	F	6.5	0	17
4	hM4Di	F	6.6	0	17
4	hM4Di	F	6.7	1	17
4	hM4Di	F	6.8	0	17
4	hM4Di	F	6.9	0	17
4	hM4Di	F	7	1	17
4	hM4Di	F	7.1	0	17
4	hM4Di	F	7.2	1	17
4	hM4Di	F	7.3	0	17
4	hM4Di	F	7.4	1	17
4	hM4Di	F	7.5	0	17
4	hM4Di	F	7.6	0	17
4	hM4Di	F	7.7	1	17
4	hM4Di	F	7.8	0	17
4	hM4Di	F	7.9	0	17
4	hM4Di	F	8	0	17
4	hM4Di	F	8.1	0	17
4	hM4Di	F	8.2	0	17
4	hM4Di	F	8.3	0	17
4	hM4Di	F	8.4	1	17
4	hM4Di	F	8.5	1	17
4	hM4Di	F	8.6	1	17
4	hM4Di	F	8.7	0	17
4	hM4Di	F	8.8	0	17
4	hM4Di	F	8.9	0	17
4	hM4Di	F	9	0	17
4	hM4Di	F	9.1	1	17
4	hM4Di	F	9.2	0	17
4	hM4Di	F	9.3	0	17
4	hM4Di	F	9.4	0	17
4	hM4Di	F	9.5	1	17
4	hM4Di	F	9.6	2	17
4	hM4Di	F	9.7	0	17
4	hM4Di	F	9.8	0	17
4	hM4Di	F	9.9	1	17
4	hM4Di	F	10	1	17
4	hM4Di	F	10.1	0	17
4	hM4Di	F	10.2	0	17
4	hM4Di	F	10.3	0	17
4	hM4Di	F	10.4	0	17
4	hM4Di	F	10.5	1	17
4	hM4Di	F	10.6	0	17
4	hM4Di	F	10.7	0	17
4	hM4Di	F	10.8	0	17
4	hM4Di	F	10.9	1	17
4	hM4Di	F	11	1	17
4	hM4Di	F	11.1	0	17
4	hM4Di	F	11.2	0	17
4	hM4Di	F	11.3	1	17
4	hM4Di	F	11.4	0	17
4	hM4Di	F	11.5	1	17
4	hM4Di	F	11.6	1	17
4	hM4Di	F	11.7	0	17
4	hM4Di	F	11.8	0	17
4	hM4Di	F	11.9	1	17
4	hM4Di	F	12	0	17
4	hM4Di	F	12.1	0	17
4	hM4Di	F	12.2	2	17
4	hM4Di	F	12.3	0	17
4	hM4Di	F	12.4	0	17
4	hM4Di	F	12.5	0	17
4	hM4Di	F	12.6	0	17
4	hM4Di	F	12.7	0	17
4	hM4Di	F	12.8	2	17
4	hM4Di	F	12.9	0	17
4	hM4Di	F	13	0	17
4	hM4Di	F	13.1	1	17
4	hM4Di	F	13.2	0	17
4	hM4Di	F	13.3	0	17
4	hM4Di	F	13.4	0	17
4	hM4Di	F	13.5	0	17
4	hM4Di	F	13.6	0	17
4	hM4Di	F	13.7	0	17
4	hM4Di	F	13.8	1	17
4	hM4Di	F	13.9	0	17
4	hM4Di	F	14	0	17
4	hM4Di	F	14.1	2	17
4	hM4Di	F	14.2	0	17
4	hM4Di	F	14.3	0	17
4	hM4Di	F	14.4	0	17
4	hM4Di	F	14.5	0	17
4	hM4Di	F	14.6	1	17
4	hM4Di	F	14.7	1	17
4	hM4Di	F	14.8	0	17
4	hM4Di	F	14.9	1	17
4	hM4Di	F	15	0	17
4	hM4Di	F	15.1	1	17
4	hM4Di	F	15.2	0	17
4	hM4Di	F	15.3	0	17
4	hM4Di	F	15.4	0	17
4	hM4Di	F	15.5	2	17
4	hM4Di	F	15.6	0	17
4	hM4Di	F	15.7	1	17
4	hM4Di	F	15.8	2	17
4	hM4Di	F	15.9	0	17
4	hM4Di	F	16	0	17
4	hM4Di	F	16.1	0	17
4	hM4Di	F	16.2	0	17
4	hM4Di	F	16.3	0	16
4	hM4Di	F	16.4	0	16
4	hM4Di	F	16.5	0	16
4	hM4Di	F	16.6	0	16
4	hM4Di	F	16.7	2	16
4	hM4Di	F	16.8	0	16
4	hM4Di	F	16.9	0	16
4	hM4Di	F	17	1	16
4	hM4Di	F	17.1	0	16
4	hM4Di	F	17.2	0	16
4	hM4Di	F	17.3	0	16
4	hM4Di	F	17.4	0	16
4	hM4Di	F	17.5	0	16
4	hM4Di	F	17.6	0	16
4	hM4Di	F	17.7	0	16
4	hM4Di	F	17.8	0	16
4	hM4Di	F	17.9	0	16
4	hM4Di	F	18	0	15
4	hM4Di	F	18.1	0	15
4	hM4Di	F	18.2	0	15
4	hM4Di	F	18.3	1	15
4	hM4Di	F	18.4	0	15
4	hM4Di	F	18.5	0	15
4	hM4Di	F	18.6	1	15
4	hM4Di	F	18.7	0	15
4	hM4Di	F	18.8	1	15
4	hM4Di	F	18.9	0	15
4	hM4Di	F	19	2	15
4	hM4Di	F	19.1	1	15
4	hM4Di	F	19.2	0	15
4	hM4Di	F	19.3	0	15
4	hM4Di	F	19.4	0	15
4	hM4Di	F	19.5	1	15
4	hM4Di	F	19.6	0	15
4	hM4Di	F	19.7	0	15
4	hM4Di	F	19.8	0	15
4	hM4Di	F	19.9	1	15
4	hM4Di	F	20	0	15
4	hM4Di	F	20.1	0	15
4	hM4Di	F	20.2	0	15
4	hM4Di	F	20.3	1	15
4	hM4Di	F	20.4	0	15
4	hM4Di	F	20.5	1	15
4	hM4Di	F	20.6	1	15
4	hM4Di	F	20.7	1	15
4	hM4Di	F	20.8	0	15
4	hM4Di	F	20.9	0	15
4	hM4Di	F	21	0	15
4	hM4Di	F	21.1	0	15
4	hM4Di	F	21.2	1	15
4	hM4Di	F	21.3	0	15
4	hM4Di	F	21.4	1	15
4	hM4Di	F	21.5	0	15
4	hM4Di	F	21.6	1	15
4	hM4Di	F	21.7	0	15
4	hM4Di	F	21.8	2	15
4	hM4Di	F	21.9	0	15
4	hM4Di	F	22	0	15
4	hM4Di	F	22.1	0	15
4	hM4Di	F	22.2	1	15
4	hM4Di	F	22.3	0	15
4	hM4Di	F	22.4	0	15
4	hM4Di	F	22.5	0	15
4	hM4Di	F	22.6	0	15
4	hM4Di	F	22.7	1	15
4	hM4Di	F	22.8	0	15
4	hM4Di	F	22.9	0	15
4	hM4Di	F	23	0	15
4	hM4Di	F	23.1	0	15
4	hM4Di	F	23.2	1	15
4	hM4Di	F	23.3	0	15
4	hM4Di	F	23.4	0	15
4	hM4Di	F	23.5	2	15
4	hM4Di	F	23.6	1	15
4	hM4Di	F	23.7	1	15
4	hM4Di	F	23.8	2	15
4	hM4Di	F	23.9	1	15
4	hM4Di	F	24	0	15
4	hM4Di	F	24.1	1	15
4	hM4Di	F	24.2	0	15
4	hM4Di	F	24.3	0	15
4	hM4Di	F	24.4	0	15
4	hM4Di	F	24.5	1	15
4	hM4Di	F	24.6	0	15
4	hM4Di	F	24.7	0	15
4	hM4Di	F	24.8	1	15
4	hM4Di	F	24.9	0	15
4	hM4Di	F	25	1	15
4	hM4Di	F	25.1	0	15
4	hM4Di	F	25.2	1	15
4	hM4Di	F	25.3	1	15
4	hM4Di	F	25.4	0	15
4	hM4Di	F	25.5	1	15
4	hM4Di	F	25.6	0	15
4	hM4Di	F	25.7	0	15
4	hM4Di	F	25.8	0	15
4	hM4Di	F	25.9	0	15
4	hM4Di	F	26	0	15
4	hM4Di	F	26.1	0	15
4	hM4Di	F	26.2	0	15
4	hM4Di	F	26.3	0	15
4	hM4Di	F	26.4	1	15
4	hM4Di	F	26.5	1	15
4	hM4Di	F	26.6	1	15
4	hM4Di	F	26.7	1	15
4	hM4Di	F	26.8	1	15
4	hM4Di	F	26.9	0	15
4	hM4Di	F	27	0	15
4	hM4Di	F	27.1	1	15
4	hM4Di	F	27.2	0	15
4	hM4Di	F	27.3	0	15
4	hM4Di	F	27.4	0	15
4	hM4Di	F	27.5	0	15
4	hM4Di	F	27.6	0	15
4	hM4Di	F	27.7	0	15
4	hM4Di	F	27.8	0	15
4	hM4Di	F	27.9	0	15
4	hM4Di	F	28	1	15
4	hM4Di	F	28.1	0	15
4	hM4Di	F	28.2	1	15
4	hM4Di	F	28.3	1	15
4	hM4Di	F	28.4	0	15
4	hM4Di	F	28.5	1	15
4	hM4Di	F	28.6	0	15
4	hM4Di	F	28.7	0	15
4	hM4Di	F	28.8	1	15
4	hM4Di	F	28.9	0	15
4	hM4Di	F	29	1	15
4	hM4Di	F	29.1	0	15
4	hM4Di	F	29.2	1	15
4	hM4Di	F	29.3	1	15
4	hM4Di	F	29.4	0	15
4	hM4Di	F	29.5	0	15
4	hM4Di	F	29.6	0	15
4	hM4Di	F	29.7	0	15
4	hM4Di	F	29.8	0	15
4	hM4Di	F	29.9	0	15
4	hM4Di	F	30	0	15
5	mCherry	F	-30	0	22
5	mCherry	F	-29.9	0	22
5	mCherry	F	-29.8	0	23
5	mCherry	F	-29.7	1	23
5	mCherry	F	-29.6	1	23
5	mCherry	F	-29.5	0	23
5	mCherry	F	-29.4	1	23
5	mCherry	F	-29.3	1	23
5	mCherry	F	-29.2	0	23
5	mCherry	F	-29.1	1	23
5	mCherry	F	-29	0	23
5	mCherry	F	-28.9	0	23
5	mCherry	F	-28.8	1	23
5	mCherry	F	-28.7	0	23
5	mCherry	F	-28.6	1	23
5	mCherry	F	-28.5	0	23
5	mCherry	F	-28.4	1	23
5	mCherry	F	-28.3	1	23
5	mCherry	F	-28.2	0	23
5	mCherry	F	-28.1	1	23
5	mCherry	F	-28	1	23
5	mCherry	F	-27.9	1	23
5	mCherry	F	-27.8	0	23
5	mCherry	F	-27.7	1	23
5	mCherry	F	-27.6	0	23
5	mCherry	F	-27.5	1	23
5	mCherry	F	-27.4	2	23
5	mCherry	F	-27.3	0	23
5	mCherry	F	-27.2	2	23
5	mCherry	F	-27.1	0	23
5	mCherry	F	-27	1	23
5	mCherry	F	-26.9	0	23
5	mCherry	F	-26.8	1	23
5	mCherry	F	-26.7	2	23
5	mCherry	F	-26.6	0	23
5	mCherry	F	-26.5	2	23
5	mCherry	F	-26.4	3	23
5	mCherry	F	-26.3	1	23
5	mCherry	F	-26.2	1	23
5	mCherry	F	-26.1	2	23
5	mCherry	F	-26	1	23
5	mCherry	F	-25.9	0	23
5	mCherry	F	-25.8	1	23
5	mCherry	F	-25.7	1	23
5	mCherry	F	-25.6	0	23
5	mCherry	F	-25.5	0	23
5	mCherry	F	-25.4	2	23
5	mCherry	F	-25.3	0	23
5	mCherry	F	-25.2	0	23
5	mCherry	F	-25.1	0	23
5	mCherry	F	-25	1	23
5	mCherry	F	-24.9	0	23
5	mCherry	F	-24.8	3	23
5	mCherry	F	-24.7	0	23
5	mCherry	F	-24.6	0	23
5	mCherry	F	-24.5	0	23
5	mCherry	F	-24.4	0	23
5	mCherry	F	-24.3	0	23
5	mCherry	F	-24.2	1	23
5	mCherry	F	-24.1	0	23
5	mCherry	F	-24	0	23
5	mCherry	F	-23.9	0	23
5	mCherry	F	-23.8	0	23
5	mCherry	F	-23.7	1	23
5	mCherry	F	-23.6	1	23
5	mCherry	F	-23.5	0	23
5	mCherry	F	-23.4	1	23
5	mCherry	F	-23.3	2	23
5	mCherry	F	-23.2	0	23
5	mCherry	F	-23.1	0	23
5	mCherry	F	-23	2	23
5	mCherry	F	-22.9	1	23
5	mCherry	F	-22.8	2	23
5	mCherry	F	-22.7	0	23
5	mCherry	F	-22.6	1	23
5	mCherry	F	-22.5	1	23
5	mCherry	F	-22.4	0	23
5	mCherry	F	-22.3	0	23
5	mCherry	F	-22.2	2	23
5	mCherry	F	-22.1	0	23
5	mCherry	F	-22	4	23
5	mCherry	F	-21.9	0	23
5	mCherry	F	-21.8	0	23
5	mCherry	F	-21.7	0	23
5	mCherry	F	-21.6	2	23
5	mCherry	F	-21.5	0	23
5	mCherry	F	-21.4	1	23
5	mCherry	F	-21.3	2	23
5	mCherry	F	-21.2	1	23
5	mCherry	F	-21.1	1	23
5	mCherry	F	-21	1	23
5	mCherry	F	-20.9	0	23
5	mCherry	F	-20.8	0	23
5	mCherry	F	-20.7	0	23
5	mCherry	F	-20.6	2	23
5	mCherry	F	-20.5	1	23
5	mCherry	F	-20.4	1	23
5	mCherry	F	-20.3	0	23
5	mCherry	F	-20.2	0	23
5	mCherry	F	-20.1	1	23
5	mCherry	F	-20	2	23
5	mCherry	F	-19.9	0	23
5	mCherry	F	-19.8	4	23
5	mCherry	F	-19.7	4	23
5	mCherry	F	-19.6	3	23
5	mCherry	F	-19.5	0	23
5	mCherry	F	-19.4	1	23
5	mCherry	F	-19.3	1	23
5	mCherry	F	-19.2	3	23
5	mCherry	F	-19.1	2	23
5	mCherry	F	-19	0	23
5	mCherry	F	-18.9	1	23
5	mCherry	F	-18.8	2	23
5	mCherry	F	-18.7	1	23
5	mCherry	F	-18.6	1	23
5	mCherry	F	-18.5	0	23
5	mCherry	F	-18.4	1	23
5	mCherry	F	-18.3	1	23
5	mCherry	F	-18.2	1	23
5	mCherry	F	-18.1	0	23
5	mCherry	F	-18	0	23
5	mCherry	F	-17.9	0	23
5	mCherry	F	-17.8	0	23
5	mCherry	F	-17.7	0	23
5	mCherry	F	-17.6	1	23
5	mCherry	F	-17.5	0	23
5	mCherry	F	-17.4	0	23
5	mCherry	F	-17.3	1	23
5	mCherry	F	-17.2	0	23
5	mCherry	F	-17.1	0	23
5	mCherry	F	-17	0	23
5	mCherry	F	-16.9	0	23
5	mCherry	F	-16.8	0	23
5	mCherry	F	-16.7	0	23
5	mCherry	F	-16.6	0	24
5	mCherry	F	-16.5	1	24
5	mCherry	F	-16.4	1	24
5	mCherry	F	-16.3	1	24
5	mCherry	F	-16.2	1	24
5	mCherry	F	-16.1	1	24
5	mCherry	F	-16	5	24
5	mCherry	F	-15.9	1	24
5	mCherry	F	-15.8	1	24
5	mCherry	F	-15.7	1	24
5	mCherry	F	-15.6	0	24
5	mCherry	F	-15.5	1	24
5	mCherry	F	-15.4	0	24
5	mCherry	F	-15.3	0	24
5	mCherry	F	-15.2	0	24
5	mCherry	F	-15.1	0	24
5	mCherry	F	-15	1	24
5	mCherry	F	-14.9	0	24
5	mCherry	F	-14.8	0	24
5	mCherry	F	-14.7	0	24
5	mCherry	F	-14.6	1	24
5	mCherry	F	-14.5	2	24
5	mCherry	F	-14.4	2	24
5	mCherry	F	-14.3	1	24
5	mCherry	F	-14.2	1	24
5	mCherry	F	-14.1	1	24
5	mCherry	F	-14	1	24
5	mCherry	F	-13.9	1	24
5	mCherry	F	-13.8	0	24
5	mCherry	F	-13.7	1	24
5	mCherry	F	-13.6	3	24
5	mCherry	F	-13.5	0	24
5	mCherry	F	-13.4	2	24
5	mCherry	F	-13.3	2	24
5	mCherry	F	-13.2	0	24
5	mCherry	F	-13.1	2	24
5	mCherry	F	-13	4	24
5	mCherry	F	-12.9	3	24
5	mCherry	F	-12.8	2	24
5	mCherry	F	-12.7	3	24
5	mCherry	F	-12.6	2	24
5	mCherry	F	-12.5	1	24
5	mCherry	F	-12.4	2	24
5	mCherry	F	-12.3	3	24
5	mCherry	F	-12.2	1	25
5	mCherry	F	-12.1	2	25
5	mCherry	F	-12	1	25
5	mCherry	F	-11.9	4	25
5	mCherry	F	-11.8	2	25
5	mCherry	F	-11.7	2	25
5	mCherry	F	-11.6	0	25
5	mCherry	F	-11.5	2	25
5	mCherry	F	-11.4	2	25
5	mCherry	F	-11.3	0	25
5	mCherry	F	-11.2	1	25
5	mCherry	F	-11.1	1	25
5	mCherry	F	-11	2	25
5	mCherry	F	-10.9	2	25
5	mCherry	F	-10.8	1	25
5	mCherry	F	-10.7	1	25
5	mCherry	F	-10.6	0	25
5	mCherry	F	-10.5	1	25
[truncated: 44,879 more rows]

## Sheet: Fig3_S1_ITI
Subject	Group	Sex	Bin	MagTimes	Opportunities
1	mCherry	F	-30	1	11
1	mCherry	F	-29.9	0	11
1	mCherry	F	-29.8	0	11
1	mCherry	F	-29.7	1	11
1	mCherry	F	-29.6	0	11
1	mCherry	F	-29.5	1	11
1	mCherry	F	-29.4	0	11
1	mCherry	F	-29.3	0	11
1	mCherry	F	-29.2	0	11
1	mCherry	F	-29.1	0	11
1	mCherry	F	-29	0	11
1	mCherry	F	-28.9	0	11
1	mCherry	F	-28.8	0	11
1	mCherry	F	-28.7	0	11
1	mCherry	F	-28.6	0	11
1	mCherry	F	-28.5	0	11
1	mCherry	F	-28.4	0	11
1	mCherry	F	-28.3	0	11
1	mCherry	F	-28.2	0	11
1	mCherry	F	-28.1	0	11
1	mCherry	F	-28	0	11
1	mCherry	F	-27.9	0	11
1	mCherry	F	-27.8	0	11
1	mCherry	F	-27.7	0	11
1	mCherry	F	-27.6	0	11
1	mCherry	F	-27.5	0	11
1	mCherry	F	-27.4	0	11
1	mCherry	F	-27.3	0	11
1	mCherry	F	-27.2	0	11
1	mCherry	F	-27.1	0	11
1	mCherry	F	-27	0	11
1	mCherry	F	-26.9	0	11
1	mCherry	F	-26.8	0	11
1	mCherry	F	-26.7	0	11
1	mCherry	F	-26.6	0	11
1	mCherry	F	-26.5	0	11
1	mCherry	F	-26.4	0	11
1	mCherry	F	-26.3	0	11
1	mCherry	F	-26.2	0	11
1	mCherry	F	-26.1	0	11
1	mCherry	F	-26	0	11
1	mCherry	F	-25.9	0	11
1	mCherry	F	-25.8	0	11
1	mCherry	F	-25.7	0	11
1	mCherry	F	-25.6	0	11
1	mCherry	F	-25.5	0	11
1	mCherry	F	-25.4	0	11
1	mCherry	F	-25.3	0	11
1	mCherry	F	-25.2	0	11
1	mCherry	F	-25.1	0	11
1	mCherry	F	-25	0	11
1	mCherry	F	-24.9	0	11
1	mCherry	F	-24.8	0	11
1	mCherry	F	-24.7	0	11
1	mCherry	F	-24.6	0	11
1	mCherry	F	-24.5	0	11
1	mCherry	F	-24.4	0	11
1	mCherry	F	-24.3	0	11
1	mCherry	F	-24.2	0	12
1	mCherry	F	-24.1	0	12
1	mCherry	F	-24	0	12
1	mCherry	F	-23.9	0	12
1	mCherry	F	-23.8	0	12
1	mCherry	F	-23.7	0	12
1	mCherry	F	-23.6	0	12
1	mCherry	F	-23.5	0	13
1	mCherry	F	-23.4	0	13
1	mCherry	F	-23.3	0	13
1	mCherry	F	-23.2	0	13
1	mCherry	F	-23.1	0	13
1	mCherry	F	-23	0	13
1	mCherry	F	-22.9	0	13
1	mCherry	F	-22.8	0	13
1	mCherry	F	-22.7	0	13
1	mCherry	F	-22.6	0	13
1	mCherry	F	-22.5	0	13
1	mCherry	F	-22.4	0	13
1	mCherry	F	-22.3	0	13
1	mCherry	F	-22.2	0	13
1	mCherry	F	-22.1	0	13
1	mCherry	F	-22	0	13
1	mCherry	F	-21.9	0	13
1	mCherry	F	-21.8	0	13
1	mCherry	F	-21.7	0	13
1	mCherry	F	-21.6	0	13
1	mCherry	F	-21.5	0	13
1	mCherry	F	-21.4	0	13
1	mCherry	F	-21.3	0	13
1	mCherry	F	-21.2	0	13
1	mCherry	F	-21.1	0	13
1	mCherry	F	-21	0	13
1	mCherry	F	-20.9	0	13
1	mCherry	F	-20.8	2	13
1	mCherry	F	-20.7	1	13
1	mCherry	F	-20.6	0	13
1	mCherry	F	-20.5	0	13
1	mCherry	F	-20.4	1	13
1	mCherry	F	-20.3	2	13
1	mCherry	F	-20.2	1	13
1	mCherry	F	-20.1	2	13
1	mCherry	F	-20	0	13
1	mCherry	F	-19.9	1	13
1	mCherry	F	-19.8	0	13
1	mCherry	F	-19.7	0	13
1	mCherry	F	-19.6	0	13
1	mCherry	F	-19.5	0	13
1	mCherry	F	-19.4	0	13
1	mCherry	F	-19.3	0	13
1	mCherry	F	-19.2	0	13
1	mCherry	F	-19.1	0	13
1	mCherry	F	-19	0	13
1	mCherry	F	-18.9	0	13
1	mCherry	F	-18.8	0	13
1	mCherry	F	-18.7	0	13
1	mCherry	F	-18.6	0	13
1	mCherry	F	-18.5	1	13
1	mCherry	F	-18.4	0	13
1	mCherry	F	-18.3	0	13
1	mCherry	F	-18.2	0	13
1	mCherry	F	-18.1	0	13
1	mCherry	F	-18	0	13
1	mCherry	F	-17.9	0	13
1	mCherry	F	-17.8	0	13
1	mCherry	F	-17.7	0	13
1	mCherry	F	-17.6	0	13
1	mCherry	F	-17.5	0	13
1	mCherry	F	-17.4	0	13
1	mCherry	F	-17.3	0	13
1	mCherry	F	-17.2	0	13
1	mCherry	F	-17.1	0	13
1	mCherry	F	-17	0	13
1	mCherry	F	-16.9	0	13
1	mCherry	F	-16.8	0	13
1	mCherry	F	-16.7	0	13
1	mCherry	F	-16.6	0	13
1	mCherry	F	-16.5	0	13
1	mCherry	F	-16.4	0	13
1	mCherry	F	-16.3	0	13
1	mCherry	F	-16.2	0	13
1	mCherry	F	-16.1	0	13
1	mCherry	F	-16	0	13
1	mCherry	F	-15.9	0	13
1	mCherry	F	-15.8	0	13
1	mCherry	F	-15.7	0	13
1	mCherry	F	-15.6	0	13
1	mCherry	F	-15.5	0	13
1	mCherry	F	-15.4	0	13
1	mCherry	F	-15.3	0	13
1	mCherry	F	-15.2	1	13
1	mCherry	F	-15.1	0	13
1	mCherry	F	-15	0	13
1	mCherry	F	-14.9	2	13
1	mCherry	F	-14.8	0	13
1	mCherry	F	-14.7	0	13
1	mCherry	F	-14.6	0	14
1	mCherry	F	-14.5	1	14
1	mCherry	F	-14.4	0	14
1	mCherry	F	-14.3	0	14
1	mCherry	F	-14.2	1	14
1	mCherry	F	-14.1	0	14
1	mCherry	F	-14	0	14
1	mCherry	F	-13.9	0	14
1	mCherry	F	-13.8	0	14
1	mCherry	F	-13.7	0	14
1	mCherry	F	-13.6	0	14
1	mCherry	F	-13.5	0	14
1	mCherry	F	-13.4	0	14
1	mCherry	F	-13.3	0	14
1	mCherry	F	-13.2	0	14
1	mCherry	F	-13.1	0	14
1	mCherry	F	-13	0	14
1	mCherry	F	-12.9	0	14
1	mCherry	F	-12.8	0	14
1	mCherry	F	-12.7	0	14
1	mCherry	F	-12.6	0	14
1	mCherry	F	-12.5	0	14
1	mCherry	F	-12.4	0	14
1	mCherry	F	-12.3	0	14
1	mCherry	F	-12.2	0	14
1	mCherry	F	-12.1	0	14
1	mCherry	F	-12	0	14
1	mCherry	F	-11.9	0	14
1	mCherry	F	-11.8	0	14
1	mCherry	F	-11.7	0	14
1	mCherry	F	-11.6	0	14
1	mCherry	F	-11.5	0	14
1	mCherry	F	-11.4	0	14
1	mCherry	F	-11.3	2	14
1	mCherry	F	-11.2	1	14
1	mCherry	F	-11.1	1	14
1	mCherry	F	-11	0	14
1	mCherry	F	-10.9	0	14
1	mCherry	F	-10.8	0	14
1	mCherry	F	-10.7	0	14
1	mCherry	F	-10.6	1	14
1	mCherry	F	-10.5	0	14
1	mCherry	F	-10.4	1	14
1	mCherry	F	-10.3	0	14
1	mCherry	F	-10.2	0	14
1	mCherry	F	-10.1	0	14
1	mCherry	F	-10	0	14
1	mCherry	F	-9.9	0	14
1	mCherry	F	-9.8	0	14
1	mCherry	F	-9.7	0	14
1	mCherry	F	-9.6	0	14
1	mCherry	F	-9.5	0	14
1	mCherry	F	-9.4	0	14
1	mCherry	F	-9.3	0	14
1	mCherry	F	-9.2	0	14
1	mCherry	F	-9.1	0	14
1	mCherry	F	-9	0	14
1	mCherry	F	-8.9	0	14
1	mCherry	F	-8.8	0	14
1	mCherry	F	-8.7	0	14
1	mCherry	F	-8.6	0	14
1	mCherry	F	-8.5	0	14
1	mCherry	F	-8.4	0	14
1	mCherry	F	-8.3	0	14
1	mCherry	F	-8.2	0	14
1	mCherry	F	-8.1	0	14
1	mCherry	F	-8	0	14
1	mCherry	F	-7.9	0	14
1	mCherry	F	-7.8	0	14
1	mCherry	F	-7.7	0	14
1	mCherry	F	-7.6	0	14
1	mCherry	F	-7.5	0	14
1	mCherry	F	-7.4	0	14
1	mCherry	F	-7.3	0	14
1	mCherry	F	-7.2	0	14
1	mCherry	F	-7.1	0	14
1	mCherry	F	-7	0	14
1	mCherry	F	-6.9	0	14
1	mCherry	F	-6.8	0	14
1	mCherry	F	-6.7	0	14
1	mCherry	F	-6.6	0	14
1	mCherry	F	-6.5	0	14
1	mCherry	F	-6.4	0	14
1	mCherry	F	-6.3	0	14
1	mCherry	F	-6.2	0	14
1	mCherry	F	-6.1	0	14
1	mCherry	F	-6	0	14
1	mCherry	F	-5.9	0	14
1	mCherry	F	-5.8	0	14
1	mCherry	F	-5.7	0	14
1	mCherry	F	-5.6	1	14
1	mCherry	F	-5.5	0	14
1	mCherry	F	-5.4	1	14
1	mCherry	F	-5.3	0	14
1	mCherry	F	-5.2	1	14
1	mCherry	F	-5.1	1	14
1	mCherry	F	-5	0	14
1	mCherry	F	-4.9	0	14
1	mCherry	F	-4.8	0	14
1	mCherry	F	-4.7	0	14
1	mCherry	F	-4.6	0	14
1	mCherry	F	-4.5	0	14
1	mCherry	F	-4.4	0	14
1	mCherry	F	-4.3	0	14
1	mCherry	F	-4.2	0	14
1	mCherry	F	-4.1	0	14
1	mCherry	F	-4	0	14
1	mCherry	F	-3.9	0	14
1	mCherry	F	-3.8	0	14
1	mCherry	F	-3.7	0	14
1	mCherry	F	-3.6	0	14
1	mCherry	F	-3.5	0	14
1	mCherry	F	-3.4	1	14
1	mCherry	F	-3.3	0	14
1	mCherry	F	-3.2	0	14
1	mCherry	F	-3.1	0	14
1	mCherry	F	-3	0	14
1	mCherry	F	-2.9	0	14
1	mCherry	F	-2.8	0	14
1	mCherry	F	-2.7	0	14
1	mCherry	F	-2.6	0	14
1	mCherry	F	-2.5	0	14
1	mCherry	F	-2.4	0	14
1	mCherry	F	-2.3	0	14
1	mCherry	F	-2.2	0	14
1	mCherry	F	-2.1	0	14
1	mCherry	F	-2	0	14
1	mCherry	F	-1.9	0	14
1	mCherry	F	-1.8	0	14
1	mCherry	F	-1.7	1	14
1	mCherry	F	-1.6	1	14
1	mCherry	F	-1.5	0	14
1	mCherry	F	-1.4	0	14
1	mCherry	F	-1.3	0	14
1	mCherry	F	-1.2	0	14
1	mCherry	F	-1.1	0	14
1	mCherry	F	-1	0	14
1	mCherry	F	-0.9	0	14
1	mCherry	F	-0.8	0	14
1	mCherry	F	-0.7	1	14
1	mCherry	F	-0.6	0	14
1	mCherry	F	-0.5	0	14
1	mCherry	F	-0.4	0	14
1	mCherry	F	-0.3	0	14
1	mCherry	F	-0.2	0	14
1	mCherry	F	-0.1	0	14
1	mCherry	F	0	0	14
1	mCherry	F	0.1	0	14
1	mCherry	F	0.2	0	14
1	mCherry	F	0.3	0	14
1	mCherry	F	0.4	0	14
1	mCherry	F	0.5	1	14
1	mCherry	F	0.6	1	14
1	mCherry	F	0.7	0	14
1	mCherry	F	0.8	1	14
1	mCherry	F	0.9	1	14
1	mCherry	F	1	0	14
1	mCherry	F	1.1	2	14
1	mCherry	F	1.2	0	14
1	mCherry	F	1.3	2	14
1	mCherry	F	1.4	1	14
1	mCherry	F	1.5	1	14
1	mCherry	F	1.6	1	14
1	mCherry	F	1.7	0	14
1	mCherry	F	1.8	4	14
1	mCherry	F	1.9	0	14
1	mCherry	F	2	0	14
1	mCherry	F	2.1	0	14
1	mCherry	F	2.2	0	14
1	mCherry	F	2.3	0	14
1	mCherry	F	2.4	0	14
1	mCherry	F	2.5	1	14
1	mCherry	F	2.6	0	14
1	mCherry	F	2.7	0	14
1	mCherry	F	2.8	0	14
1	mCherry	F	2.9	0	14
1	mCherry	F	3	0	14
1	mCherry	F	3.1	0	14
1	mCherry	F	3.2	0	14
1	mCherry	F	3.3	0	13
1	mCherry	F	3.4	0	13
1	mCherry	F	3.5	0	13
1	mCherry	F	3.6	1	13
1	mCherry	F	3.7	0	13
1	mCherry	F	3.8	0	13
1	mCherry	F	3.9	0	13
1	mCherry	F	4	0	13
1	mCherry	F	4.1	0	13
1	mCherry	F	4.2	0	13
1	mCherry	F	4.3	0	13
1	mCherry	F	4.4	0	13
1	mCherry	F	4.5	0	13
1	mCherry	F	4.6	0	13
1	mCherry	F	4.7	0	13
1	mCherry	F	4.8	0	13
1	mCherry	F	4.9	1	13
1	mCherry	F	5	0	13
1	mCherry	F	5.1	0	13
1	mCherry	F	5.2	0	13
1	mCherry	F	5.3	0	13
1	mCherry	F	5.4	0	13
1	mCherry	F	5.5	0	13
1	mCherry	F	5.6	1	13
1	mCherry	F	5.7	0	13
1	mCherry	F	5.8	0	13
1	mCherry	F	5.9	0	13
1	mCherry	F	6	0	13
1	mCherry	F	6.1	0	13
1	mCherry	F	6.2	1	13
1	mCherry	F	6.3	0	13
1	mCherry	F	6.4	0	13
1	mCherry	F	6.5	0	13
1	mCherry	F	6.6	0	13
1	mCherry	F	6.7	0	13
1	mCherry	F	6.8	0	13
1	mCherry	F	6.9	0	13
1	mCherry	F	7	0	13
1	mCherry	F	7.1	0	13
1	mCherry	F	7.2	0	13
1	mCherry	F	7.3	0	13
1	mCherry	F	7.4	0	13
1	mCherry	F	7.5	0	13
1	mCherry	F	7.6	0	13
1	mCherry	F	7.7	0	13
1	mCherry	F	7.8	0	13
1	mCherry	F	7.9	0	13
1	mCherry	F	8	0	13
1	mCherry	F	8.1	0	13
1	mCherry	F	8.2	0	13
1	mCherry	F	8.3	0	13
1	mCherry	F	8.4	0	13
1	mCherry	F	8.5	0	13
1	mCherry	F	8.6	0	13
1	mCherry	F	8.7	0	13
1	mCherry	F	8.8	1	13
1	mCherry	F	8.9	0	13
1	mCherry	F	9	0	13
1	mCherry	F	9.1	0	13
1	mCherry	F	9.2	0	13
1	mCherry	F	9.3	0	13
1	mCherry	F	9.4	0	13
1	mCherry	F	9.5	0	13
1	mCherry	F	9.6	0	13
1	mCherry	F	9.7	1	13
1	mCherry	F	9.8	0	13
1	mCherry	F	9.9	0	13
1	mCherry	F	10	0	13
1	mCherry	F	10.1	0	13
1	mCherry	F	10.2	1	13
1	mCherry	F	10.3	0	13
1	mCherry	F	10.4	1	13
1	mCherry	F	10.5	0	13
1	mCherry	F	10.6	1	13
1	mCherry	F	10.7	0	13
1	mCherry	F	10.8	0	13
1	mCherry	F	10.9	0	13
1	mCherry	F	11	0	13
1	mCherry	F	11.1	0	13
1	mCherry	F	11.2	0	13
1	mCherry	F	11.3	0	13
1	mCherry	F	11.4	0	13
1	mCherry	F	11.5	0	13
1	mCherry	F	11.6	0	13
1	mCherry	F	11.7	0	13
1	mCherry	F	11.8	0	13
1	mCherry	F	11.9	0	13
1	mCherry	F	12	0	13
1	mCherry	F	12.1	0	13
1	mCherry	F	12.2	0	13
1	mCherry	F	12.3	0	13
1	mCherry	F	12.4	0	13
1	mCherry	F	12.5	0	13
1	mCherry	F	12.6	0	13
1	mCherry	F	12.7	0	13
1	mCherry	F	12.8	0	13
1	mCherry	F	12.9	0	13
1	mCherry	F	13	0	13
1	mCherry	F	13.1	0	13
1	mCherry	F	13.2	0	13
1	mCherry	F	13.3	0	13
1	mCherry	F	13.4	0	13
1	mCherry	F	13.5	0	13
1	mCherry	F	13.6	0	13
1	mCherry	F	13.7	0	13
1	mCherry	F	13.8	0	13
1	mCherry	F	13.9	0	13
1	mCherry	F	14	0	13
1	mCherry	F	14.1	0	13
1	mCherry	F	14.2	0	13
1	mCherry	F	14.3	0	13
1	mCherry	F	14.4	0	13
1	mCherry	F	14.5	0	13
1	mCherry	F	14.6	0	13
1	mCherry	F	14.7	0	13
1	mCherry	F	14.8	0	13
1	mCherry	F	14.9	0	13
1	mCherry	F	15	0	13
1	mCherry	F	15.1	0	13
1	mCherry	F	15.2	0	13
1	mCherry	F	15.3	0	13
1	mCherry	F	15.4	0	13
1	mCherry	F	15.5	0	13
1	mCherry	F	15.6	0	13
1	mCherry	F	15.7	0	13
1	mCherry	F	15.8	1	13
1	mCherry	F	15.9	0	13
1	mCherry	F	16	2	13
1	mCherry	F	16.1	0	13
1	mCherry	F	16.2	0	13
1	mCherry	F	16.3	0	13
1	mCherry	F	16.4	0	13
1	mCherry	F	16.5	0	13
1	mCherry	F	16.6	0	13
1	mCherry	F	16.7	0	13
1	mCherry	F	16.8	0	13
1	mCherry	F	16.9	0	13
1	mCherry	F	17	0	13
1	mCherry	F	17.1	0	13
1	mCherry	F	17.2	0	13
1	mCherry	F	17.3	0	13
1	mCherry	F	17.4	0	13
1	mCherry	F	17.5	0	13
1	mCherry	F	17.6	0	13
1	mCherry	F	17.7	0	13
1	mCherry	F	17.8	1	13
1	mCherry	F	17.9	0	13
1	mCherry	F	18	0	13
1	mCherry	F	18.1	0	13
1	mCherry	F	18.2	0	13
1	mCherry	F	18.3	0	13
1	mCherry	F	18.4	0	13
1	mCherry	F	18.5	0	13
1	mCherry	F	18.6	0	13
1	mCherry	F	18.7	0	13
1	mCherry	F	18.8	0	13
1	mCherry	F	18.9	0	13
1	mCherry	F	19	0	13
1	mCherry	F	19.1	0	13
1	mCherry	F	19.2	0	13
1	mCherry	F	19.3	0	13
1	mCherry	F	19.4	0	13
1	mCherry	F	19.5	0	13
1	mCherry	F	19.6	0	13
1	mCherry	F	19.7	0	13
1	mCherry	F	19.8	1	13
1	mCherry	F	19.9	0	13
1	mCherry	F	20	0	13
1	mCherry	F	20.1	0	13
1	mCherry	F	20.2	0	13
1	mCherry	F	20.3	0	13
1	mCherry	F	20.4	0	13
1	mCherry	F	20.5	0	13
1	mCherry	F	20.6	0	13
1	mCherry	F	20.7	0	13
1	mCherry	F	20.8	0	13
1	mCherry	F	20.9	0	13
1	mCherry	F	21	0	13
1	mCherry	F	21.1	0	13
1	mCherry	F	21.2	0	13
1	mCherry	F	21.3	0	13
1	mCherry	F	21.4	0	13
1	mCherry	F	21.5	0	13
1	mCherry	F	21.6	0	13
1	mCherry	F	21.7	0	13
1	mCherry	F	21.8	0	13
1	mCherry	F	21.9	0	13
1	mCherry	F	22	0	13
1	mCherry	F	22.1	0	13
1	mCherry	F	22.2	0	13
1	mCherry	F	22.3	0	13
1	mCherry	F	22.4	0	13
1	mCherry	F	22.5	0	13
1	mCherry	F	22.6	0	13
1	mCherry	F	22.7	0	13
1	mCherry	F	22.8	0	13
1	mCherry	F	22.9	0	13
1	mCherry	F	23	0	13
1	mCherry	F	23.1	0	13
1	mCherry	F	23.2	0	13
1	mCherry	F	23.3	0	13
1	mCherry	F	23.4	0	13
1	mCherry	F	23.5	0	13
1	mCherry	F	23.6	0	13
1	mCherry	F	23.7	0	13
1	mCherry	F	23.8	0	13
1	mCherry	F	23.9	1	13
1	mCherry	F	24	0	13
1	mCherry	F	24.1	0	13
1	mCherry	F	24.2	0	13
1	mCherry	F	24.3	0	13
1	mCherry	F	24.4	0	13
1	mCherry	F	24.5	0	13
1	mCherry	F	24.6	0	13
1	mCherry	F	24.7	0	13
1	mCherry	F	24.8	0	13
1	mCherry	F	24.9	0	13
1	mCherry	F	25	0	13
1	mCherry	F	25.1	0	13
1	mCherry	F	25.2	0	13
1	mCherry	F	25.3	0	13
1	mCherry	F	25.4	1	13
1	mCherry	F	25.5	1	13
1	mCherry	F	25.6	1	13
1	mCherry	F	25.7	0	13
1	mCherry	F	25.8	0	13
1	mCherry	F	25.9	0	13
1	mCherry	F	26	0	13
1	mCherry	F	26.1	0	13
1	mCherry	F	26.2	0	13
1	mCherry	F	26.3	0	13
1	mCherry	F	26.4	0	13
1	mCherry	F	26.5	0	13
1	mCherry	F	26.6	0	13
1	mCherry	F	26.7	0	13
1	mCherry	F	26.8	0	13
1	mCherry	F	26.9	0	13
1	mCherry	F	27	0	13
1	mCherry	F	27.1	0	13
1	mCherry	F	27.2	0	13
1	mCherry	F	27.3	0	13
1	mCherry	F	27.4	1	13
1	mCherry	F	27.5	0	13
1	mCherry	F	27.6	0	13
1	mCherry	F	27.7	0	13
1	mCherry	F	27.8	0	13
1	mCherry	F	27.9	0	13
1	mCherry	F	28	0	13
1	mCherry	F	28.1	0	13
1	mCherry	F	28.2	0	13
1	mCherry	F	28.3	0	13
1	mCherry	F	28.4	0	13
1	mCherry	F	28.5	0	13
1	mCherry	F	28.6	0	13
1	mCherry	F	28.7	0	13
1	mCherry	F	28.8	0	13
1	mCherry	F	28.9	0	13
1	mCherry	F	29	0	13
1	mCherry	F	29.1	0	13
1	mCherry	F	29.2	0	13
1	mCherry	F	29.3	0	13
1	mCherry	F	29.4	1	13
1	mCherry	F	29.5	0	13
1	mCherry	F	29.6	0	13
1	mCherry	F	29.7	0	13
1	mCherry	F	29.8	0	13
1	mCherry	F	29.9	1	13
1	mCherry	F	30	0	11
3	hM4Di	F	-30	0	14
3	hM4Di	F	-29.9	0	14
3	hM4Di	F	-29.8	0	14
3	hM4Di	F	-29.7	0	14
3	hM4Di	F	-29.6	0	14
3	hM4Di	F	-29.5	0	14
3	hM4Di	F	-29.4	0	14
3	hM4Di	F	-29.3	0	14
3	hM4Di	F	-29.2	0	14
3	hM4Di	F	-29.1	0	14
3	hM4Di	F	-29	0	14
3	hM4Di	F	-28.9	0	14
3	hM4Di	F	-28.8	0	14
3	hM4Di	F	-28.7	0	14
3	hM4Di	F	-28.6	0	14
3	hM4Di	F	-28.5	1	14
3	hM4Di	F	-28.4	1	14
3	hM4Di	F	-28.3	0	14
3	hM4Di	F	-28.2	0	14
3	hM4Di	F	-28.1	0	14
3	hM4Di	F	-28	0	14
3	hM4Di	F	-27.9	0	14
3	hM4Di	F	-27.8	0	14
3	hM4Di	F	-27.7	1	14
3	hM4Di	F	-27.6	1	14
3	hM4Di	F	-27.5	0	14
3	hM4Di	F	-27.4	0	14
3	hM4Di	F	-27.3	0	14
3	hM4Di	F	-27.2	0	14
3	hM4Di	F	-27.1	0	14
3	hM4Di	F	-27	0	14
3	hM4Di	F	-26.9	1	14
3	hM4Di	F	-26.8	0	14
3	hM4Di	F	-26.7	0	15
3	hM4Di	F	-26.6	1	15
3	hM4Di	F	-26.5	0	15
3	hM4Di	F	-26.4	0	15
3	hM4Di	F	-26.3	0	15
3	hM4Di	F	-26.2	0	15
3	hM4Di	F	-26.1	0	15
3	hM4Di	F	-26	0	15
3	hM4Di	F	-25.9	0	15
3	hM4Di	F	-25.8	1	15
3	hM4Di	F	-25.7	0	15
3	hM4Di	F	-25.6	1	15
3	hM4Di	F	-25.5	0	15
3	hM4Di	F	-25.4	0	15
3	hM4Di	F	-25.3	1	15
3	hM4Di	F	-25.2	0	15
3	hM4Di	F	-25.1	2	15
3	hM4Di	F	-25	0	15
3	hM4Di	F	-24.9	1	15
3	hM4Di	F	-24.8	0	15
3	hM4Di	F	-24.7	1	15
3	hM4Di	F	-24.6	0	15
3	hM4Di	F	-24.5	1	15
3	hM4Di	F	-24.4	0	15
3	hM4Di	F	-24.3	1	15
3	hM4Di	F	-24.2	0	15
3	hM4Di	F	-24.1	0	15
3	hM4Di	F	-24	0	15
3	hM4Di	F	-23.9	1	15
3	hM4Di	F	-23.8	0	15
3	hM4Di	F	-23.7	0	15
3	hM4Di	F	-23.6	0	15
3	hM4Di	F	-23.5	0	15
3	hM4Di	F	-23.4	1	15
3	hM4Di	F	-23.3	0	15
3	hM4Di	F	-23.2	0	15
3	hM4Di	F	-23.1	0	15
3	hM4Di	F	-23	0	15
3	hM4Di	F	-22.9	0	15
3	hM4Di	F	-22.8	0	15
3	hM4Di	F	-22.7	0	15
3	hM4Di	F	-22.6	0	15
3	hM4Di	F	-22.5	0	15
3	hM4Di	F	-22.4	0	15
3	hM4Di	F	-22.3	0	15
3	hM4Di	F	-22.2	0	15
3	hM4Di	F	-22.1	0	15
3	hM4Di	F	-22	0	15
3	hM4Di	F	-21.9	0	15
3	hM4Di	F	-21.8	0	15
3	hM4Di	F	-21.7	0	15
3	hM4Di	F	-21.6	0	15
3	hM4Di	F	-21.5	0	15
3	hM4Di	F	-21.4	0	15
3	hM4Di	F	-21.3	0	15
3	hM4Di	F	-21.2	0	15
3	hM4Di	F	-21.1	0	15
3	hM4Di	F	-21	0	15
3	hM4Di	F	-20.9	0	15
3	hM4Di	F	-20.8	0	15
3	hM4Di	F	-20.7	0	15
3	hM4Di	F	-20.6	0	15
3	hM4Di	F	-20.5	0	15
3	hM4Di	F	-20.4	0	15
3	hM4Di	F	-20.3	0	15
3	hM4Di	F	-20.2	0	15
3	hM4Di	F	-20.1	0	15
3	hM4Di	F	-20	0	15
3	hM4Di	F	-19.9	0	15
3	hM4Di	F	-19.8	0	15
3	hM4Di	F	-19.7	0	15
3	hM4Di	F	-19.6	0	15
3	hM4Di	F	-19.5	0	15
3	hM4Di	F	-19.4	0	15
3	hM4Di	F	-19.3	0	15
3	hM4Di	F	-19.2	0	15
3	hM4Di	F	-19.1	0	15
3	hM4Di	F	-19	0	15
3	hM4Di	F	-18.9	0	15
3	hM4Di	F	-18.8	0	15
3	hM4Di	F	-18.7	0	15
3	hM4Di	F	-18.6	0	15
3	hM4Di	F	-18.5	0	15
3	hM4Di	F	-18.4	0	15
3	hM4Di	F	-18.3	0	15
3	hM4Di	F	-18.2	0	15
3	hM4Di	F	-18.1	0	15
3	hM4Di	F	-18	0	15
3	hM4Di	F	-17.9	0	15
3	hM4Di	F	-17.8	0	15
3	hM4Di	F	-17.7	0	15
3	hM4Di	F	-17.6	1	15
3	hM4Di	F	-17.5	0	15
3	hM4Di	F	-17.4	1	15
3	hM4Di	F	-17.3	1	15
3	hM4Di	F	-17.2	0	15
3	hM4Di	F	-17.1	0	15
3	hM4Di	F	-17	0	15
3	hM4Di	F	-16.9	1	15
3	hM4Di	F	-16.8	0	15
3	hM4Di	F	-16.7	0	15
3	hM4Di	F	-16.6	0	15
3	hM4Di	F	-16.5	0	15
3	hM4Di	F	-16.4	0	15
3	hM4Di	F	-16.3	0	15
3	hM4Di	F	-16.2	0	15
3	hM4Di	F	-16.1	0	15
3	hM4Di	F	-16	0	15
3	hM4Di	F	-15.9	0	15
3	hM4Di	F	-15.8	0	15
3	hM4Di	F	-15.7	0	15
3	hM4Di	F	-15.6	0	15
3	hM4Di	F	-15.5	0	15
3	hM4Di	F	-15.4	0	15
3	hM4Di	F	-15.3	0	15
3	hM4Di	F	-15.2	0	15
3	hM4Di	F	-15.1	0	15
3	hM4Di	F	-15	0	15
3	hM4Di	F	-14.9	0	15
3	hM4Di	F	-14.8	0	15
3	hM4Di	F	-14.7	0	15
3	hM4Di	F	-14.6	0	15
3	hM4Di	F	-14.5	0	15
3	hM4Di	F	-14.4	0	15
3	hM4Di	F	-14.3	0	15
3	hM4Di	F	-14.2	0	15
3	hM4Di	F	-14.1	0	15
3	hM4Di	F	-14	0	15
3	hM4Di	F	-13.9	0	15
3	hM4Di	F	-13.8	0	15
3	hM4Di	F	-13.7	0	15
3	hM4Di	F	-13.6	0	15
3	hM4Di	F	-13.5	0	15
3	hM4Di	F	-13.4	0	15
3	hM4Di	F	-13.3	0	15
3	hM4Di	F	-13.2	0	15
3	hM4Di	F	-13.1	0	15
3	hM4Di	F	-13	0	15
3	hM4Di	F	-12.9	1	15
3	hM4Di	F	-12.8	0	15
3	hM4Di	F	-12.7	0	15
3	hM4Di	F	-12.6	0	15
3	hM4Di	F	-12.5	0	15
3	hM4Di	F	-12.4	0	15
3	hM4Di	F	-12.3	0	15
3	hM4Di	F	-12.2	0	15
3	hM4Di	F	-12.1	1	15
3	hM4Di	F	-12	0	15
3	hM4Di	F	-11.9	0	15
3	hM4Di	F	-11.8	0	15
3	hM4Di	F	-11.7	0	15
3	hM4Di	F	-11.6	0	15
3	hM4Di	F	-11.5	0	15
3	hM4Di	F	-11.4	0	15
3	hM4Di	F	-11.3	0	15
3	hM4Di	F	-11.2	0	15
3	hM4Di	F	-11.1	0	15
3	hM4Di	F	-11	0	15
3	hM4Di	F	-10.9	1	15
3	hM4Di	F	-10.8	0	15
3	hM4Di	F	-10.7	0	15
3	hM4Di	F	-10.6	0	15
3	hM4Di	F	-10.5	0	15
3	hM4Di	F	-10.4	0	15
3	hM4Di	F	-10.3	0	15
3	hM4Di	F	-10.2	0	15
3	hM4Di	F	-10.1	0	15
3	hM4Di	F	-10	0	15
3	hM4Di	F	-9.9	1	15
3	hM4Di	F	-9.8	0	15
3	hM4Di	F	-9.7	0	15
3	hM4Di	F	-9.6	0	15
3	hM4Di	F	-9.5	0	15
3	hM4Di	F	-9.4	0	15
3	hM4Di	F	-9.3	0	15
3	hM4Di	F	-9.2	0	15
3	hM4Di	F	-9.1	0	15
3	hM4Di	F	-9	1	15
3	hM4Di	F	-8.9	0	15
3	hM4Di	F	-8.8	0	15
3	hM4Di	F	-8.7	0	15
3	hM4Di	F	-8.6	0	15
3	hM4Di	F	-8.5	0	15
3	hM4Di	F	-8.4	0	15
3	hM4Di	F	-8.3	1	15
3	hM4Di	F	-8.2	1	15
3	hM4Di	F	-8.1	0	15
3	hM4Di	F	-8	0	15
3	hM4Di	F	-7.9	1	15
3	hM4Di	F	-7.8	0	15
3	hM4Di	F	-7.7	0	15
3	hM4Di	F	-7.6	1	15
3	hM4Di	F	-7.5	0	15
3	hM4Di	F	-7.4	1	15
3	hM4Di	F	-7.3	0	15
3	hM4Di	F	-7.2	2	15
3	hM4Di	F	-7.1	1	15
3	hM4Di	F	-7	0	15
3	hM4Di	F	-6.9	0	15
3	hM4Di	F	-6.8	0	15
3	hM4Di	F	-6.7	1	15
3	hM4Di	F	-6.6	0	15
3	hM4Di	F	-6.5	0	15
3	hM4Di	F	-6.4	1	15
3	hM4Di	F	-6.3	0	15
3	hM4Di	F	-6.2	0	15
3	hM4Di	F	-6.1	0	15
3	hM4Di	F	-6	0	15
3	hM4Di	F	-5.9	0	15
3	hM4Di	F	-5.8	0	15
3	hM4Di	F	-5.7	0	15
3	hM4Di	F	-5.6	0	15
3	hM4Di	F	-5.5	0	15
3	hM4Di	F	-5.4	0	15
3	hM4Di	F	-5.3	1	15
3	hM4Di	F	-5.2	1	15
3	hM4Di	F	-5.1	0	15
3	hM4Di	F	-5	0	15
3	hM4Di	F	-4.9	0	15
3	hM4Di	F	-4.8	0	15
3	hM4Di	F	-4.7	0	15
3	hM4Di	F	-4.6	0	15
3	hM4Di	F	-4.5	0	15
3	hM4Di	F	-4.4	0	15
3	hM4Di	F	-4.3	0	15
3	hM4Di	F	-4.2	0	15
3	hM4Di	F	-4.1	0	15
3	hM4Di	F	-4	1	15
3	hM4Di	F	-3.9	0	15
3	hM4Di	F	-3.8	1	15
3	hM4Di	F	-3.7	0	15
3	hM4Di	F	-3.6	1	15
3	hM4Di	F	-3.5	0	15
3	hM4Di	F	-3.4	0	15
3	hM4Di	F	-3.3	0	15
3	hM4Di	F	-3.2	0	15
3	hM4Di	F	-3.1	1	15
3	hM4Di	F	-3	0	15
3	hM4Di	F	-2.9	0	15
3	hM4Di	F	-2.8	0	15
3	hM4Di	F	-2.7	0	15
3	hM4Di	F	-2.6	0	15
3	hM4Di	F	-2.5	0	15
3	hM4Di	F	-2.4	1	15
3	hM4Di	F	-2.3	1	15
3	hM4Di	F	-2.2	0	15
3	hM4Di	F	-2.1	0	15
3	hM4Di	F	-2	0	15
3	hM4Di	F	-1.9	0	15
3	hM4Di	F	-1.8	0	15
3	hM4Di	F	-1.7	0	15
3	hM4Di	F	-1.6	1	15
3	hM4Di	F	-1.5	0	15
3	hM4Di	F	-1.4	0	15
3	hM4Di	F	-1.3	0	15
3	hM4Di	F	-1.2	0	15
3	hM4Di	F	-1.1	0	15
3	hM4Di	F	-1	0	15
3	hM4Di	F	-0.9	0	15
3	hM4Di	F	-0.8	0	15
3	hM4Di	F	-0.7	0	15
3	hM4Di	F	-0.6	0	15
3	hM4Di	F	-0.5	0	15
3	hM4Di	F	-0.4	0	15
3	hM4Di	F	-0.3	0	15
3	hM4Di	F	-0.2	0	15
3	hM4Di	F	-0.1	0	15
3	hM4Di	F	0	0	15
3	hM4Di	F	0.1	0	15
3	hM4Di	F	0.2	0	15
3	hM4Di	F	0.3	0	15
3	hM4Di	F	0.4	0	15
3	hM4Di	F	0.5	0	15
3	hM4Di	F	0.6	1	15
3	hM4Di	F	0.7	0	15
3	hM4Di	F	0.8	0	15
3	hM4Di	F	0.9	1	15
3	hM4Di	F	1	0	15
3	hM4Di	F	1.1	0	15
3	hM4Di	F	1.2	2	15
3	hM4Di	F	1.3	1	15
3	hM4Di	F	1.4	0	15
3	hM4Di	F	1.5	1	15
3	hM4Di	F	1.6	1	15
3	hM4Di	F	1.7	0	15
3	hM4Di	F	1.8	1	15
3	hM4Di	F	1.9	1	15
3	hM4Di	F	2	1	15
3	hM4Di	F	2.1	1	15
3	hM4Di	F	2.2	0	15
3	hM4Di	F	2.3	0	15
3	hM4Di	F	2.4	0	15
3	hM4Di	F	2.5	2	15
3	hM4Di	F	2.6	0	15
3	hM4Di	F	2.7	0	15
3	hM4Di	F	2.8	1	15
3	hM4Di	F	2.9	0	15
3	hM4Di	F	3	0	15
3	hM4Di	F	3.1	0	15
3	hM4Di	F	3.2	0	15
3	hM4Di	F	3.3	1	15
3	hM4Di	F	3.4	1	15
3	hM4Di	F	3.5	0	15
3	hM4Di	F	3.6	0	15
3	hM4Di	F	3.7	0	15
3	hM4Di	F	3.8	1	15
3	hM4Di	F	3.9	0	15
3	hM4Di	F	4	0	15
3	hM4Di	F	4.1	0	15
3	hM4Di	F	4.2	0	15
3	hM4Di	F	4.3	1	15
3	hM4Di	F	4.4	0	15
3	hM4Di	F	4.5	0	15
3	hM4Di	F	4.6	1	15
3	hM4Di	F	4.7	0	15
3	hM4Di	F	4.8	1	15
3	hM4Di	F	4.9	0	15
3	hM4Di	F	5	1	15
3	hM4Di	F	5.1	0	15
3	hM4Di	F	5.2	0	15
3	hM4Di	F	5.3	1	15
3	hM4Di	F	5.4	1	15
3	hM4Di	F	5.5	0	15
3	hM4Di	F	5.6	1	15
3	hM4Di	F	5.7	0	14
3	hM4Di	F	5.8	1	14
3	hM4Di	F	5.9	1	14
3	hM4Di	F	6	0	14
3	hM4Di	F	6.1	0	14
3	hM4Di	F	6.2	0	14
3	hM4Di	F	6.3	1	14
3	hM4Di	F	6.4	0	14
3	hM4Di	F	6.5	1	14
3	hM4Di	F	6.6	0	14
3	hM4Di	F	6.7	0	14
3	hM4Di	F	6.8	1	14
3	hM4Di	F	6.9	0	14
3	hM4Di	F	7	1	14
3	hM4Di	F	7.1	0	14
3	hM4Di	F	7.2	0	14
3	hM4Di	F	7.3	0	14
3	hM4Di	F	7.4	0	14
3	hM4Di	F	7.5	0	14
3	hM4Di	F	7.6	0	14
3	hM4Di	F	7.7	0	14
3	hM4Di	F	7.8	0	14
3	hM4Di	F	7.9	0	14
3	hM4Di	F	8	0	14
3	hM4Di	F	8.1	0	14
3	hM4Di	F	8.2	0	14
3	hM4Di	F	8.3	0	14
3	hM4Di	F	8.4	0	14
3	hM4Di	F	8.5	0	14
3	hM4Di	F	8.6	0	14
3	hM4Di	F	8.7	0	14
3	hM4Di	F	8.8	1	14
3	hM4Di	F	8.9	0	14
3	hM4Di	F	9	0	14
3	hM4Di	F	9.1	0	14
3	hM4Di	F	9.2	0	14
3	hM4Di	F	9.3	0	14
3	hM4Di	F	9.4	0	14
3	hM4Di	F	9.5	1	14
3	hM4Di	F	9.6	0	14
3	hM4Di	F	9.7	1	14
3	hM4Di	F	9.8	0	14
3	hM4Di	F	9.9	0	14
3	hM4Di	F	10	0	14
3	hM4Di	F	10.1	0	14
3	hM4Di	F	10.2	1	14
3	hM4Di	F	10.3	0	14
3	hM4Di	F	10.4	1	14
3	hM4Di	F	10.5	0	14
3	hM4Di	F	10.6	1	14
3	hM4Di	F	10.7	0	14
3	hM4Di	F	10.8	0	14
3	hM4Di	F	10.9	0	14
3	hM4Di	F	11	0	14
3	hM4Di	F	11.1	1	14
3	hM4Di	F	11.2	0	14
3	hM4Di	F	11.3	0	14
3	hM4Di	F	11.4	2	14
3	hM4Di	F	11.5	0	14
3	hM4Di	F	11.6	1	14
3	hM4Di	F	11.7	1	14
3	hM4Di	F	11.8	0	14
3	hM4Di	F	11.9	0	14
3	hM4Di	F	12	0	14
3	hM4Di	F	12.1	0	14
3	hM4Di	F	12.2	1	14
3	hM4Di	F	12.3	0	14
3	hM4Di	F	12.4	0	14
3	hM4Di	F	12.5	0	14
3	hM4Di	F	12.6	0	14
3	hM4Di	F	12.7	0	14
3	hM4Di	F	12.8	0	14
3	hM4Di	F	12.9	0	14
3	hM4Di	F	13	0	14
3	hM4Di	F	13.1	0	14
3	hM4Di	F	13.2	0	14
3	hM4Di	F	13.3	0	14
3	hM4Di	F	13.4	0	14
3	hM4Di	F	13.5	0	14
3	hM4Di	F	13.6	0	14
3	hM4Di	F	13.7	0	14
3	hM4Di	F	13.8	0	14
3	hM4Di	F	13.9	0	14
3	hM4Di	F	14	0	14
3	hM4Di	F	14.1	0	14
3	hM4Di	F	14.2	0	14
3	hM4Di	F	14.3	0	14
3	hM4Di	F	14.4	0	14
3	hM4Di	F	14.5	0	14
3	hM4Di	F	14.6	0	14
3	hM4Di	F	14.7	0	14
3	hM4Di	F	14.8	0	14
3	hM4Di	F	14.9	1	14
3	hM4Di	F	15	0	14
3	hM4Di	F	15.1	0	14
3	hM4Di	F	15.2	0	14
3	hM4Di	F	15.3	1	14
3	hM4Di	F	15.4	0	14
3	hM4Di	F	15.5	1	14
3	hM4Di	F	15.6	0	14
3	hM4Di	F	15.7	1	14
3	hM4Di	F	15.8	0	14
3	hM4Di	F	15.9	0	14
3	hM4Di	F	16	0	14
3	hM4Di	F	16.1	0	14
3	hM4Di	F	16.2	0	14
3	hM4Di	F	16.3	0	14
3	hM4Di	F	16.4	0	14
3	hM4Di	F	16.5	0	14
3	hM4Di	F	16.6	1	14
3	hM4Di	F	16.7	0	14
3	hM4Di	F	16.8	0	14
3	hM4Di	F	16.9	0	14
3	hM4Di	F	17	0	14
3	hM4Di	F	17.1	0	14
3	hM4Di	F	17.2	0	14
3	hM4Di	F	17.3	0	14
3	hM4Di	F	17.4	0	14
3	hM4Di	F	17.5	0	14
3	hM4Di	F	17.6	0	14
3	hM4Di	F	17.7	0	14
3	hM4Di	F	17.8	0	14
3	hM4Di	F	17.9	0	14
3	hM4Di	F	18	0	14
3	hM4Di	F	18.1	0	14
3	hM4Di	F	18.2	0	14
3	hM4Di	F	18.3	0	14
3	hM4Di	F	18.4	0	14
3	hM4Di	F	18.5	0	14
3	hM4Di	F	18.6	0	14
3	hM4Di	F	18.7	0	14
3	hM4Di	F	18.8	0	14
3	hM4Di	F	18.9	0	14
3	hM4Di	F	19	0	14
3	hM4Di	F	19.1	0	14
3	hM4Di	F	19.2	1	14
3	hM4Di	F	19.3	0	14
3	hM4Di	F	19.4	0	14
3	hM4Di	F	19.5	0	14
3	hM4Di	F	19.6	0	14
3	hM4Di	F	19.7	1	14
3	hM4Di	F	19.8	1	14
3	hM4Di	F	19.9	0	14
3	hM4Di	F	20	0	14
3	hM4Di	F	20.1	1	14
3	hM4Di	F	20.2	0	14
3	hM4Di	F	20.3	0	14
3	hM4Di	F	20.4	0	14
3	hM4Di	F	20.5	0	14
3	hM4Di	F	20.6	1	14
3	hM4Di	F	20.7	1	14
3	hM4Di	F	20.8	0	14
3	hM4Di	F	20.9	0	14
3	hM4Di	F	21	0	14
3	hM4Di	F	21.1	0	14
3	hM4Di	F	21.2	0	14
3	hM4Di	F	21.3	0	14
3	hM4Di	F	21.4	0	14
3	hM4Di	F	21.5	0	14
3	hM4Di	F	21.6	0	14
3	hM4Di	F	21.7	0	14
3	hM4Di	F	21.8	0	14
3	hM4Di	F	21.9	0	14
3	hM4Di	F	22	0	14
3	hM4Di	F	22.1	0	14
3	hM4Di	F	22.2	0	14
3	hM4Di	F	22.3	0	14
3	hM4Di	F	22.4	0	14
3	hM4Di	F	22.5	0	14
3	hM4Di	F	22.6	0	14
3	hM4Di	F	22.7	0	14
3	hM4Di	F	22.8	0	14
3	hM4Di	F	22.9	1	14
3	hM4Di	F	23	0	14
3	hM4Di	F	23.1	0	14
3	hM4Di	F	23.2	0	14
3	hM4Di	F	23.3	0	14
3	hM4Di	F	23.4	1	14
3	hM4Di	F	23.5	0	14
3	hM4Di	F	23.6	0	14
3	hM4Di	F	23.7	0	14
3	hM4Di	F	23.8	0	14
3	hM4Di	F	23.9	0	14
3	hM4Di	F	24	0	14
3	hM4Di	F	24.1	0	14
3	hM4Di	F	24.2	0	14
3	hM4Di	F	24.3	1	13
3	hM4Di	F	24.4	0	13
3	hM4Di	F	24.5	0	13
3	hM4Di	F	24.6	0	13
3	hM4Di	F	24.7	1	13
3	hM4Di	F	24.8	0	13
3	hM4Di	F	24.9	0	13
3	hM4Di	F	25	0	12
3	hM4Di	F	25.1	1	12
3	hM4Di	F	25.2	0	12
3	hM4Di	F	25.3	0	12
3	hM4Di	F	25.4	1	12
3	hM4Di	F	25.5	2	12
3	hM4Di	F	25.6	1	12
3	hM4Di	F	25.7	0	12
3	hM4Di	F	25.8	1	12
3	hM4Di	F	25.9	0	12
3	hM4Di	F	26	0	12
3	hM4Di	F	26.1	0	12
3	hM4Di	F	26.2	1	12
3	hM4Di	F	26.3	2	12
3	hM4Di	F	26.4	0	12
3	hM4Di	F	26.5	1	12
3	hM4Di	F	26.6	0	12
3	hM4Di	F	26.7	1	12
3	hM4Di	F	26.8	1	12
3	hM4Di	F	26.9	0	12
3	hM4Di	F	27	0	12
3	hM4Di	F	27.1	0	12
3	hM4Di	F	27.2	2	12
3	hM4Di	F	27.3	0	12
3	hM4Di	F	27.4	0	12
3	hM4Di	F	27.5	0	12
3	hM4Di	F	27.6	1	12
3	hM4Di	F	27.7	0	12
3	hM4Di	F	27.8	0	12
3	hM4Di	F	27.9	1	12
3	hM4Di	F	28	0	12
3	hM4Di	F	28.1	1	12
3	hM4Di	F	28.2	1	12
3	hM4Di	F	28.3	0	12
3	hM4Di	F	28.4	0	12
3	hM4Di	F	28.5	0	12
3	hM4Di	F	28.6	0	12
3	hM4Di	F	28.7	0	12
3	hM4Di	F	28.8	0	12
3	hM4Di	F	28.9	0	12
3	hM4Di	F	29	1	12
3	hM4Di	F	29.1	0	12
3	hM4Di	F	29.2	0	12
3	hM4Di	F	29.3	0	12
3	hM4Di	F	29.4	0	12
3	hM4Di	F	29.5	0	12
3	hM4Di	F	29.6	0	12
3	hM4Di	F	29.7	0	12
3	hM4Di	F	29.8	1	12
3	hM4Di	F	29.9	0	12
3	hM4Di	F	30	0	11
4	hM4Di	F	-30	0	5
4	hM4Di	F	-29.9	0	5
4	hM4Di	F	-29.8	0	5
4	hM4Di	F	-29.7	0	5
4	hM4Di	F	-29.6	0	5
4	hM4Di	F	-29.5	0	5
4	hM4Di	F	-29.4	0	5
4	hM4Di	F	-29.3	0	5
4	hM4Di	F	-29.2	0	5
4	hM4Di	F	-29.1	0	5
4	hM4Di	F	-29	0	5
4	hM4Di	F	-28.9	0	5
4	hM4Di	F	-28.8	0	5
4	hM4Di	F	-28.7	0	5
4	hM4Di	F	-28.6	0	5
4	hM4Di	F	-28.5	0	5
4	hM4Di	F	-28.4	0	5
4	hM4Di	F	-28.3	1	5
4	hM4Di	F	-28.2	0	5
4	hM4Di	F	-28.1	0	5
4	hM4Di	F	-28	0	5
4	hM4Di	F	-27.9	0	5
4	hM4Di	F	-27.8	0	5
4	hM4Di	F	-27.7	0	5
4	hM4Di	F	-27.6	0	5
4	hM4Di	F	-27.5	0	5
4	hM4Di	F	-27.4	0	5
4	hM4Di	F	-27.3	0	5
4	hM4Di	F	-27.2	1	5
4	hM4Di	F	-27.1	1	5
4	hM4Di	F	-27	0	5
4	hM4Di	F	-26.9	0	5
4	hM4Di	F	-26.8	0	5
4	hM4Di	F	-26.7	0	5
4	hM4Di	F	-26.6	0	5
4	hM4Di	F	-26.5	0	5
4	hM4Di	F	-26.4	0	5
4	hM4Di	F	-26.3	0	5
4	hM4Di	F	-26.2	0	5
4	hM4Di	F	-26.1	0	5
4	hM4Di	F	-26	0	5
4	hM4Di	F	-25.9	0	5
4	hM4Di	F	-25.8	0	5
4	hM4Di	F	-25.7	0	5
4	hM4Di	F	-25.6	0	5
4	hM4Di	F	-25.5	0	5
4	hM4Di	F	-25.4	0	5
4	hM4Di	F	-25.3	0	5
4	hM4Di	F	-25.2	0	5
4	hM4Di	F	-25.1	0	5
4	hM4Di	F	-25	0	5
4	hM4Di	F	-24.9	0	5
4	hM4Di	F	-24.8	0	5
4	hM4Di	F	-24.7	0	5
4	hM4Di	F	-24.6	0	5
4	hM4Di	F	-24.5	0	5
4	hM4Di	F	-24.4	0	5
4	hM4Di	F	-24.3	0	5
4	hM4Di	F	-24.2	0	5
4	hM4Di	F	-24.1	0	5
4	hM4Di	F	-24	0	5
4	hM4Di	F	-23.9	0	5
4	hM4Di	F	-23.8	0	5
4	hM4Di	F	-23.7	0	5
4	hM4Di	F	-23.6	0	5
4	hM4Di	F	-23.5	0	5
4	hM4Di	F	-23.4	0	5
4	hM4Di	F	-23.3	0	5
4	hM4Di	F	-23.2	0	5
4	hM4Di	F	-23.1	0	5
4	hM4Di	F	-23	0	5
4	hM4Di	F	-22.9	0	5
4	hM4Di	F	-22.8	0	5
4	hM4Di	F	-22.7	0	5
4	hM4Di	F	-22.6	0	5
4	hM4Di	F	-22.5	0	5
4	hM4Di	F	-22.4	0	5
4	hM4Di	F	-22.3	0	5
4	hM4Di	F	-22.2	0	5
4	hM4Di	F	-22.1	0	5
4	hM4Di	F	-22	0	5
4	hM4Di	F	-21.9	0	5
4	hM4Di	F	-21.8	0	5
4	hM4Di	F	-21.7	0	5
4	hM4Di	F	-21.6	0	5
4	hM4Di	F	-21.5	0	5
4	hM4Di	F	-21.4	0	5
4	hM4Di	F	-21.3	0	5
4	hM4Di	F	-21.2	0	5
4	hM4Di	F	-21.1	0	5
4	hM4Di	F	-21	0	5
4	hM4Di	F	-20.9	0	5
4	hM4Di	F	-20.8	0	5
4	hM4Di	F	-20.7	0	5
4	hM4Di	F	-20.6	0	5
4	hM4Di	F	-20.5	0	5
4	hM4Di	F	-20.4	0	5
4	hM4Di	F	-20.3	0	5
4	hM4Di	F	-20.2	0	5
4	hM4Di	F	-20.1	0	5
4	hM4Di	F	-20	0	5
4	hM4Di	F	-19.9	0	5
4	hM4Di	F	-19.8	1	5
4	hM4Di	F	-19.7	0	5
4	hM4Di	F	-19.6	0	5
4	hM4Di	F	-19.5	0	5
4	hM4Di	F	-19.4	0	5
4	hM4Di	F	-19.3	0	5
4	hM4Di	F	-19.2	0	5
4	hM4Di	F	-19.1	0	5
4	hM4Di	F	-19	0	5
4	hM4Di	F	-18.9	0	5
4	hM4Di	F	-18.8	0	5
4	hM4Di	F	-18.7	0	5
4	hM4Di	F	-18.6	0	5
4	hM4Di	F	-18.5	0	5
4	hM4Di	F	-18.4	1	5
4	hM4Di	F	-18.3	0	5
4	hM4Di	F	-18.2	0	5
4	hM4Di	F	-18.1	0	5
4	hM4Di	F	-18	0	5
4	hM4Di	F	-17.9	1	5
4	hM4Di	F	-17.8	0	5
4	hM4Di	F	-17.7	1	5
4	hM4Di	F	-17.6	1	5
4	hM4Di	F	-17.5	0	5
4	hM4Di	F	-17.4	1	5
4	hM4Di	F	-17.3	0	5
4	hM4Di	F	-17.2	0	5
4	hM4Di	F	-17.1	0	5
4	hM4Di	F	-17	0	5
4	hM4Di	F	-16.9	0	5
4	hM4Di	F	-16.8	0	5
4	hM4Di	F	-16.7	0	5
4	hM4Di	F	-16.6	0	5
4	hM4Di	F	-16.5	0	5
4	hM4Di	F	-16.4	0	5
4	hM4Di	F	-16.3	0	5
4	hM4Di	F	-16.2	0	5
4	hM4Di	F	-16.1	0	5
4	hM4Di	F	-16	1	5
4	hM4Di	F	-15.9	0	5
4	hM4Di	F	-15.8	0	5
4	hM4Di	F	-15.7	0	5
4	hM4Di	F	-15.6	1	6
4	hM4Di	F	-15.5	0	6
4	hM4Di	F	-15.4	0	6
4	hM4Di	F	-15.3	0	6
4	hM4Di	F	-15.2	1	6
4	hM4Di	F	-15.1	0	6
4	hM4Di	F	-15	0	6
4	hM4Di	F	-14.9	0	6
4	hM4Di	F	-14.8	0	6
4	hM4Di	F	-14.7	0	6
4	hM4Di	F	-14.6	0	6
4	hM4Di	F	-14.5	0	6
4	hM4Di	F	-14.4	0	6
4	hM4Di	F	-14.3	0	6
4	hM4Di	F	-14.2	0	6
4	hM4Di	F	-14.1	0	6
4	hM4Di	F	-14	0	6
4	hM4Di	F	-13.9	0	6
4	hM4Di	F	-13.8	0	6
4	hM4Di	F	-13.7	0	6
4	hM4Di	F	-13.6	1	6
4	hM4Di	F	-13.5	0	6
4	hM4Di	F	-13.4	0	6
4	hM4Di	F	-13.3	0	6
4	hM4Di	F	-13.2	0	6
4	hM4Di	F	-13.1	0	6
4	hM4Di	F	-13	0	6
4	hM4Di	F	-12.9	1	6
4	hM4Di	F	-12.8	0	6
4	hM4Di	F	-12.7	0	6
4	hM4Di	F	-12.6	0	6
4	hM4Di	F	-12.5	1	6
4	hM4Di	F	-12.4	0	6
4	hM4Di	F	-12.3	0	6
4	hM4Di	F	-12.2	0	6
4	hM4Di	F	-12.1	0	6
4	hM4Di	F	-12	0	6
4	hM4Di	F	-11.9	0	6
4	hM4Di	F	-11.8	0	6
4	hM4Di	F	-11.7	0	6
4	hM4Di	F	-11.6	0	6
4	hM4Di	F	-11.5	0	6
4	hM4Di	F	-11.4	0	6
4	hM4Di	F	-11.3	0	6
4	hM4Di	F	-11.2	0	6
4	hM4Di	F	-11.1	0	6
4	hM4Di	F	-11	0	6
4	hM4Di	F	-10.9	0	6
4	hM4Di	F	-10.8	0	6
4	hM4Di	F	-10.7	0	6
4	hM4Di	F	-10.6	0	6
4	hM4Di	F	-10.5	0	6
4	hM4Di	F	-10.4	0	6
4	hM4Di	F	-10.3	0	6
4	hM4Di	F	-10.2	0	6
4	hM4Di	F	-10.1	0	6
4	hM4Di	F	-10	0	6
4	hM4Di	F	-9.9	0	6
4	hM4Di	F	-9.8	0	6
4	hM4Di	F	-9.7	0	6
4	hM4Di	F	-9.6	0	6
4	hM4Di	F	-9.5	0	6
4	hM4Di	F	-9.4	0	6
4	hM4Di	F	-9.3	0	6
4	hM4Di	F	-9.2	0	6
4	hM4Di	F	-9.1	0	6
4	hM4Di	F	-9	0	6
4	hM4Di	F	-8.9	0	6
4	hM4Di	F	-8.8	0	6
4	hM4Di	F	-8.7	0	6
4	hM4Di	F	-8.6	0	6
4	hM4Di	F	-8.5	0	6
4	hM4Di	F	-8.4	0	6
4	hM4Di	F	-8.3	0	6
4	hM4Di	F	-8.2	1	6
4	hM4Di	F	-8.1	0	6
4	hM4Di	F	-8	0	6
4	hM4Di	F	-7.9	0	6
4	hM4Di	F	-7.8	0	6
4	hM4Di	F	-7.7	1	6
4	hM4Di	F	-7.6	0	6
4	hM4Di	F	-7.5	0	6
4	hM4Di	F	-7.4	0	6
4	hM4Di	F	-7.3	0	6
4	hM4Di	F	-7.2	0	6
4	hM4Di	F	-7.1	0	6
4	hM4Di	F	-7	1	6
4	hM4Di	F	-6.9	0	6
4	hM4Di	F	-6.8	0	6
4	hM4Di	F	-6.7	0	6
4	hM4Di	F	-6.6	0	6
4	hM4Di	F	-6.5	0	6
4	hM4Di	F	-6.4	0	6
4	hM4Di	F	-6.3	0	6
4	hM4Di	F	-6.2	0	6
4	hM4Di	F	-6.1	0	6
4	hM4Di	F	-6	0	6
4	hM4Di	F	-5.9	1	6
4	hM4Di	F	-5.8	1	6
4	hM4Di	F	-5.7	0	6
4	hM4Di	F	-5.6	0	6
4	hM4Di	F	-5.5	0	6
4	hM4Di	F	-5.4	0	6
4	hM4Di	F	-5.3	0	6
4	hM4Di	F	-5.2	0	6
4	hM4Di	F	-5.1	0	6
4	hM4Di	F	-5	0	6
4	hM4Di	F	-4.9	0	6
4	hM4Di	F	-4.8	0	6
4	hM4Di	F	-4.7	0	6
4	hM4Di	F	-4.6	0	6
4	hM4Di	F	-4.5	0	6
4	hM4Di	F	-4.4	0	6
4	hM4Di	F	-4.3	0	6
4	hM4Di	F	-4.2	0	6
4	hM4Di	F	-4.1	1	6
4	hM4Di	F	-4	0	6
4	hM4Di	F	-3.9	0	6
4	hM4Di	F	-3.8	0	6
4	hM4Di	F	-3.7	0	6
4	hM4Di	F	-3.6	0	6
4	hM4Di	F	-3.5	0	6
4	hM4Di	F	-3.4	0	6
4	hM4Di	F	-3.3	0	6
4	hM4Di	F	-3.2	0	6
4	hM4Di	F	-3.1	0	6
4	hM4Di	F	-3	0	6
4	hM4Di	F	-2.9	0	6
4	hM4Di	F	-2.8	0	6
4	hM4Di	F	-2.7	1	6
4	hM4Di	F	-2.6	0	6
4	hM4Di	F	-2.5	1	6
4	hM4Di	F	-2.4	0	6
4	hM4Di	F	-2.3	2	6
4	hM4Di	F	-2.2	0	6
4	hM4Di	F	-2.1	0	6
4	hM4Di	F	-2	1	6
4	hM4Di	F	-1.9	0	6
4	hM4Di	F	-1.8	0	6
4	hM4Di	F	-1.7	1	6
4	hM4Di	F	-1.6	1	6
4	hM4Di	F	-1.5	0	6
4	hM4Di	F	-1.4	0	6
4	hM4Di	F	-1.3	0	6
4	hM4Di	F	-1.2	0	6
4	hM4Di	F	-1.1	0	6
4	hM4Di	F	-1	0	6
4	hM4Di	F	-0.9	0	6
4	hM4Di	F	-0.8	0	6
4	hM4Di	F	-0.7	0	6
4	hM4Di	F	-0.6	0	6
4	hM4Di	F	-0.5	0	6
4	hM4Di	F	-0.4	0	6
4	hM4Di	F	-0.3	0	6
4	hM4Di	F	-0.2	0	6
4	hM4Di	F	-0.1	0	6
4	hM4Di	F	0	0	6
4	hM4Di	F	0.1	0	6
4	hM4Di	F	0.2	0	6
4	hM4Di	F	0.3	0	6
4	hM4Di	F	0.4	0	6
4	hM4Di	F	0.5	0	6
4	hM4Di	F	0.6	0	6
4	hM4Di	F	0.7	0	6
4	hM4Di	F	0.8	0	6
4	hM4Di	F	0.9	0	6
4	hM4Di	F	1	0	6
4	hM4Di	F	1.1	0	6
4	hM4Di	F	1.2	2	6
4	hM4Di	F	1.3	0	6
4	hM4Di	F	1.4	0	6
4	hM4Di	F	1.5	2	6
4	hM4Di	F	1.6	0	6
4	hM4Di	F	1.7	0	6
4	hM4Di	F	1.8	1	6
4	hM4Di	F	1.9	1	6
4	hM4Di	F	2	0	6
4	hM4Di	F	2.1	0	6
4	hM4Di	F	2.2	0	6
4	hM4Di	F	2.3	1	6
4	hM4Di	F	2.4	0	6
4	hM4Di	F	2.5	0	6
4	hM4Di	F	2.6	1	6
4	hM4Di	F	2.7	0	6
4	hM4Di	F	2.8	0	6
4	hM4Di	F	2.9	1	6
4	hM4Di	F	3	0	6
4	hM4Di	F	3.1	0	6
4	hM4Di	F	3.2	0	6
4	hM4Di	F	3.3	0	6
4	hM4Di	F	3.4	1	6
4	hM4Di	F	3.5	1	6
4	hM4Di	F	3.6	0	6
4	hM4Di	F	3.7	1	6
4	hM4Di	F	3.8	1	6
4	hM4Di	F	3.9	0	6
4	hM4Di	F	4	0	6
4	hM4Di	F	4.1	0	6
4	hM4Di	F	4.2	0	6
4	hM4Di	F	4.3	0	6
4	hM4Di	F	4.4	0	6
4	hM4Di	F	4.5	0	6
4	hM4Di	F	4.6	0	6
4	hM4Di	F	4.7	0	6
4	hM4Di	F	4.8	0	6
4	hM4Di	F	4.9	0	6
4	hM4Di	F	5	0	6
4	hM4Di	F	5.1	0	6
4	hM4Di	F	5.2	0	6
4	hM4Di	F	5.3	1	6
4	hM4Di	F	5.4	0	6
4	hM4Di	F	5.5	0	6
4	hM4Di	F	5.6	0	6
4	hM4Di	F	5.7	1	6
4	hM4Di	F	5.8	0	6
4	hM4Di	F	5.9	0	6
4	hM4Di	F	6	0	6
4	hM4Di	F	6.1	0	6
4	hM4Di	F	6.2	0	6
4	hM4Di	F	6.3	0	6
4	hM4Di	F	6.4	0	6
4	hM4Di	F	6.5	0	6
4	hM4Di	F	6.6	0	6
4	hM4Di	F	6.7	0	6
4	hM4Di	F	6.8	0	6
4	hM4Di	F	6.9	0	6
4	hM4Di	F	7	0	6
4	hM4Di	F	7.1	0	6
4	hM4Di	F	7.2	0	6
4	hM4Di	F	7.3	0	6
4	hM4Di	F	7.4	0	6
4	hM4Di	F	7.5	0	6
4	hM4Di	F	7.6	0	6
4	hM4Di	F	7.7	0	6
4	hM4Di	F	7.8	0	6
4	hM4Di	F	7.9	0	6
4	hM4Di	F	8	0	6
4	hM4Di	F	8.1	0	6
4	hM4Di	F	8.2	0	6
4	hM4Di	F	8.3	0	6
4	hM4Di	F	8.4	1	6
4	hM4Di	F	8.5	0	6
4	hM4Di	F	8.6	0	6
4	hM4Di	F	8.7	1	6
4	hM4Di	F	8.8	0	6
4	hM4Di	F	8.9	0	6
4	hM4Di	F	9	0	6
4	hM4Di	F	9.1	0	6
4	hM4Di	F	9.2	0	6
4	hM4Di	F	9.3	0	6
4	hM4Di	F	9.4	0	6
4	hM4Di	F	9.5	0	6
4	hM4Di	F	9.6	0	6
4	hM4Di	F	9.7	0	6
4	hM4Di	F	9.8	0	6
4	hM4Di	F	9.9	0	6
4	hM4Di	F	10	0	6
4	hM4Di	F	10.1	0	6
4	hM4Di	F	10.2	0	6
4	hM4Di	F	10.3	0	6
4	hM4Di	F	10.4	0	6
4	hM4Di	F	10.5	0	6
4	hM4Di	F	10.6	0	6
4	hM4Di	F	10.7	0	6
4	hM4Di	F	10.8	0	6
4	hM4Di	F	10.9	0	6
4	hM4Di	F	11	0	6
4	hM4Di	F	11.1	0	6
4	hM4Di	F	11.2	0	6
4	hM4Di	F	11.3	0	6
4	hM4Di	F	11.4	0	6
4	hM4Di	F	11.5	0	6
4	hM4Di	F	11.6	0	6
4	hM4Di	F	11.7	0	6
4	hM4Di	F	11.8	0	6
4	hM4Di	F	11.9	0	6
4	hM4Di	F	12	0	6
4	hM4Di	F	12.1	0	6
4	hM4Di	F	12.2	0	6
4	hM4Di	F	12.3	0	6
4	hM4Di	F	12.4	0	6
4	hM4Di	F	12.5	0	6
4	hM4Di	F	12.6	0	6
4	hM4Di	F	12.7	0	6
4	hM4Di	F	12.8	0	6
4	hM4Di	F	12.9	0	6
4	hM4Di	F	13	1	6
4	hM4Di	F	13.1	0	6
4	hM4Di	F	13.2	0	6
4	hM4Di	F	13.3	0	6
4	hM4Di	F	13.4	0	6
4	hM4Di	F	13.5	0	6
4	hM4Di	F	13.6	1	6
4	hM4Di	F	13.7	0	6
4	hM4Di	F	13.8	0	6
4	hM4Di	F	13.9	0	6
4	hM4Di	F	14	0	6
4	hM4Di	F	14.1	0	6
4	hM4Di	F	14.2	0	6
4	hM4Di	F	14.3	0	6
4	hM4Di	F	14.4	0	6
4	hM4Di	F	14.5	0	6
4	hM4Di	F	14.6	0	6
4	hM4Di	F	14.7	0	6
4	hM4Di	F	14.8	0	6
4	hM4Di	F	14.9	0	6
4	hM4Di	F	15	0	6
4	hM4Di	F	15.1	0	6
4	hM4Di	F	15.2	0	6
4	hM4Di	F	15.3	0	6
4	hM4Di	F	15.4	0	6
4	hM4Di	F	15.5	0	6
4	hM4Di	F	15.6	0	6
4	hM4Di	F	15.7	0	6
4	hM4Di	F	15.8	0	6
4	hM4Di	F	15.9	0	6
4	hM4Di	F	16	0	6
4	hM4Di	F	16.1	0	6
4	hM4Di	F	16.2	0	6
4	hM4Di	F	16.3	0	6
4	hM4Di	F	16.4	0	6
4	hM4Di	F	16.5	0	6
4	hM4Di	F	16.6	0	6
4	hM4Di	F	16.7	0	6
4	hM4Di	F	16.8	0	6
4	hM4Di	F	16.9	0	6
4	hM4Di	F	17	0	6
4	hM4Di	F	17.1	0	6
4	hM4Di	F	17.2	1	6
4	hM4Di	F	17.3	0	6
4	hM4Di	F	17.4	0	6
4	hM4Di	F	17.5	0	6
4	hM4Di	F	17.6	0	6
4	hM4Di	F	17.7	0	6
4	hM4Di	F	17.8	0	6
4	hM4Di	F	17.9	0	6
4	hM4Di	F	18	0	6
4	hM4Di	F	18.1	0	6
4	hM4Di	F	18.2	0	6
4	hM4Di	F	18.3	0	6
4	hM4Di	F	18.4	0	6
4	hM4Di	F	18.5	0	6
4	hM4Di	F	18.6	0	6
4	hM4Di	F	18.7	0	6
4	hM4Di	F	18.8	1	6
4	hM4Di	F	18.9	1	6
4	hM4Di	F	19	1	6
4	hM4Di	F	19.1	0	6
4	hM4Di	F	19.2	0	6
4	hM4Di	F	19.3	0	6
4	hM4Di	F	19.4	0	6
4	hM4Di	F	19.5	0	6
4	hM4Di	F	19.6	0	6
4	hM4Di	F	19.7	1	6
4	hM4Di	F	19.8	0	6
4	hM4Di	F	19.9	0	6
4	hM4Di	F	20	0	6
4	hM4Di	F	20.1	0	6
4	hM4Di	F	20.2	0	6
4	hM4Di	F	20.3	0	6
4	hM4Di	F	20.4	0	6
4	hM4Di	F	20.5	0	6
4	hM4Di	F	20.6	0	6
4	hM4Di	F	20.7	0	6
4	hM4Di	F	20.8	0	6
4	hM4Di	F	20.9	0	6
4	hM4Di	F	21	0	6
4	hM4Di	F	21.1	0	6
4	hM4Di	F	21.2	0	6
4	hM4Di	F	21.3	1	6
4	hM4Di	F	21.4	0	6
4	hM4Di	F	21.5	0	6
4	hM4Di	F	21.6	0	6
4	hM4Di	F	21.7	0	6
4	hM4Di	F	21.8	0	6
4	hM4Di	F	21.9	0	6
4	hM4Di	F	22	0	6
4	hM4Di	F	22.1	0	6
4	hM4Di	F	22.2	0	6
4	hM4Di	F	22.3	0	6
4	hM4Di	F	22.4	1	6
4	hM4Di	F	22.5	0	6
4	hM4Di	F	22.6	0	6
4	hM4Di	F	22.7	0	6
4	hM4Di	F	22.8	0	6
4	hM4Di	F	22.9	0	6
4	hM4Di	F	23	0	6
4	hM4Di	F	23.1	0	6
4	hM4Di	F	23.2	0	6
4	hM4Di	F	23.3	0	6
4	hM4Di	F	23.4	0	6
4	hM4Di	F	23.5	0	6
4	hM4Di	F	23.6	0	6
4	hM4Di	F	23.7	0	6
4	hM4Di	F	23.8	0	6
4	hM4Di	F	23.9	0	6
4	hM4Di	F	24	0	6
4	hM4Di	F	24.1	0	6
4	hM4Di	F	24.2	0	6
4	hM4Di	F	24.3	1	6
4	hM4Di	F	24.4	0	6
4	hM4Di	F	24.5	0	6
4	hM4Di	F	24.6	0	6
4	hM4Di	F	24.7	0	6
4	hM4Di	F	24.8	0	6
4	hM4Di	F	24.9	0	6
4	hM4Di	F	25	0	6
4	hM4Di	F	25.1	0	6
4	hM4Di	F	25.2	0	6
4	hM4Di	F	25.3	0	6
4	hM4Di	F	25.4	0	6
4	hM4Di	F	25.5	0	6
4	hM4Di	F	25.6	0	6
4	hM4Di	F	25.7	0	6
4	hM4Di	F	25.8	0	6
4	hM4Di	F	25.9	0	6
4	hM4Di	F	26	0	6
4	hM4Di	F	26.1	0	6
4	hM4Di	F	26.2	0	6
4	hM4Di	F	26.3	0	6
4	hM4Di	F	26.4	0	6
4	hM4Di	F	26.5	0	6
4	hM4Di	F	26.6	0	6
4	hM4Di	F	26.7	0	6
4	hM4Di	F	26.8	0	6
4	hM4Di	F	26.9	0	6
4	hM4Di	F	27	0	6
4	hM4Di	F	27.1	0	6
4	hM4Di	F	27.2	0	6
4	hM4Di	F	27.3	0	6
4	hM4Di	F	27.4	0	6
4	hM4Di	F	27.5	0	6
4	hM4Di	F	27.6	0	6
4	hM4Di	F	27.7	0	6
4	hM4Di	F	27.8	0	6
4	hM4Di	F	27.9	0	6
4	hM4Di	F	28	0	6
4	hM4Di	F	28.1	0	6
4	hM4Di	F	28.2	0	6
4	hM4Di	F	28.3	0	6
4	hM4Di	F	28.4	0	6
4	hM4Di	F	28.5	0	6
4	hM4Di	F	28.6	0	6
4	hM4Di	F	28.7	0	6
4	hM4Di	F	28.8	0	6
4	hM4Di	F	28.9	0	6
4	hM4Di	F	29	0	6
4	hM4Di	F	29.1	0	6
4	hM4Di	F	29.2	0	6
4	hM4Di	F	29.3	0	6
4	hM4Di	F	29.4	0	6
4	hM4Di	F	29.5	0	6
4	hM4Di	F	29.6	0	6
4	hM4Di	F	29.7	0	6
4	hM4Di	F	29.8	0	6
4	hM4Di	F	29.9	0	6
4	hM4Di	F	30	0	5
5	mCherry	F	-30	0	12
5	mCherry	F	-29.9	0	12
5	mCherry	F	-29.8	0	12
5	mCherry	F	-29.7	0	12
5	mCherry	F	-29.6	0	12
5	mCherry	F	-29.5	0	12
5	mCherry	F	-29.4	0	12
5	mCherry	F	-29.3	0	12
5	mCherry	F	-29.2	0	12
5	mCherry	F	-29.1	0	12
5	mCherry	F	-29	0	12
5	mCherry	F	-28.9	0	12
5	mCherry	F	-28.8	0	12
5	mCherry	F	-28.7	0	12
5	mCherry	F	-28.6	0	12
5	mCherry	F	-28.5	0	12
5	mCherry	F	-28.4	0	12
5	mCherry	F	-28.3	0	12
5	mCherry	F	-28.2	0	12
5	mCherry	F	-28.1	0	12
5	mCherry	F	-28	0	12
5	mCherry	F	-27.9	0	12
5	mCherry	F	-27.8	0	12
5	mCherry	F	-27.7	0	12
5	mCherry	F	-27.6	0	12
5	mCherry	F	-27.5	0	12
5	mCherry	F	-27.4	0	12
5	mCherry	F	-27.3	0	12
5	mCherry	F	-27.2	0	12
5	mCherry	F	-27.1	0	12
5	mCherry	F	-27	0	12
5	mCherry	F	-26.9	0	12
5	mCherry	F	-26.8	0	12
5	mCherry	F	-26.7	0	12
5	mCherry	F	-26.6	0	12
5	mCherry	F	-26.5	0	12
5	mCherry	F	-26.4	0	12
5	mCherry	F	-26.3	0	12
5	mCherry	F	-26.2	0	12
5	mCherry	F	-26.1	0	12
5	mCherry	F	-26	0	12
5	mCherry	F	-25.9	0	12
5	mCherry	F	-25.8	0	12
5	mCherry	F	-25.7	0	12
5	mCherry	F	-25.6	0	12
5	mCherry	F	-25.5	0	12
5	mCherry	F	-25.4	0	12
5	mCherry	F	-25.3	0	12
5	mCherry	F	-25.2	0	12
5	mCherry	F	-25.1	0	12
5	mCherry	F	-25	0	12
5	mCherry	F	-24.9	0	12
5	mCherry	F	-24.8	0	12
5	mCherry	F	-24.7	0	12
5	mCherry	F	-24.6	0	12
5	mCherry	F	-24.5	0	12
5	mCherry	F	-24.4	0	12
5	mCherry	F	-24.3	0	12
5	mCherry	F	-24.2	0	12
5	mCherry	F	-24.1	0	12
5	mCherry	F	-24	0	12
5	mCherry	F	-23.9	0	12
5	mCherry	F	-23.8	0	12
5	mCherry	F	-23.7	0	12
5	mCherry	F	-23.6	0	12
5	mCherry	F	-23.5	0	12
5	mCherry	F	-23.4	0	12
5	mCherry	F	-23.3	0	12
5	mCherry	F	-23.2	0	12
5	mCherry	F	-23.1	0	12
5	mCherry	F	-23	0	12
5	mCherry	F	-22.9	0	12
5	mCherry	F	-22.8	0	12
5	mCherry	F	-22.7	0	12
5	mCherry	F	-22.6	0	12
5	mCherry	F	-22.5	0	12
5	mCherry	F	-22.4	0	12
5	mCherry	F	-22.3	0	12
5	mCherry	F	-22.2	0	12
5	mCherry	F	-22.1	0	12
5	mCherry	F	-22	0	12
5	mCherry	F	-21.9	0	12
5	mCherry	F	-21.8	0	12
5	mCherry	F	-21.7	0	12
5	mCherry	F	-21.6	0	12
5	mCherry	F	-21.5	0	12
5	mCherry	F	-21.4	0	12
5	mCherry	F	-21.3	0	12
5	mCherry	F	-21.2	0	12
5	mCherry	F	-21.1	0	12
5	mCherry	F	-21	0	12
5	mCherry	F	-20.9	0	12
5	mCherry	F	-20.8	0	12
5	mCherry	F	-20.7	0	12
5	mCherry	F	-20.6	0	12
5	mCherry	F	-20.5	0	12
5	mCherry	F	-20.4	0	12
5	mCherry	F	-20.3	0	12
5	mCherry	F	-20.2	0	12
5	mCherry	F	-20.1	0	12
5	mCherry	F	-20	0	12
5	mCherry	F	-19.9	0	12
5	mCherry	F	-19.8	0	12
5	mCherry	F	-19.7	0	12
5	mCherry	F	-19.6	0	12
5	mCherry	F	-19.5	0	12
5	mCherry	F	-19.4	0	12
5	mCherry	F	-19.3	0	12
5	mCherry	F	-19.2	0	12
5	mCherry	F	-19.1	0	12
5	mCherry	F	-19	0	12
5	mCherry	F	-18.9	0	12
5	mCherry	F	-18.8	0	12
5	mCherry	F	-18.7	0	12
5	mCherry	F	-18.6	0	12
5	mCherry	F	-18.5	0	12
5	mCherry	F	-18.4	0	12
5	mCherry	F	-18.3	0	12
5	mCherry	F	-18.2	0	12
5	mCherry	F	-18.1	0	12
5	mCherry	F	-18	0	12
5	mCherry	F	-17.9	0	12
5	mCherry	F	-17.8	0	12
5	mCherry	F	-17.7	0	12
5	mCherry	F	-17.6	0	12
5	mCherry	F	-17.5	0	12
5	mCherry	F	-17.4	0	12
5	mCherry	F	-17.3	0	12
5	mCherry	F	-17.2	0	12
5	mCherry	F	-17.1	0	12
5	mCherry	F	-17	0	12
5	mCherry	F	-16.9	0	12
5	mCherry	F	-16.8	0	12
5	mCherry	F	-16.7	0	12
5	mCherry	F	-16.6	0	12
5	mCherry	F	-16.5	0	12
5	mCherry	F	-16.4	0	12
5	mCherry	F	-16.3	0	12
5	mCherry	F	-16.2	0	12
5	mCherry	F	-16.1	0	12
5	mCherry	F	-16	0	12
5	mCherry	F	-15.9	0	12
5	mCherry	F	-15.8	0	12
5	mCherry	F	-15.7	0	12
5	mCherry	F	-15.6	0	12
5	mCherry	F	-15.5	0	12
5	mCherry	F	-15.4	0	12
5	mCherry	F	-15.3	0	12
5	mCherry	F	-15.2	0	12
5	mCherry	F	-15.1	0	12
5	mCherry	F	-15	0	12
5	mCherry	F	-14.9	0	12
5	mCherry	F	-14.8	0	12
5	mCherry	F	-14.7	0	12
5	mCherry	F	-14.6	0	12
5	mCherry	F	-14.5	0	12
5	mCherry	F	-14.4	0	12
5	mCherry	F	-14.3	0	12
5	mCherry	F	-14.2	0	12
5	mCherry	F	-14.1	0	12
5	mCherry	F	-14	0	12
5	mCherry	F	-13.9	0	12
5	mCherry	F	-13.8	0	12
5	mCherry	F	-13.7	0	12
5	mCherry	F	-13.6	0	12
5	mCherry	F	-13.5	1	12
5	mCherry	F	-13.4	0	12
5	mCherry	F	-13.3	0	12
5	mCherry	F	-13.2	0	12
5	mCherry	F	-13.1	0	12
5	mCherry	F	-13	0	12
5	mCherry	F	-12.9	0	12
5	mCherry	F	-12.8	0	12
5	mCherry	F	-12.7	0	12
5	mCherry	F	-12.6	0	12
5	mCherry	F	-12.5	0	12
5	mCherry	F	-12.4	1	12
5	mCherry	F	-12.3	1	12
5	mCherry	F	-12.2	0	12
5	mCherry	F	-12.1	0	12
5	mCherry	F	-12	0	12
5	mCherry	F	-11.9	0	12
5	mCherry	F	-11.8	0	12
5	mCherry	F	-11.7	0	12
5	mCherry	F	-11.6	1	12
5	mCherry	F	-11.5	0	12
5	mCherry	F	-11.4	0	12
5	mCherry	F	-11.3	0	12
5	mCherry	F	-11.2	0	12
5	mCherry	F	-11.1	0	12
5	mCherry	F	-11	0	12
5	mCherry	F	-10.9	0	12
5	mCherry	F	-10.8	1	12
5	mCherry	F	-10.7	0	12
5	mCherry	F	-10.6	0	12
5	mCherry	F	-10.5	0	12
[truncated: 44,879 more rows]

## Sheet: Fig3_S2
Rat	Group	Sex	Drug	PreDurPost	CS	TotalPressesFollowedByApproach
1	mCherry	F	CNO	CS	Paired	5
1	mCherry	F	CNO	CS	Unpaired	1
1	mCherry	F	CNO	Pre	Paired	3
1	mCherry	F	CNO	Pre	Unpaired	4
1	mCherry	F	Veh	CS	Paired	8
1	mCherry	F	Veh	CS	Unpaired	4
1	mCherry	F	Veh	Pre	Paired	4
1	mCherry	F	Veh	Pre	Unpaired	2
3	hM4Di	F	CNO	CS	Paired	3
3	hM4Di	F	CNO	CS	Unpaired	1
3	hM4Di	F	CNO	Pre	Paired	0
3	hM4Di	F	CNO	Pre	Unpaired	0
3	hM4Di	F	Veh	CS	Paired	9
3	hM4Di	F	Veh	CS	Unpaired	5
3	hM4Di	F	Veh	Pre	Paired	8
3	hM4Di	F	Veh	Pre	Unpaired	5
4	hM4Di	F	CNO	CS	Paired	4
4	hM4Di	F	CNO	CS	Unpaired	4
4	hM4Di	F	CNO	Pre	Paired	0
4	hM4Di	F	CNO	Pre	Unpaired	0
4	hM4Di	F	Veh	CS	Paired	3
4	hM4Di	F	Veh	CS	Unpaired	3
4	hM4Di	F	Veh	Pre	Paired	2
4	hM4Di	F	Veh	Pre	Unpaired	3
5	mCherry	F	CNO	CS	Paired	6
5	mCherry	F	CNO	CS	Unpaired	3
5	mCherry	F	CNO	Pre	Paired	6
5	mCherry	F	CNO	Pre	Unpaired	4
5	mCherry	F	Veh	CS	Paired	12
5	mCherry	F	Veh	CS	Unpaired	5
5	mCherry	F	Veh	Pre	Paired	4
5	mCherry	F	Veh	Pre	Unpaired	8
6	mCherry	F	CNO	CS	Paired	20
6	mCherry	F	CNO	CS	Unpaired	11
6	mCherry	F	CNO	Pre	Paired	2
6	mCherry	F	CNO	Pre	Unpaired	6
6	mCherry	F	Veh	CS	Paired	10
6	mCherry	F	Veh	CS	Unpaired	9
6	mCherry	F	Veh	Pre	Paired	3
6	mCherry	F	Veh	Pre	Unpaired	4
7	hM4Di	F	CNO	CS	Paired	27
7	hM4Di	F	CNO	CS	Unpaired	2
7	hM4Di	F	CNO	Pre	Paired	6
7	hM4Di	F	CNO	Pre	Unpaired	2
7	hM4Di	F	Veh	CS	Paired	53
7	hM4Di	F	Veh	CS	Unpaired	6
7	hM4Di	F	Veh	Pre	Paired	12
7	hM4Di	F	Veh	Pre	Unpaired	12
9	mCherry	F	CNO	CS	Paired	11
9	mCherry	F	CNO	CS	Unpaired	2
9	mCherry	F	CNO	Pre	Paired	1
9	mCherry	F	CNO	Pre	Unpaired	2
9	mCherry	F	Veh	CS	Paired	22
9	mCherry	F	Veh	CS	Unpaired	6
9	mCherry	F	Veh	Pre	Paired	1
9	mCherry	F	Veh	Pre	Unpaired	2
10	hM4Di	F	CNO	CS	Paired	6
10	hM4Di	F	CNO	CS	Unpaired	3
10	hM4Di	F	CNO	Pre	Paired	8
10	hM4Di	F	CNO	Pre	Unpaired	2
10	hM4Di	F	Veh	CS	Paired	17
10	hM4Di	F	Veh	CS	Unpaired	5
10	hM4Di	F	Veh	Pre	Paired	3
10	hM4Di	F	Veh	Pre	Unpaired	7
12	hM4Di	M	CNO	CS	Paired	7
12	hM4Di	M	CNO	CS	Unpaired	3
12	hM4Di	M	CNO	Pre	Paired	2
12	hM4Di	M	CNO	Pre	Unpaired	3
12	hM4Di	M	Veh	CS	Paired	3
12	hM4Di	M	Veh	CS	Unpaired	0
12	hM4Di	M	Veh	Pre	Paired	2
12	hM4Di	M	Veh	Pre	Unpaired	2
13	mCherry	M	CNO	CS	Paired	4
13	mCherry	M	CNO	CS	Unpaired	0
13	mCherry	M	CNO	Pre	Paired	0
13	mCherry	M	CNO	Pre	Unpaired	0
13	mCherry	M	Veh	CS	Paired	4
13	mCherry	M	Veh	CS	Unpaired	1
13	mCherry	M	Veh	Pre	Paired	1
13	mCherry	M	Veh	Pre	Unpaired	0
15	mCherry	M	CNO	CS	Paired	9
15	mCherry	M	CNO	CS	Unpaired	3
15	mCherry	M	CNO	Pre	Paired	1
15	mCherry	M	CNO	Pre	Unpaired	5
15	mCherry	M	Veh	CS	Paired	18
15	mCherry	M	Veh	CS	Unpaired	6
15	mCherry	M	Veh	Pre	Paired	13
15	mCherry	M	Veh	Pre	Unpaired	4
16	hM4Di	F	CNO	CS	Paired	5
16	hM4Di	F	CNO	CS	Unpaired	3
16	hM4Di	F	CNO	Pre	Paired	4
16	hM4Di	F	CNO	Pre	Unpaired	0
16	hM4Di	F	Veh	CS	Paired	4
16	hM4Di	F	Veh	CS	Unpaired	4
16	hM4Di	F	Veh	Pre	Paired	2
16	hM4Di	F	Veh	Pre	Unpaired	5
18	hM4Di	F	CNO	CS	Paired	6
18	hM4Di	F	CNO	CS	Unpaired	1
18	hM4Di	F	CNO	Pre	Paired	4
18	hM4Di	F	CNO	Pre	Unpaired	2
18	hM4Di	F	Veh	CS	Paired	7
18	hM4Di	F	Veh	CS	Unpaired	5
18	hM4Di	F	Veh	Pre	Paired	5
18	hM4Di	F	Veh	Pre	Unpaired	3
19	hM4Di	F	CNO	CS	Paired	15
19	hM4Di	F	CNO	CS	Unpaired	3
19	hM4Di	F	CNO	Pre	Paired	0
19	hM4Di	F	CNO	Pre	Unpaired	3
19	hM4Di	F	Veh	CS	Paired	48
19	hM4Di	F	Veh	CS	Unpaired	6
19	hM4Di	F	Veh	Pre	Paired	6
19	hM4Di	F	Veh	Pre	Unpaired	7
20	hM4Di	M	CNO	CS	Paired	5
20	hM4Di	M	CNO	CS	Unpaired	1
20	hM4Di	M	CNO	Pre	Paired	2
20	hM4Di	M	CNO	Pre	Unpaired	2
20	hM4Di	M	Veh	CS	Paired	4
20	hM4Di	M	Veh	CS	Unpaired	2
20	hM4Di	M	Veh	Pre	Paired	4
20	hM4Di	M	Veh	Pre	Unpaired	12
21	hM4Di	M	CNO	CS	Paired	0
21	hM4Di	M	CNO	CS	Unpaired	1
21	hM4Di	M	CNO	Pre	Paired	0
21	hM4Di	M	CNO	Pre	Unpaired	3
21	hM4Di	M	Veh	CS	Paired	0
21	hM4Di	M	Veh	CS	Unpaired	1
21	hM4Di	M	Veh	Pre	Paired	1
21	hM4Di	M	Veh	Pre	Unpaired	0
22	mCherry	M	CNO	CS	Paired	7
22	mCherry	M	CNO	CS	Unpaired	11
22	mCherry	M	CNO	Pre	Paired	4
22	mCherry	M	CNO	Pre	Unpaired	4
22	mCherry	M	Veh	CS	Paired	9
22	mCherry	M	Veh	CS	Unpaired	5
22	mCherry	M	Veh	Pre	Paired	5
22	mCherry	M	Veh	Pre	Unpaired	6
23	mCherry	M	CNO	CS	Paired	11
23	mCherry	M	CNO	CS	Unpaired	3
23	mCherry	M	CNO	Pre	Paired	7
23	mCherry	M	CNO	Pre	Unpaired	2
23	mCherry	M	Veh	CS	Paired	16
23	mCherry	M	Veh	CS	Unpaired	17
23	mCherry	M	Veh	Pre	Paired	7
23	mCherry	M	Veh	Pre	Unpaired	8
31	hM4Di	M	CNO	CS	Paired	30
31	hM4Di	M	CNO	CS	Unpaired	10
31	hM4Di	M	CNO	Pre	Paired	3
31	hM4Di	M	CNO	Pre	Unpaired	3
31	hM4Di	M	Veh	CS	Paired	31
31	hM4Di	M	Veh	CS	Unpaired	13
31	hM4Di	M	Veh	Pre	Paired	5
31	hM4Di	M	Veh	Pre	Unpaired	5
33	hM4Di	M	CNO	CS	Paired	14
33	hM4Di	M	CNO	CS	Unpaired	0
33	hM4Di	M	CNO	Pre	Paired	3
33	hM4Di	M	CNO	Pre	Unpaired	2
33	hM4Di	M	Veh	CS	Paired	15
33	hM4Di	M	Veh	CS	Unpaired	2
33	hM4Di	M	Veh	Pre	Paired	10
33	hM4Di	M	Veh	Pre	Unpaired	3
34	mCherry	M	CNO	CS	Paired	2
34	mCherry	M	CNO	CS	Unpaired	1
34	mCherry	M	CNO	Pre	Paired	2
34	mCherry	M	CNO	Pre	Unpaired	0
34	mCherry	M	Veh	CS	Paired	1
34	mCherry	M	Veh	CS	Unpaired	0
34	mCherry	M	Veh	Pre	Paired	1
34	mCherry	M	Veh	Pre	Unpaired	2
36	mCherry	F	CNO	CS	Paired	5
36	mCherry	F	CNO	CS	Unpaired	4
36	mCherry	F	CNO	Pre	Paired	1
36	mCherry	F	CNO	Pre	Unpaired	3
36	mCherry	F	Veh	CS	Paired	2
36	mCherry	F	Veh	CS	Unpaired	5
36	mCherry	F	Veh	Pre	Paired	4
36	mCherry	F	Veh	Pre	Unpaired	5
37	mCherry	F	CNO	CS	Paired	4
37	mCherry	F	CNO	CS	Unpaired	0
37	mCherry	F	CNO	Pre	Paired	0
37	mCherry	F	CNO	Pre	Unpaired	0
37	mCherry	F	Veh	CS	Paired	10
37	mCherry	F	Veh	CS	Unpaired	1
37	mCherry	F	Veh	Pre	Paired	0
37	mCherry	F	Veh	Pre	Unpaired	0
38	mCherry	F	CNO	CS	Paired	9
38	mCherry	F	CNO	CS	Unpaired	3
38	mCherry	F	CNO	Pre	Paired	1
38	mCherry	F	CNO	Pre	Unpaired	3
38	mCherry	F	Veh	CS	Paired	9
38	mCherry	F	Veh	CS	Unpaired	1
38	mCherry	F	Veh	Pre	Paired	1
38	mCherry	F	Veh	Pre	Unpaired	1
39	hM4Di	M	CNO	CS	Paired	6
39	hM4Di	M	CNO	CS	Unpaired	1
39	hM4Di	M	CNO	Pre	Paired	0
39	hM4Di	M	CNO	Pre	Unpaired	3
39	hM4Di	M	Veh	CS	Paired	22
39	hM4Di	M	Veh	CS	Unpaired	6
39	hM4Di	M	Veh	Pre	Paired	2
39	hM4Di	M	Veh	Pre	Unpaired	2
40	hM4Di	M	CNO	CS	Paired	2
40	hM4Di	M	CNO	CS	Unpaired	1
40	hM4Di	M	CNO	Pre	Paired	2
40	hM4Di	M	CNO	Pre	Unpaired	2
40	hM4Di	M	Veh	CS	Paired	8
40	hM4Di	M	Veh	CS	Unpaired	1
40	hM4Di	M	Veh	Pre	Paired	5
40	hM4Di	M	Veh	Pre	Unpaired	5
41	hM4Di	F	CNO	CS	Paired	3
41	hM4Di	F	CNO	CS	Unpaired	2
41	hM4Di	F	CNO	Pre	Paired	2
41	hM4Di	F	CNO	Pre	Unpaired	1
41	hM4Di	F	Veh	CS	Paired	10
41	hM4Di	F	Veh	CS	Unpaired	1
41	hM4Di	F	Veh	Pre	Paired	0
41	hM4Di	F	Veh	Pre	Unpaired	0
51	hM4Di	M	CNO	CS	Paired	4
51	hM4Di	M	CNO	CS	Unpaired	0
51	hM4Di	M	CNO	Pre	Paired	1
51	hM4Di	M	CNO	Pre	Unpaired	1
51	hM4Di	M	Veh	CS	Paired	3
51	hM4Di	M	Veh	CS	Unpaired	1
51	hM4Di	M	Veh	Pre	Paired	0
51	hM4Di	M	Veh	Pre	Unpaired	1
52	hM4Di	M	CNO	CS	Paired	4
52	hM4Di	M	CNO	CS	Unpaired	4
52	hM4Di	M	CNO	Pre	Paired	5
52	hM4Di	M	CNO	Pre	Unpaired	6
52	hM4Di	M	Veh	CS	Paired	9
52	hM4Di	M	Veh	CS	Unpaired	1
52	hM4Di	M	Veh	Pre	Paired	10
52	hM4Di	M	Veh	Pre	Unpaired	2
53	hM4Di	M	CNO	CS	Paired	7
53	hM4Di	M	CNO	CS	Unpaired	0
53	hM4Di	M	CNO	Pre	Paired	0
53	hM4Di	M	CNO	Pre	Unpaired	0
53	hM4Di	M	Veh	CS	Paired	8
53	hM4Di	M	Veh	CS	Unpaired	0
53	hM4Di	M	Veh	Pre	Paired	0
53	hM4Di	M	Veh	Pre	Unpaired	0
57	mCherry	M	CNO	CS	Paired	9
57	mCherry	M	CNO	CS	Unpaired	0
57	mCherry	M	CNO	Pre	Paired	1
57	mCherry	M	CNO	Pre	Unpaired	1
57	mCherry	M	Veh	CS	Paired	4
57	mCherry	M	Veh	CS	Unpaired	0
57	mCherry	M	Veh	Pre	Paired	0
57	mCherry	M	Veh	Pre	Unpaired	3
58	mCherry	M	CNO	CS	Paired	11
58	mCherry	M	CNO	CS	Unpaired	1
58	mCherry	M	CNO	Pre	Paired	2
58	mCherry	M	CNO	Pre	Unpaired	3
58	mCherry	M	Veh	CS	Paired	11
58	mCherry	M	Veh	CS	Unpaired	3
58	mCherry	M	Veh	Pre	Paired	8
58	mCherry	M	Veh	Pre	Unpaired	2

## Sheet: Fig3_S3
Rat	Group	Drug	CSPeriod	CSType	NumberBouts
1	mCherry	CNO	Pre	Paired	15
1	mCherry	CNO	Pre	Unpaired	7
1	mCherry	CNO	Dur	Paired	17
1	mCherry	CNO	Dur	Unpaired	12
1	mCherry	Veh	Pre	Paired	23
1	mCherry	Veh	Pre	Unpaired	8
1	mCherry	Veh	Dur	Paired	36
1	mCherry	Veh	Dur	Unpaired	6
3	hM4Di	CNO	Pre	Paired	14
3	hM4Di	CNO	Pre	Unpaired	36
3	hM4Di	CNO	Dur	Paired	30
3	hM4Di	CNO	Dur	Unpaired	15
3	hM4Di	Veh	Pre	Paired	29
3	hM4Di	Veh	Pre	Unpaired	11
3	hM4Di	Veh	Dur	Paired	34
3	hM4Di	Veh	Dur	Unpaired	19
4	hM4Di	CNO	Pre	Paired	1
4	hM4Di	CNO	Pre	Unpaired	9
4	hM4Di	CNO	Dur	Paired	38
4	hM4Di	CNO	Dur	Unpaired	22
4	hM4Di	Veh	Pre	Paired	18
4	hM4Di	Veh	Pre	Unpaired	15
4	hM4Di	Veh	Dur	Paired	42
4	hM4Di	Veh	Dur	Unpaired	28
5	mCherry	CNO	Pre	Paired	15
5	mCherry	CNO	Pre	Unpaired	10
5	mCherry	CNO	Dur	Paired	28
5	mCherry	CNO	Dur	Unpaired	5
5	mCherry	Veh	Pre	Paired	16
5	mCherry	Veh	Pre	Unpaired	26
5	mCherry	Veh	Dur	Paired	44
5	mCherry	Veh	Dur	Unpaired	15
6	mCherry	CNO	Pre	Paired	37
6	mCherry	CNO	Pre	Unpaired	16
6	mCherry	CNO	Dur	Paired	43
6	mCherry	CNO	Dur	Unpaired	24
6	mCherry	Veh	Pre	Paired	12
6	mCherry	Veh	Pre	Unpaired	10
6	mCherry	Veh	Dur	Paired	54
6	mCherry	Veh	Dur	Unpaired	23
7	hM4Di	CNO	Pre	Paired	8
7	hM4Di	CNO	Pre	Unpaired	4
7	hM4Di	CNO	Dur	Paired	67
7	hM4Di	CNO	Dur	Unpaired	8
7	hM4Di	Veh	Pre	Paired	26
7	hM4Di	Veh	Pre	Unpaired	16
7	hM4Di	Veh	Dur	Paired	70
7	hM4Di	Veh	Dur	Unpaired	16
9	mCherry	CNO	Pre	Paired	10
9	mCherry	CNO	Pre	Unpaired	8
9	mCherry	CNO	Dur	Paired	21
9	mCherry	CNO	Dur	Unpaired	17
9	mCherry	Veh	Pre	Paired	3
9	mCherry	Veh	Pre	Unpaired	19
9	mCherry	Veh	Dur	Paired	57
9	mCherry	Veh	Dur	Unpaired	16
10	hM4Di	CNO	Pre	Paired	27
10	hM4Di	CNO	Pre	Unpaired	17
10	hM4Di	CNO	Dur	Paired	27
10	hM4Di	CNO	Dur	Unpaired	14
10	hM4Di	Veh	Pre	Paired	30
10	hM4Di	Veh	Pre	Unpaired	6
10	hM4Di	Veh	Dur	Paired	35
10	hM4Di	Veh	Dur	Unpaired	19
12	hM4Di	CNO	Pre	Paired	2
12	hM4Di	CNO	Pre	Unpaired	9
12	hM4Di	CNO	Dur	Paired	18
12	hM4Di	CNO	Dur	Unpaired	18
12	hM4Di	Veh	Pre	Paired	9
12	hM4Di	Veh	Pre	Unpaired	10
12	hM4Di	Veh	Dur	Paired	29
12	hM4Di	Veh	Dur	Unpaired	1
13	mCherry	CNO	Pre	Paired	9
13	mCherry	CNO	Pre	Unpaired	0
13	mCherry	CNO	Dur	Paired	22
13	mCherry	CNO	Dur	Unpaired	0
13	mCherry	Veh	Pre	Paired	7
13	mCherry	Veh	Pre	Unpaired	0
13	mCherry	Veh	Dur	Paired	5
13	mCherry	Veh	Dur	Unpaired	3
15	mCherry	CNO	Pre	Paired	9
15	mCherry	CNO	Pre	Unpaired	9
15	mCherry	CNO	Dur	Paired	24
15	mCherry	CNO	Dur	Unpaired	7
15	mCherry	Veh	Pre	Paired	37
15	mCherry	Veh	Pre	Unpaired	8
15	mCherry	Veh	Dur	Paired	33
15	mCherry	Veh	Dur	Unpaired	17
16	hM4Di	CNO	Pre	Paired	4
16	hM4Di	CNO	Pre	Unpaired	1
16	hM4Di	CNO	Dur	Paired	22
16	hM4Di	CNO	Dur	Unpaired	8
16	hM4Di	Veh	Pre	Paired	3
16	hM4Di	Veh	Pre	Unpaired	9
16	hM4Di	Veh	Dur	Paired	18
16	hM4Di	Veh	Dur	Unpaired	11
18	hM4Di	CNO	Pre	Paired	28
18	hM4Di	CNO	Pre	Unpaired	15
18	hM4Di	CNO	Dur	Paired	23
18	hM4Di	CNO	Dur	Unpaired	11
18	hM4Di	Veh	Pre	Paired	21
18	hM4Di	Veh	Pre	Unpaired	14
18	hM4Di	Veh	Dur	Paired	46
18	hM4Di	Veh	Dur	Unpaired	25
19	hM4Di	CNO	Pre	Paired	18
19	hM4Di	CNO	Pre	Unpaired	22
19	hM4Di	CNO	Dur	Paired	39
19	hM4Di	CNO	Dur	Unpaired	27
19	hM4Di	Veh	Pre	Paired	19
19	hM4Di	Veh	Pre	Unpaired	7
19	hM4Di	Veh	Dur	Paired	62
19	hM4Di	Veh	Dur	Unpaired	14
20	hM4Di	CNO	Pre	Paired	16
20	hM4Di	CNO	Pre	Unpaired	15
20	hM4Di	CNO	Dur	Paired	28
20	hM4Di	CNO	Dur	Unpaired	2
20	hM4Di	Veh	Pre	Paired	6
20	hM4Di	Veh	Pre	Unpaired	18
20	hM4Di	Veh	Dur	Paired	17
20	hM4Di	Veh	Dur	Unpaired	14
21	hM4Di	CNO	Pre	Paired	10
21	hM4Di	CNO	Pre	Unpaired	9
21	hM4Di	CNO	Dur	Paired	4
21	hM4Di	CNO	Dur	Unpaired	1
21	hM4Di	Veh	Pre	Paired	6
21	hM4Di	Veh	Pre	Unpaired	1
21	hM4Di	Veh	Dur	Paired	5
21	hM4Di	Veh	Dur	Unpaired	1
22	mCherry	CNO	Pre	Paired	4
22	mCherry	CNO	Pre	Unpaired	10
22	mCherry	CNO	Dur	Paired	7
22	mCherry	CNO	Dur	Unpaired	12
22	mCherry	Veh	Pre	Paired	11
22	mCherry	Veh	Pre	Unpaired	16
22	mCherry	Veh	Dur	Paired	21
22	mCherry	Veh	Dur	Unpaired	7
23	mCherry	CNO	Pre	Paired	15
23	mCherry	CNO	Pre	Unpaired	9
23	mCherry	CNO	Dur	Paired	32
23	mCherry	CNO	Dur	Unpaired	13
23	mCherry	Veh	Pre	Paired	12
23	mCherry	Veh	Pre	Unpaired	17
23	mCherry	Veh	Dur	Paired	34
23	mCherry	Veh	Dur	Unpaired	20
31	hM4Di	CNO	Pre	Paired	12
31	hM4Di	CNO	Pre	Unpaired	17
31	hM4Di	CNO	Dur	Paired	53
31	hM4Di	CNO	Dur	Unpaired	26
31	hM4Di	Veh	Pre	Paired	10
31	hM4Di	Veh	Pre	Unpaired	8
31	hM4Di	Veh	Dur	Paired	63
31	hM4Di	Veh	Dur	Unpaired	19
33	hM4Di	CNO	Pre	Paired	8
33	hM4Di	CNO	Pre	Unpaired	8
33	hM4Di	CNO	Dur	Paired	29
33	hM4Di	CNO	Dur	Unpaired	5
33	hM4Di	Veh	Pre	Paired	23
33	hM4Di	Veh	Pre	Unpaired	3
33	hM4Di	Veh	Dur	Paired	21
33	hM4Di	Veh	Dur	Unpaired	8
34	mCherry	CNO	Pre	Paired	5
34	mCherry	CNO	Pre	Unpaired	4
34	mCherry	CNO	Dur	Paired	8
34	mCherry	CNO	Dur	Unpaired	9
34	mCherry	Veh	Pre	Paired	2
34	mCherry	Veh	Pre	Unpaired	6
34	mCherry	Veh	Dur	Paired	13
34	mCherry	Veh	Dur	Unpaired	10
36	mCherry	CNO	Pre	Paired	48
36	mCherry	CNO	Pre	Unpaired	15
36	mCherry	CNO	Dur	Paired	47
36	mCherry	CNO	Dur	Unpaired	14
36	mCherry	Veh	Pre	Paired	22
36	mCherry	Veh	Pre	Unpaired	19
36	mCherry	Veh	Dur	Paired	33
36	mCherry	Veh	Dur	Unpaired	23
37	mCherry	CNO	Pre	Paired	0
37	mCherry	CNO	Pre	Unpaired	1
37	mCherry	CNO	Dur	Paired	9
37	mCherry	CNO	Dur	Unpaired	0
37	mCherry	Veh	Pre	Paired	0
37	mCherry	Veh	Pre	Unpaired	0
37	mCherry	Veh	Dur	Paired	13
37	mCherry	Veh	Dur	Unpaired	0
38	mCherry	CNO	Pre	Paired	9
38	mCherry	CNO	Pre	Unpaired	12
38	mCherry	CNO	Dur	Paired	10
38	mCherry	CNO	Dur	Unpaired	8
38	mCherry	Veh	Pre	Paired	4
38	mCherry	Veh	Pre	Unpaired	15
38	mCherry	Veh	Dur	Paired	11
38	mCherry	Veh	Dur	Unpaired	5
39	hM4Di	CNO	Pre	Paired	28
39	hM4Di	CNO	Pre	Unpaired	21
39	hM4Di	CNO	Dur	Paired	26
39	hM4Di	CNO	Dur	Unpaired	10
39	hM4Di	Veh	Pre	Paired	18
39	hM4Di	Veh	Pre	Unpaired	14
39	hM4Di	Veh	Dur	Paired	40
39	hM4Di	Veh	Dur	Unpaired	11
40	hM4Di	CNO	Pre	Paired	17
40	hM4Di	CNO	Pre	Unpaired	8
40	hM4Di	CNO	Dur	Paired	19
40	hM4Di	CNO	Dur	Unpaired	10
40	hM4Di	Veh	Pre	Paired	28
40	hM4Di	Veh	Pre	Unpaired	25
40	hM4Di	Veh	Dur	Paired	45
40	hM4Di	Veh	Dur	Unpaired	4
41	hM4Di	CNO	Pre	Paired	1
41	hM4Di	CNO	Pre	Unpaired	2
41	hM4Di	CNO	Dur	Paired	50
41	hM4Di	CNO	Dur	Unpaired	9
41	hM4Di	Veh	Pre	Paired	0
41	hM4Di	Veh	Pre	Unpaired	0
41	hM4Di	Veh	Dur	Paired	41
41	hM4Di	Veh	Dur	Unpaired	2
51	hM4Di	CNO	Pre	Paired	9
51	hM4Di	CNO	Pre	Unpaired	15
51	hM4Di	CNO	Dur	Paired	23
51	hM4Di	CNO	Dur	Unpaired	7
51	hM4Di	Veh	Pre	Paired	10
51	hM4Di	Veh	Pre	Unpaired	20
51	hM4Di	Veh	Dur	Paired	48
51	hM4Di	Veh	Dur	Unpaired	10
52	hM4Di	CNO	Pre	Paired	14
52	hM4Di	CNO	Pre	Unpaired	17
52	hM4Di	CNO	Dur	Paired	59
52	hM4Di	CNO	Dur	Unpaired	24
52	hM4Di	Veh	Pre	Paired	20
52	hM4Di	Veh	Pre	Unpaired	17
52	hM4Di	Veh	Dur	Paired	58
52	hM4Di	Veh	Dur	Unpaired	10
53	hM4Di	CNO	Pre	Paired	0
53	hM4Di	CNO	Pre	Unpaired	2
53	hM4Di	CNO	Dur	Paired	17
53	hM4Di	CNO	Dur	Unpaired	2
53	hM4Di	Veh	Pre	Paired	0
53	hM4Di	Veh	Pre	Unpaired	6
53	hM4Di	Veh	Dur	Paired	17
53	hM4Di	Veh	Dur	Unpaired	1
57	mCherry	CNO	Pre	Paired	2
57	mCherry	CNO	Pre	Unpaired	7
57	mCherry	CNO	Dur	Paired	23
57	mCherry	CNO	Dur	Unpaired	5
57	mCherry	Veh	Pre	Paired	6
57	mCherry	Veh	Pre	Unpaired	10
57	mCherry	Veh	Dur	Paired	23
57	mCherry	Veh	Dur	Unpaired	3
58	mCherry	CNO	Pre	Paired	9
58	mCherry	CNO	Pre	Unpaired	10
58	mCherry	CNO	Dur	Paired	28
58	mCherry	CNO	Dur	Unpaired	8
58	mCherry	Veh	Pre	Paired	11
58	mCherry	Veh	Pre	Unpaired	8
58	mCherry	Veh	Dur	Paired	65
58	mCherry	Veh	Dur	Unpaired	8

## Sheet: Fig3_S4
Rat	DrugSession	Drug	CSType	CSPeriod	BoutsOfNonContingentApproach	Site
1	1	CNO	Paired	Pre	11	NAc
1	1	CNO	Unpaired	Pre	16	NAc
1	1	CNO	Paired	CS	50	NAc
1	1	CNO	Unpaired	CS	27	NAc
1	1	Veh	Paired	Pre	12	NAc
1	1	Veh	Unpaired	Pre	11	NAc
1	1	Veh	Paired	CS	47	NAc
1	1	Veh	Unpaired	CS	14	NAc
1	2	CNO	Paired	Pre	4	NAc
1	2	CNO	Unpaired	Pre	6	NAc
1	2	CNO	Paired	CS	13	NAc
1	2	CNO	Unpaired	CS	9	NAc
1	2	Veh	Paired	Pre	6	NAc
1	2	Veh	Unpaired	Pre	9	NAc
1	2	Veh	Paired	CS	41	NAc
1	2	Veh	Unpaired	CS	13	NAc
2	1	CNO	Paired	Pre	0	NAc
2	1	CNO	Unpaired	Pre	0	NAc
2	1	CNO	Paired	CS	43	NAc
2	1	CNO	Unpaired	CS	12	NAc
2	1	Veh	Paired	Pre	3	NAc
2	1	Veh	Unpaired	Pre	0	NAc
2	1	Veh	Paired	CS	40	NAc
2	1	Veh	Unpaired	CS	2	NAc
2	2	CNO	Paired	Pre	6	NAc
2	2	CNO	Unpaired	Pre	0	NAc
2	2	CNO	Paired	CS	29	NAc
2	2	CNO	Unpaired	CS	7	NAc
2	2	Veh	Paired	Pre	4	NAc
2	2	Veh	Unpaired	Pre	11	NAc
2	2	Veh	Paired	CS	28	NAc
2	2	Veh	Unpaired	CS	4	NAc
4	1	CNO	Paired	Pre	0	NAc
4	1	CNO	Unpaired	Pre	0	NAc
4	1	CNO	Paired	CS	33	NAc
4	1	CNO	Unpaired	CS	0	NAc
4	1	Veh	Paired	Pre	0	NAc
4	1	Veh	Unpaired	Pre	0	NAc
4	1	Veh	Paired	CS	28	NAc
4	1	Veh	Unpaired	CS	1	NAc
4	2	CNO	Paired	Pre	0	NAc
4	2	CNO	Unpaired	Pre	0	NAc
4	2	CNO	Paired	CS	43	NAc
4	2	CNO	Unpaired	CS	0	NAc
4	2	Veh	Paired	Pre	15	NAc
4	2	Veh	Unpaired	Pre	3	NAc
4	2	Veh	Paired	CS	26	NAc
4	2	Veh	Unpaired	CS	21	NAc
5	1	CNO	Paired	Pre	10	NAc
5	1	CNO	Unpaired	Pre	9	NAc
5	1	CNO	Paired	CS	23	NAc
5	1	CNO	Unpaired	CS	5	NAc
5	1	Veh	Paired	Pre	3	NAc
5	1	Veh	Unpaired	Pre	7	NAc
5	1	Veh	Paired	CS	27	NAc
5	1	Veh	Unpaired	CS	2	NAc
5	2	CNO	Paired	Pre	4	NAc
5	2	CNO	Unpaired	Pre	2	NAc
5	2	CNO	Paired	CS	13	NAc
5	2	CNO	Unpaired	CS	2	NAc
5	2	Veh	Paired	Pre	5	NAc
5	2	Veh	Unpaired	Pre	2	NAc
5	2	Veh	Paired	CS	14	NAc
5	2	Veh	Unpaired	CS	5	NAc
8	1	CNO	Paired	Pre	0	NAc
8	1	CNO	Unpaired	Pre	4	NAc
8	1	CNO	Paired	CS	30	NAc
8	1	CNO	Unpaired	CS	4	NAc
8	1	Veh	Paired	Pre	12	NAc
8	1	Veh	Unpaired	Pre	7	NAc
8	1	Veh	Paired	CS	28	NAc
8	1	Veh	Unpaired	CS	13	NAc
8	2	CNO	Paired	Pre	0	NAc
8	2	CNO	Unpaired	Pre	0	NAc
8	2	CNO	Paired	CS	13	NAc
8	2	CNO	Unpaired	CS	2	NAc
8	2	Veh	Paired	Pre	4	NAc
8	2	Veh	Unpaired	Pre	0	NAc
8	2	Veh	Paired	CS	29	NAc
8	2	Veh	Unpaired	CS	10	NAc
9	1	CNO	Paired	Pre	9	NAc
9	1	CNO	Unpaired	Pre	12	NAc
9	1	CNO	Paired	CS	29	NAc
9	1	CNO	Unpaired	CS	18	NAc
9	1	Veh	Paired	Pre	2	NAc
9	1	Veh	Unpaired	Pre	5	NAc
9	1	Veh	Paired	CS	10	NAc
9	1	Veh	Unpaired	CS	7	NAc
9	2	CNO	Paired	Pre	2	NAc
9	2	CNO	Unpaired	Pre	6	NAc
9	2	CNO	Paired	CS	27	NAc
9	2	CNO	Unpaired	CS	10	NAc
9	2	Veh	Paired	Pre	5	NAc
9	2	Veh	Unpaired	Pre	2	NAc
9	2	Veh	Paired	CS	21	NAc
9	2	Veh	Unpaired	CS	4	NAc
10	1	CNO	Paired	Pre	4	NAc
10	1	CNO	Unpaired	Pre	1	NAc
10	1	CNO	Paired	CS	56	NAc
10	1	CNO	Unpaired	CS	10	NAc
10	1	Veh	Paired	Pre	5	NAc
10	1	Veh	Unpaired	Pre	4	NAc
10	1	Veh	Paired	CS	24	NAc
10	1	Veh	Unpaired	CS	2	NAc
10	2	CNO	Paired	Pre	2	NAc
10	2	CNO	Unpaired	Pre	1	NAc
10	2	CNO	Paired	CS	12	NAc
10	2	CNO	Unpaired	CS	1	NAc
10	2	Veh	Paired	Pre	5	NAc
10	2	Veh	Unpaired	Pre	5	NAc
10	2	Veh	Paired	CS	68	NAc
10	2	Veh	Unpaired	CS	14	NAc
11	1	CNO	Paired	Pre	10	mPFC
11	1	CNO	Unpaired	Pre	14	mPFC
11	1	CNO	Paired	CS	37	mPFC
11	1	CNO	Unpaired	CS	12	mPFC
11	1	Veh	Paired	Pre	9	mPFC
11	1	Veh	Unpaired	Pre	6	mPFC
11	1	Veh	Paired	CS	12	mPFC
11	1	Veh	Unpaired	CS	6	mPFC
11	2	CNO	Paired	Pre	3	mPFC
11	2	CNO	Unpaired	Pre	4	mPFC
11	2	CNO	Paired	CS	41	mPFC
11	2	CNO	Unpaired	CS	12	mPFC
11	2	Veh	Paired	Pre	13	mPFC
11	2	Veh	Unpaired	Pre	1	mPFC
11	2	Veh	Paired	CS	18	mPFC
11	2	Veh	Unpaired	CS	4	mPFC
12	1	CNO	Paired	Pre	4	mPFC
12	1	CNO	Unpaired	Pre	11	mPFC
12	1	CNO	Paired	CS	42	mPFC
12	1	CNO	Unpaired	CS	15	mPFC
12	1	Veh	Paired	Pre	0	mPFC
12	1	Veh	Unpaired	Pre	0	mPFC
12	1	Veh	Paired	CS	32	mPFC
12	1	Veh	Unpaired	CS	0	mPFC
12	2	CNO	Paired	Pre	2	mPFC
12	2	CNO	Unpaired	Pre	2	mPFC
12	2	CNO	Paired	CS	26	mPFC
12	2	CNO	Unpaired	CS	0	mPFC
12	2	Veh	Paired	Pre	1	mPFC
12	2	Veh	Unpaired	Pre	0	mPFC
12	2	Veh	Paired	CS	44	mPFC
12	2	Veh	Unpaired	CS	3	mPFC
13	1	CNO	Paired	Pre	0	mPFC
13	1	CNO	Unpaired	Pre	7	mPFC
13	1	CNO	Paired	CS	5	mPFC
13	1	CNO	Unpaired	CS	0	mPFC
13	1	Veh	Paired	Pre	8	mPFC
13	1	Veh	Unpaired	Pre	8	mPFC
13	1	Veh	Paired	CS	28	mPFC
13	1	Veh	Unpaired	CS	6	mPFC
13	2	CNO	Paired	Pre	1	mPFC
13	2	CNO	Unpaired	Pre	7	mPFC
13	2	CNO	Paired	CS	5	mPFC
13	2	CNO	Unpaired	CS	0	mPFC
13	2	Veh	Paired	Pre	6	mPFC
13	2	Veh	Unpaired	Pre	5	mPFC
13	2	Veh	Paired	CS	18	mPFC
13	2	Veh	Unpaired	CS	1	mPFC
14	1	CNO	Paired	Pre	6	mPFC
14	1	CNO	Unpaired	Pre	13	mPFC
14	1	CNO	Paired	CS	26	mPFC
14	1	CNO	Unpaired	CS	14	mPFC
14	1	Veh	Paired	Pre	14	mPFC
14	1	Veh	Unpaired	Pre	14	mPFC
14	1	Veh	Paired	CS	45	mPFC
14	1	Veh	Unpaired	CS	28	mPFC
14	2	CNO	Paired	Pre	3	mPFC
14	2	CNO	Unpaired	Pre	9	mPFC
14	2	CNO	Paired	CS	23	mPFC
14	2	CNO	Unpaired	CS	14	mPFC
14	2	Veh	Paired	Pre	9	mPFC
14	2	Veh	Unpaired	Pre	9	mPFC
14	2	Veh	Paired	CS	45	mPFC
14	2	Veh	Unpaired	CS	10	mPFC
15	1	CNO	Paired	Pre	1	mPFC
15	1	CNO	Unpaired	Pre	4	mPFC
15	1	CNO	Paired	CS	9	mPFC
15	1	CNO	Unpaired	CS	2	mPFC
15	1	Veh	Paired	Pre	9	mPFC
15	1	Veh	Unpaired	Pre	3	mPFC
15	1	Veh	Paired	CS	12	mPFC
15	1	Veh	Unpaired	CS	3	mPFC
15	2	CNO	Paired	Pre	23	mPFC
15	2	CNO	Unpaired	Pre	29	mPFC
15	2	CNO	Paired	CS	36	mPFC
15	2	CNO	Unpaired	CS	14	mPFC
15	2	Veh	Paired	Pre	3	mPFC
15	2	Veh	Unpaired	Pre	1	mPFC
15	2	Veh	Paired	CS	11	mPFC
15	2	Veh	Unpaired	CS	1	mPFC
16	1	CNO	Paired	Pre	2	mPFC
16	1	CNO	Unpaired	Pre	2	mPFC
16	1	CNO	Paired	CS	9	mPFC
16	1	CNO	Unpaired	CS	0	mPFC
16	1	Veh	Paired	Pre	13	mPFC
16	1	Veh	Unpaired	Pre	4	mPFC
16	1	Veh	Paired	CS	24	mPFC
16	1	Veh	Unpaired	CS	8	mPFC
16	2	CNO	Paired	Pre	4	mPFC
16	2	CNO	Unpaired	Pre	2	mPFC
16	2	CNO	Paired	CS	40	mPFC
16	2	CNO	Unpaired	CS	1	mPFC
16	2	Veh	Paired	Pre	1	mPFC
16	2	Veh	Unpaired	Pre	0	mPFC
16	2	Veh	Paired	CS	37	mPFC
16	2	Veh	Unpaired	CS	1	mPFC
18	1	CNO	Paired	Pre	4	mPFC
18	1	CNO	Unpaired	Pre	0	mPFC
18	1	CNO	Paired	CS	46	mPFC
18	1	CNO	Unpaired	CS	11	mPFC
18	1	Veh	Paired	Pre	0	mPFC
18	1	Veh	Unpaired	Pre	4	mPFC
18	1	Veh	Paired	CS	16	mPFC
18	1	Veh	Unpaired	CS	7	mPFC
18	2	CNO	Paired	Pre	4	mPFC
18	2	CNO	Unpaired	Pre	5	mPFC
18	2	CNO	Paired	CS	57	mPFC
18	2	CNO	Unpaired	CS	11	mPFC
18	2	Veh	Paired	Pre	2	mPFC
18	2	Veh	Unpaired	Pre	1	mPFC
18	2	Veh	Paired	CS	56	mPFC
18	2	Veh	Unpaired	CS	4	mPFC
19	1	CNO	Paired	Pre	0	mPFC
19	1	CNO	Unpaired	Pre	3	mPFC
19	1	CNO	Paired	CS	12	mPFC
19	1	CNO	Unpaired	CS	2	mPFC
19	1	Veh	Paired	Pre	3	mPFC
19	1	Veh	Unpaired	Pre	0	mPFC
19	1	Veh	Paired	CS	7	mPFC
19	1	Veh	Unpaired	CS	6	mPFC
19	2	CNO	Paired	Pre	3	mPFC
19	2	CNO	Unpaired	Pre	5	mPFC
19	2	CNO	Paired	CS	20	mPFC
19	2	CNO	Unpaired	CS	5	mPFC
19	2	Veh	Paired	Pre	4	mPFC
19	2	Veh	Unpaired	Pre	3	mPFC
19	2	Veh	Paired	CS	14	mPFC
19	2	Veh	Unpaired	CS	8	mPFC
20	1	CNO	Paired	Pre	0	mPFC
20	1	CNO	Unpaired	Pre	1	mPFC
20	1	CNO	Paired	CS	31	mPFC
20	1	CNO	Unpaired	CS	1	mPFC
20	1	Veh	Paired	Pre	0	mPFC
20	1	Veh	Unpaired	Pre	0	mPFC
20	1	Veh	Paired	CS	12	mPFC
20	1	Veh	Unpaired	CS	0	mPFC
20	2	CNO	Paired	Pre	0	mPFC
20	2	CNO	Unpaired	Pre	1	mPFC
20	2	CNO	Paired	CS	18	mPFC
20	2	CNO	Unpaired	CS	5	mPFC
20	2	Veh	Paired	Pre	9	mPFC
20	2	Veh	Unpaired	Pre	4	mPFC
20	2	Veh	Paired	CS	54	mPFC
20	2	Veh	Unpaired	CS	6	mPFC
