# Supplementary material for: Mesolimbic dopamine projections mediate cue-motivated reward seeking but not reward retrieval in rats
Source: eLife journal article supplement (doi:10.7554/elife.43551), 2019-05-20
Supplement: supp [file elife-43551-supp-v1.zip › elife_poa_e43551_Figure_4_source_data_1.xlsx]

## Sheet: Figure 4C and D
Rat	Drug	DrugSession	CSPeriod	CSType	LeverPresses	Site (or Group)
11	CNO	1	CS	Paired	19	mPFC
11	CNO	1	CS	Unpaired	18	mPFC
11	CNO	1	Pre	Paired	12	mPFC
11	CNO	1	Pre	Unpaired	6	mPFC
11	CNO	2	CS	Paired	27	mPFC
11	CNO	2	CS	Unpaired	4	mPFC
11	CNO	2	Pre	Paired	4	mPFC
11	CNO	2	Pre	Unpaired	11	mPFC
11	Veh	1	CS	Paired	11	mPFC
11	Veh	1	CS	Unpaired	6	mPFC
11	Veh	1	Pre	Paired	4	mPFC
11	Veh	1	Pre	Unpaired	7	mPFC
11	Veh	2	CS	Paired	14	mPFC
11	Veh	2	CS	Unpaired	3	mPFC
11	Veh	2	Pre	Paired	8	mPFC
11	Veh	2	Pre	Unpaired	0	mPFC
12	CNO	1	CS	Paired	44	mPFC
12	CNO	1	CS	Unpaired	18	mPFC
12	CNO	1	Pre	Paired	8	mPFC
12	CNO	1	Pre	Unpaired	8	mPFC
12	CNO	2	CS	Paired	29	mPFC
12	CNO	2	CS	Unpaired	2	mPFC
12	CNO	2	Pre	Paired	7	mPFC
12	CNO	2	Pre	Unpaired	7	mPFC
12	Veh	1	CS	Paired	32	mPFC
12	Veh	1	CS	Unpaired	4	mPFC
12	Veh	1	Pre	Paired	0	mPFC
12	Veh	1	Pre	Unpaired	1	mPFC
12	Veh	2	CS	Paired	36	mPFC
12	Veh	2	CS	Unpaired	11	mPFC
12	Veh	2	Pre	Paired	5	mPFC
12	Veh	2	Pre	Unpaired	4	mPFC
13	CNO	1	CS	Paired	3	mPFC
13	CNO	1	CS	Unpaired	2	mPFC
13	CNO	1	Pre	Paired	1	mPFC
13	CNO	1	Pre	Unpaired	2	mPFC
13	CNO	2	CS	Paired	8	mPFC
13	CNO	2	CS	Unpaired	10	mPFC
13	CNO	2	Pre	Paired	0	mPFC
13	CNO	2	Pre	Unpaired	3	mPFC
13	Veh	1	CS	Paired	29	mPFC
13	Veh	1	CS	Unpaired	14	mPFC
13	Veh	1	Pre	Paired	12	mPFC
13	Veh	1	Pre	Unpaired	4	mPFC
13	Veh	2	CS	Paired	35	mPFC
13	Veh	2	CS	Unpaired	6	mPFC
13	Veh	2	Pre	Paired	10	mPFC
13	Veh	2	Pre	Unpaired	8	mPFC
14	CNO	1	CS	Paired	24	mPFC
14	CNO	1	CS	Unpaired	11	mPFC
14	CNO	1	Pre	Paired	3	mPFC
14	CNO	1	Pre	Unpaired	2	mPFC
14	CNO	2	CS	Paired	18	mPFC
14	CNO	2	CS	Unpaired	9	mPFC
14	CNO	2	Pre	Paired	0	mPFC
14	CNO	2	Pre	Unpaired	8	mPFC
14	Veh	1	CS	Paired	35	mPFC
14	Veh	1	CS	Unpaired	31	mPFC
14	Veh	1	Pre	Paired	21	mPFC
14	Veh	1	Pre	Unpaired	26	mPFC
14	Veh	2	CS	Paired	32	mPFC
14	Veh	2	CS	Unpaired	22	mPFC
14	Veh	2	Pre	Paired	32	mPFC
14	Veh	2	Pre	Unpaired	21	mPFC
15	CNO	1	CS	Paired	6	mPFC
15	CNO	1	CS	Unpaired	0	mPFC
15	CNO	1	Pre	Paired	1	mPFC
15	CNO	1	Pre	Unpaired	0	mPFC
15	CNO	2	CS	Paired	7	mPFC
15	CNO	2	CS	Unpaired	1	mPFC
15	CNO	2	Pre	Paired	1	mPFC
15	CNO	2	Pre	Unpaired	2	mPFC
15	Veh	1	CS	Paired	12	mPFC
15	Veh	1	CS	Unpaired	2	mPFC
15	Veh	1	Pre	Paired	4	mPFC
15	Veh	1	Pre	Unpaired	3	mPFC
15	Veh	2	CS	Paired	6	mPFC
15	Veh	2	CS	Unpaired	2	mPFC
15	Veh	2	Pre	Paired	3	mPFC
15	Veh	2	Pre	Unpaired	0	mPFC
16	CNO	1	CS	Paired	7	mPFC
16	CNO	1	CS	Unpaired	1	mPFC
16	CNO	1	Pre	Paired	3	mPFC
16	CNO	1	Pre	Unpaired	7	mPFC
16	CNO	2	CS	Paired	68	mPFC
16	CNO	2	CS	Unpaired	11	mPFC
16	CNO	2	Pre	Paired	4	mPFC
16	CNO	2	Pre	Unpaired	14	mPFC
16	Veh	1	CS	Paired	24	mPFC
16	Veh	1	CS	Unpaired	9	mPFC
16	Veh	1	Pre	Paired	10	mPFC
16	Veh	1	Pre	Unpaired	4	mPFC
16	Veh	2	CS	Paired	22	mPFC
16	Veh	2	CS	Unpaired	0	mPFC
16	Veh	2	Pre	Paired	3	mPFC
16	Veh	2	Pre	Unpaired	0	mPFC
18	CNO	1	CS	Paired	15	mPFC
18	CNO	1	CS	Unpaired	7	mPFC
18	CNO	1	Pre	Paired	3	mPFC
18	CNO	1	Pre	Unpaired	1	mPFC
18	CNO	2	CS	Paired	16	mPFC
18	CNO	2	CS	Unpaired	7	mPFC
18	CNO	2	Pre	Paired	9	mPFC
18	CNO	2	Pre	Unpaired	8	mPFC
18	Veh	1	CS	Paired	21	mPFC
18	Veh	1	CS	Unpaired	2	mPFC
18	Veh	1	Pre	Paired	3	mPFC
18	Veh	1	Pre	Unpaired	0	mPFC
18	Veh	2	CS	Paired	21	mPFC
18	Veh	2	CS	Unpaired	13	mPFC
18	Veh	2	Pre	Paired	7	mPFC
18	Veh	2	Pre	Unpaired	5	mPFC
19	CNO	1	CS	Paired	7	mPFC
19	CNO	1	CS	Unpaired	0	mPFC
19	CNO	1	Pre	Paired	0	mPFC
19	CNO	1	Pre	Unpaired	0	mPFC
19	CNO	2	CS	Paired	10	mPFC
19	CNO	2	CS	Unpaired	7	mPFC
19	CNO	2	Pre	Paired	1	mPFC
19	CNO	2	Pre	Unpaired	6	mPFC
19	Veh	1	CS	Paired	0	mPFC
19	Veh	1	CS	Unpaired	2	mPFC
19	Veh	1	Pre	Paired	0	mPFC
19	Veh	1	Pre	Unpaired	2	mPFC
19	Veh	2	CS	Paired	9	mPFC
19	Veh	2	CS	Unpaired	2	mPFC
19	Veh	2	Pre	Paired	3	mPFC
19	Veh	2	Pre	Unpaired	3	mPFC
20	CNO	1	CS	Paired	6	mPFC
20	CNO	1	CS	Unpaired	6	mPFC
20	CNO	1	Pre	Paired	0	mPFC
20	CNO	1	Pre	Unpaired	1	mPFC
20	CNO	2	CS	Paired	12	mPFC
20	CNO	2	CS	Unpaired	1	mPFC
20	CNO	2	Pre	Paired	0	mPFC
20	CNO	2	Pre	Unpaired	0	mPFC
20	Veh	1	CS	Paired	27	mPFC
20	Veh	1	CS	Unpaired	0	mPFC
20	Veh	1	Pre	Paired	0	mPFC
20	Veh	1	Pre	Unpaired	0	mPFC
20	Veh	2	CS	Paired	15	mPFC
20	Veh	2	CS	Unpaired	0	mPFC
20	Veh	2	Pre	Paired	12	mPFC
20	Veh	2	Pre	Unpaired	7	mPFC
1	CNO	1	CS	Paired	18	NAc
1	CNO	1	CS	Unpaired	25	NAc
1	CNO	1	Pre	Paired	3	NAc
1	CNO	1	Pre	Unpaired	6	NAc
1	CNO	2	CS	Paired	5	NAc
1	CNO	2	CS	Unpaired	18	NAc
1	CNO	2	Pre	Paired	4	NAc
1	CNO	2	Pre	Unpaired	5	NAc
1	Veh	1	CS	Paired	23	NAc
1	Veh	1	CS	Unpaired	14	NAc
1	Veh	1	Pre	Paired	0	NAc
1	Veh	1	Pre	Unpaired	4	NAc
1	Veh	2	CS	Paired	26	NAc
1	Veh	2	CS	Unpaired	11	NAc
1	Veh	2	Pre	Paired	4	NAc
1	Veh	2	Pre	Unpaired	1	NAc
2	CNO	1	CS	Paired	17	NAc
2	CNO	1	CS	Unpaired	12	NAc
2	CNO	1	Pre	Paired	0	NAc
2	CNO	1	Pre	Unpaired	3	NAc
2	CNO	2	CS	Paired	0	NAc
2	CNO	2	CS	Unpaired	0	NAc
2	CNO	2	Pre	Paired	0	NAc
2	CNO	2	Pre	Unpaired	0	NAc
2	Veh	1	CS	Paired	17	NAc
2	Veh	1	CS	Unpaired	1	NAc
2	Veh	1	Pre	Paired	0	NAc
2	Veh	1	Pre	Unpaired	0	NAc
2	Veh	2	CS	Paired	21	NAc
2	Veh	2	CS	Unpaired	4	NAc
2	Veh	2	Pre	Paired	3	NAc
2	Veh	2	Pre	Unpaired	2	NAc
4	CNO	1	CS	Paired	11	NAc
4	CNO	1	CS	Unpaired	0	NAc
4	CNO	1	Pre	Paired	0	NAc
4	CNO	1	Pre	Unpaired	0	NAc
4	CNO	2	CS	Paired	3	NAc
4	CNO	2	CS	Unpaired	2	NAc
4	CNO	2	Pre	Paired	3	NAc
4	CNO	2	Pre	Unpaired	2	NAc
4	Veh	1	CS	Paired	25	NAc
4	Veh	1	CS	Unpaired	6	NAc
4	Veh	1	Pre	Paired	6	NAc
4	Veh	1	Pre	Unpaired	1	NAc
4	Veh	2	CS	Paired	16	NAc
4	Veh	2	CS	Unpaired	13	NAc
4	Veh	2	Pre	Paired	2	NAc
4	Veh	2	Pre	Unpaired	7	NAc
5	CNO	1	CS	Paired	18	NAc
5	CNO	1	CS	Unpaired	8	NAc
5	CNO	1	Pre	Paired	8	NAc
5	CNO	1	Pre	Unpaired	8	NAc
5	CNO	2	CS	Paired	1	NAc
5	CNO	2	CS	Unpaired	1	NAc
5	CNO	2	Pre	Paired	1	NAc
5	CNO	2	Pre	Unpaired	1	NAc
5	Veh	1	CS	Paired	9	NAc
5	Veh	1	CS	Unpaired	9	NAc
5	Veh	1	Pre	Paired	5	NAc
5	Veh	1	Pre	Unpaired	18	NAc
5	Veh	2	CS	Paired	6	NAc
5	Veh	2	CS	Unpaired	3	NAc
5	Veh	2	Pre	Paired	0	NAc
5	Veh	2	Pre	Unpaired	4	NAc
8	CNO	1	CS	Paired	35	NAc
8	CNO	1	CS	Unpaired	12	NAc
8	CNO	1	Pre	Paired	17	NAc
8	CNO	1	Pre	Unpaired	24	NAc
8	CNO	2	CS	Paired	3	NAc
8	CNO	2	CS	Unpaired	1	NAc
8	CNO	2	Pre	Paired	1	NAc
8	CNO	2	Pre	Unpaired	0	NAc
8	Veh	1	CS	Paired	35	NAc
8	Veh	1	CS	Unpaired	22	NAc
8	Veh	1	Pre	Paired	14	NAc
8	Veh	1	Pre	Unpaired	13	NAc
8	Veh	2	CS	Paired	8	NAc
8	Veh	2	CS	Unpaired	7	NAc
8	Veh	2	Pre	Paired	4	NAc
8	Veh	2	Pre	Unpaired	2	NAc
9	CNO	1	CS	Paired	17	NAc
9	CNO	1	CS	Unpaired	22	NAc
9	CNO	1	Pre	Paired	9	NAc
9	CNO	1	Pre	Unpaired	8	NAc
9	CNO	2	CS	Paired	13	NAc
9	CNO	2	CS	Unpaired	10	NAc
9	CNO	2	Pre	Paired	2	NAc
9	CNO	2	Pre	Unpaired	7	NAc
9	Veh	1	CS	Paired	29	NAc
9	Veh	1	CS	Unpaired	4	NAc
9	Veh	1	Pre	Paired	0	NAc
9	Veh	1	Pre	Unpaired	4	NAc
9	Veh	2	CS	Paired	15	NAc
9	Veh	2	CS	Unpaired	2	NAc
9	Veh	2	Pre	Paired	0	NAc
9	Veh	2	Pre	Unpaired	3	NAc
10	CNO	1	CS	Paired	21	NAc
10	CNO	1	CS	Unpaired	6	NAc
10	CNO	1	Pre	Paired	4	NAc
10	CNO	1	Pre	Unpaired	12	NAc
10	CNO	2	CS	Paired	9	NAc
10	CNO	2	CS	Unpaired	6	NAc
10	CNO	2	Pre	Paired	4	NAc
10	CNO	2	Pre	Unpaired	0	NAc
10	Veh	1	CS	Paired	23	NAc
10	Veh	1	CS	Unpaired	5	NAc
10	Veh	1	Pre	Paired	3	NAc
10	Veh	1	Pre	Unpaired	0	NAc
10	Veh	2	CS	Paired	15	NAc
10	Veh	2	CS	Unpaired	9	NAc
10	Veh	2	Pre	Paired	10	NAc
10	Veh	2	Pre	Unpaired	4	NAc

## Sheet: Figure 4E
Rat	Drug	Site	PropPressesFollowedByApproach	CSPeriod	SqrtPropPressesFollowedByApproach
1	CNO	NAc	0.611111	CSPlus	0.781736
1	Veh	NAc	0.608696	CSPlus	0.780189
1	Veh	NAc	0.576923	CSPlus	0.759555
1	CNO	NAc	0.8	CSPlus	0.894427
2	CNO	NAc	0.647059	CSPlus	0.8044
2	Veh	NAc	0.529412	CSPlus	0.727607
2	Veh	NAc	0.285714	CSPlus	0.534522
2	CNO	NAc		CSPlus
4	Veh	NAc	0.08	CSPlus	0.282843
4	CNO	NAc	0.727273	CSPlus	0.852803
4	CNO	NAc	0.666667	CSPlus	0.816497
4	Veh	NAc	0.375	CSPlus	0.612372
5	CNO	NAc	0.277778	CSPlus	0.527046
5	Veh	NAc	0.333333	CSPlus	0.57735
5	Veh	NAc	0	CSPlus	0
5	CNO	NAc	0	CSPlus	0
8	Veh	NAc	0.314286	CSPlus	0.560612
8	CNO	NAc	0.428571	CSPlus	0.654654
8	CNO	NAc	0.666667	CSPlus	0.816497
8	Veh	NAc	0.625	CSPlus	0.790569
9	CNO	NAc	0.0588235	CSPlus	0.242536
9	Veh	NAc	0.137931	CSPlus	0.371391
9	Veh	NAc	0.2	CSPlus	0.447214
9	CNO	NAc	0.230769	CSPlus	0.480384
10	Veh	NAc	0.478261	CSPlus	0.691564
10	CNO	NAc	0.619048	CSPlus	0.786796
10	CNO	NAc	0.444444	CSPlus	0.666667
10	Veh	NAc	0.733333	CSPlus	0.856349
11	CNO	mPFC	0.684211	CSPlus	0.82717
11	Veh	mPFC	0.181818	CSPlus	0.426401
11	Veh	mPFC	0.5	CSPlus	0.707107
11	CNO	mPFC	0.444444	CSPlus	0.666667
12	CNO	mPFC	0.386364	CSPlus	0.621582
12	Veh	mPFC	0.3125	CSPlus	0.559017
12	Veh	mPFC	0.583333	CSPlus	0.763763
12	CNO	mPFC	0.37931	CSPlus	0.615882
13	Veh	mPFC	0.62069	CSPlus	0.787839
13	CNO	mPFC	0.333333	CSPlus	0.57735
13	CNO	mPFC	0	CSPlus	0
13	Veh	mPFC	0.457143	CSPlus	0.676123
14	Veh	mPFC	0.714286	CSPlus	0.845154
14	CNO	mPFC	0.5	CSPlus	0.707107
14	CNO	mPFC	0.611111	CSPlus	0.781736
14	Veh	mPFC	0.46875	CSPlus	0.684653
15	CNO	mPFC	0.5	CSPlus	0.707107
15	Veh	mPFC	0.416667	CSPlus	0.645497
15	Veh	mPFC	0.333333	CSPlus	0.57735
15	CNO	mPFC	0.714286	CSPlus	0.845154
16	CNO	mPFC	0.142857	CSPlus	0.377964
16	Veh	mPFC	0.125	CSPlus	0.353553
16	Veh	mPFC	0.136364	CSPlus	0.369274
16	CNO	mPFC	0.264706	CSPlus	0.514496
18	Veh	mPFC	0.285714	CSPlus	0.534522
18	CNO	mPFC	0.333333	CSPlus	0.57735
18	CNO	mPFC	0.625	CSPlus	0.790569
18	Veh	mPFC	0.52381	CSPlus	0.723747
19	CNO	mPFC	0.142857	CSPlus	0.377964
19	Veh	mPFC		CSPlus
19	Veh	mPFC	0.666667	CSPlus	0.816497
19	CNO	mPFC	0.1	CSPlus	0.316228
20	Veh	mPFC	0.185185	CSPlus	0.430331
20	CNO	mPFC	0	CSPlus	0
20	CNO	mPFC	0.0833333	CSPlus	0.288675
20	Veh	mPFC	0.6	CSPlus	0.774597
1	CNO	NAc	0.2	CSMinus	0.447214
1	Veh	NAc	0.571429	CSMinus	0.755929
1	Veh	NAc	0.363636	CSMinus	0.603023
1	CNO	NAc	0.277778	CSMinus	0.527046
2	CNO	NAc	0.166667	CSMinus	0.408248
2	Veh	NAc	0	CSMinus	0
2	Veh	NAc	0	CSMinus	0
2	CNO	NAc		CSMinus
4	Veh	NAc	0.166667	CSMinus	0.408248
4	CNO	NAc		CSMinus
4	CNO	NAc	0	CSMinus	0
4	Veh	NAc	0.384615	CSMinus	0.620174
5	CNO	NAc	0	CSMinus	0
5	Veh	NAc	0	CSMinus	0
5	Veh	NAc	0.333333	CSMinus	0.57735
5	CNO	NAc	0	CSMinus	0
8	Veh	NAc	0.0454545	CSMinus	0.213201
8	CNO	NAc	0.25	CSMinus	0.5
8	CNO	NAc	0	CSMinus	0
8	Veh	NAc	0	CSMinus	0
9	CNO	NAc	0	CSMinus	0
9	Veh	NAc	0	CSMinus	0
9	Veh	NAc	0.5	CSMinus	0.707107
9	CNO	NAc	0	CSMinus	0
10	Veh	NAc	0	CSMinus	0
10	CNO	NAc	0.166667	CSMinus	0.408248
10	CNO	NAc	0	CSMinus	0
10	Veh	NAc	0.222222	CSMinus	0.471405
11	CNO	mPFC	0.277778	CSMinus	0.527046
11	Veh	mPFC	0.333333	CSMinus	0.57735
11	Veh	mPFC	0	CSMinus	0
11	CNO	mPFC	0.5	CSMinus	0.707107
12	CNO	mPFC	0.222222	CSMinus	0.471405
12	Veh	mPFC	0.25	CSMinus	0.5
12	Veh	mPFC	0.272727	CSMinus	0.522233
12	CNO	mPFC	0.5	CSMinus	0.707107
13	Veh	mPFC	0.142857	CSMinus	0.377964
13	CNO	mPFC	0	CSMinus	0
13	CNO	mPFC	0	CSMinus	0
13	Veh	mPFC	0	CSMinus	0
14	Veh	mPFC	0.451613	CSMinus	0.672022
14	CNO	mPFC	0.181818	CSMinus	0.426401
14	CNO	mPFC	0.111111	CSMinus	0.333333
14	Veh	mPFC	0.227273	CSMinus	0.476731
15	CNO	mPFC		CSMinus
15	Veh	mPFC	0	CSMinus	0
15	Veh	mPFC	0	CSMinus	0
15	CNO	mPFC	0	CSMinus	0
16	CNO	mPFC	0	CSMinus	0
16	Veh	mPFC	0	CSMinus	0
16	Veh	mPFC		CSMinus
16	CNO	mPFC	0.0909091	CSMinus	0.301511
18	Veh	mPFC	0.5	CSMinus	0.707107
18	CNO	mPFC	0.142857	CSMinus	0.377964
18	CNO	mPFC	0.285714	CSMinus	0.534522
18	Veh	mPFC	0.230769	CSMinus	0.480384
19	CNO	mPFC		CSMinus
19	Veh	mPFC	0	CSMinus	0
19	Veh	mPFC	1	CSMinus	1
19	CNO	mPFC	0.428571	CSMinus	0.654654
20	Veh	mPFC		CSMinus
20	CNO	mPFC	0	CSMinus	0
20	CNO	mPFC	0	CSMinus	0
20	Veh	mPFC		CSMinus
1	CNO	NAc	0.388889	Pre	0.62361
1	Veh	NAc	0.444444	Pre	0.666667
2	CNO	NAc	0	Pre	0
2	Veh	NAc	0.4	Pre	0.632456
4	CNO	NAc	0	Pre	0
4	Veh	NAc	0.0625	Pre	0.25
5	CNO	NAc	0.166667	Pre	0.408248
5	Veh	NAc	0.0740741	Pre	0.272166
8	CNO	NAc	0.142857	Pre	0.377964
8	Veh	NAc	0.0909091	Pre	0.301511
9	CNO	NAc	0.153846	Pre	0.392232
9	Veh	NAc	0.285714	Pre	0.534522
10	CNO	NAc	0.05	Pre	0.223607
10	Veh	NAc	0.176471	Pre	0.420084
11	CNO	mPFC	0.181818	Pre	0.426401
11	Veh	mPFC	0.210526	Pre	0.458831
12	CNO	mPFC	0.133333	Pre	0.365148
12	Veh	mPFC	0.3	Pre	0.547723
13	CNO	mPFC	0.166667	Pre	0.408248
13	Veh	mPFC	0.176471	Pre	0.420084
14	CNO	mPFC	0.307692	Pre	0.5547
14	Veh	mPFC	0.25	Pre	0.5
15	CNO	mPFC	0.5	Pre	0.707107
15	Veh	mPFC	0.4	Pre	0.632456
16	CNO	mPFC	0.0714286	Pre	0.267261
16	Veh	mPFC	0.0588235	Pre	0.242536
18	CNO	mPFC	0.142857	Pre	0.377964
18	Veh	mPFC	0.133333	Pre	0.365148
19	CNO	mPFC	0	Pre	0
19	Veh	mPFC	0.375	Pre	0.612372
20	CNO	mPFC	0	Pre	0
20	Veh	mPFC	0.105263	Pre	0.324443

## Sheet: Figure 4F
Rat	Site	DeltaPressesWithoutApproach_Veh	CNOSuppression
1	NAc	9	-14.5
2	NAc	10.5	-9
4	NAc	13	-11
5	NAc	3.5	0
8	NAc	5.5	-2.5
9	NAc	18.5	-12.5
10	NAc	2	-1.5
11	mPFC	3.5	8.5
12	mPFC	16	-2.5
13	mPFC	5.5	-16
14	mPFC	-7	12.5
15	mPFC	3	0
16	mPFC	14	17.5
18	mPFC	8	-6.5
19	mPFC	0.5	5
20	mPFC	8.5	-6

## Sheet: Fig4_S2
Rat	Group	Drug	DrugSession	CSPeriod	CSType	LeverPresses
42	NAc	CNO	1	CS	Paired	10
42	NAc	CNO	1	CS	Unpaired	11
42	NAc	CNO	1	Pre	Paired	2
42	NAc	CNO	1	Pre	Unpaired	2
42	NAc	CNO	2	CS	Paired	13
42	NAc	CNO	2	CS	Unpaired	2
42	NAc	CNO	2	Pre	Paired	6
42	NAc	CNO	2	Pre	Unpaired	1
42	NAc	Veh	1	CS	Paired	10
42	NAc	Veh	1	CS	Unpaired	2
42	NAc	Veh	1	Pre	Paired	0
42	NAc	Veh	1	Pre	Unpaired	3
42	NAc	Veh	2	CS	Paired	4
42	NAc	Veh	2	CS	Unpaired	3
42	NAc	Veh	2	Pre	Paired	0
42	NAc	Veh	2	Pre	Unpaired	0
43	NAc	CNO	1	CS	Paired	0
43	NAc	CNO	1	CS	Unpaired	0
43	NAc	CNO	1	Pre	Paired	0
43	NAc	CNO	1	Pre	Unpaired	0
43	NAc	CNO	2	CS	Paired	5
43	NAc	CNO	2	CS	Unpaired	1
43	NAc	CNO	2	Pre	Paired	2
43	NAc	CNO	2	Pre	Unpaired	5
43	NAc	Veh	1	CS	Paired	4
43	NAc	Veh	1	CS	Unpaired	0
43	NAc	Veh	1	Pre	Paired	0
43	NAc	Veh	1	Pre	Unpaired	0
43	NAc	Veh	2	CS	Paired	9
43	NAc	Veh	2	CS	Unpaired	3
43	NAc	Veh	2	Pre	Paired	0
43	NAc	Veh	2	Pre	Unpaired	0
44	NAc	CNO	1	CS	Paired	2
44	NAc	CNO	1	CS	Unpaired	0
44	NAc	CNO	1	Pre	Paired	0
44	NAc	CNO	1	Pre	Unpaired	2
44	NAc	CNO	2	CS	Paired	7
44	NAc	CNO	2	CS	Unpaired	1
44	NAc	CNO	2	Pre	Paired	0
44	NAc	CNO	2	Pre	Unpaired	0
44	NAc	Veh	1	CS	Paired	8
44	NAc	Veh	1	CS	Unpaired	1
44	NAc	Veh	1	Pre	Paired	1
44	NAc	Veh	1	Pre	Unpaired	0
44	NAc	Veh	2	CS	Paired	3
44	NAc	Veh	2	CS	Unpaired	0
44	NAc	Veh	2	Pre	Paired	0
44	NAc	Veh	2	Pre	Unpaired	0
45	NAc	CNO	1	CS	Paired	5
45	NAc	CNO	1	CS	Unpaired	6
45	NAc	CNO	1	Pre	Paired	2
45	NAc	CNO	1	Pre	Unpaired	0
45	NAc	CNO	2	CS	Paired	7
45	NAc	CNO	2	CS	Unpaired	2
45	NAc	CNO	2	Pre	Paired	3
45	NAc	CNO	2	Pre	Unpaired	0
45	NAc	Veh	1	CS	Paired	8
45	NAc	Veh	1	CS	Unpaired	9
45	NAc	Veh	1	Pre	Paired	2
45	NAc	Veh	1	Pre	Unpaired	0
45	NAc	Veh	2	CS	Paired	21
45	NAc	Veh	2	CS	Unpaired	18
45	NAc	Veh	2	Pre	Paired	6
45	NAc	Veh	2	Pre	Unpaired	8
46	NAc	CNO	1	CS	Paired	9
46	NAc	CNO	1	CS	Unpaired	1
46	NAc	CNO	1	Pre	Paired	1
46	NAc	CNO	1	Pre	Unpaired	5
46	NAc	CNO	2	CS	Paired	14
46	NAc	CNO	2	CS	Unpaired	19
46	NAc	CNO	2	Pre	Paired	11
46	NAc	CNO	2	Pre	Unpaired	12
46	NAc	Veh	1	CS	Paired	5
46	NAc	Veh	1	CS	Unpaired	0
46	NAc	Veh	1	Pre	Paired	0
46	NAc	Veh	1	Pre	Unpaired	0
46	NAc	Veh	2	CS	Paired	6
46	NAc	Veh	2	CS	Unpaired	5
46	NAc	Veh	2	Pre	Paired	4
46	NAc	Veh	2	Pre	Unpaired	2
47	NAc	CNO	1	CS	Paired	23
47	NAc	CNO	1	CS	Unpaired	3
47	NAc	CNO	1	Pre	Paired	1
47	NAc	CNO	1	Pre	Unpaired	3
47	NAc	CNO	2	CS	Paired	21
47	NAc	CNO	2	CS	Unpaired	27
47	NAc	CNO	2	Pre	Paired	8
47	NAc	CNO	2	Pre	Unpaired	13
47	NAc	Veh	1	CS	Paired	18
47	NAc	Veh	1	CS	Unpaired	7
47	NAc	Veh	1	Pre	Paired	15
47	NAc	Veh	1	Pre	Unpaired	2
47	NAc	Veh	2	CS	Paired	25
47	NAc	Veh	2	CS	Unpaired	7
47	NAc	Veh	2	Pre	Paired	22
47	NAc	Veh	2	Pre	Unpaired	10
48	mPFC	CNO	1	CS	Paired	0
48	mPFC	CNO	1	CS	Unpaired	1
48	mPFC	CNO	1	Pre	Paired	1
48	mPFC	CNO	1	Pre	Unpaired	4
48	mPFC	CNO	2	CS	Paired	11
48	mPFC	CNO	2	CS	Unpaired	3
48	mPFC	CNO	2	Pre	Paired	0
48	mPFC	CNO	2	Pre	Unpaired	3
48	mPFC	Veh	1	CS	Paired	6
48	mPFC	Veh	1	CS	Unpaired	3
48	mPFC	Veh	1	Pre	Paired	0
48	mPFC	Veh	1	Pre	Unpaired	2
48	mPFC	Veh	2	CS	Paired	1
48	mPFC	Veh	2	CS	Unpaired	1
48	mPFC	Veh	2	Pre	Paired	0
48	mPFC	Veh	2	Pre	Unpaired	0
49	mPFC	CNO	1	CS	Paired	32
49	mPFC	CNO	1	CS	Unpaired	14
49	mPFC	CNO	1	Pre	Paired	27
49	mPFC	CNO	1	Pre	Unpaired	10
49	mPFC	CNO	2	CS	Paired	18
49	mPFC	CNO	2	CS	Unpaired	9
49	mPFC	CNO	2	Pre	Paired	11
49	mPFC	CNO	2	Pre	Unpaired	3
49	mPFC	Veh	1	CS	Paired	11
49	mPFC	Veh	1	CS	Unpaired	9
49	mPFC	Veh	1	Pre	Paired	2
49	mPFC	Veh	1	Pre	Unpaired	1
49	mPFC	Veh	2	CS	Paired	14
49	mPFC	Veh	2	CS	Unpaired	3
49	mPFC	Veh	2	Pre	Paired	3
49	mPFC	Veh	2	Pre	Unpaired	8
50	mPFC	CNO	1	CS	Paired	5
50	mPFC	CNO	1	CS	Unpaired	0
50	mPFC	CNO	1	Pre	Paired	0
50	mPFC	CNO	1	Pre	Unpaired	1
50	mPFC	CNO	2	CS	Paired	4
50	mPFC	CNO	2	CS	Unpaired	0
50	mPFC	CNO	2	Pre	Paired	0
50	mPFC	CNO	2	Pre	Unpaired	1
50	mPFC	Veh	1	CS	Paired	5
50	mPFC	Veh	1	CS	Unpaired	1
50	mPFC	Veh	1	Pre	Paired	0
50	mPFC	Veh	1	Pre	Unpaired	2
50	mPFC	Veh	2	CS	Paired	7
50	mPFC	Veh	2	CS	Unpaired	5
50	mPFC	Veh	2	Pre	Paired	2
50	mPFC	Veh	2	Pre	Unpaired	2
51	mPFC	CNO	1	CS	Paired	19
51	mPFC	CNO	1	CS	Unpaired	1
51	mPFC	CNO	1	Pre	Paired	0
51	mPFC	CNO	1	Pre	Unpaired	3
51	mPFC	CNO	2	CS	Paired	48
51	mPFC	CNO	2	CS	Unpaired	2
51	mPFC	CNO	2	Pre	Paired	6
51	mPFC	CNO	2	Pre	Unpaired	2
51	mPFC	Veh	1	CS	Paired	26
51	mPFC	Veh	1	CS	Unpaired	5
51	mPFC	Veh	1	Pre	Paired	1
51	mPFC	Veh	1	Pre	Unpaired	0
51	mPFC	Veh	2	CS	Paired	70
51	mPFC	Veh	2	CS	Unpaired	5
51	mPFC	Veh	2	Pre	Paired	0
51	mPFC	Veh	2	Pre	Unpaired	0
52	mPFC	CNO	1	CS	Paired	17
52	mPFC	CNO	1	CS	Unpaired	34
52	mPFC	CNO	1	Pre	Paired	3
52	mPFC	CNO	1	Pre	Unpaired	23
52	mPFC	CNO	2	CS	Paired	7
52	mPFC	CNO	2	CS	Unpaired	16
52	mPFC	CNO	2	Pre	Paired	3
52	mPFC	CNO	2	Pre	Unpaired	2
52	mPFC	Veh	1	CS	Paired	13
52	mPFC	Veh	1	CS	Unpaired	24
52	mPFC	Veh	1	Pre	Paired	6
52	mPFC	Veh	1	Pre	Unpaired	7
52	mPFC	Veh	2	CS	Paired	13
52	mPFC	Veh	2	CS	Unpaired	16
52	mPFC	Veh	2	Pre	Paired	4
52	mPFC	Veh	2	Pre	Unpaired	8
53	mPFC	CNO	1	CS	Paired	20
53	mPFC	CNO	1	CS	Unpaired	3
53	mPFC	CNO	1	Pre	Paired	2
53	mPFC	CNO	1	Pre	Unpaired	3
53	mPFC	CNO	2	CS	Paired	6
53	mPFC	CNO	2	CS	Unpaired	3
53	mPFC	CNO	2	Pre	Paired	1
53	mPFC	CNO	2	Pre	Unpaired	0
53	mPFC	Veh	1	CS	Paired	11
53	mPFC	Veh	1	CS	Unpaired	0
53	mPFC	Veh	1	Pre	Paired	3
53	mPFC	Veh	1	Pre	Unpaired	0
53	mPFC	Veh	2	CS	Paired	39
53	mPFC	Veh	2	CS	Unpaired	2
53	mPFC	Veh	2	Pre	Paired	3
53	mPFC	Veh	2	Pre	Unpaired	3

## Sheet: Fig4_S3
Rat	Drug	DrugSession	CSPeriod	CSType	LeverPressesFollowedbyApproach	Site
1	CNO	1	Pre	Paired	2	NAc
1	CNO	1	CS	Paired	11	NAc
1	CNO	1	Pre	Unpaired	3	NAc
1	CNO	1	CS	Unpaired	5	NAc
1	Veh	1	Pre	Paired	0	NAc
1	Veh	1	CS	Paired	14	NAc
1	Veh	1	Pre	Unpaired	2	NAc
1	Veh	1	CS	Unpaired	8	NAc
1	Veh	2	Pre	Paired	2	NAc
1	Veh	2	CS	Paired	15	NAc
1	Veh	2	Pre	Unpaired	0	NAc
1	Veh	2	CS	Unpaired	4	NAc
1	CNO	2	Pre	Paired	0	NAc
1	CNO	2	CS	Paired	4	NAc
1	CNO	2	Pre	Unpaired	2	NAc
1	CNO	2	CS	Unpaired	5	NAc
2	CNO	1	Pre	Paired	0	NAc
2	CNO	1	CS	Paired	11	NAc
2	CNO	1	Pre	Unpaired	0	NAc
2	CNO	1	CS	Unpaired	2	NAc
2	Veh	1	Pre	Paired	0	NAc
2	Veh	1	CS	Paired	9	NAc
2	Veh	1	Pre	Unpaired	0	NAc
2	Veh	1	CS	Unpaired	0	NAc
2	Veh	2	Pre	Paired	1	NAc
2	Veh	2	CS	Paired	6	NAc
2	Veh	2	Pre	Unpaired	1	NAc
2	Veh	2	CS	Unpaired	0	NAc
2	CNO	2	Pre	Paired	0	NAc
2	CNO	2	CS	Paired	0	NAc
2	CNO	2	Pre	Unpaired	0	NAc
2	CNO	2	CS	Unpaired	0	NAc
4	Veh	1	Pre	Paired	0	NAc
4	Veh	1	CS	Paired	2	NAc
4	Veh	1	Pre	Unpaired	0	NAc
4	Veh	1	CS	Unpaired	1	NAc
4	CNO	1	Pre	Paired	0	NAc
4	CNO	1	CS	Paired	8	NAc
4	CNO	1	Pre	Unpaired	0	NAc
4	CNO	1	CS	Unpaired	0	NAc
4	CNO	2	Pre	Paired	0	NAc
4	CNO	2	CS	Paired	2	NAc
4	CNO	2	Pre	Unpaired	0	NAc
4	CNO	2	CS	Unpaired	0	NAc
4	Veh	2	Pre	Paired	1	NAc
4	Veh	2	CS	Paired	6	NAc
4	Veh	2	Pre	Unpaired	0	NAc
4	Veh	2	CS	Unpaired	5	NAc
5	CNO	1	Pre	Paired	0	NAc
5	CNO	1	CS	Paired	5	NAc
5	CNO	1	Pre	Unpaired	1	NAc
5	CNO	1	CS	Unpaired	0	NAc
5	Veh	1	Pre	Paired	0	NAc
5	Veh	1	CS	Paired	3	NAc
5	Veh	1	Pre	Unpaired	2	NAc
5	Veh	1	CS	Unpaired	0	NAc
5	Veh	2	Pre	Paired	0	NAc
5	Veh	2	CS	Paired	0	NAc
5	Veh	2	Pre	Unpaired	0	NAc
5	Veh	2	CS	Unpaired	1	NAc
5	CNO	2	Pre	Paired	1	NAc
5	CNO	2	CS	Paired	0	NAc
5	CNO	2	Pre	Unpaired	1	NAc
5	CNO	2	CS	Unpaired	0	NAc
8	Veh	1	Pre	Paired	2	NAc
8	Veh	1	CS	Paired	11	NAc
8	Veh	1	Pre	Unpaired	1	NAc
8	Veh	1	CS	Unpaired	1	NAc
8	CNO	1	Pre	Paired	4	NAc
8	CNO	1	CS	Paired	15	NAc
8	CNO	1	Pre	Unpaired	2	NAc
8	CNO	1	CS	Unpaired	3	NAc
8	CNO	2	Pre	Paired	0	NAc
8	CNO	2	CS	Paired	2	NAc
8	CNO	2	Pre	Unpaired	0	NAc
8	CNO	2	CS	Unpaired	0	NAc
8	Veh	2	Pre	Paired	0	NAc
8	Veh	2	CS	Paired	5	NAc
8	Veh	2	Pre	Unpaired	0	NAc
8	Veh	2	CS	Unpaired	0	NAc
9	CNO	1	Pre	Paired	1	NAc
9	CNO	1	CS	Paired	1	NAc
9	CNO	1	Pre	Unpaired	1	NAc
9	CNO	1	CS	Unpaired	0	NAc
9	Veh	1	Pre	Paired	0	NAc
9	Veh	1	CS	Paired	4	NAc
9	Veh	1	Pre	Unpaired	0	NAc
9	Veh	1	CS	Unpaired	0	NAc
9	Veh	2	Pre	Paired	0	NAc
9	Veh	2	CS	Paired	3	NAc
9	Veh	2	Pre	Unpaired	2	NAc
9	Veh	2	CS	Unpaired	1	NAc
9	CNO	2	Pre	Paired	0	NAc
9	CNO	2	CS	Paired	3	NAc
9	CNO	2	Pre	Unpaired	2	NAc
9	CNO	2	CS	Unpaired	0	NAc
10	Veh	1	Pre	Paired	1	NAc
10	Veh	1	CS	Paired	11	NAc
10	Veh	1	Pre	Unpaired	0	NAc
10	Veh	1	CS	Unpaired	0	NAc
10	CNO	1	Pre	Paired	1	NAc
10	CNO	1	CS	Paired	13	NAc
10	CNO	1	Pre	Unpaired	0	NAc
10	CNO	1	CS	Unpaired	1	NAc
10	CNO	2	Pre	Paired	0	NAc
10	CNO	2	CS	Paired	4	NAc
10	CNO	2	Pre	Unpaired	0	NAc
10	CNO	2	CS	Unpaired	0	NAc
10	Veh	2	Pre	Paired	0	NAc
10	Veh	2	CS	Paired	11	NAc
10	Veh	2	Pre	Unpaired	2	NAc
10	Veh	2	CS	Unpaired	2	NAc
11	CNO	1	Pre	Paired	3	mPFC
11	CNO	1	CS	Paired	13	mPFC
11	CNO	1	Pre	Unpaired	1	mPFC
11	CNO	1	CS	Unpaired	5	mPFC
11	Veh	1	Pre	Paired	2	mPFC
11	Veh	1	CS	Paired	2	mPFC
11	Veh	1	Pre	Unpaired	1	mPFC
11	Veh	1	CS	Unpaired	2	mPFC
11	Veh	2	Pre	Paired	1	mPFC
11	Veh	2	CS	Paired	7	mPFC
11	Veh	2	Pre	Unpaired	0	mPFC
11	Veh	2	CS	Unpaired	0	mPFC
11	CNO	2	Pre	Paired	1	mPFC
11	CNO	2	CS	Paired	12	mPFC
11	CNO	2	Pre	Unpaired	1	mPFC
11	CNO	2	CS	Unpaired	2	mPFC
12	CNO	1	Pre	Paired	1	mPFC
12	CNO	1	CS	Paired	17	mPFC
12	CNO	1	Pre	Unpaired	1	mPFC
12	CNO	1	CS	Unpaired	4	mPFC
12	Veh	1	Pre	Paired	0	mPFC
12	Veh	1	CS	Paired	10	mPFC
12	Veh	1	Pre	Unpaired	1	mPFC
12	Veh	1	CS	Unpaired	1	mPFC
12	Veh	2	Pre	Paired	0	mPFC
12	Veh	2	CS	Paired	21	mPFC
12	Veh	2	Pre	Unpaired	2	mPFC
12	Veh	2	CS	Unpaired	3	mPFC
12	CNO	2	Pre	Paired	1	mPFC
12	CNO	2	CS	Paired	11	mPFC
12	CNO	2	Pre	Unpaired	1	mPFC
12	CNO	2	CS	Unpaired	1	mPFC
13	Veh	1	Pre	Paired	1	mPFC
13	Veh	1	CS	Paired	18	mPFC
13	Veh	1	Pre	Unpaired	0	mPFC
13	Veh	1	CS	Unpaired	2	mPFC
13	CNO	1	Pre	Paired	0	mPFC
13	CNO	1	CS	Paired	1	mPFC
13	CNO	1	Pre	Unpaired	1	mPFC
13	CNO	1	CS	Unpaired	0	mPFC
13	CNO	2	Pre	Paired	0	mPFC
13	CNO	2	CS	Paired	0	mPFC
13	CNO	2	Pre	Unpaired	0	mPFC
13	CNO	2	CS	Unpaired	0	mPFC
13	Veh	2	Pre	Paired	2	mPFC
13	Veh	2	CS	Paired	16	mPFC
13	Veh	2	Pre	Unpaired	3	mPFC
13	Veh	2	CS	Unpaired	0	mPFC
14	Veh	1	Pre	Paired	4	mPFC
14	Veh	1	CS	Paired	25	mPFC
14	Veh	1	Pre	Unpaired	10	mPFC
14	Veh	1	CS	Unpaired	14	mPFC
14	CNO	1	Pre	Paired	1	mPFC
14	CNO	1	CS	Paired	12	mPFC
14	CNO	1	Pre	Unpaired	0	mPFC
14	CNO	1	CS	Unpaired	2	mPFC
14	CNO	2	Pre	Paired	0	mPFC
14	CNO	2	CS	Paired	11	mPFC
14	CNO	2	Pre	Unpaired	3	mPFC
14	CNO	2	CS	Unpaired	1	mPFC
14	Veh	2	Pre	Paired	8	mPFC
14	Veh	2	CS	Paired	15	mPFC
14	Veh	2	Pre	Unpaired	3	mPFC
14	Veh	2	CS	Unpaired	5	mPFC
15	CNO	1	Pre	Paired	0	mPFC
15	CNO	1	CS	Paired	3	mPFC
15	CNO	1	Pre	Unpaired	0	mPFC
15	CNO	1	CS	Unpaired	0	mPFC
15	Veh	1	Pre	Paired	0	mPFC
15	Veh	1	CS	Paired	5	mPFC
15	Veh	1	Pre	Unpaired	2	mPFC
15	Veh	1	CS	Unpaired	0	mPFC
15	Veh	2	Pre	Paired	2	mPFC
15	Veh	2	CS	Paired	2	mPFC
15	Veh	2	Pre	Unpaired	0	mPFC
15	Veh	2	CS	Unpaired	0	mPFC
15	CNO	2	Pre	Paired	1	mPFC
15	CNO	2	CS	Paired	5	mPFC
15	CNO	2	Pre	Unpaired	1	mPFC
15	CNO	2	CS	Unpaired	0	mPFC
16	CNO	1	Pre	Paired	0	mPFC
16	CNO	1	CS	Paired	1	mPFC
16	CNO	1	Pre	Unpaired	0	mPFC
16	CNO	1	CS	Unpaired	0	mPFC
16	Veh	1	Pre	Paired	1	mPFC
16	Veh	1	CS	Paired	3	mPFC
16	Veh	1	Pre	Unpaired	0	mPFC
16	Veh	1	CS	Unpaired	0	mPFC
16	Veh	2	Pre	Paired	0	mPFC
16	Veh	2	CS	Paired	3	mPFC
16	Veh	2	Pre	Unpaired	0	mPFC
16	Veh	2	CS	Unpaired	0	mPFC
16	CNO	2	Pre	Paired	0	mPFC
16	CNO	2	CS	Paired	18	mPFC
16	CNO	2	Pre	Unpaired	2	mPFC
16	CNO	2	CS	Unpaired	1	mPFC
18	Veh	1	Pre	Paired	0	mPFC
18	Veh	1	CS	Paired	6	mPFC
18	Veh	1	Pre	Unpaired	0	mPFC
18	Veh	1	CS	Unpaired	1	mPFC
18	CNO	1	Pre	Paired	2	mPFC
18	CNO	1	CS	Paired	5	mPFC
18	CNO	1	Pre	Unpaired	0	mPFC
18	CNO	1	CS	Unpaired	1	mPFC
18	CNO	2	Pre	Paired	1	mPFC
18	CNO	2	CS	Paired	10	mPFC
18	CNO	2	Pre	Unpaired	0	mPFC
18	CNO	2	CS	Unpaired	2	mPFC
18	Veh	2	Pre	Paired	1	mPFC
18	Veh	2	CS	Paired	11	mPFC
18	Veh	2	Pre	Unpaired	1	mPFC
18	Veh	2	CS	Unpaired	3	mPFC
19	CNO	1	Pre	Paired	0	mPFC
19	CNO	1	CS	Paired	1	mPFC
19	CNO	1	Pre	Unpaired	0	mPFC
19	CNO	1	CS	Unpaired	0	mPFC
19	Veh	1	Pre	Paired	0	mPFC
19	Veh	1	CS	Paired	0	mPFC
19	Veh	1	Pre	Unpaired	1	mPFC
19	Veh	1	CS	Unpaired	0	mPFC
19	Veh	2	Pre	Paired	1	mPFC
19	Veh	2	CS	Paired	6	mPFC
19	Veh	2	Pre	Unpaired	1	mPFC
19	Veh	2	CS	Unpaired	2	mPFC
19	CNO	2	Pre	Paired	0	mPFC
19	CNO	2	CS	Paired	1	mPFC
19	CNO	2	Pre	Unpaired	0	mPFC
19	CNO	2	CS	Unpaired	3	mPFC
20	Veh	1	Pre	Paired	0	mPFC
20	Veh	1	CS	Paired	5	mPFC
20	Veh	1	Pre	Unpaired	0	mPFC
20	Veh	1	CS	Unpaired	0	mPFC
20	CNO	1	Pre	Paired	0	mPFC
20	CNO	1	CS	Paired	0	mPFC
20	CNO	1	Pre	Unpaired	0	mPFC
20	CNO	1	CS	Unpaired	0	mPFC
20	CNO	2	Pre	Paired	0	mPFC
20	CNO	2	CS	Paired	1	mPFC
20	CNO	2	Pre	Unpaired	0	mPFC
20	CNO	2	CS	Unpaired	0	mPFC
20	Veh	2	Pre	Paired	1	mPFC
20	Veh	2	CS	Paired	9	mPFC
20	Veh	2	Pre	Unpaired	1	mPFC
20	Veh	2	CS	Unpaired	0	mPFC

## Sheet: Fig4_S4
Rat	DrugSession	Drug	CSType	CSPeriod	BoutsOfNonContingentApproach	Site
1	1	CNO	Paired	Pre	11	NAc
1	1	CNO	Unpaired	Pre	16	NAc
1	1	CNO	Paired	CS	50	NAc
1	1	CNO	Unpaired	CS	27	NAc
1	1	Veh	Paired	Pre	12	NAc
1	1	Veh	Unpaired	Pre	11	NAc
1	1	Veh	Paired	CS	47	NAc
1	1	Veh	Unpaired	CS	14	NAc
1	2	CNO	Paired	Pre	4	NAc
1	2	CNO	Unpaired	Pre	6	NAc
1	2	CNO	Paired	CS	13	NAc
1	2	CNO	Unpaired	CS	9	NAc
1	2	Veh	Paired	Pre	6	NAc
1	2	Veh	Unpaired	Pre	9	NAc
1	2	Veh	Paired	CS	41	NAc
1	2	Veh	Unpaired	CS	13	NAc
2	1	CNO	Paired	Pre	0	NAc
2	1	CNO	Unpaired	Pre	0	NAc
2	1	CNO	Paired	CS	43	NAc
2	1	CNO	Unpaired	CS	12	NAc
2	1	Veh	Paired	Pre	3	NAc
2	1	Veh	Unpaired	Pre	0	NAc
2	1	Veh	Paired	CS	40	NAc
2	1	Veh	Unpaired	CS	2	NAc
2	2	CNO	Paired	Pre	6	NAc
2	2	CNO	Unpaired	Pre	0	NAc
2	2	CNO	Paired	CS	29	NAc
2	2	CNO	Unpaired	CS	7	NAc
2	2	Veh	Paired	Pre	4	NAc
2	2	Veh	Unpaired	Pre	11	NAc
2	2	Veh	Paired	CS	28	NAc
2	2	Veh	Unpaired	CS	4	NAc
4	1	CNO	Paired	Pre	0	NAc
4	1	CNO	Unpaired	Pre	0	NAc
4	1	CNO	Paired	CS	33	NAc
4	1	CNO	Unpaired	CS	0	NAc
4	1	Veh	Paired	Pre	0	NAc
4	1	Veh	Unpaired	Pre	0	NAc
4	1	Veh	Paired	CS	28	NAc
4	1	Veh	Unpaired	CS	1	NAc
4	2	CNO	Paired	Pre	0	NAc
4	2	CNO	Unpaired	Pre	0	NAc
4	2	CNO	Paired	CS	43	NAc
4	2	CNO	Unpaired	CS	0	NAc
4	2	Veh	Paired	Pre	15	NAc
4	2	Veh	Unpaired	Pre	3	NAc
4	2	Veh	Paired	CS	26	NAc
4	2	Veh	Unpaired	CS	21	NAc
5	1	CNO	Paired	Pre	10	NAc
5	1	CNO	Unpaired	Pre	9	NAc
5	1	CNO	Paired	CS	23	NAc
5	1	CNO	Unpaired	CS	5	NAc
5	1	Veh	Paired	Pre	3	NAc
5	1	Veh	Unpaired	Pre	7	NAc
5	1	Veh	Paired	CS	27	NAc
5	1	Veh	Unpaired	CS	2	NAc
5	2	CNO	Paired	Pre	4	NAc
5	2	CNO	Unpaired	Pre	2	NAc
5	2	CNO	Paired	CS	13	NAc
5	2	CNO	Unpaired	CS	2	NAc
5	2	Veh	Paired	Pre	5	NAc
5	2	Veh	Unpaired	Pre	2	NAc
5	2	Veh	Paired	CS	14	NAc
5	2	Veh	Unpaired	CS	5	NAc
8	1	CNO	Paired	Pre	0	NAc
8	1	CNO	Unpaired	Pre	4	NAc
8	1	CNO	Paired	CS	30	NAc
8	1	CNO	Unpaired	CS	4	NAc
8	1	Veh	Paired	Pre	12	NAc
8	1	Veh	Unpaired	Pre	7	NAc
8	1	Veh	Paired	CS	28	NAc
8	1	Veh	Unpaired	CS	13	NAc
8	2	CNO	Paired	Pre	0	NAc
8	2	CNO	Unpaired	Pre	0	NAc
8	2	CNO	Paired	CS	13	NAc
8	2	CNO	Unpaired	CS	2	NAc
8	2	Veh	Paired	Pre	4	NAc
8	2	Veh	Unpaired	Pre	0	NAc
8	2	Veh	Paired	CS	29	NAc
8	2	Veh	Unpaired	CS	10	NAc
9	1	CNO	Paired	Pre	9	NAc
9	1	CNO	Unpaired	Pre	12	NAc
9	1	CNO	Paired	CS	29	NAc
9	1	CNO	Unpaired	CS	18	NAc
9	1	Veh	Paired	Pre	2	NAc
9	1	Veh	Unpaired	Pre	5	NAc
9	1	Veh	Paired	CS	10	NAc
9	1	Veh	Unpaired	CS	7	NAc
9	2	CNO	Paired	Pre	2	NAc
9	2	CNO	Unpaired	Pre	6	NAc
9	2	CNO	Paired	CS	27	NAc
9	2	CNO	Unpaired	CS	10	NAc
9	2	Veh	Paired	Pre	5	NAc
9	2	Veh	Unpaired	Pre	2	NAc
9	2	Veh	Paired	CS	21	NAc
9	2	Veh	Unpaired	CS	4	NAc
10	1	CNO	Paired	Pre	4	NAc
10	1	CNO	Unpaired	Pre	1	NAc
10	1	CNO	Paired	CS	56	NAc
10	1	CNO	Unpaired	CS	10	NAc
10	1	Veh	Paired	Pre	5	NAc
10	1	Veh	Unpaired	Pre	4	NAc
10	1	Veh	Paired	CS	24	NAc
10	1	Veh	Unpaired	CS	2	NAc
10	2	CNO	Paired	Pre	2	NAc
10	2	CNO	Unpaired	Pre	1	NAc
10	2	CNO	Paired	CS	12	NAc
10	2	CNO	Unpaired	CS	1	NAc
10	2	Veh	Paired	Pre	5	NAc
10	2	Veh	Unpaired	Pre	5	NAc
10	2	Veh	Paired	CS	68	NAc
10	2	Veh	Unpaired	CS	14	NAc
11	1	CNO	Paired	Pre	10	mPFC
11	1	CNO	Unpaired	Pre	14	mPFC
11	1	CNO	Paired	CS	37	mPFC
11	1	CNO	Unpaired	CS	12	mPFC
11	1	Veh	Paired	Pre	9	mPFC
11	1	Veh	Unpaired	Pre	6	mPFC
11	1	Veh	Paired	CS	12	mPFC
11	1	Veh	Unpaired	CS	6	mPFC
11	2	CNO	Paired	Pre	3	mPFC
11	2	CNO	Unpaired	Pre	4	mPFC
11	2	CNO	Paired	CS	41	mPFC
11	2	CNO	Unpaired	CS	12	mPFC
11	2	Veh	Paired	Pre	13	mPFC
11	2	Veh	Unpaired	Pre	1	mPFC
11	2	Veh	Paired	CS	18	mPFC
11	2	Veh	Unpaired	CS	4	mPFC
12	1	CNO	Paired	Pre	4	mPFC
12	1	CNO	Unpaired	Pre	11	mPFC
12	1	CNO	Paired	CS	42	mPFC
12	1	CNO	Unpaired	CS	15	mPFC
12	1	Veh	Paired	Pre	0	mPFC
12	1	Veh	Unpaired	Pre	0	mPFC
12	1	Veh	Paired	CS	32	mPFC
12	1	Veh	Unpaired	CS	0	mPFC
12	2	CNO	Paired	Pre	2	mPFC
12	2	CNO	Unpaired	Pre	2	mPFC
12	2	CNO	Paired	CS	26	mPFC
12	2	CNO	Unpaired	CS	0	mPFC
12	2	Veh	Paired	Pre	1	mPFC
12	2	Veh	Unpaired	Pre	0	mPFC
12	2	Veh	Paired	CS	44	mPFC
12	2	Veh	Unpaired	CS	3	mPFC
13	1	CNO	Paired	Pre	0	mPFC
13	1	CNO	Unpaired	Pre	7	mPFC
13	1	CNO	Paired	CS	5	mPFC
13	1	CNO	Unpaired	CS	0	mPFC
13	1	Veh	Paired	Pre	8	mPFC
13	1	Veh	Unpaired	Pre	8	mPFC
13	1	Veh	Paired	CS	28	mPFC
13	1	Veh	Unpaired	CS	6	mPFC
13	2	CNO	Paired	Pre	1	mPFC
13	2	CNO	Unpaired	Pre	7	mPFC
13	2	CNO	Paired	CS	5	mPFC
13	2	CNO	Unpaired	CS	0	mPFC
13	2	Veh	Paired	Pre	6	mPFC
13	2	Veh	Unpaired	Pre	5	mPFC
13	2	Veh	Paired	CS	18	mPFC
13	2	Veh	Unpaired	CS	1	mPFC
14	1	CNO	Paired	Pre	6	mPFC
14	1	CNO	Unpaired	Pre	13	mPFC
14	1	CNO	Paired	CS	26	mPFC
14	1	CNO	Unpaired	CS	14	mPFC
14	1	Veh	Paired	Pre	14	mPFC
14	1	Veh	Unpaired	Pre	14	mPFC
14	1	Veh	Paired	CS	45	mPFC
14	1	Veh	Unpaired	CS	28	mPFC
14	2	CNO	Paired	Pre	3	mPFC
14	2	CNO	Unpaired	Pre	9	mPFC
14	2	CNO	Paired	CS	23	mPFC
14	2	CNO	Unpaired	CS	14	mPFC
14	2	Veh	Paired	Pre	9	mPFC
14	2	Veh	Unpaired	Pre	9	mPFC
14	2	Veh	Paired	CS	45	mPFC
14	2	Veh	Unpaired	CS	10	mPFC
15	1	CNO	Paired	Pre	1	mPFC
15	1	CNO	Unpaired	Pre	4	mPFC
15	1	CNO	Paired	CS	9	mPFC
15	1	CNO	Unpaired	CS	2	mPFC
15	1	Veh	Paired	Pre	9	mPFC
15	1	Veh	Unpaired	Pre	3	mPFC
15	1	Veh	Paired	CS	12	mPFC
15	1	Veh	Unpaired	CS	3	mPFC
15	2	CNO	Paired	Pre	23	mPFC
15	2	CNO	Unpaired	Pre	29	mPFC
15	2	CNO	Paired	CS	36	mPFC
15	2	CNO	Unpaired	CS	14	mPFC
15	2	Veh	Paired	Pre	3	mPFC
15	2	Veh	Unpaired	Pre	1	mPFC
15	2	Veh	Paired	CS	11	mPFC
15	2	Veh	Unpaired	CS	1	mPFC
16	1	CNO	Paired	Pre	2	mPFC
16	1	CNO	Unpaired	Pre	2	mPFC
16	1	CNO	Paired	CS	9	mPFC
16	1	CNO	Unpaired	CS	0	mPFC
16	1	Veh	Paired	Pre	13	mPFC
16	1	Veh	Unpaired	Pre	4	mPFC
16	1	Veh	Paired	CS	24	mPFC
16	1	Veh	Unpaired	CS	8	mPFC
16	2	CNO	Paired	Pre	4	mPFC
16	2	CNO	Unpaired	Pre	2	mPFC
16	2	CNO	Paired	CS	40	mPFC
16	2	CNO	Unpaired	CS	1	mPFC
16	2	Veh	Paired	Pre	1	mPFC
16	2	Veh	Unpaired	Pre	0	mPFC
16	2	Veh	Paired	CS	37	mPFC
16	2	Veh	Unpaired	CS	1	mPFC
18	1	CNO	Paired	Pre	4	mPFC
18	1	CNO	Unpaired	Pre	0	mPFC
18	1	CNO	Paired	CS	46	mPFC
18	1	CNO	Unpaired	CS	11	mPFC
18	1	Veh	Paired	Pre	0	mPFC
18	1	Veh	Unpaired	Pre	4	mPFC
18	1	Veh	Paired	CS	16	mPFC
18	1	Veh	Unpaired	CS	7	mPFC
18	2	CNO	Paired	Pre	4	mPFC
18	2	CNO	Unpaired	Pre	5	mPFC
18	2	CNO	Paired	CS	57	mPFC
18	2	CNO	Unpaired	CS	11	mPFC
18	2	Veh	Paired	Pre	2	mPFC
18	2	Veh	Unpaired	Pre	1	mPFC
18	2	Veh	Paired	CS	56	mPFC
18	2	Veh	Unpaired	CS	4	mPFC
19	1	CNO	Paired	Pre	0	mPFC
19	1	CNO	Unpaired	Pre	3	mPFC
19	1	CNO	Paired	CS	12	mPFC
19	1	CNO	Unpaired	CS	2	mPFC
19	1	Veh	Paired	Pre	3	mPFC
19	1	Veh	Unpaired	Pre	0	mPFC
19	1	Veh	Paired	CS	7	mPFC
19	1	Veh	Unpaired	CS	6	mPFC
19	2	CNO	Paired	Pre	3	mPFC
19	2	CNO	Unpaired	Pre	5	mPFC
19	2	CNO	Paired	CS	20	mPFC
19	2	CNO	Unpaired	CS	5	mPFC
19	2	Veh	Paired	Pre	4	mPFC
19	2	Veh	Unpaired	Pre	3	mPFC
19	2	Veh	Paired	CS	14	mPFC
19	2	Veh	Unpaired	CS	8	mPFC
20	1	CNO	Paired	Pre	0	mPFC
20	1	CNO	Unpaired	Pre	1	mPFC
20	1	CNO	Paired	CS	31	mPFC
20	1	CNO	Unpaired	CS	1	mPFC
20	1	Veh	Paired	Pre	0	mPFC
20	1	Veh	Unpaired	Pre	0	mPFC
20	1	Veh	Paired	CS	12	mPFC
20	1	Veh	Unpaired	CS	0	mPFC
20	2	CNO	Paired	Pre	0	mPFC
20	2	CNO	Unpaired	Pre	1	mPFC
20	2	CNO	Paired	CS	18	mPFC
20	2	CNO	Unpaired	CS	5	mPFC
20	2	Veh	Paired	Pre	9	mPFC
20	2	Veh	Unpaired	Pre	4	mPFC
20	2	Veh	Paired	CS	54	mPFC
20	2	Veh	Unpaired	CS	6	mPFC

## Sheet: Fig4_S5
Rat	Group	DeltaPressesWithoutApproach_Veh	CNOSuppression
1	mCherry	3	-10
3	hM4Di	12	-11
4	hM4Di	6	-10
5	mCherry	11	-27
6	mCherry	6	5
7	hM4Di	-5	-21
9	mCherry	-3	7
10	hM4Di	13	-3
12	hM4Di	3	1
13	mCherry	18	2
15	mCherry	17	8
16	hM4Di	4	0
18	hM4Di	7	-5
19	hM4Di	-12	-24
20	hM4Di	13	3
21	hM4Di	11	-8
22	mCherry	7	-7
23	mCherry	4	-23
31	hM4Di	2	10
33	hM4Di	29	-34
34	mCherry	-4	1
36	mCherry	1	9
37	mCherry	25	-31
38	mCherry	8	0
39	hM4Di	4	-37
40	hM4Di	1	-32
41	hM4Di	11	-15
51	hM4Di	2	0
52	hM4Di	14	-29
53	hM4Di	13	-13
57	mCherry	1	10
58	mCherry	-4	-6
