# Supplementary material for: Mesolimbic dopamine projections mediate cue-motivated reward seeking but not reward retrieval in rats
Source: eLife journal article supplement (doi:10.7554/elife.43551), 2019-05-20
Supplement: supp [file elife-43551-supp-v1.zip › elife_poa_e43551_Figure_5_source_data_1.xlsx]

## Sheet: Figure 5B
Rat	Group	Drug	Lever	LeverPresses
4	hM4Di	CNO	Devalue	1
4	hM4Di	Veh	Devalue	3
5	hM4Di	CNO	Devalue	10
5	hM4Di	Veh	Devalue	15
5	hM4Di	CNO	Devalue	2
5	hM4Di	Veh	Devalue	10
9	mCherry	CNO	Devalue	7
9	mCherry	Veh	Devalue	10
9	mCherry	CNO	Devalue	3
9	mCherry	Veh	Devalue	1
10	mCherry	CNO	Devalue	1
10	mCherry	Veh	Devalue	1
10	mCherry	CNO	Devalue	3
10	mCherry	Veh	Devalue	0
11	mCherry	CNO	Devalue	19
11	mCherry	Veh	Devalue	14
11	mCherry	CNO	Devalue	6
11	mCherry	Veh	Devalue	7
12	mCherry	CNO	Devalue	24
12	mCherry	Veh	Devalue	5
12	mCherry	CNO	Devalue	6
12	mCherry	Veh	Devalue	6
13	hM4Di	CNO	Devalue	16
13	hM4Di	Veh	Devalue	28
13	hM4Di	CNO	Devalue	4
13	hM4Di	Veh	Devalue	8
14	hM4Di	CNO	Devalue	24
14	hM4Di	Veh	Devalue	13
14	hM4Di	CNO	Devalue	6
14	hM4Di	Veh	Devalue	8
15	hM4Di	CNO	Devalue	7
15	hM4Di	Veh	Devalue	6
15	hM4Di	CNO	Devalue	0
15	hM4Di	Veh	Devalue	0
16	hM4Di	CNO	Devalue	12
16	hM4Di	Veh	Devalue	17
16	hM4Di	CNO	Devalue	7
16	hM4Di	Veh	Devalue	25
17	hM4Di	CNO	Devalue	17
17	hM4Di	Veh	Devalue	19
17	hM4Di	CNO	Devalue	3
17	hM4Di	Veh	Devalue	9
18	hM4Di	CNO	Devalue	13
18	hM4Di	Veh	Devalue	3
18	hM4Di	CNO	Devalue	62
18	hM4Di	Veh	Devalue	24
19	mCherry	CNO	Devalue	3
19	mCherry	Veh	Devalue	4
19	mCherry	CNO	Devalue	3
19	mCherry	Veh	Devalue	0
20	mCherry	CNO	Devalue	4
20	mCherry	Veh	Devalue	13
20	mCherry	CNO	Devalue	16
20	mCherry	Veh	Devalue	16
21	mCherry	CNO	Devalue	5
21	mCherry	Veh	Devalue	5
21	mCherry	CNO	Devalue	0
21	mCherry	Veh	Devalue	13
22	mCherry	CNO	Devalue	5
22	mCherry	Veh	Devalue	12
22	mCherry	CNO	Devalue	9
22	mCherry	Veh	Devalue	2
23	mCherry	CNO	Devalue	8
23	mCherry	Veh	Devalue	5
23	mCherry	CNO	Devalue	5
23	mCherry	Veh	Devalue	12
24	hM4Di	CNO	Devalue	11
24	hM4Di	Veh	Devalue	10
24	hM4Di	CNO	Devalue	15
24	hM4Di	Veh	Devalue	6
25	hM4Di	CNO	Devalue	5
25	hM4Di	Veh	Devalue	3
25	hM4Di	CNO	Devalue	1
25	hM4Di	Veh	Devalue	4
26	hM4Di	CNO	Devalue	2
26	hM4Di	Veh	Devalue	3
26	hM4Di	CNO	Devalue	8
26	hM4Di	Veh	Devalue	2
4	hM4Di	CNO	Value	83
4	hM4Di	Veh	Value	63
5	hM4Di	CNO	Value	12
5	hM4Di	Veh	Value	14
5	hM4Di	CNO	Value	31
5	hM4Di	Veh	Value	45
9	mCherry	CNO	Value	8
9	mCherry	Veh	Value	7
9	mCherry	CNO	Value	86
9	mCherry	Veh	Value	145
10	mCherry	CNO	Value	3
10	mCherry	Veh	Value	0
10	mCherry	CNO	Value	127
10	mCherry	Veh	Value	114
11	mCherry	CNO	Value	4
11	mCherry	Veh	Value	9
11	mCherry	CNO	Value	18
11	mCherry	Veh	Value	16
12	mCherry	CNO	Value	38
12	mCherry	Veh	Value	9
12	mCherry	CNO	Value	107
12	mCherry	Veh	Value	92
13	hM4Di	CNO	Value	11
13	hM4Di	Veh	Value	11
13	hM4Di	CNO	Value	25
13	hM4Di	Veh	Value	24
14	hM4Di	CNO	Value	10
14	hM4Di	Veh	Value	10
14	hM4Di	CNO	Value	20
14	hM4Di	Veh	Value	24
15	hM4Di	CNO	Value	1
15	hM4Di	Veh	Value	1
15	hM4Di	CNO	Value	1
15	hM4Di	Veh	Value	15
16	hM4Di	CNO	Value	16
16	hM4Di	Veh	Value	15
16	hM4Di	CNO	Value	37
16	hM4Di	Veh	Value	30
17	hM4Di	CNO	Value	12
17	hM4Di	Veh	Value	6
17	hM4Di	CNO	Value	28
17	hM4Di	Veh	Value	38
18	hM4Di	CNO	Value	29
18	hM4Di	Veh	Value	7
18	hM4Di	CNO	Value	17
18	hM4Di	Veh	Value	96
19	mCherry	CNO	Value	2
19	mCherry	Veh	Value	0
19	mCherry	CNO	Value	15
19	mCherry	Veh	Value	5
20	mCherry	CNO	Value	5
20	mCherry	Veh	Value	6
20	mCherry	CNO	Value	55
20	mCherry	Veh	Value	41
21	mCherry	CNO	Value	21
21	mCherry	Veh	Value	3
21	mCherry	CNO	Value	56
21	mCherry	Veh	Value	53
22	mCherry	CNO	Value	24
22	mCherry	Veh	Value	15
22	mCherry	CNO	Value	55
22	mCherry	Veh	Value	172
23	mCherry	CNO	Value	3
23	mCherry	Veh	Value	1
23	mCherry	CNO	Value	9
23	mCherry	Veh	Value	26
24	hM4Di	CNO	Value	9
24	hM4Di	Veh	Value	4
24	hM4Di	CNO	Value	47
24	hM4Di	Veh	Value	43
25	hM4Di	CNO	Value	0
25	hM4Di	Veh	Value	1
25	hM4Di	CNO	Value	100
25	hM4Di	Veh	Value	86
26	hM4Di	CNO	Value	9
26	hM4Di	Veh	Value	0
26	hM4Di	CNO	Value	82
26	hM4Di	Veh	Value	66

## Sheet: Figure 5C
Rat	Group	Drug	Lever	PropPressesFollowedByApproach	SqrtPropPressesFollowedByApproach
4	hM4Di	CNO	Devalue	1	1
4	hM4Di	Veh	Devalue	0.666667	0.816497
5	hM4Di	CNO	Devalue	0.4	0.632456
5	hM4Di	Veh	Devalue	0.333333	0.57735
5	hM4Di	CNO	Devalue	0.5	0.707107
5	hM4Di	Veh	Devalue	0.6	0.774597
9	mCherry	CNO	Devalue	0.571429	0.755929
9	mCherry	Veh	Devalue	0.5	0.707107
9	mCherry	CNO	Devalue	0.333333	0.57735
9	mCherry	Veh	Devalue	1	1
10	mCherry	CNO	Devalue	0	0
10	mCherry	Veh	Devalue	0	0
10	mCherry	CNO	Devalue	0.666667	0.816497
10	mCherry	Veh	Devalue
11	mCherry	CNO	Devalue	0.263158	0.512989
11	mCherry	Veh	Devalue	0.142857	0.377964
11	mCherry	CNO	Devalue	0.5	0.707107
11	mCherry	Veh	Devalue	0.857143	0.92582
12	mCherry	CNO	Devalue	0.166667	0.408248
12	mCherry	Veh	Devalue	0.4	0.632456
12	mCherry	CNO	Devalue	0.5	0.707107
12	mCherry	Veh	Devalue	0.166667	0.408248
13	hM4Di	CNO	Devalue	0.3125	0.559017
13	hM4Di	Veh	Devalue	0.142857	0.377964
13	hM4Di	CNO	Devalue	0.5	0.707107
13	hM4Di	Veh	Devalue	0.375	0.612372
14	hM4Di	CNO	Devalue	0.291667	0.540062
14	hM4Di	Veh	Devalue	0.307692	0.5547
14	hM4Di	CNO	Devalue	0.333333	0.57735
14	hM4Di	Veh	Devalue	0.375	0.612372
15	hM4Di	CNO	Devalue	0.142857	0.377964
15	hM4Di	Veh	Devalue	0.333333	0.57735
15	hM4Di	CNO	Devalue
15	hM4Di	Veh	Devalue
16	hM4Di	CNO	Devalue	0.166667	0.408248
16	hM4Di	Veh	Devalue	0.176471	0.420084
16	hM4Di	CNO	Devalue	0.285714	0.534522
16	hM4Di	Veh	Devalue	0.48	0.69282
17	hM4Di	CNO	Devalue	0.0588235	0.242536
17	hM4Di	Veh	Devalue	0.0526316	0.229416
17	hM4Di	CNO	Devalue	0.666667	0.816497
17	hM4Di	Veh	Devalue	0.666667	0.816497
18	hM4Di	CNO	Devalue	0.153846	0.392232
18	hM4Di	Veh	Devalue	0	0
18	hM4Di	CNO	Devalue	0.258065	0.508001
18	hM4Di	Veh	Devalue	0.375	0.612372
19	mCherry	CNO	Devalue	0.333333	0.57735
19	mCherry	Veh	Devalue	0.5	0.707107
19	mCherry	CNO	Devalue	0.666667	0.816497
19	mCherry	Veh	Devalue
20	mCherry	CNO	Devalue	0.5	0.707107
20	mCherry	Veh	Devalue	0.307692	0.5547
20	mCherry	CNO	Devalue	0.4375	0.661438
20	mCherry	Veh	Devalue	0.5	0.707107
21	mCherry	CNO	Devalue	0.6	0.774597
21	mCherry	Veh	Devalue	0	0
21	mCherry	CNO	Devalue
21	mCherry	Veh	Devalue	0.538462	0.733799
22	mCherry	CNO	Devalue	0.2	0.447214
22	mCherry	Veh	Devalue	0.166667	0.408248
22	mCherry	CNO	Devalue	0.555556	0.745356
22	mCherry	Veh	Devalue	0	0
23	mCherry	CNO	Devalue	0.375	0.612372
23	mCherry	Veh	Devalue	0.4	0.632456
23	mCherry	CNO	Devalue	1	1
23	mCherry	Veh	Devalue	0.833333	0.912871
24	hM4Di	CNO	Devalue	0.272727	0.522233
24	hM4Di	Veh	Devalue	0.3	0.547723
24	hM4Di	CNO	Devalue	0.6	0.774597
24	hM4Di	Veh	Devalue	0.666667	0.816497
25	hM4Di	CNO	Devalue	0.2	0.447214
25	hM4Di	Veh	Devalue	0.333333	0.57735
25	hM4Di	CNO	Devalue	1	1
25	hM4Di	Veh	Devalue	0.75	0.866025
26	hM4Di	CNO	Devalue	0.5	0.707107
26	hM4Di	Veh	Devalue	0.333333	0.57735
26	hM4Di	CNO	Devalue	0.375	0.612372
26	hM4Di	Veh	Devalue	0	0
4	hM4Di	CNO	Value	0.120482	0.347105
4	hM4Di	Veh	Value	0.126984	0.356348
5	hM4Di	CNO	Value	0.583333	0.763763
5	hM4Di	Veh	Value	0.428571	0.654654
5	hM4Di	CNO	Value	0.193548	0.439941
5	hM4Di	Veh	Value	0.133333	0.365148
9	mCherry	CNO	Value	0.25	0.5
9	mCherry	Veh	Value	0.285714	0.534522
9	mCherry	CNO	Value	0.151163	0.388797
9	mCherry	Veh	Value	0.062069	0.249136
10	mCherry	CNO	Value	0	0
10	mCherry	Veh	Value
10	mCherry	CNO	Value	0.0393701	0.198419
10	mCherry	Veh	Value	0.0350877	0.187317
11	mCherry	CNO	Value	0.75	0.866025
11	mCherry	Veh	Value	0.777778	0.881917
11	mCherry	CNO	Value	0.166667	0.408248
11	mCherry	Veh	Value	0.375	0.612372
12	mCherry	CNO	Value	0.315789	0.561951
12	mCherry	Veh	Value	0.444444	0.666667
12	mCherry	CNO	Value	0.0934579	0.305709
12	mCherry	Veh	Value	0.173913	0.417029
13	hM4Di	CNO	Value	0.727273	0.852803
13	hM4Di	Veh	Value	0.454545	0.6742
13	hM4Di	CNO	Value	0.2	0.447214
13	hM4Di	Veh	Value	0.25	0.5
14	hM4Di	CNO	Value	0.5	0.707107
14	hM4Di	Veh	Value	0.4	0.632456
14	hM4Di	CNO	Value	0.3	0.547723
14	hM4Di	Veh	Value	0.208333	0.456435
15	hM4Di	CNO	Value	0	0
15	hM4Di	Veh	Value	0	0
15	hM4Di	CNO	Value	0	0
15	hM4Di	Veh	Value	0.2	0.447214
16	hM4Di	CNO	Value	0.4375	0.661438
16	hM4Di	Veh	Value	0.2	0.447214
16	hM4Di	CNO	Value	0.243243	0.493197
16	hM4Di	Veh	Value	0.3	0.547723
17	hM4Di	CNO	Value	0.333333	0.57735
17	hM4Di	Veh	Value	0.666667	0.816497
17	hM4Di	CNO	Value	0.0714286	0.267261
17	hM4Di	Veh	Value	0.157895	0.39736
18	hM4Di	CNO	Value	0.275862	0.525226
18	hM4Di	Veh	Value	0.428571	0.654654
18	hM4Di	CNO	Value	0.176471	0.420084
18	hM4Di	Veh	Value	0.0520833	0.228218
19	mCherry	CNO	Value	1	1
19	mCherry	Veh	Value
19	mCherry	CNO	Value	0.266667	0.516398
19	mCherry	Veh	Value	0.4	0.632456
20	mCherry	CNO	Value	0.4	0.632456
20	mCherry	Veh	Value	0.666667	0.816497
20	mCherry	CNO	Value	0.0727273	0.26968
20	mCherry	Veh	Value	0.170732	0.413197
21	mCherry	CNO	Value	0.333333	0.57735
21	mCherry	Veh	Value	0.333333	0.57735
21	mCherry	CNO	Value	0.125	0.353553
21	mCherry	Veh	Value	0.283019	0.531995
22	mCherry	CNO	Value	0.166667	0.408248
22	mCherry	Veh	Value	0.4	0.632456
22	mCherry	CNO	Value	0.0909091	0.301511
22	mCherry	Veh	Value	0.0348837	0.186772
23	mCherry	CNO	Value	1	1
23	mCherry	Veh	Value	1	1
23	mCherry	CNO	Value	0.555556	0.745356
23	mCherry	Veh	Value	0.423077	0.650444
24	hM4Di	CNO	Value	0.333333	0.57735
24	hM4Di	Veh	Value	0.5	0.707107
24	hM4Di	CNO	Value	0.170213	0.412568
24	hM4Di	Veh	Value	0.116279	0.340997
25	hM4Di	CNO	Value
25	hM4Di	Veh	Value	1	1
25	hM4Di	CNO	Value	0.08	0.282843
25	hM4Di	Veh	Value	0.162791	0.403473
26	hM4Di	CNO	Value	0.555556	0.745356
26	hM4Di	Veh	Value
26	hM4Di	CNO	Value	0.0731707	0.270501
26	hM4Di	Veh	Value	0.0909091	0.301511

## Sheet: Figure 5D
Rat	Group	Drug	LeverType	LeverPresses	ResponseType
4	hM4Di	CNO	Devalue	0	PressesWithoutApproach
4	hM4Di	CNO	Value	73	PressesWithoutApproach
4	hM4Di	CNO	Devalue	1	PressesWithApproach
4	hM4Di	CNO	Value	10	PressesWithApproach
4	hM4Di	Veh	Devalue	1	PressesWithoutApproach
4	hM4Di	Veh	Value	55	PressesWithoutApproach
4	hM4Di	Veh	Devalue	2	PressesWithApproach
4	hM4Di	Veh	Value	8	PressesWithApproach
5	hM4Di	CNO	Devalue	6	PressesWithoutApproach
5	hM4Di	CNO	Value	5	PressesWithoutApproach
5	hM4Di	CNO	Devalue	4	PressesWithApproach
5	hM4Di	CNO	Value	7	PressesWithApproach
5	hM4Di	Veh	Devalue	10	PressesWithoutApproach
5	hM4Di	Veh	Value	8	PressesWithoutApproach
5	hM4Di	Veh	Devalue	5	PressesWithApproach
5	hM4Di	Veh	Value	6	PressesWithApproach
5	hM4Di	CNO	Devalue	1	PressesWithoutApproach
5	hM4Di	CNO	Value	25	PressesWithoutApproach
5	hM4Di	CNO	Devalue	1	PressesWithApproach
5	hM4Di	CNO	Value	6	PressesWithApproach
5	hM4Di	Veh	Devalue	4	PressesWithoutApproach
5	hM4Di	Veh	Value	39	PressesWithoutApproach
5	hM4Di	Veh	Devalue	6	PressesWithApproach
5	hM4Di	Veh	Value	6	PressesWithApproach
9	mCherry	CNO	Devalue	3	PressesWithoutApproach
9	mCherry	CNO	Value	6	PressesWithoutApproach
9	mCherry	CNO	Devalue	4	PressesWithApproach
9	mCherry	CNO	Value	2	PressesWithApproach
9	mCherry	Veh	Devalue	5	PressesWithoutApproach
9	mCherry	Veh	Value	5	PressesWithoutApproach
9	mCherry	Veh	Devalue	5	PressesWithApproach
9	mCherry	Veh	Value	2	PressesWithApproach
9	mCherry	CNO	Devalue	2	PressesWithoutApproach
9	mCherry	CNO	Value	73	PressesWithoutApproach
9	mCherry	CNO	Devalue	1	PressesWithApproach
9	mCherry	CNO	Value	13	PressesWithApproach
9	mCherry	Veh	Devalue	0	PressesWithoutApproach
9	mCherry	Veh	Value	136	PressesWithoutApproach
9	mCherry	Veh	Devalue	1	PressesWithApproach
9	mCherry	Veh	Value	9	PressesWithApproach
10	mCherry	CNO	Devalue	1	PressesWithoutApproach
10	mCherry	CNO	Value	3	PressesWithoutApproach
10	mCherry	CNO	Devalue	0	PressesWithApproach
10	mCherry	CNO	Value	0	PressesWithApproach
10	mCherry	Veh	Devalue	1	PressesWithoutApproach
10	mCherry	Veh	Value	0	PressesWithoutApproach
10	mCherry	Veh	Devalue	0	PressesWithApproach
10	mCherry	Veh	Value	0	PressesWithApproach
10	mCherry	CNO	Devalue	1	PressesWithoutApproach
10	mCherry	CNO	Value	122	PressesWithoutApproach
10	mCherry	CNO	Devalue	2	PressesWithApproach
10	mCherry	CNO	Value	5	PressesWithApproach
10	mCherry	Veh	Devalue	0	PressesWithoutApproach
10	mCherry	Veh	Value	110	PressesWithoutApproach
10	mCherry	Veh	Devalue	0	PressesWithApproach
10	mCherry	Veh	Value	4	PressesWithApproach
11	mCherry	CNO	Devalue	14	PressesWithoutApproach
11	mCherry	CNO	Value	1	PressesWithoutApproach
11	mCherry	CNO	Devalue	5	PressesWithApproach
11	mCherry	CNO	Value	3	PressesWithApproach
11	mCherry	Veh	Devalue	12	PressesWithoutApproach
11	mCherry	Veh	Value	2	PressesWithoutApproach
11	mCherry	Veh	Devalue	2	PressesWithApproach
11	mCherry	Veh	Value	7	PressesWithApproach
11	mCherry	CNO	Devalue	3	PressesWithoutApproach
11	mCherry	CNO	Value	15	PressesWithoutApproach
11	mCherry	CNO	Devalue	3	PressesWithApproach
11	mCherry	CNO	Value	3	PressesWithApproach
11	mCherry	Veh	Devalue	1	PressesWithoutApproach
11	mCherry	Veh	Value	10	PressesWithoutApproach
11	mCherry	Veh	Devalue	6	PressesWithApproach
11	mCherry	Veh	Value	6	PressesWithApproach
12	mCherry	CNO	Devalue	20	PressesWithoutApproach
12	mCherry	CNO	Value	26	PressesWithoutApproach
12	mCherry	CNO	Devalue	4	PressesWithApproach
12	mCherry	CNO	Value	12	PressesWithApproach
12	mCherry	Veh	Devalue	3	PressesWithoutApproach
12	mCherry	Veh	Value	5	PressesWithoutApproach
12	mCherry	Veh	Devalue	2	PressesWithApproach
12	mCherry	Veh	Value	4	PressesWithApproach
12	mCherry	CNO	Devalue	3	PressesWithoutApproach
12	mCherry	CNO	Value	97	PressesWithoutApproach
12	mCherry	CNO	Devalue	3	PressesWithApproach
12	mCherry	CNO	Value	10	PressesWithApproach
12	mCherry	Veh	Devalue	5	PressesWithoutApproach
12	mCherry	Veh	Value	76	PressesWithoutApproach
12	mCherry	Veh	Devalue	1	PressesWithApproach
12	mCherry	Veh	Value	16	PressesWithApproach
13	hM4Di	CNO	Devalue	11	PressesWithoutApproach
13	hM4Di	CNO	Value	3	PressesWithoutApproach
13	hM4Di	CNO	Devalue	5	PressesWithApproach
13	hM4Di	CNO	Value	8	PressesWithApproach
13	hM4Di	Veh	Devalue	24	PressesWithoutApproach
13	hM4Di	Veh	Value	6	PressesWithoutApproach
13	hM4Di	Veh	Devalue	4	PressesWithApproach
13	hM4Di	Veh	Value	5	PressesWithApproach
13	hM4Di	CNO	Devalue	2	PressesWithoutApproach
13	hM4Di	CNO	Value	20	PressesWithoutApproach
13	hM4Di	CNO	Devalue	2	PressesWithApproach
13	hM4Di	CNO	Value	5	PressesWithApproach
13	hM4Di	Veh	Devalue	5	PressesWithoutApproach
13	hM4Di	Veh	Value	18	PressesWithoutApproach
13	hM4Di	Veh	Devalue	3	PressesWithApproach
13	hM4Di	Veh	Value	6	PressesWithApproach
14	hM4Di	CNO	Devalue	17	PressesWithoutApproach
14	hM4Di	CNO	Value	5	PressesWithoutApproach
14	hM4Di	CNO	Devalue	7	PressesWithApproach
14	hM4Di	CNO	Value	5	PressesWithApproach
14	hM4Di	Veh	Devalue	9	PressesWithoutApproach
14	hM4Di	Veh	Value	6	PressesWithoutApproach
14	hM4Di	Veh	Devalue	4	PressesWithApproach
14	hM4Di	Veh	Value	4	PressesWithApproach
14	hM4Di	CNO	Devalue	4	PressesWithoutApproach
14	hM4Di	CNO	Value	14	PressesWithoutApproach
14	hM4Di	CNO	Devalue	2	PressesWithApproach
14	hM4Di	CNO	Value	6	PressesWithApproach
14	hM4Di	Veh	Devalue	5	PressesWithoutApproach
14	hM4Di	Veh	Value	19	PressesWithoutApproach
14	hM4Di	Veh	Devalue	3	PressesWithApproach
14	hM4Di	Veh	Value	5	PressesWithApproach
15	hM4Di	CNO	Devalue	6	PressesWithoutApproach
15	hM4Di	CNO	Value	1	PressesWithoutApproach
15	hM4Di	CNO	Devalue	1	PressesWithApproach
15	hM4Di	CNO	Value	0	PressesWithApproach
15	hM4Di	Veh	Devalue	4	PressesWithoutApproach
15	hM4Di	Veh	Value	1	PressesWithoutApproach
15	hM4Di	Veh	Devalue	2	PressesWithApproach
15	hM4Di	Veh	Value	0	PressesWithApproach
15	hM4Di	CNO	Devalue	0	PressesWithoutApproach
15	hM4Di	CNO	Value	1	PressesWithoutApproach
15	hM4Di	CNO	Devalue	0	PressesWithApproach
15	hM4Di	CNO	Value	0	PressesWithApproach
15	hM4Di	Veh	Devalue	0	PressesWithoutApproach
15	hM4Di	Veh	Value	12	PressesWithoutApproach
15	hM4Di	Veh	Devalue	0	PressesWithApproach
15	hM4Di	Veh	Value	3	PressesWithApproach
16	hM4Di	CNO	Devalue	10	PressesWithoutApproach
16	hM4Di	CNO	Value	9	PressesWithoutApproach
16	hM4Di	CNO	Devalue	2	PressesWithApproach
16	hM4Di	CNO	Value	7	PressesWithApproach
16	hM4Di	Veh	Devalue	14	PressesWithoutApproach
16	hM4Di	Veh	Value	12	PressesWithoutApproach
16	hM4Di	Veh	Devalue	3	PressesWithApproach
16	hM4Di	Veh	Value	3	PressesWithApproach
16	hM4Di	CNO	Devalue	5	PressesWithoutApproach
16	hM4Di	CNO	Value	28	PressesWithoutApproach
16	hM4Di	CNO	Devalue	2	PressesWithApproach
16	hM4Di	CNO	Value	9	PressesWithApproach
16	hM4Di	Veh	Devalue	13	PressesWithoutApproach
16	hM4Di	Veh	Value	21	PressesWithoutApproach
16	hM4Di	Veh	Devalue	12	PressesWithApproach
16	hM4Di	Veh	Value	9	PressesWithApproach
17	hM4Di	CNO	Devalue	16	PressesWithoutApproach
17	hM4Di	CNO	Value	8	PressesWithoutApproach
17	hM4Di	CNO	Devalue	1	PressesWithApproach
17	hM4Di	CNO	Value	4	PressesWithApproach
17	hM4Di	Veh	Devalue	18	PressesWithoutApproach
17	hM4Di	Veh	Value	2	PressesWithoutApproach
17	hM4Di	Veh	Devalue	1	PressesWithApproach
17	hM4Di	Veh	Value	4	PressesWithApproach
17	hM4Di	CNO	Devalue	1	PressesWithoutApproach
17	hM4Di	CNO	Value	26	PressesWithoutApproach
17	hM4Di	CNO	Devalue	2	PressesWithApproach
17	hM4Di	CNO	Value	2	PressesWithApproach
17	hM4Di	Veh	Devalue	3	PressesWithoutApproach
17	hM4Di	Veh	Value	32	PressesWithoutApproach
17	hM4Di	Veh	Devalue	6	PressesWithApproach
17	hM4Di	Veh	Value	6	PressesWithApproach
18	hM4Di	CNO	Devalue	11	PressesWithoutApproach
18	hM4Di	CNO	Value	21	PressesWithoutApproach
18	hM4Di	CNO	Devalue	2	PressesWithApproach
18	hM4Di	CNO	Value	8	PressesWithApproach
18	hM4Di	Veh	Devalue	3	PressesWithoutApproach
18	hM4Di	Veh	Value	4	PressesWithoutApproach
18	hM4Di	Veh	Devalue	0	PressesWithApproach
18	hM4Di	Veh	Value	3	PressesWithApproach
18	hM4Di	CNO	Devalue	46	PressesWithoutApproach
18	hM4Di	CNO	Value	14	PressesWithoutApproach
18	hM4Di	CNO	Devalue	16	PressesWithApproach
18	hM4Di	CNO	Value	3	PressesWithApproach
18	hM4Di	Veh	Devalue	15	PressesWithoutApproach
18	hM4Di	Veh	Value	91	PressesWithoutApproach
18	hM4Di	Veh	Devalue	9	PressesWithApproach
18	hM4Di	Veh	Value	5	PressesWithApproach
19	mCherry	CNO	Devalue	2	PressesWithoutApproach
19	mCherry	CNO	Value	0	PressesWithoutApproach
19	mCherry	CNO	Devalue	1	PressesWithApproach
19	mCherry	CNO	Value	2	PressesWithApproach
19	mCherry	Veh	Devalue	2	PressesWithoutApproach
19	mCherry	Veh	Value	0	PressesWithoutApproach
19	mCherry	Veh	Devalue	2	PressesWithApproach
19	mCherry	Veh	Value	0	PressesWithApproach
19	mCherry	CNO	Devalue	1	PressesWithoutApproach
19	mCherry	CNO	Value	11	PressesWithoutApproach
19	mCherry	CNO	Devalue	2	PressesWithApproach
19	mCherry	CNO	Value	4	PressesWithApproach
19	mCherry	Veh	Devalue	0	PressesWithoutApproach
19	mCherry	Veh	Value	3	PressesWithoutApproach
19	mCherry	Veh	Devalue	0	PressesWithApproach
19	mCherry	Veh	Value	2	PressesWithApproach
20	mCherry	CNO	Devalue	2	PressesWithoutApproach
20	mCherry	CNO	Value	3	PressesWithoutApproach
20	mCherry	CNO	Devalue	2	PressesWithApproach
20	mCherry	CNO	Value	2	PressesWithApproach
20	mCherry	Veh	Devalue	9	PressesWithoutApproach
20	mCherry	Veh	Value	2	PressesWithoutApproach
20	mCherry	Veh	Devalue	4	PressesWithApproach
20	mCherry	Veh	Value	4	PressesWithApproach
20	mCherry	CNO	Devalue	9	PressesWithoutApproach
20	mCherry	CNO	Value	51	PressesWithoutApproach
20	mCherry	CNO	Devalue	7	PressesWithApproach
20	mCherry	CNO	Value	4	PressesWithApproach
20	mCherry	Veh	Devalue	8	PressesWithoutApproach
20	mCherry	Veh	Value	34	PressesWithoutApproach
20	mCherry	Veh	Devalue	8	PressesWithApproach
20	mCherry	Veh	Value	7	PressesWithApproach
21	mCherry	CNO	Devalue	2	PressesWithoutApproach
21	mCherry	CNO	Value	14	PressesWithoutApproach
21	mCherry	CNO	Devalue	3	PressesWithApproach
21	mCherry	CNO	Value	7	PressesWithApproach
21	mCherry	Veh	Devalue	5	PressesWithoutApproach
21	mCherry	Veh	Value	2	PressesWithoutApproach
21	mCherry	Veh	Devalue	0	PressesWithApproach
21	mCherry	Veh	Value	1	PressesWithApproach
21	mCherry	CNO	Devalue	0	PressesWithoutApproach
21	mCherry	CNO	Value	49	PressesWithoutApproach
21	mCherry	CNO	Devalue	0	PressesWithApproach
21	mCherry	CNO	Value	7	PressesWithApproach
21	mCherry	Veh	Devalue	6	PressesWithoutApproach
21	mCherry	Veh	Value	38	PressesWithoutApproach
21	mCherry	Veh	Devalue	7	PressesWithApproach
21	mCherry	Veh	Value	15	PressesWithApproach
22	mCherry	CNO	Devalue	4	PressesWithoutApproach
22	mCherry	CNO	Value	20	PressesWithoutApproach
22	mCherry	CNO	Devalue	1	PressesWithApproach
22	mCherry	CNO	Value	4	PressesWithApproach
22	mCherry	Veh	Devalue	10	PressesWithoutApproach
22	mCherry	Veh	Value	9	PressesWithoutApproach
22	mCherry	Veh	Devalue	2	PressesWithApproach
22	mCherry	Veh	Value	6	PressesWithApproach
22	mCherry	CNO	Devalue	4	PressesWithoutApproach
22	mCherry	CNO	Value	50	PressesWithoutApproach
22	mCherry	CNO	Devalue	5	PressesWithApproach
22	mCherry	CNO	Value	5	PressesWithApproach
22	mCherry	Veh	Devalue	2	PressesWithoutApproach
22	mCherry	Veh	Value	166	PressesWithoutApproach
22	mCherry	Veh	Devalue	0	PressesWithApproach
22	mCherry	Veh	Value	6	PressesWithApproach
23	mCherry	CNO	Devalue	5	PressesWithoutApproach
23	mCherry	CNO	Value	0	PressesWithoutApproach
23	mCherry	CNO	Devalue	3	PressesWithApproach
23	mCherry	CNO	Value	3	PressesWithApproach
23	mCherry	Veh	Devalue	3	PressesWithoutApproach
23	mCherry	Veh	Value	0	PressesWithoutApproach
23	mCherry	Veh	Devalue	2	PressesWithApproach
23	mCherry	Veh	Value	1	PressesWithApproach
23	mCherry	CNO	Devalue	0	PressesWithoutApproach
23	mCherry	CNO	Value	4	PressesWithoutApproach
23	mCherry	CNO	Devalue	5	PressesWithApproach
23	mCherry	CNO	Value	5	PressesWithApproach
23	mCherry	Veh	Devalue	2	PressesWithoutApproach
23	mCherry	Veh	Value	15	PressesWithoutApproach
23	mCherry	Veh	Devalue	10	PressesWithApproach
23	mCherry	Veh	Value	11	PressesWithApproach
24	hM4Di	CNO	Devalue	8	PressesWithoutApproach
24	hM4Di	CNO	Value	6	PressesWithoutApproach
24	hM4Di	CNO	Devalue	3	PressesWithApproach
24	hM4Di	CNO	Value	3	PressesWithApproach
24	hM4Di	Veh	Devalue	7	PressesWithoutApproach
24	hM4Di	Veh	Value	2	PressesWithoutApproach
24	hM4Di	Veh	Devalue	3	PressesWithApproach
24	hM4Di	Veh	Value	2	PressesWithApproach
24	hM4Di	CNO	Devalue	6	PressesWithoutApproach
24	hM4Di	CNO	Value	39	PressesWithoutApproach
24	hM4Di	CNO	Devalue	9	PressesWithApproach
24	hM4Di	CNO	Value	8	PressesWithApproach
24	hM4Di	Veh	Devalue	2	PressesWithoutApproach
24	hM4Di	Veh	Value	38	PressesWithoutApproach
24	hM4Di	Veh	Devalue	4	PressesWithApproach
24	hM4Di	Veh	Value	5	PressesWithApproach
25	hM4Di	CNO	Devalue	4	PressesWithoutApproach
25	hM4Di	CNO	Value	0	PressesWithoutApproach
25	hM4Di	CNO	Devalue	1	PressesWithApproach
25	hM4Di	CNO	Value	0	PressesWithApproach
25	hM4Di	Veh	Devalue	2	PressesWithoutApproach
25	hM4Di	Veh	Value	0	PressesWithoutApproach
25	hM4Di	Veh	Devalue	1	PressesWithApproach
25	hM4Di	Veh	Value	1	PressesWithApproach
25	hM4Di	CNO	Devalue	0	PressesWithoutApproach
25	hM4Di	CNO	Value	92	PressesWithoutApproach
25	hM4Di	CNO	Devalue	1	PressesWithApproach
25	hM4Di	CNO	Value	8	PressesWithApproach
25	hM4Di	Veh	Devalue	1	PressesWithoutApproach
25	hM4Di	Veh	Value	72	PressesWithoutApproach
25	hM4Di	Veh	Devalue	3	PressesWithApproach
25	hM4Di	Veh	Value	14	PressesWithApproach
26	hM4Di	CNO	Devalue	1	PressesWithoutApproach
26	hM4Di	CNO	Value	4	PressesWithoutApproach
26	hM4Di	CNO	Devalue	1	PressesWithApproach
26	hM4Di	CNO	Value	5	PressesWithApproach
26	hM4Di	Veh	Devalue	2	PressesWithoutApproach
26	hM4Di	Veh	Value	0	PressesWithoutApproach
26	hM4Di	Veh	Devalue	1	PressesWithApproach
26	hM4Di	Veh	Value	0	PressesWithApproach
26	hM4Di	CNO	Devalue	5	PressesWithoutApproach
26	hM4Di	CNO	Value	76	PressesWithoutApproach
26	hM4Di	CNO	Devalue	3	PressesWithApproach
26	hM4Di	CNO	Value	6	PressesWithApproach
26	hM4Di	Veh	Devalue	2	PressesWithoutApproach
26	hM4Di	Veh	Value	60	PressesWithoutApproach
26	hM4Di	Veh	Devalue	0	PressesWithApproach
26	hM4Di	Veh	Value	6	PressesWithApproach

## Sheet: Fig5_S1A
Rat	Group	Drug	Lever	LeverPresses
4	hM4Di	CNO	Devalue	1
4	hM4Di	Veh	Devalue	6
5	hM4Di	CNO	Devalue	30
5	hM4Di	Veh	Devalue	50
5	hM4Di	CNO	Devalue	34
5	hM4Di	Veh	Devalue	23
9	mCherry	CNO	Devalue	26
9	mCherry	Veh	Devalue	57
9	mCherry	CNO	Devalue	2
9	mCherry	Veh	Devalue	4
10	mCherry	CNO	Devalue	0
10	mCherry	Veh	Devalue	0
10	mCherry	CNO	Devalue	0
10	mCherry	Veh	Devalue	4
11	mCherry	CNO	Devalue	42
11	mCherry	Veh	Devalue	27
11	mCherry	CNO	Devalue	6
11	mCherry	Veh	Devalue	12
12	mCherry	CNO	Devalue	98
12	mCherry	Veh	Devalue	7
12	mCherry	CNO	Devalue	2
12	mCherry	Veh	Devalue	14
13	hM4Di	CNO	Devalue	4
13	hM4Di	Veh	Devalue	25
13	hM4Di	CNO	Devalue	8
13	hM4Di	Veh	Devalue	2
14	hM4Di	CNO	Devalue	38
14	hM4Di	Veh	Devalue	31
14	hM4Di	CNO	Devalue	10
14	hM4Di	Veh	Devalue	7
15	hM4Di	CNO	Devalue	15
15	hM4Di	Veh	Devalue	12
15	hM4Di	CNO	Devalue	0
15	hM4Di	Veh	Devalue	0
16	hM4Di	CNO	Devalue	23
16	hM4Di	Veh	Devalue	34
16	hM4Di	CNO	Devalue	6
16	hM4Di	Veh	Devalue	20
17	hM4Di	CNO	Devalue	10
17	hM4Di	Veh	Devalue	40
17	hM4Di	CNO	Devalue	5
17	hM4Di	Veh	Devalue	1
18	hM4Di	CNO	Devalue	16
18	hM4Di	Veh	Devalue	24
18	hM4Di	CNO	Devalue	57
18	hM4Di	Veh	Devalue	42
19	mCherry	CNO	Devalue	2
19	mCherry	Veh	Devalue	11
19	mCherry	CNO	Devalue	2
19	mCherry	Veh	Devalue	10
20	mCherry	CNO	Devalue	26
20	mCherry	Veh	Devalue	37
20	mCherry	CNO	Devalue	20
20	mCherry	Veh	Devalue	25
21	mCherry	CNO	Devalue	2
21	mCherry	Veh	Devalue	16
21	mCherry	CNO	Devalue	1
21	mCherry	Veh	Devalue	0
22	mCherry	CNO	Devalue	20
22	mCherry	Veh	Devalue	40
22	mCherry	CNO	Devalue	5
22	mCherry	Veh	Devalue	0
23	mCherry	CNO	Devalue	12
23	mCherry	Veh	Devalue	8
23	mCherry	CNO	Devalue	24
23	mCherry	Veh	Devalue	1
24	hM4Di	CNO	Devalue	25
24	hM4Di	Veh	Devalue	45
24	hM4Di	CNO	Devalue	4
24	hM4Di	Veh	Devalue	36
25	hM4Di	CNO	Devalue	0
25	hM4Di	Veh	Devalue	0
25	hM4Di	CNO	Devalue	0
25	hM4Di	Veh	Devalue	3
26	hM4Di	CNO	Devalue	0
26	hM4Di	Veh	Devalue	0
26	hM4Di	CNO	Devalue	9
26	hM4Di	Veh	Devalue	2
4	hM4Di	CNO	Value	411
4	hM4Di	Veh	Value	272
5	hM4Di	CNO	Value	34
5	hM4Di	Veh	Value	40
5	hM4Di	CNO	Value	17
5	hM4Di	Veh	Value	173
9	mCherry	CNO	Value	5
9	mCherry	Veh	Value	1
9	mCherry	CNO	Value	322
9	mCherry	Veh	Value	286
10	mCherry	CNO	Value	0
10	mCherry	Veh	Value	0
10	mCherry	CNO	Value	487
10	mCherry	Veh	Value	352
11	mCherry	CNO	Value	6
11	mCherry	Veh	Value	10
11	mCherry	CNO	Value	35
11	mCherry	Veh	Value	28
12	mCherry	CNO	Value	88
12	mCherry	Veh	Value	41
12	mCherry	CNO	Value	312
12	mCherry	Veh	Value	310
13	hM4Di	CNO	Value	10
13	hM4Di	Veh	Value	5
13	hM4Di	CNO	Value	63
13	hM4Di	Veh	Value	44
14	hM4Di	CNO	Value	7
14	hM4Di	Veh	Value	19
14	hM4Di	CNO	Value	78
14	hM4Di	Veh	Value	92
15	hM4Di	CNO	Value	2
15	hM4Di	Veh	Value	0
15	hM4Di	CNO	Value	22
15	hM4Di	Veh	Value	50
16	hM4Di	CNO	Value	29
16	hM4Di	Veh	Value	26
16	hM4Di	CNO	Value	69
16	hM4Di	Veh	Value	113
17	hM4Di	CNO	Value	0
17	hM4Di	Veh	Value	30
17	hM4Di	CNO	Value	95
17	hM4Di	Veh	Value	67
18	hM4Di	CNO	Value	11
18	hM4Di	Veh	Value	70
18	hM4Di	CNO	Value	168
18	hM4Di	Veh	Value	288
19	mCherry	CNO	Value	2
19	mCherry	Veh	Value	13
19	mCherry	CNO	Value	82
19	mCherry	Veh	Value	30
20	mCherry	CNO	Value	44
20	mCherry	Veh	Value	31
20	mCherry	CNO	Value	165
20	mCherry	Veh	Value	150
21	mCherry	CNO	Value	1
21	mCherry	Veh	Value	13
21	mCherry	CNO	Value	90
21	mCherry	Veh	Value	153
22	mCherry	CNO	Value	18
22	mCherry	Veh	Value	6
22	mCherry	CNO	Value	219
22	mCherry	Veh	Value	426
23	mCherry	CNO	Value	2
23	mCherry	Veh	Value	1
23	mCherry	CNO	Value	45
23	mCherry	Veh	Value	21
24	hM4Di	CNO	Value	4
24	hM4Di	Veh	Value	6
24	hM4Di	CNO	Value	69
24	hM4Di	Veh	Value	105
25	hM4Di	CNO	Value	0
25	hM4Di	Veh	Value	2
25	hM4Di	CNO	Value	289
25	hM4Di	Veh	Value	298
26	hM4Di	CNO	Value	1
26	hM4Di	Veh	Value	1
26	hM4Di	CNO	Value	427
26	hM4Di	Veh	Value	426

## Sheet: Fig5_S1B
Rat	Group	Drug	Lever	PressesFollowedByApproach
4	hM4Di	CNO	Devalue	1
4	hM4Di	Veh	Devalue	4
5	hM4Di	CNO	Devalue	5
5	hM4Di	Veh	Devalue	11
5	hM4Di	CNO	Devalue	20
5	hM4Di	Veh	Devalue	19
9	mCherry	CNO	Devalue	10
9	mCherry	Veh	Devalue	15
9	mCherry	CNO	Devalue	2
9	mCherry	Veh	Devalue	3
10	mCherry	CNO	Devalue	0
10	mCherry	Veh	Devalue	0
10	mCherry	CNO	Devalue	0
10	mCherry	Veh	Devalue	2
11	mCherry	CNO	Devalue	10
11	mCherry	Veh	Devalue	9
11	mCherry	CNO	Devalue	4
11	mCherry	Veh	Devalue	7
12	mCherry	CNO	Devalue	23
12	mCherry	Veh	Devalue	2
12	mCherry	CNO	Devalue	2
12	mCherry	Veh	Devalue	9
13	hM4Di	CNO	Devalue	1
13	hM4Di	Veh	Devalue	4
13	hM4Di	CNO	Devalue	4
13	hM4Di	Veh	Devalue	2
14	hM4Di	CNO	Devalue	6
14	hM4Di	Veh	Devalue	7
14	hM4Di	CNO	Devalue	3
14	hM4Di	Veh	Devalue	3
15	hM4Di	CNO	Devalue	3
15	hM4Di	Veh	Devalue	1
15	hM4Di	CNO	Devalue	0
15	hM4Di	Veh	Devalue	0
16	hM4Di	CNO	Devalue	8
16	hM4Di	Veh	Devalue	7
16	hM4Di	CNO	Devalue	4
16	hM4Di	Veh	Devalue	11
17	hM4Di	CNO	Devalue	2
17	hM4Di	Veh	Devalue	10
17	hM4Di	CNO	Devalue	5
17	hM4Di	Veh	Devalue	1
18	hM4Di	CNO	Devalue	6
18	hM4Di	Veh	Devalue	8
18	hM4Di	CNO	Devalue	22
18	hM4Di	Veh	Devalue	14
19	mCherry	CNO	Devalue	1
19	mCherry	Veh	Devalue	5
19	mCherry	CNO	Devalue	1
19	mCherry	Veh	Devalue	9
20	mCherry	CNO	Devalue	8
20	mCherry	Veh	Devalue	10
20	mCherry	CNO	Devalue	7
20	mCherry	Veh	Devalue	14
21	mCherry	CNO	Devalue	1
21	mCherry	Veh	Devalue	3
21	mCherry	CNO	Devalue	1
21	mCherry	Veh	Devalue	0
22	mCherry	CNO	Devalue	6
22	mCherry	Veh	Devalue	5
22	mCherry	CNO	Devalue	2
22	mCherry	Veh	Devalue	0
23	mCherry	CNO	Devalue	5
23	mCherry	Veh	Devalue	2
23	mCherry	CNO	Devalue	17
23	mCherry	Veh	Devalue	1
24	hM4Di	CNO	Devalue	7
24	hM4Di	Veh	Devalue	9
24	hM4Di	CNO	Devalue	2
24	hM4Di	Veh	Devalue	23
25	hM4Di	CNO	Devalue	0
25	hM4Di	Veh	Devalue	0
25	hM4Di	CNO	Devalue	0
25	hM4Di	Veh	Devalue	2
26	hM4Di	CNO	Devalue	0
26	hM4Di	Veh	Devalue	0
26	hM4Di	CNO	Devalue	7
26	hM4Di	Veh	Devalue	1
4	hM4Di	CNO	Value	40
4	hM4Di	Veh	Value	41
5	hM4Di	CNO	Value	23
5	hM4Di	Veh	Value	25
5	hM4Di	CNO	Value	5
5	hM4Di	Veh	Value	42
9	mCherry	CNO	Value	1
9	mCherry	Veh	Value	0
9	mCherry	CNO	Value	40
9	mCherry	Veh	Value	30
10	mCherry	CNO	Value	0
10	mCherry	Veh	Value	0
10	mCherry	CNO	Value	42
10	mCherry	Veh	Value	30
11	mCherry	CNO	Value	4
11	mCherry	Veh	Value	7
11	mCherry	CNO	Value	13
11	mCherry	Veh	Value	10
12	mCherry	CNO	Value	42
12	mCherry	Veh	Value	14
12	mCherry	CNO	Value	63
12	mCherry	Veh	Value	59
13	hM4Di	CNO	Value	2
13	hM4Di	Veh	Value	1
13	hM4Di	CNO	Value	18
13	hM4Di	Veh	Value	11
14	hM4Di	CNO	Value	3
14	hM4Di	Veh	Value	8
14	hM4Di	CNO	Value	16
14	hM4Di	Veh	Value	24
15	hM4Di	CNO	Value	0
15	hM4Di	Veh	Value	0
15	hM4Di	CNO	Value	4
15	hM4Di	Veh	Value	8
16	hM4Di	CNO	Value	14
16	hM4Di	Veh	Value	11
16	hM4Di	CNO	Value	11
16	hM4Di	Veh	Value	34
17	hM4Di	CNO	Value	0
17	hM4Di	Veh	Value	11
17	hM4Di	CNO	Value	13
17	hM4Di	Veh	Value	7
18	hM4Di	CNO	Value	3
18	hM4Di	Veh	Value	20
18	hM4Di	CNO	Value	17
18	hM4Di	Veh	Value	39
19	mCherry	CNO	Value	2
19	mCherry	Veh	Value	3
19	mCherry	CNO	Value	11
19	mCherry	Veh	Value	7
20	mCherry	CNO	Value	17
20	mCherry	Veh	Value	12
20	mCherry	CNO	Value	18
20	mCherry	Veh	Value	26
21	mCherry	CNO	Value	1
21	mCherry	Veh	Value	8
21	mCherry	CNO	Value	18
21	mCherry	Veh	Value	39
22	mCherry	CNO	Value	4
22	mCherry	Veh	Value	3
22	mCherry	CNO	Value	25
22	mCherry	Veh	Value	45
23	mCherry	CNO	Value	2
23	mCherry	Veh	Value	1
23	mCherry	CNO	Value	19
23	mCherry	Veh	Value	6
24	hM4Di	CNO	Value	4
24	hM4Di	Veh	Value	6
24	hM4Di	CNO	Value	12
24	hM4Di	Veh	Value	17
25	hM4Di	CNO	Value	0
25	hM4Di	Veh	Value	0
25	hM4Di	CNO	Value	28
25	hM4Di	Veh	Value	36
26	hM4Di	CNO	Value	1
26	hM4Di	Veh	Value	0
26	hM4Di	CNO	Value	40
26	hM4Di	Veh	Value	37

## Sheet: Fig5_S1C
Rat	Group	Drug	Lever	PropPressesFollowedByApproach	SqrtPropPressesFollowedByApproach
4	hM4Di	CNO	Devalue	1	1
4	hM4Di	Veh	Devalue	0.666667	0.816497
5	hM4Di	CNO	Devalue	0.166667	0.408248
5	hM4Di	Veh	Devalue	0.22	0.469042
5	hM4Di	CNO	Devalue	0.588235	0.766965
5	hM4Di	Veh	Devalue	0.826087	0.908893
9	mCherry	CNO	Devalue	0.384615	0.620174
9	mCherry	Veh	Devalue	0.263158	0.512989
9	mCherry	CNO	Devalue	1	1
9	mCherry	Veh	Devalue	0.75	0.866025
10	mCherry	CNO	Devalue
10	mCherry	Veh	Devalue
10	mCherry	CNO	Devalue
10	mCherry	Veh	Devalue	0.5	0.707107
11	mCherry	CNO	Devalue	0.238095	0.48795
11	mCherry	Veh	Devalue	0.333333	0.57735
11	mCherry	CNO	Devalue	0.666667	0.816497
11	mCherry	Veh	Devalue	0.583333	0.763763
12	mCherry	CNO	Devalue	0.234694	0.484452
12	mCherry	Veh	Devalue	0.285714	0.534522
12	mCherry	CNO	Devalue	1	1
12	mCherry	Veh	Devalue	0.642857	0.801784
13	hM4Di	CNO	Devalue	0.25	0.5
13	hM4Di	Veh	Devalue	0.16	0.4
13	hM4Di	CNO	Devalue	0.5	0.707107
13	hM4Di	Veh	Devalue	1	1
14	hM4Di	CNO	Devalue	0.157895	0.39736
14	hM4Di	Veh	Devalue	0.225806	0.475191
14	hM4Di	CNO	Devalue	0.3	0.547723
14	hM4Di	Veh	Devalue	0.428571	0.654654
15	hM4Di	CNO	Devalue	0.2	0.447214
15	hM4Di	Veh	Devalue	0.0833333	0.288675
15	hM4Di	CNO	Devalue
15	hM4Di	Veh	Devalue
16	hM4Di	CNO	Devalue	0.347826	0.589768
16	hM4Di	Veh	Devalue	0.205882	0.453743
16	hM4Di	CNO	Devalue	0.666667	0.816497
16	hM4Di	Veh	Devalue	0.55	0.74162
17	hM4Di	CNO	Devalue	0.2	0.447214
17	hM4Di	Veh	Devalue	0.25	0.5
17	hM4Di	CNO	Devalue	1	1
17	hM4Di	Veh	Devalue	1	1
18	hM4Di	CNO	Devalue	0.375	0.612372
18	hM4Di	Veh	Devalue	0.333333	0.57735
18	hM4Di	CNO	Devalue	0.385965	0.621261
18	hM4Di	Veh	Devalue	0.333333	0.57735
19	mCherry	CNO	Devalue	0.5	0.707107
19	mCherry	Veh	Devalue	0.454545	0.6742
19	mCherry	CNO	Devalue	0.5	0.707107
19	mCherry	Veh	Devalue	0.9	0.948683
20	mCherry	CNO	Devalue	0.307692	0.5547
20	mCherry	Veh	Devalue	0.27027	0.519875
20	mCherry	CNO	Devalue	0.35	0.591608
20	mCherry	Veh	Devalue	0.56	0.748331
21	mCherry	CNO	Devalue	0.5	0.707107
21	mCherry	Veh	Devalue	0.1875	0.433013
21	mCherry	CNO	Devalue	1	1
21	mCherry	Veh	Devalue
22	mCherry	CNO	Devalue	0.3	0.547723
22	mCherry	Veh	Devalue	0.125	0.353553
22	mCherry	CNO	Devalue	0.4	0.632456
22	mCherry	Veh	Devalue
23	mCherry	CNO	Devalue	0.416667	0.645497
23	mCherry	Veh	Devalue	0.25	0.5
23	mCherry	CNO	Devalue	0.708333	0.841625
23	mCherry	Veh	Devalue	1	1
24	hM4Di	CNO	Devalue	0.28	0.52915
24	hM4Di	Veh	Devalue	0.2	0.447214
24	hM4Di	CNO	Devalue	0.5	0.707107
24	hM4Di	Veh	Devalue	0.638889	0.799305
25	hM4Di	CNO	Devalue
25	hM4Di	Veh	Devalue
25	hM4Di	CNO	Devalue
25	hM4Di	Veh	Devalue	0.666667	0.816497
26	hM4Di	CNO	Devalue
26	hM4Di	Veh	Devalue
26	hM4Di	CNO	Devalue	0.777778	0.881917
26	hM4Di	Veh	Devalue	0.5	0.707107
4	hM4Di	CNO	Value	0.0973236	0.311967
4	hM4Di	Veh	Value	0.150735	0.388246
5	hM4Di	CNO	Value	0.676471	0.822478
5	hM4Di	Veh	Value	0.625	0.790569
5	hM4Di	CNO	Value	0.294118	0.542326
5	hM4Di	Veh	Value	0.242775	0.492722
9	mCherry	CNO	Value	0.2	0.447214
9	mCherry	Veh	Value	0	0
9	mCherry	CNO	Value	0.124224	0.352454
9	mCherry	Veh	Value	0.104895	0.323875
10	mCherry	CNO	Value
10	mCherry	Veh	Value
10	mCherry	CNO	Value	0.0862423	0.29367
10	mCherry	Veh	Value	0.0852273	0.291937
11	mCherry	CNO	Value	0.666667	0.816497
11	mCherry	Veh	Value	0.7	0.83666
11	mCherry	CNO	Value	0.371429	0.609449
11	mCherry	Veh	Value	0.357143	0.597614
12	mCherry	CNO	Value	0.477273	0.690849
12	mCherry	Veh	Value	0.341463	0.584349
12	mCherry	CNO	Value	0.201923	0.449359
12	mCherry	Veh	Value	0.190323	0.43626
13	hM4Di	CNO	Value	0.2	0.447214
13	hM4Di	Veh	Value	0.2	0.447214
13	hM4Di	CNO	Value	0.285714	0.534522
13	hM4Di	Veh	Value	0.25	0.5
14	hM4Di	CNO	Value	0.428571	0.654654
14	hM4Di	Veh	Value	0.421053	0.648886
14	hM4Di	CNO	Value	0.205128	0.452911
14	hM4Di	Veh	Value	0.26087	0.510754
15	hM4Di	CNO	Value	0	0
15	hM4Di	Veh	Value
15	hM4Di	CNO	Value	0.181818	0.426401
15	hM4Di	Veh	Value	0.16	0.4
16	hM4Di	CNO	Value	0.482759	0.694808
16	hM4Di	Veh	Value	0.423077	0.650444
16	hM4Di	CNO	Value	0.15942	0.399275
16	hM4Di	Veh	Value	0.300885	0.54853
17	hM4Di	CNO	Value
17	hM4Di	Veh	Value	0.366667	0.60553
17	hM4Di	CNO	Value	0.136842	0.369922
17	hM4Di	Veh	Value	0.104478	0.32323
18	hM4Di	CNO	Value	0.272727	0.522233
18	hM4Di	Veh	Value	0.285714	0.534522
18	hM4Di	CNO	Value	0.10119	0.318105
18	hM4Di	Veh	Value	0.135417	0.36799
19	mCherry	CNO	Value	1	1
19	mCherry	Veh	Value	0.230769	0.480384
19	mCherry	CNO	Value	0.134146	0.36626
19	mCherry	Veh	Value	0.233333	0.483046
20	mCherry	CNO	Value	0.386364	0.621582
20	mCherry	Veh	Value	0.387097	0.622171
20	mCherry	CNO	Value	0.109091	0.330289
20	mCherry	Veh	Value	0.173333	0.416333
21	mCherry	CNO	Value	1	1
21	mCherry	Veh	Value	0.615385	0.784465
21	mCherry	CNO	Value	0.2	0.447214
21	mCherry	Veh	Value	0.254902	0.504878
22	mCherry	CNO	Value	0.222222	0.471405
22	mCherry	Veh	Value	0.5	0.707107
22	mCherry	CNO	Value	0.114155	0.337869
22	mCherry	Veh	Value	0.105634	0.325014
23	mCherry	CNO	Value	1	1
23	mCherry	Veh	Value	1	1
23	mCherry	CNO	Value	0.422222	0.649786
23	mCherry	Veh	Value	0.285714	0.534522
24	hM4Di	CNO	Value	1	1
24	hM4Di	Veh	Value	1	1
24	hM4Di	CNO	Value	0.173913	0.417029
24	hM4Di	Veh	Value	0.161905	0.402374
25	hM4Di	CNO	Value
25	hM4Di	Veh	Value	0	0
25	hM4Di	CNO	Value	0.0968858	0.311265
25	hM4Di	Veh	Value	0.120805	0.347571
26	hM4Di	CNO	Value	1	1
26	hM4Di	Veh	Value	0	0
26	hM4Di	CNO	Value	0.0936768	0.306067
26	hM4Di	Veh	Value	0.0868545	0.294711
