# Supplementary figures and images for: Mesolimbic dopamine projections mediate cue-motivated reward seeking but not reward retrieval in rats
Source: eLife journal article supplement (doi:10.7554/elife.43551), 2019-05-20

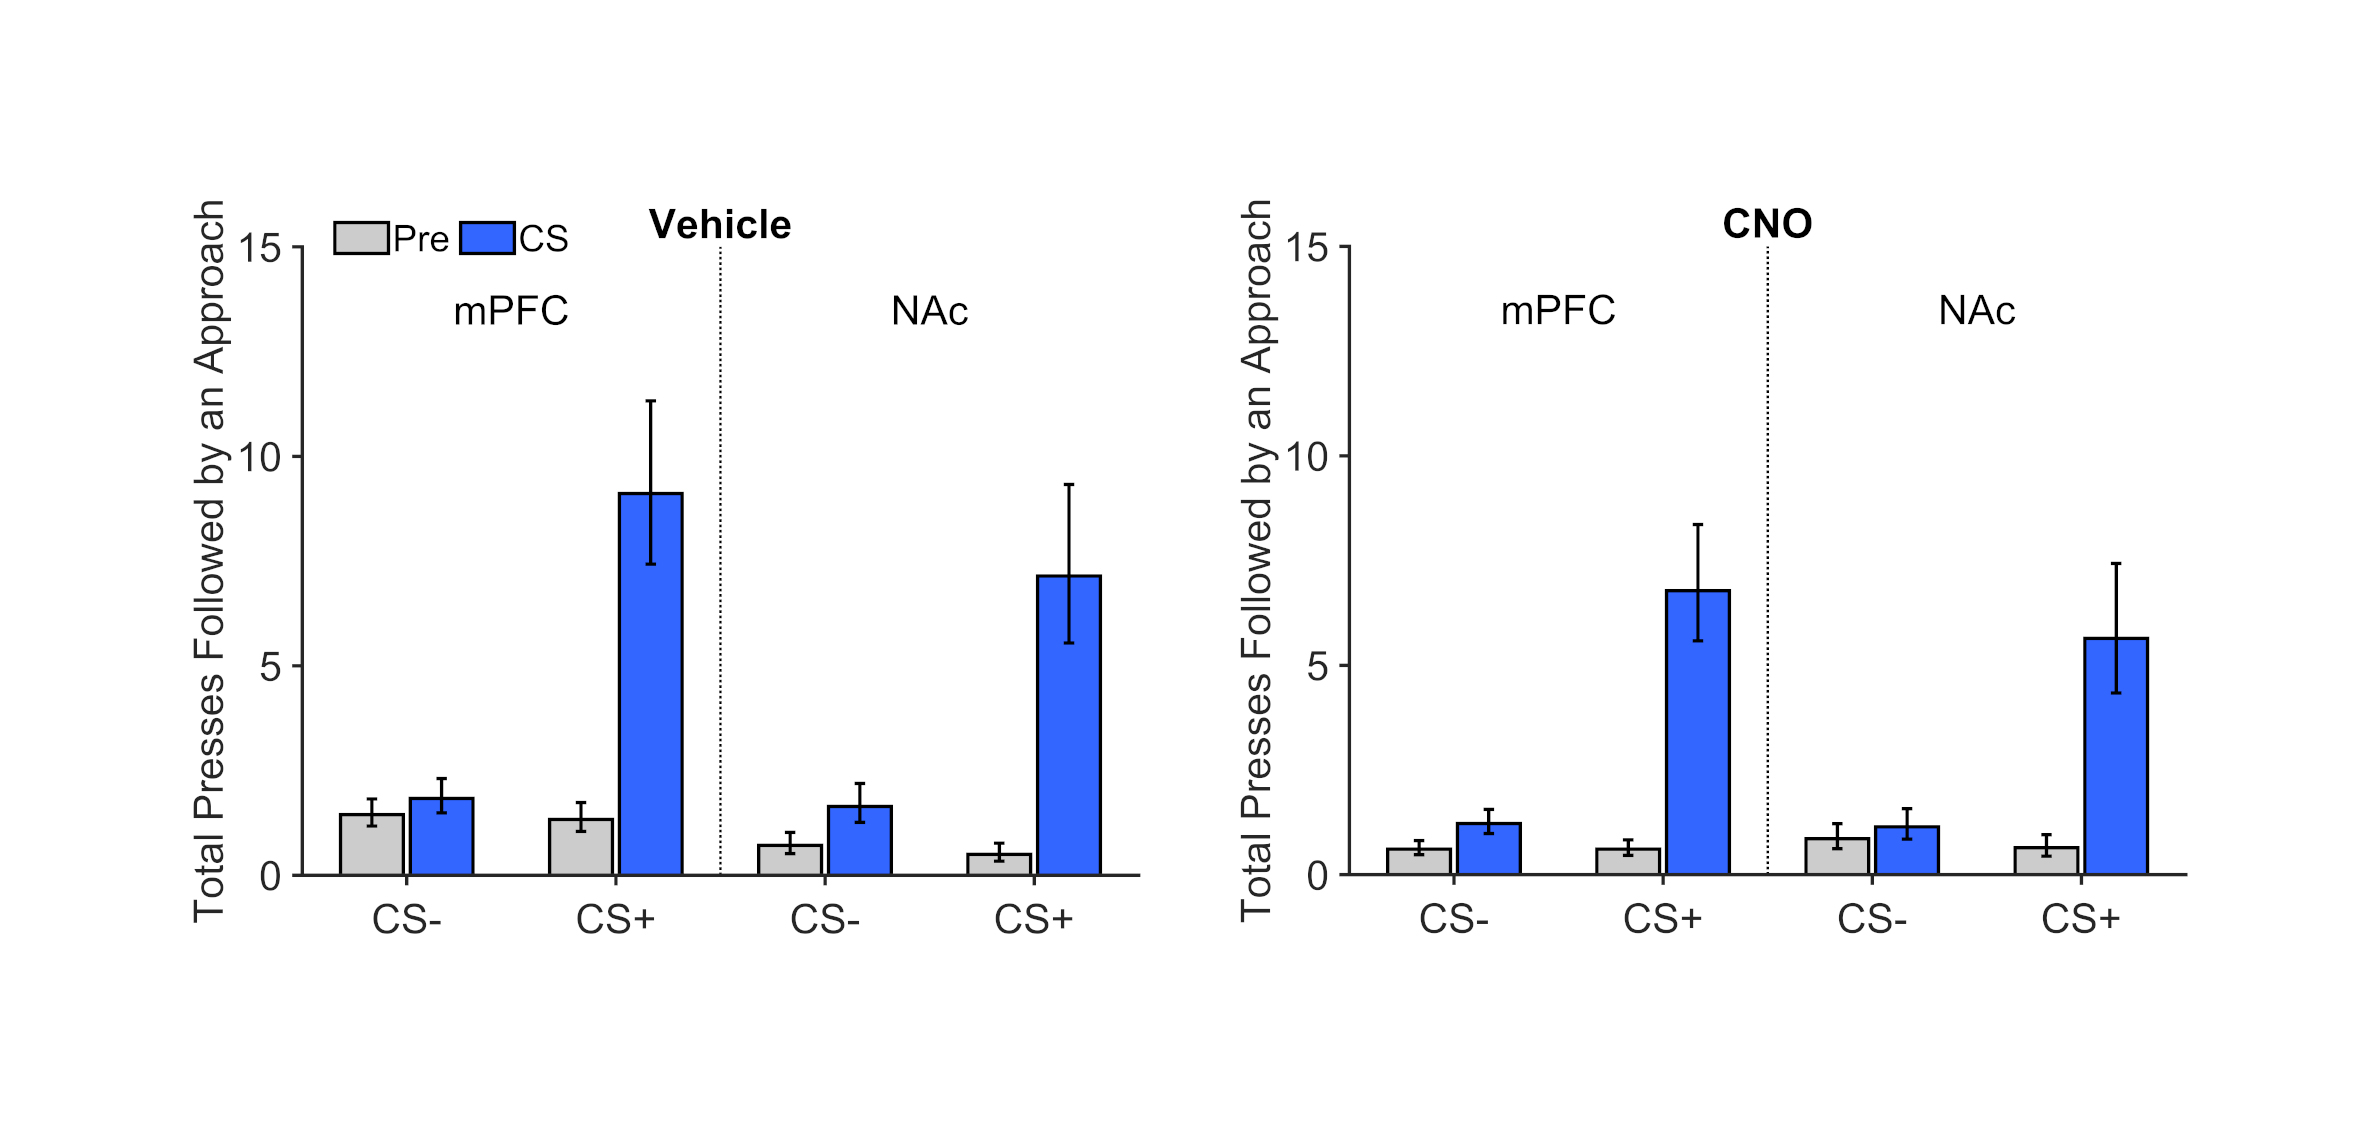

Supplement: supp [file elife-43551-supp-v1.zip › elife_poa_e43551_Figure_4_figure_supplement_3.jpg]

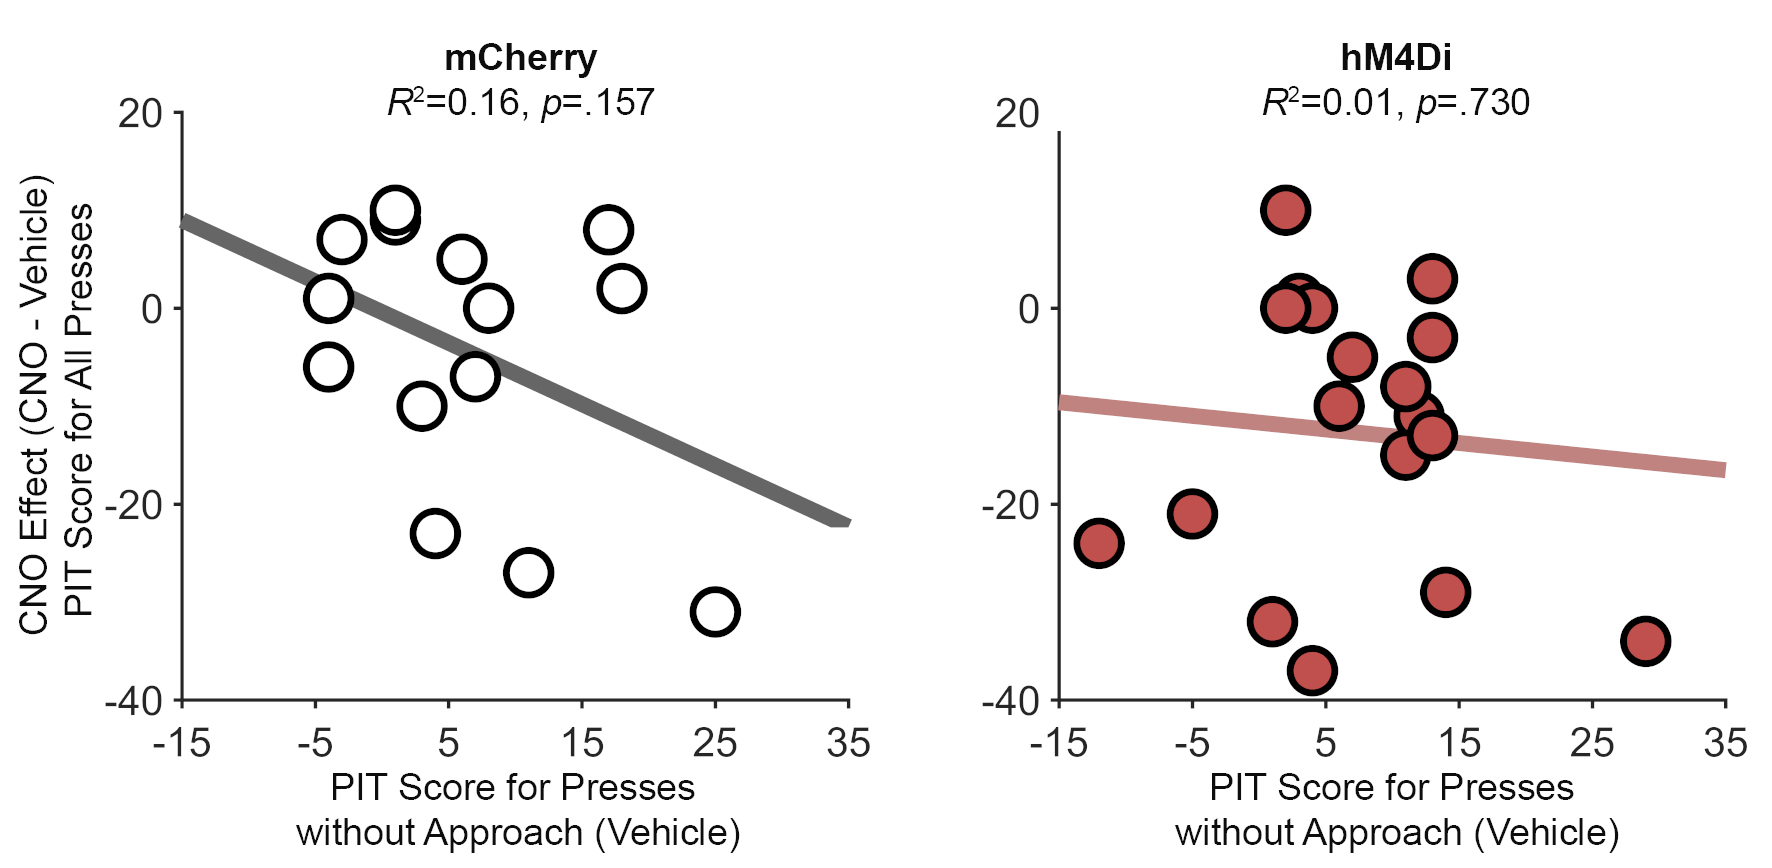

Supplement: supp [file elife-43551-supp-v1.zip › elife_poa_e43551_Figure_4_figure_supplement_5.jpg]

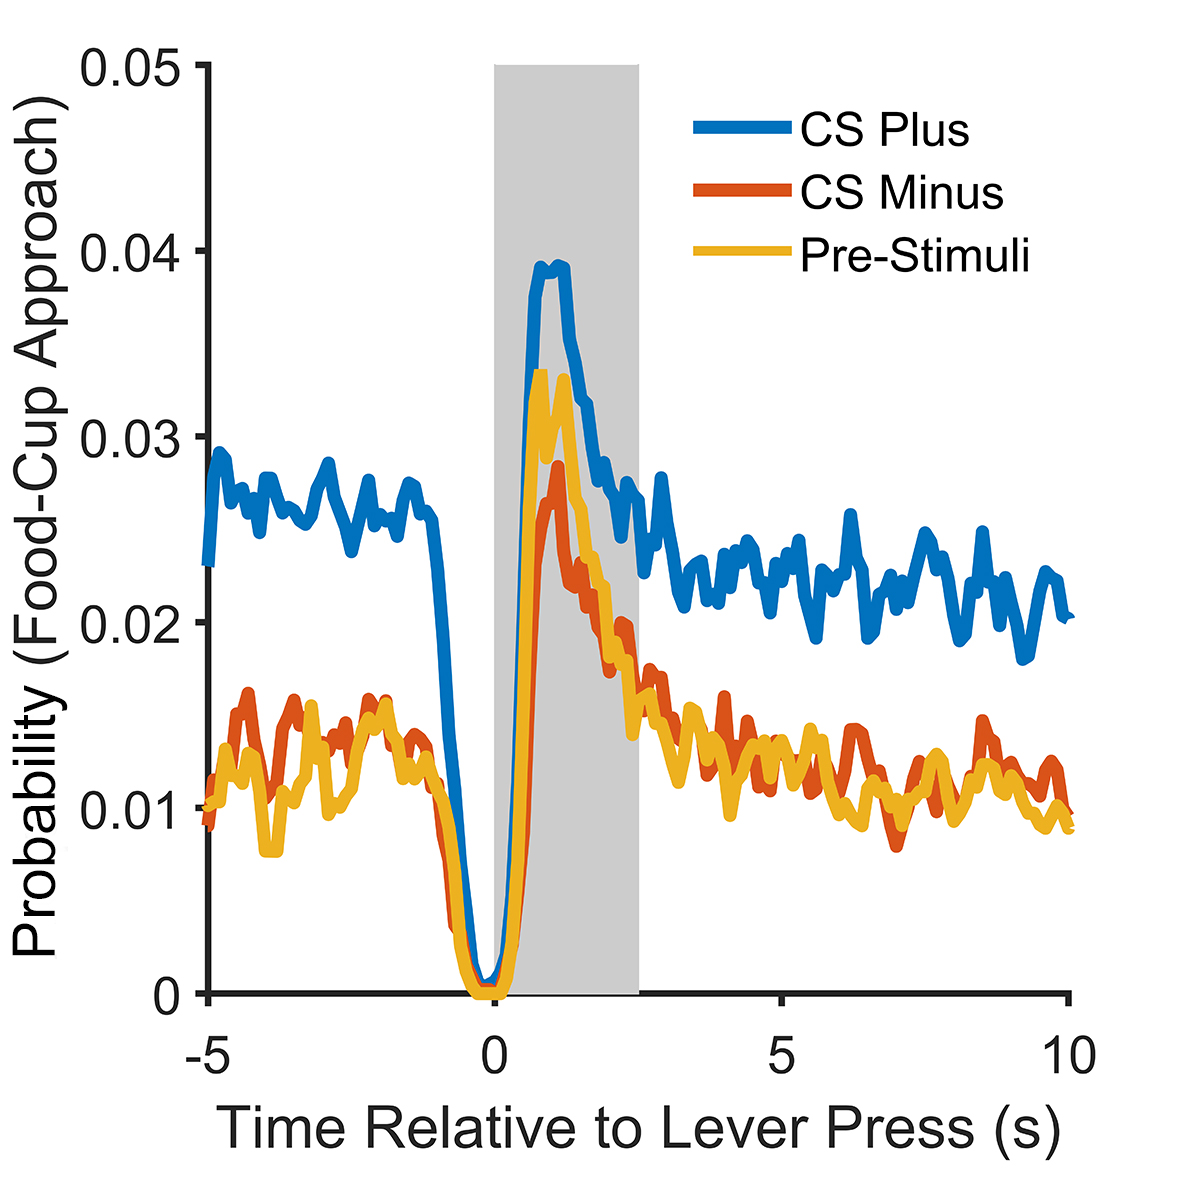

Supplement: supp [file elife-43551-supp-v1.zip › elife_poa_e43551_Figure_3_figure_supplement_1.jpg]

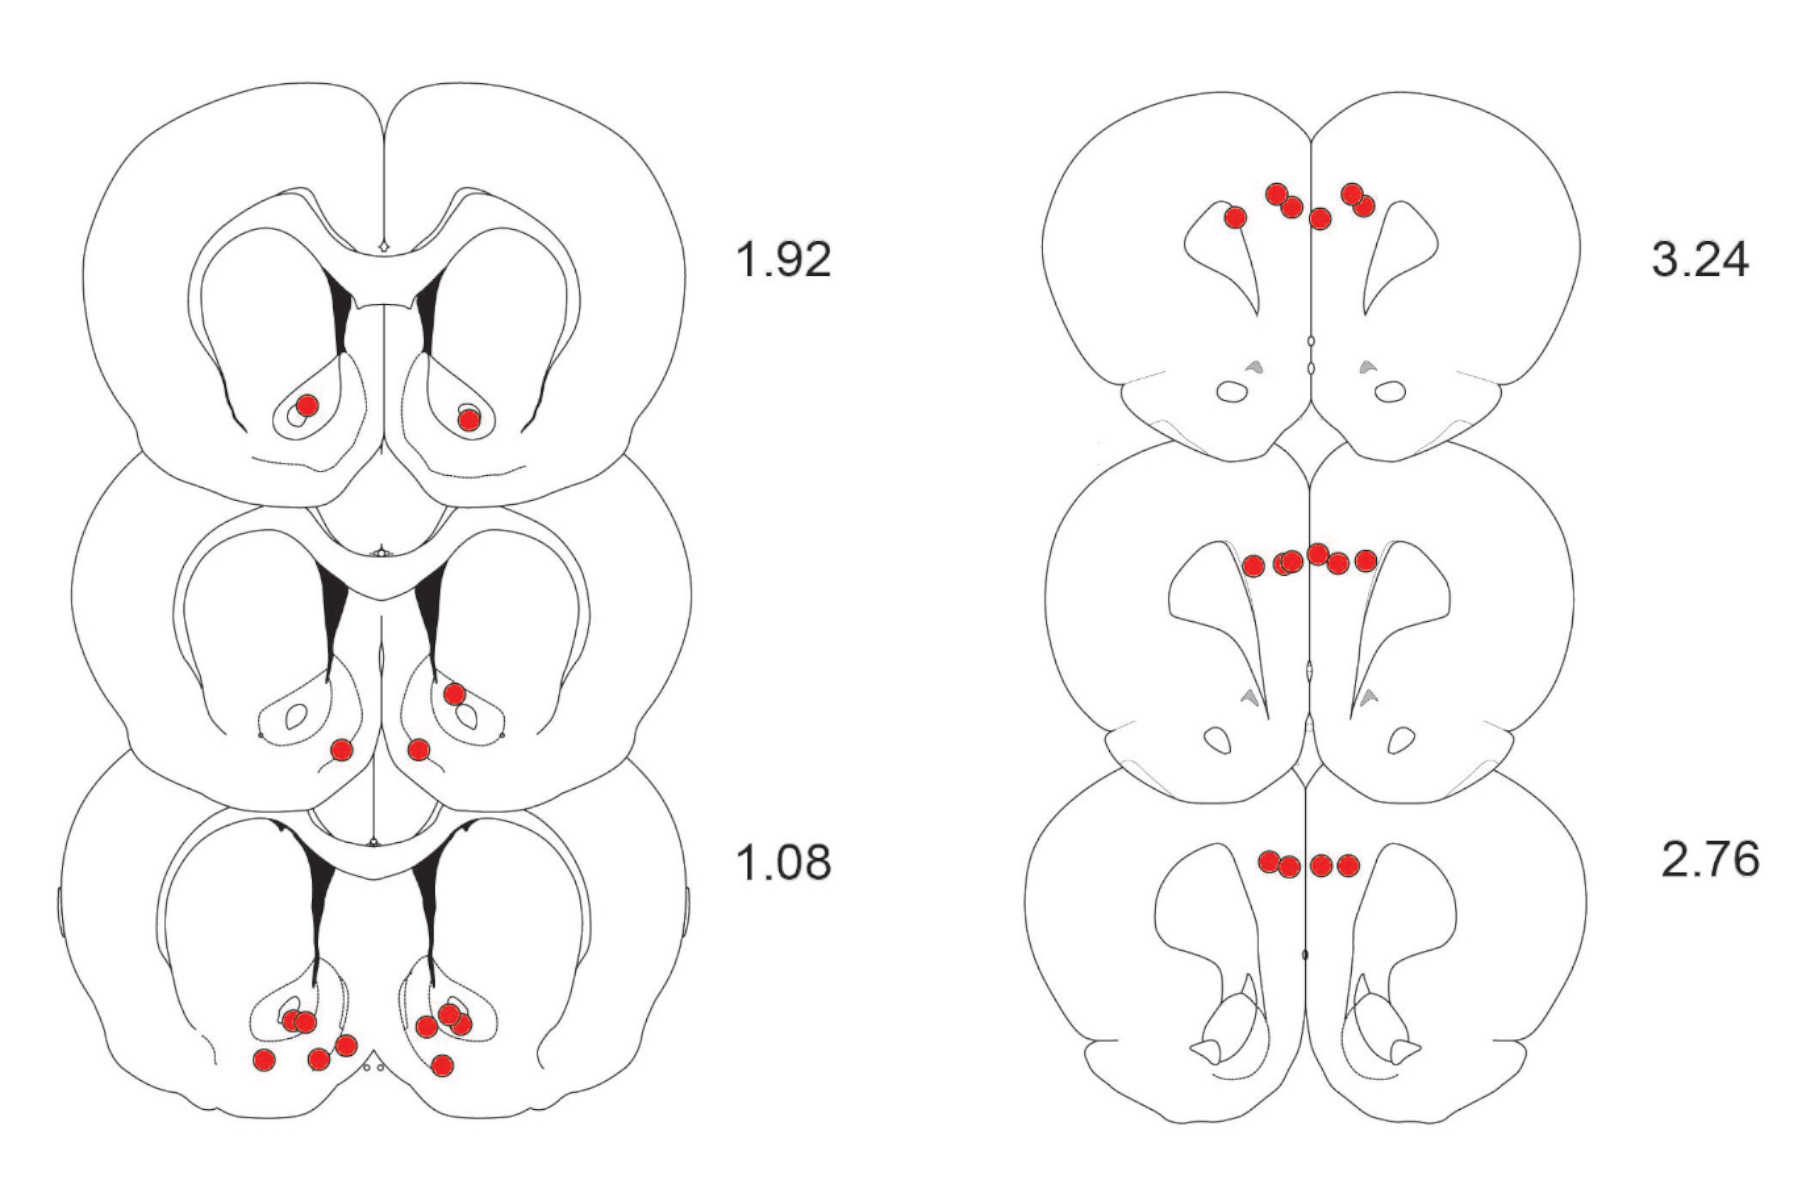

Supplement: supp [file elife-43551-supp-v1.zip › elife_poa_e43551_Figure_4_figure_supplement_1.jpg]

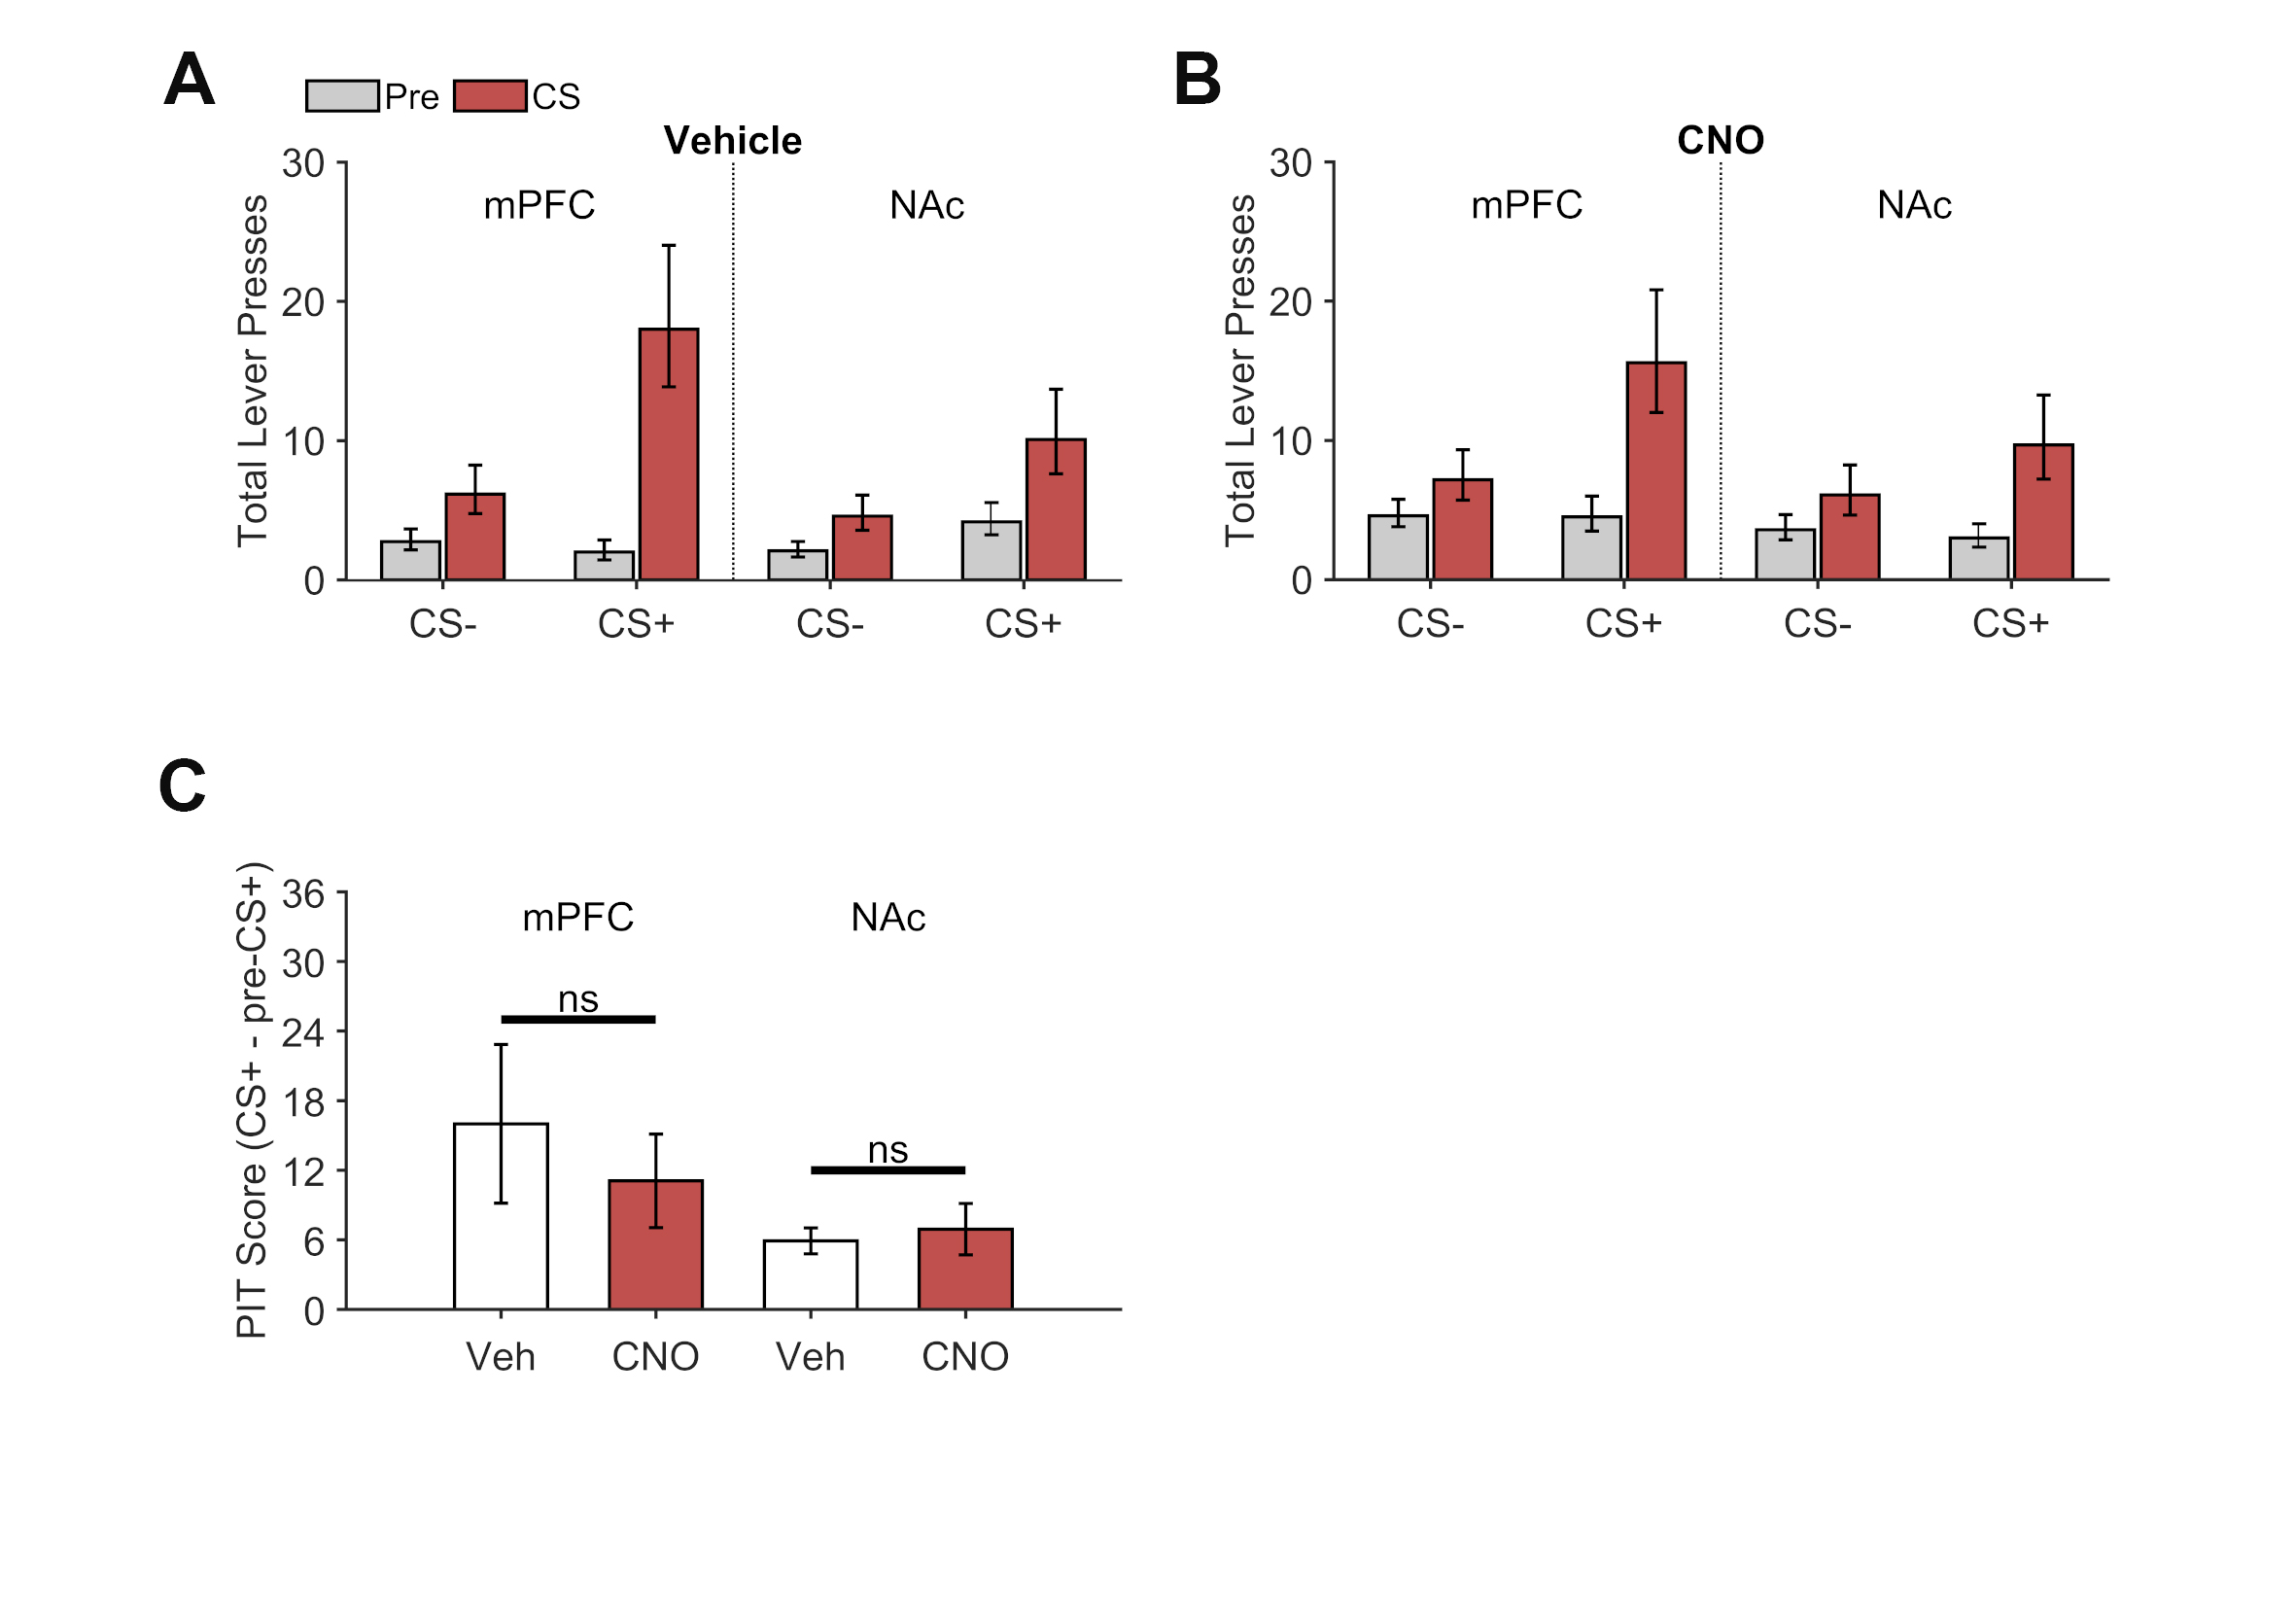

Supplement: supp [file elife-43551-supp-v1.zip › elife_poa_e43551_Figure_4_figure_supplement_2.jpg]

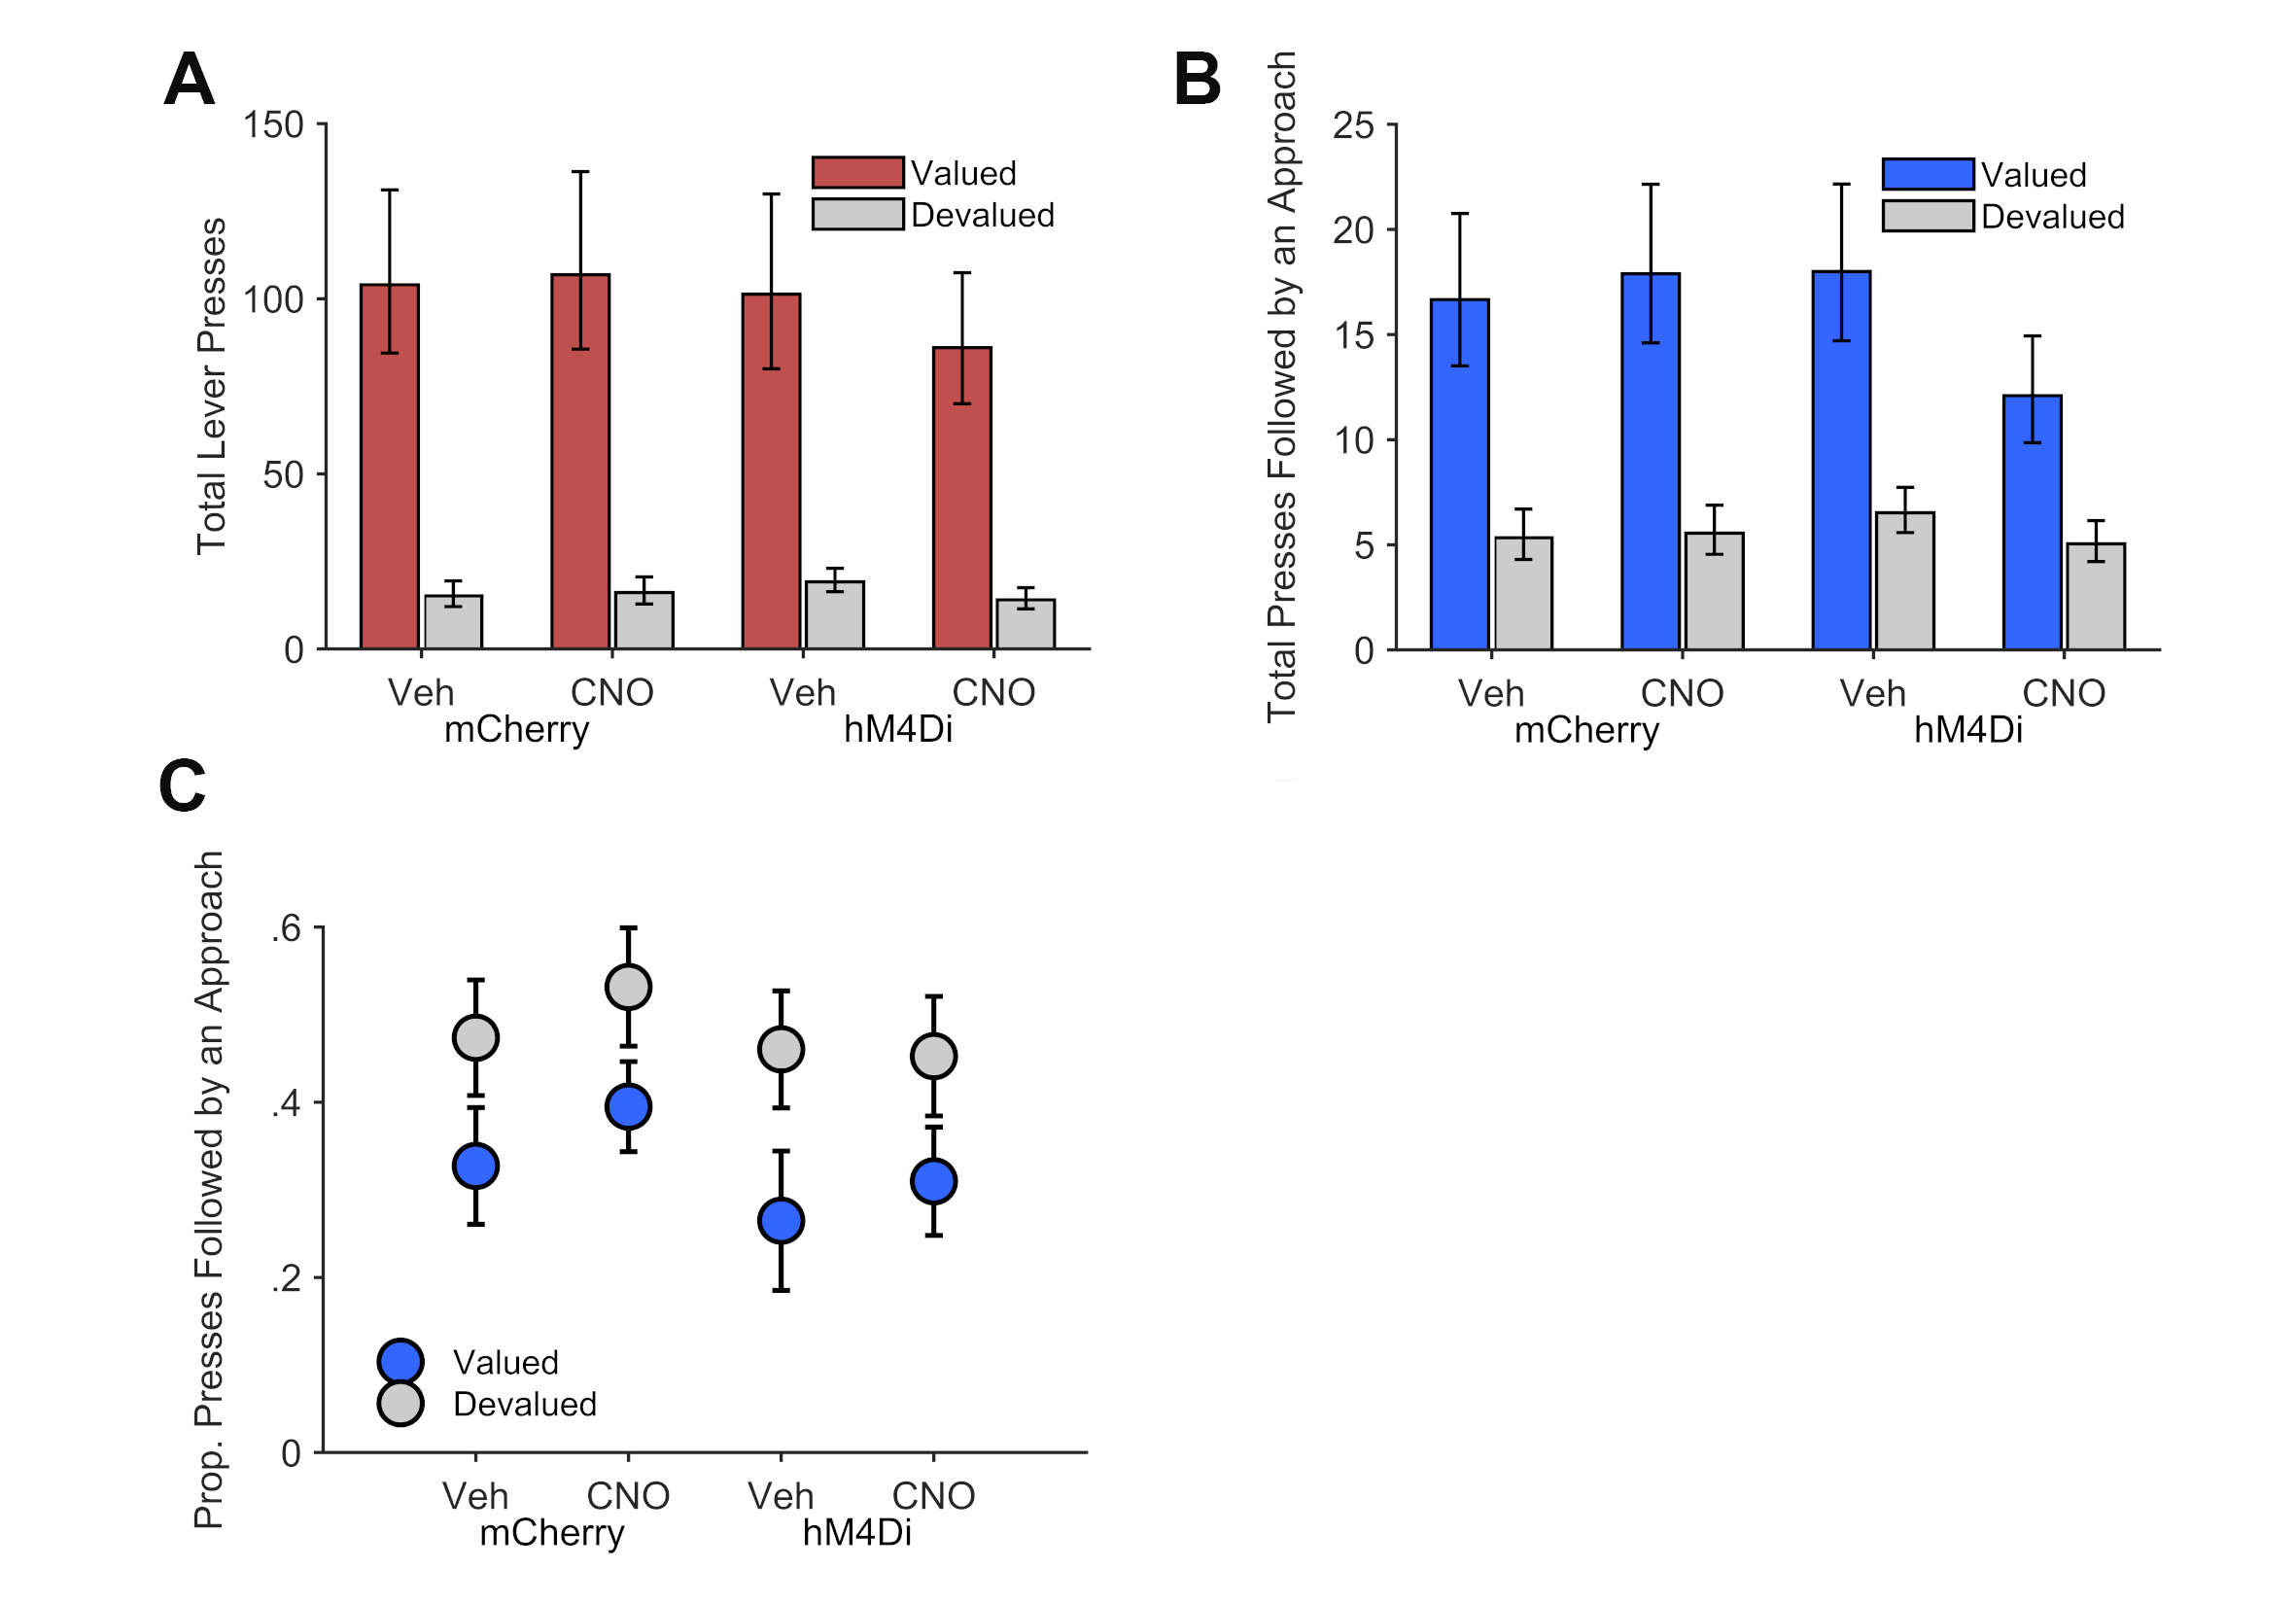

Supplement: supp [file elife-43551-supp-v1.zip › elife_poa_e43551_Figure_5_figure_supplement_1.jpg]

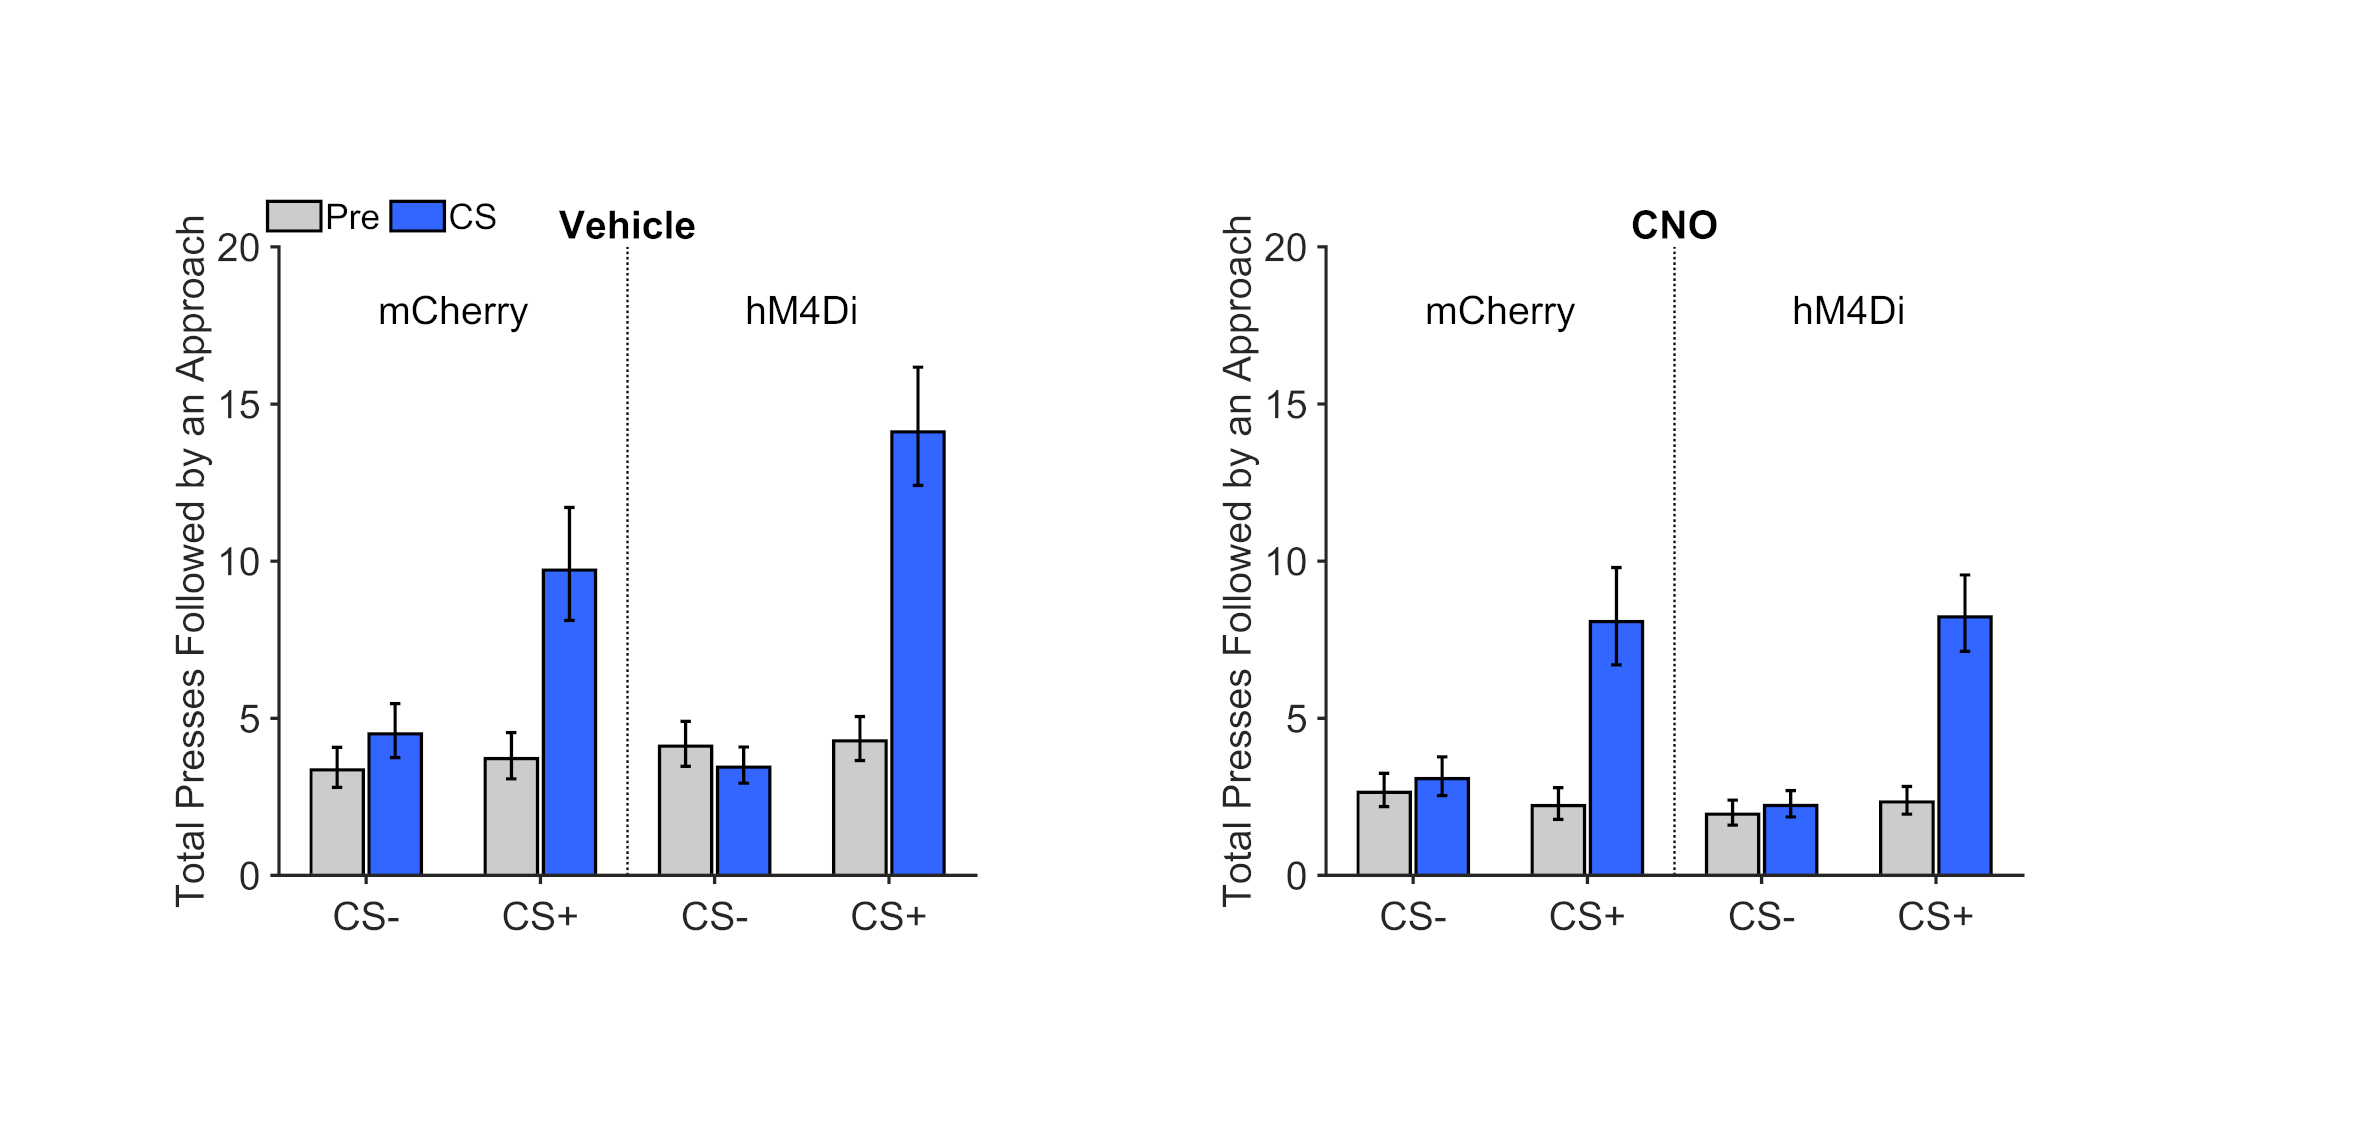

Supplement: supp [file elife-43551-supp-v1.zip › elife_poa_e43551_Figure_3_figure_supplement_2.jpg]

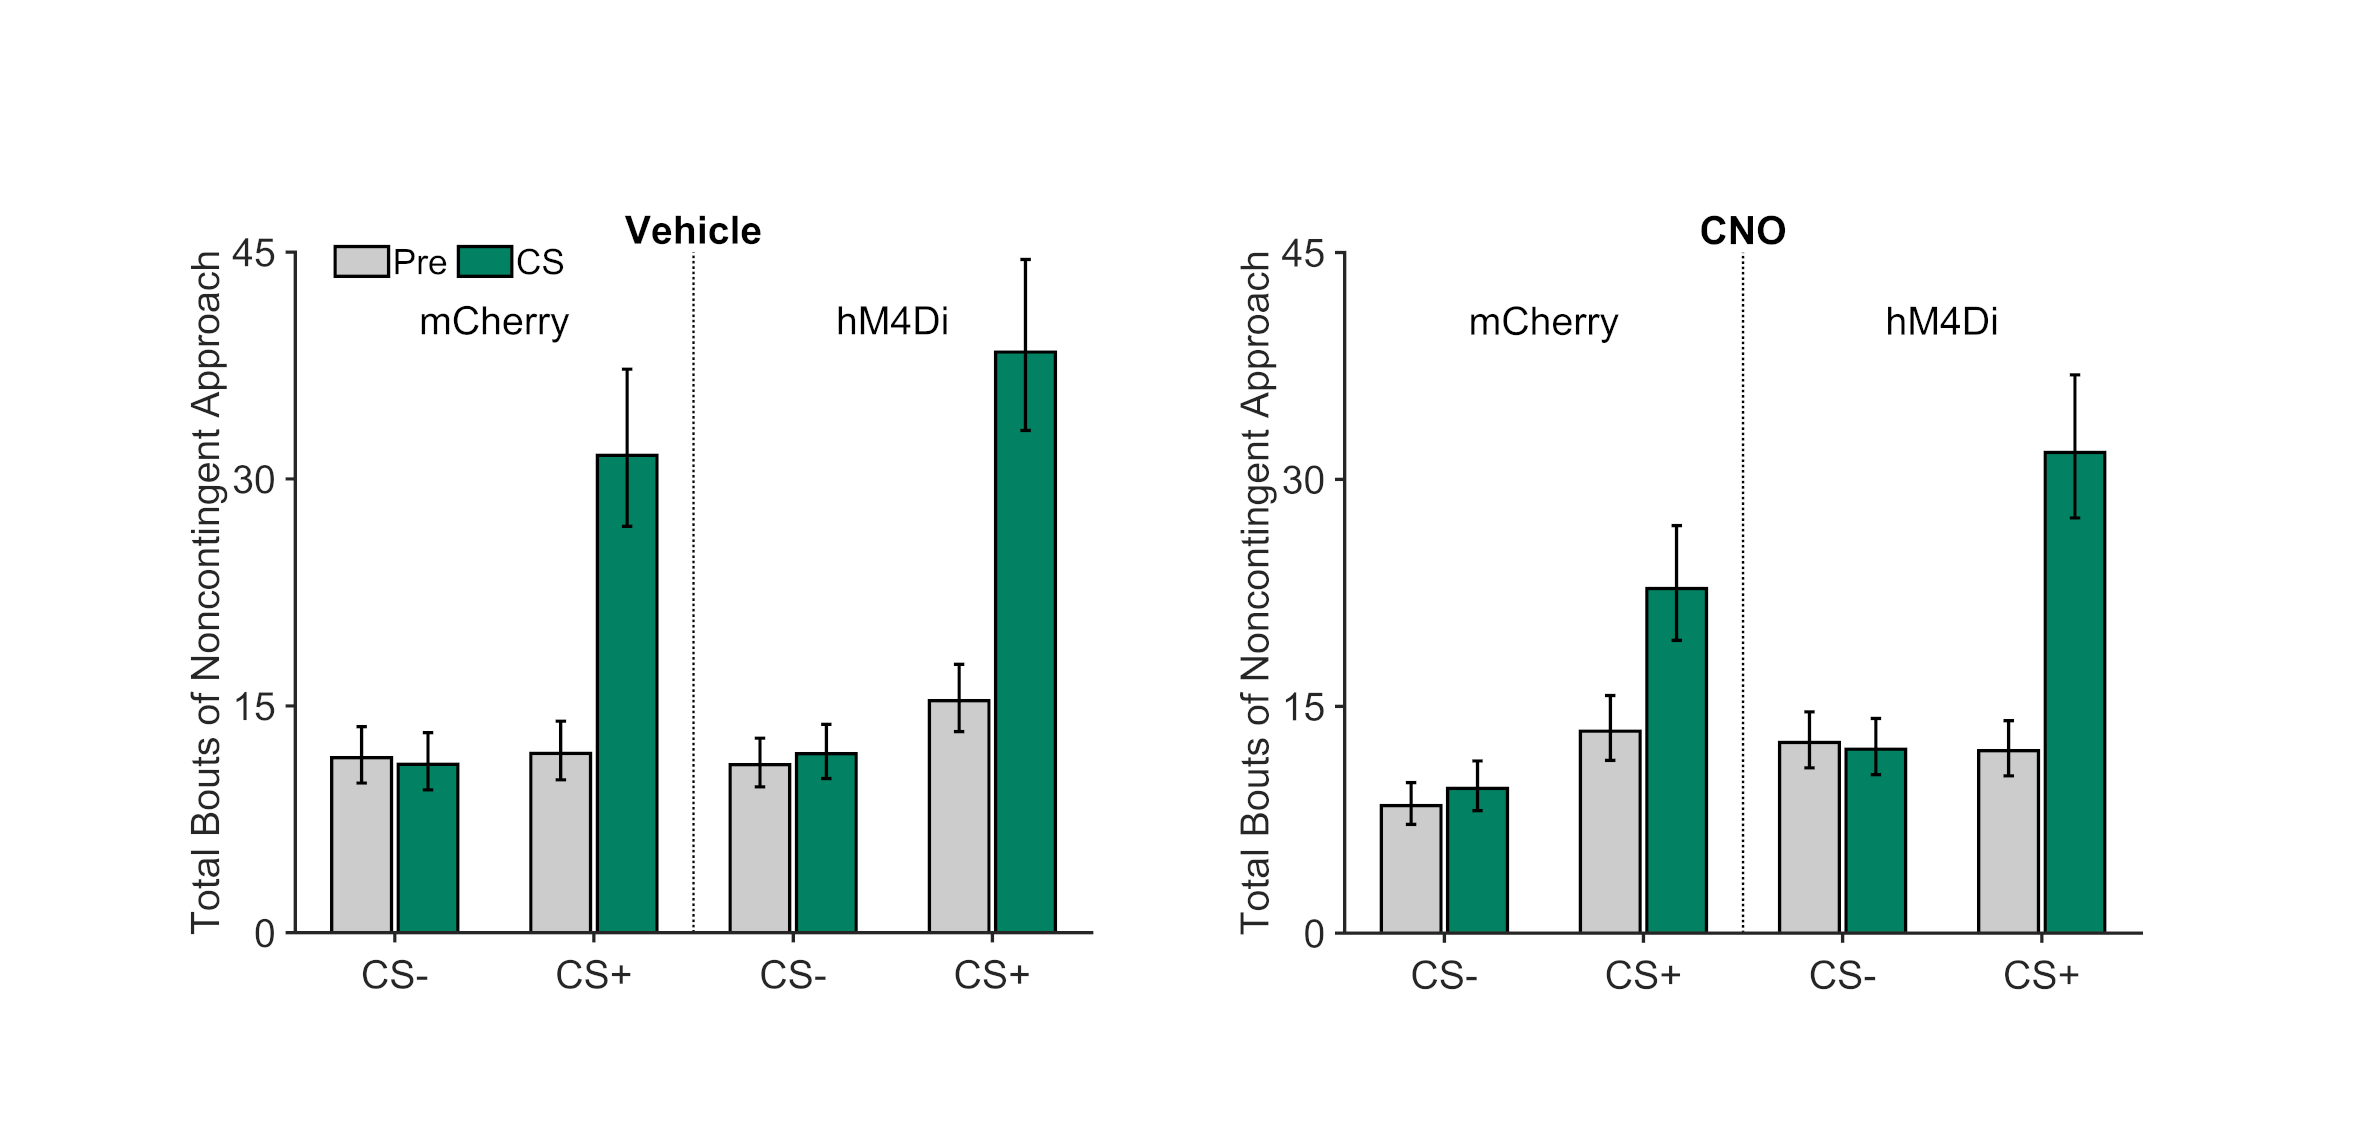

Supplement: supp [file elife-43551-supp-v1.zip › elife_poa_e43551_Figure_3_figure_supplement_3.jpg]

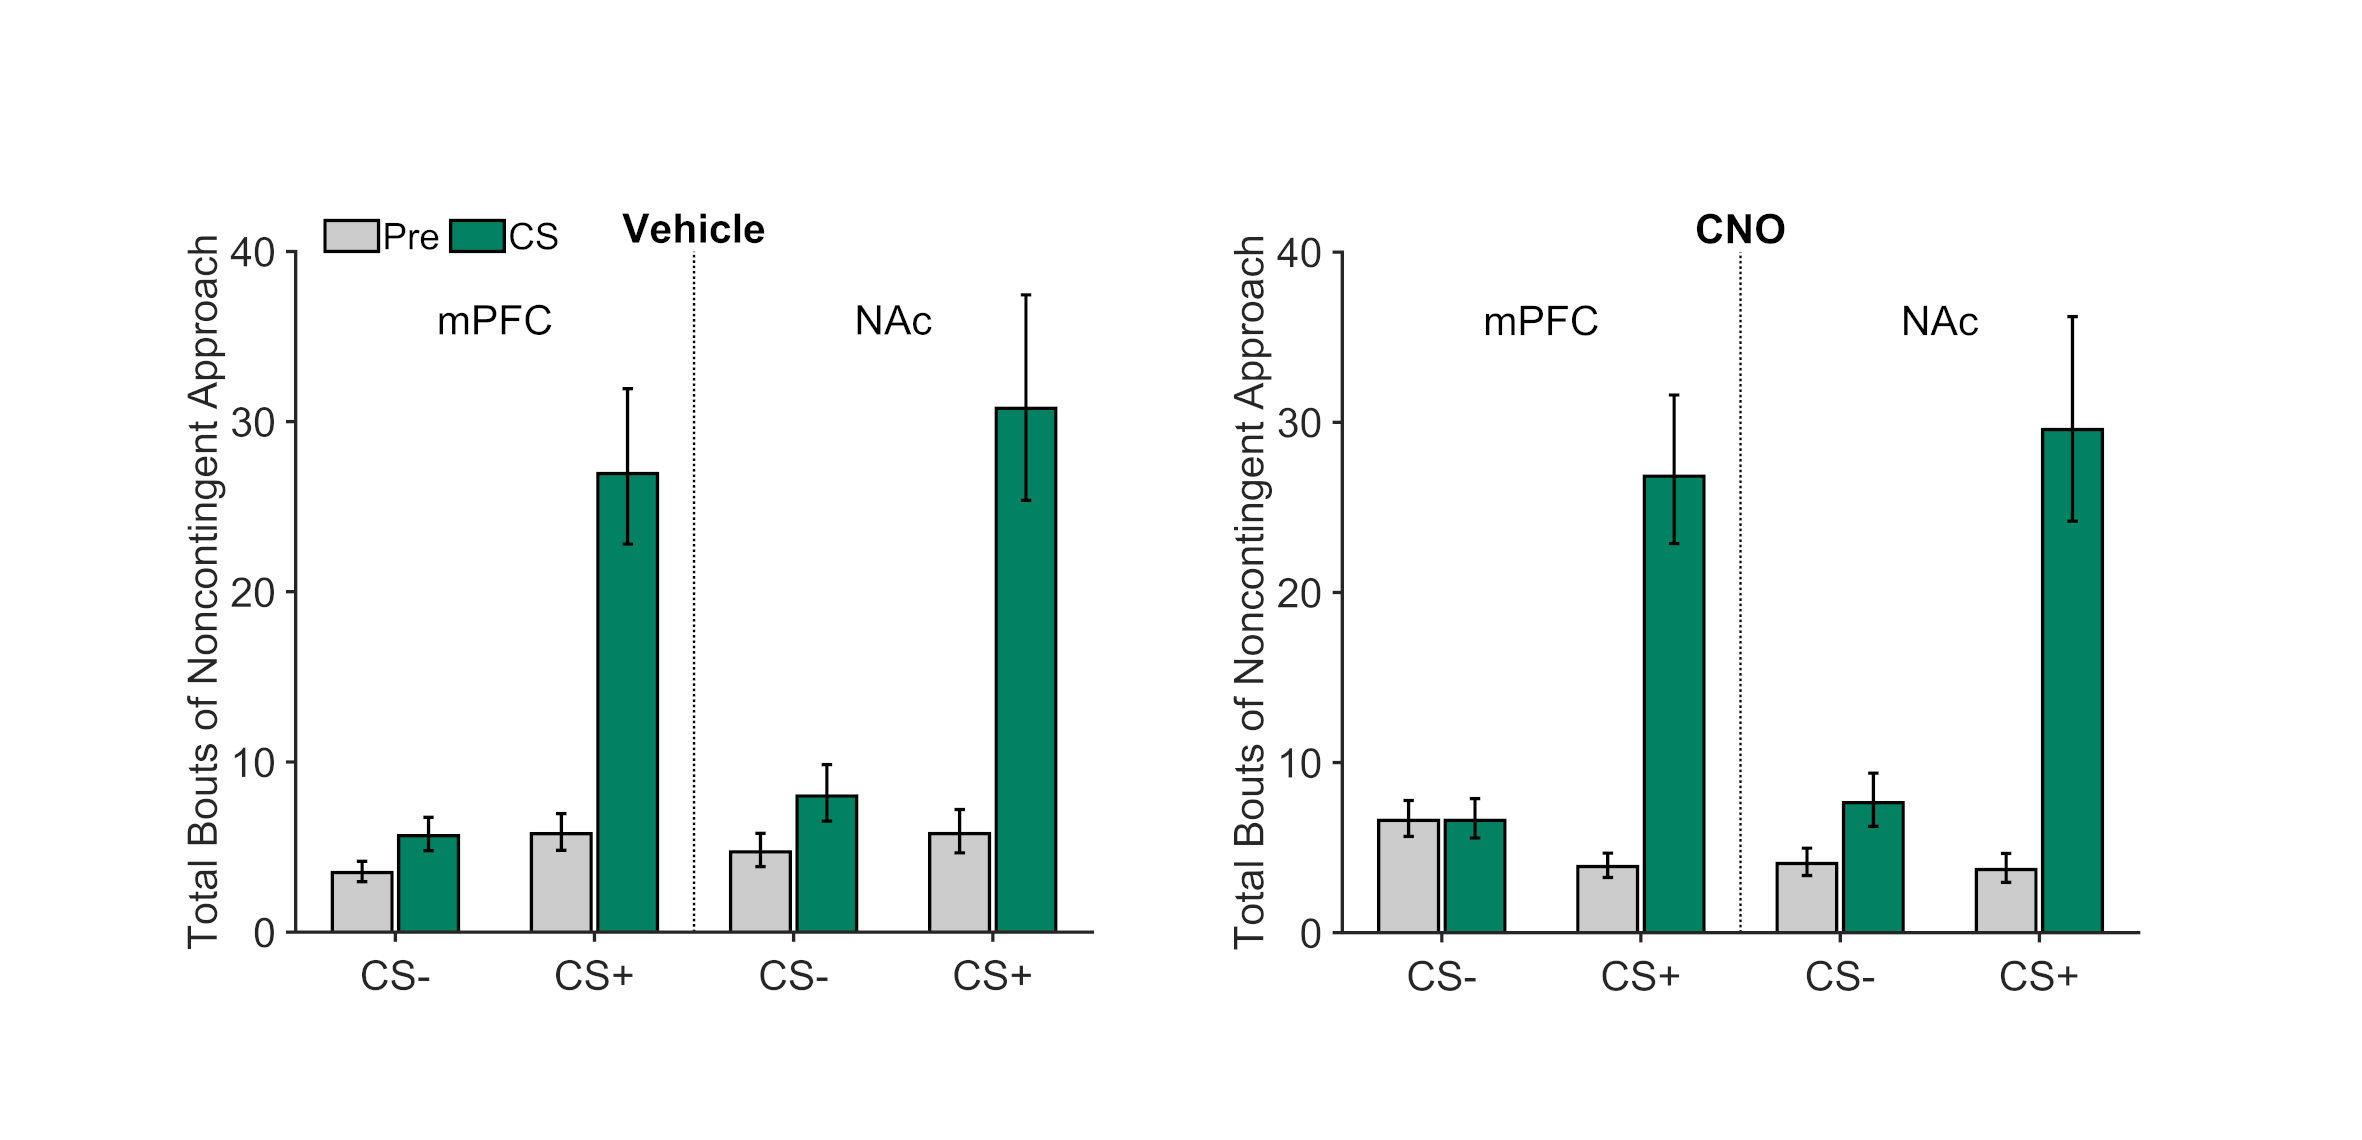

Supplement: supp [file elife-43551-supp-v1.zip › elife_poa_e43551_Figure_4_figure_supplement_4.jpg]
